# Supplementary material
Source: publisher figshare collection journal article supplement (https://acs.figshare.com/ndownloader/files/22679453)
Supplement: Supplementary file 1 [file 22679453]

## Sheet: Sheet1
Dataset S1: List of all proteins and phosphopeptides produced by uninfected and Mtb- and BCG-infected THP1 macrophages. The dataset contains all proteins and phosphopeptides produced by TMT-MS from uninfected, M. tuberculosis H37Rv- and M. bovis BCG-infected THP1 macrophages, respectively.
Checked	Protein FDR Confidence: Combined	Master	Accession	Description	Exp. q-value: Combined	Contaminant	Sum PEP Score	Coverage [%]	# Peptides	# PSMs	# Unique Peptides	# Protein Groups	# AAs	MW [kDa]	calc. pI	Score Mascot: Mascot	Score Sequest HT: Sequest HT	# Peptides (by Search Engine): Mascot	# Peptides (by Search Engine): Sequest HT	Biological Process	Cellular Component	Molecular Function	Pfam IDs	Entrez Gene ID	Gene Symbol	Chromosome	WikiPathways	Ensembl Gene ID	KEGG Pathways	# Razor Peptides	Abundance Ratio: (126) / (128)	Abundance Ratio: (131) / (128)	Abundance Ratio: (130) / (129)	Abundance Ratio: (127) / (129)	Abundance Ratio Adj. P-Value: (126) / (128)	Abundance Ratio Adj. P-Value: (131) / (128)	Abundance Ratio Adj. P-Value: (130) / (129)	Abundance Ratio Adj. P-Value: (127) / (129)	Abundances (Grouped): 126	Abundances (Grouped): 127	Abundances (Grouped): 128	Abundances (Grouped): 129	Abundances (Grouped): 130	Abundances (Grouped): 131	Abundances (Grouped) CV [%]: 126	Abundances (Grouped) CV [%]: 127	Abundances (Grouped) CV [%]: 128	Abundances (Grouped) CV [%]: 129	Abundances (Grouped) CV [%]: 130
FALSE	High	Master Protein	Q09666	Neuroblast differentiation-associated protein AHNAK OS=Homo sapiens OX=9606 GN=AHNAK PE=1 SV=2	0	FALSE	1350.64	62	209	1227	206	1	5890	628.7	6.15	6985	1622.28	199	203	cell organization and biogenesis;regulation of biological process	cytoplasm;cytoskeleton;cytosol;membrane;nucleus	protein binding;RNA binding;structural molecule activity		79026	AHNAK	11		ENSG00000124942.13		4	1.016	0.807	0.915	0.68	1	1	1	0.35034	133.2	60.3	131	88.7	81.2	105.7	10.07	22.54	18.64	11.93	17.2
	Checked	Confidence	Annotated Sequence	Modifications	Modifications in Master Proteins	Contaminant	Qvality PEP	Qvality q-value	# Protein Groups	# Proteins	# PSMs	Master Protein Accessions	Positions in Master Proteins	# Missed Cleavages	Theo. MH+ [Da]	# Razor Quan Results	Abundance Ratio: (126) / (128)	Abundance Ratio: (131) / (128)	Abundance Ratio: (130) / (129)	Abundance Ratio: (127) / (129)	Abundance Ratio Adj. P-Value: (126) / (128)	Abundance Ratio Adj. P-Value: (131) / (128)	Abundance Ratio Adj. P-Value: (130) / (129)	Abundance Ratio Adj. P-Value: (127) / (129)	Abundances (Grouped): 126	Abundances (Grouped): 127	Abundances (Grouped): 128	Abundances (Grouped): 129	Abundances (Grouped): 130	Abundances (Grouped): 131	Abundances (Grouped) CV [%]: 126	Abundances (Grouped) CV [%]: 127	Abundances (Grouped) CV [%]: 128	Abundances (Grouped) CV [%]: 129	Abundances (Grouped) CV [%]: 130	Abundances (Grouped) CV [%]: 131	Quan Info	Found in Sample: [S1] F1: 126, Sample	Found in Sample: [S2] F2: 126, Sample	Found in Sample: [S3] F3: 126, Sample	Found in Sample: [S4] F4: 126, Sample	Found in Sample: [S5] F5: 126, Sample	Found in Sample: [S6] F6: 126, Sample	Found in Sample: [S7] F7: 126, Sample	Found in Sample: [S8] F8: 126, Sample	Found in Sample: [S9] F9: 126, Sample	Found in Sample: [S10] F10: 126, Sample	Found in Sample: [S11] F11: 126, Sample	Found in Sample: [S12] F12: 126, Sample
	FALSE	High	[K].SSKASLGSLEGEAEAEASSPK.[G]	2xPhospho [S8; S]; 2xTMT6plex [K3; K21]; 1xTMT6plex [N-Term]	Q09666 2xPhospho [S5752; S]	FALSE	4.06909e-05	0	1	1	4	Q09666	Q09666 [5745-5765]	1	2882.4	0	1.555	1	0.43	0.317	1	1	1	1	220.8	17.3	142	54.5	23.4	142	5.07	0.72	5.02	5.87	7.29	6.23		Not Found	Not Found	Not Found	Not Found	Not Found	Not Found	Not Found	Not Found	High	High	Not Found	Not Found
	FALSE	High	[K].MPFLSISSPK.[V]	1xPhospho [S8]; 1xOxidation [M1]; 1xTMT6plex [K10]; 1xTMT6plex [N-Term]	Q09666 1xPhospho [S3412]	FALSE	4.43426e-05	0	1	1	1	Q09666	Q09666 [3405-3414]	0	1660.88	0	0.325	0.319	0.348	0.163					71.5	25.7	219.8	157.9	54.9	70.2								Not Found	Not Found	Not Found	Not Found	Not Found	Not Found	Not Found	Not Found	Not Found	Not Found	High	Not Found
	FALSE	High	[K].VDIDTPDINIEGSEGK.[F]	1xPhospho [T5]; 1xTMT6plex [N-Term]; 1xTMT6plex [K16]	Q09666 1xPhospho [T3716]	FALSE	3.75802e-05	0	1	1	4	Q09666	Q09666 [3712-3727]	0	2010.95	0	0.481	0.436	0.809	0.36	1	1	1	1	99.6	33.7	207.1	93.6	75.7	90.3	9.16	9.33	9.41	3.4	13.11	22.31		Not Found	Not Found	Not Found	Not Found	Not Found	Not Found	High	High	Not Found	Not Found	Not Found	Not Found
	FALSE	High	[K].VDIDTPDINIEGSEGK.[F]	1xTMT6plex [N-Term]		FALSE	6.19012e-05	0	1	1	2	Q09666	Q09666 [3712-3727]	0	1930.98	0	0.665	0.431	0.612	0.455					100.5	62.3	151.1	137.1	83.9	65.1								Not Found	Not Found	Not Found	Not Found	Not Found	Not Found	Not Found	Not Found	High	Not Found	Not Found	Not Found
	FALSE	High	[K].VDIDTPDINIEGSEGK.[F]	1xPhospho [T5]	Q09666 1xPhospho [T3716]	FALSE	2.83225e-05	0	1	1	2	Q09666	Q09666 [3712-3727]	0	1781.78	0																					No Quan Labels	Not Found	Not Found	Not Found	Not Found	Not Found	High	Not Found	Not Found	Not Found	Not Found	Not Found	Not Found
	FALSE	High	[K].VDIDTPDIDIHGPEGK.[L]	1xPhospho [T5]; 1xTMT6plex [K16]; 1xTMT6plex [N-Term]	Q09666 1xPhospho [T4100]	FALSE	3.13542e-05	0	1	2	4	Q09666	Q09666 [4096-4111]	0	2259.13	0	0.297	0.272	0.625	0.424	1	1	1	1	70	47.5	236.2	112	70	64.3	3.29	0.24	2.54	0.78	4.21	2.32		Not Found	Not Found	Not Found	Not Found	Not Found	Not Found	Not Found	Not Found	High	High	Not Found	Not Found
	FALSE	High	[K].VDIDTPDIDIHGPEGK.[L]	1xTMT6plex [K16]; 1xTMT6plex [N-Term]		FALSE	3.90391e-05	0	1	2	4	Q09666	Q09666 [4096-4111]	0	2179.16	0	1.21	0.83	1.181	1.236	1	1	1	1	131.2	97.8	108.4	79.1	93.4	90	17.37	31.23	20.29	7.64	0.72	9.38		Not Found	Not Found	Not Found	Not Found	Not Found	Not Found	Not Found	Not Found	Not Found	Not Found	High	High
	FALSE	High	[K].VDIDTPDIDIHGPEGK.[L]	1xPhospho [T5]; 1xTMT6plex [K16]; 1xTMT6plex [N-Term]	Q09666 1xPhospho [T4100]	FALSE	1.21154e-05	0	1	2	4	Q09666	Q09666 [4096-4111]	0	2029.97	0	0.299	0.284	0.853	0.377	0.300228	0.311445	1	0.298594	68	40.5	227.7	107.4	91.6	64.7	3.22	8.32	9.13	15.26	5.08	8.12		Not Found	Not Found	Not Found	Not Found	Not Found	Not Found	High	High	Not Found	Not Found	Not Found	Not Found
	FALSE	High	[K].VDIDAPDVSIEGPDAK.[L]	1xTMT6plex [K16]; 1xTMT6plex [N-Term]		FALSE	3.56733e-05	0	1	3	4	Q09666	Q09666 [4352-4367]	0	2099.13	0	1.408	0.896	1.28	1.37					149.9	93.2	106.4	68	87.1	95.3								Not Found	Not Found	Not Found	Not Found	Not Found	Not Found	Not Found	Not Found	Not Found	High	Not Found	Not Found
	FALSE	High	[K].VDIDTPDINIEGSEGK.[F]	1xTMT6plex [K16]; 1xTMT6plex [N-Term]		FALSE	3.43335e-05	0	1	1	2	Q09666	Q09666 [3712-3727]	0	2160.14	0	0.982	0.639	0.924	1.043					126.2	92.5	128.5	88.7	82	82.1								Not Found	Not Found	Not Found	Not Found	Not Found	Not Found	Not Found	Not Found	Not Found	Not Found	High	Not Found
	FALSE	High	[K].VDIDTPDINIEGSEGK.[F]	1xPhospho [T5]; 1xTMT6plex [K16]; 1xTMT6plex [N-Term]	Q09666 1xPhospho [T3716]	FALSE	8.15664e-08	0	1	1	6	Q09666	Q09666 [3712-3727]	0	2240.11	0	0.478	0.338	0.614	0.368	1	1	1	1	96.3	43.5	201.3	118.2	72.6	68.1	1.11	15.91	10.61	3.15	10.47	6.13		Not Found	Not Found	Not Found	Not Found	Not Found	Not Found	Not Found	Not Found	High	High	Not Found	Not Found
	FALSE	High	[R].VDIETPNLEGTLTGPR.[L]	1xTMT6plex [N-Term]		FALSE	1.49594e-05	0	1	2	4	Q09666	Q09666 [541-556]	0	1941.05	0	0.01	0.01	100	100						160.9	224.5		214.6									Not Found	Not Found	Not Found	Not Found	Not Found	Not Found	Not Found	Not Found	Not Found	Not Found	Not Found	Not Found
	FALSE	High	[K].VDIEGPDVNIEGPEGK.[L]	1xTMT6plex [K16]; 1xTMT6plex [N-Term]		FALSE	1.15277e-07	0	1	2	2	Q09666	Q09666 [2546-2561]; [2674-2689]	0	2126.14	0	1.142	0.715	1.215	1.417					131.1	106.1	114.8	74.9	91	82.1								Not Found	Not Found	Not Found	Not Found	Not Found	Not Found	Not Found	Not Found	Not Found	High	Not Found	Not Found
	FALSE	High	[K].VDIEGPDVNIEGPEGK.[L]	1xTMT6plex [N-Term]		FALSE	3.86672e-06	0	1	2	2	Q09666	Q09666 [2546-2561]; [2674-2689]	0	1896.98	0	1.325	0.73	1.586	1.212					151	80.3	114	66.3	105.1	83.3								Not Found	Not Found	Not Found	Not Found	Not Found	Not Found	Not Found	High	Not Found	Not Found	Not Found	Not Found
	FALSE	High	[K].VDIDVPDVNVQGPDWHLK.[M]	1xTMT6plex [K18]; 1xTMT6plex [N-Term]		FALSE	7.33314e-06	0	1	1	2	Q09666	Q09666 [2876-2893]	0	2504.35	0	1.27	0.484	3.034	2.339					130.3	116.5	102.6	49.8	151.1	49.6								Not Found	Not Found	Not Found	Not Found	Not Found	High	Not Found	Not Found	Not Found	Not Found	Not Found	Not Found
	FALSE	High	[K].VDIEAPDVSLEGPEGK.[L]	1xTMT6plex [N-Term]		FALSE	6.80773e-05	0	1	1	2	Q09666	Q09666 [1162-1177]	0	1883.98	0	1.539	1.574	0.457	0.405					134.8	52.2	87.6	128.7	58.9	137.9								Not Found	Not Found	Not Found	Not Found	Not Found	Not Found	Not Found	Not Found	High	Not Found	Not Found	Not Found
	FALSE	High	[R].DDGVFVQEVTQNSPAAR.[T]	1xTMT6plex [N-Term]		FALSE	4.25536e-05	0	1	9	6	Q09666	Q09666 [29-45]	0	2062.04	0	0.47	0.415	0.458	1.094				1	59.9	154.3	127.4	141	64.5	52.9		9.51	11.13	61.55				Not Found	Not Found	Not Found	Not Found	Not Found	Not Found	Not Found	Not Found	High	Not Found	Not Found	Not Found
	FALSE	High	[R].DDGVFVQEVTQNSPAAR.[T]	1xPhospho [S13]; 1xTMT6plex [N-Term]	Q09666 1xPhospho [S41]	FALSE	2.11265e-05	0	1	9	2	Q09666	Q09666 [29-45]	0	2142.01	0	0.377	0.248	0.286	0.287					82.5	44.7	218.7	155.4	44.5	54.3								Not Found	Not Found	Not Found	Not Found	Not Found	Not Found	High	Not Found	Not Found	Not Found	Not Found	Not Found
	FALSE	High	[R].AVEVQGPSLESGDHGK.[I]	1xTMT6plex [N-Term]		FALSE	5.90944e-05	0	1	2	2	Q09666	Q09666 [288-303]	0	1838.94	0	1.562	0.941	2.366	1.579					138.4	92.5	88.6	58.6	138.6	83.3								Not Found	Not Found	Not Found	Not Found	Not Found	Not Found	Not Found	Not Found	Not Found	High	Not Found	Not Found
	FALSE	High	[K].VGVEVPDVNIEGPEGK.[L]	1xTMT6plex [N-Term]		FALSE	4.32304e-06	0	1	2	2	Q09666	Q09666 [913-928]	0	1867	0	1.536	1.2	1.911	0.825					158	47.6	102.9	57.7	110.3	123.4								Not Found	Not Found	Not Found	Not Found	Not Found	Not Found	Not Found	Not Found	Not Found	Not Found	Not Found	High
	FALSE	High	[K].IDVTAPDVSIEEPEGK.[L]	1xTMT6plex [K16]; 1xTMT6plex [N-Term]		FALSE	2.90956e-06	0	1	2	6	Q09666	Q09666 [785-800]	0	2157.17	0	1.281	0.796	1.177	1.088	1	1	1	1	143.4	85.2	111.9	78.3	92.2	89	14.89	14.29	5.91	17.23	4.17	1.8		Not Found	Not Found	Not Found	Not Found	Not Found	Not Found	Not Found	Not Found	Not Found	Not Found	High	High
	FALSE	High	[K].GPQITGPSLEGDLGLK.[G]	1xTMT6plex [N-Term]		FALSE	3.68062e-05	0	1	2	4	Q09666	Q09666 [372-387]	0	1811.01	0	0.83	0.57	0.698	0.597		1	1	1	103.3	78.4	124.5	131.3	91.6	70.9		56.02	2.82	32.45	11.36	16.29		Not Found	Not Found	Not Found	High	Not Found	Not Found	Not Found	Not Found	Not Found	Not Found	Not Found	Not Found
	FALSE	High	[K].GPQITGPSLEGDLGLK.[G]	1xTMT6plex [K16]; 1xTMT6plex [N-Term]		FALSE	2.86226e-05	0	1	2	2	Q09666	Q09666 [372-387]	0	2040.17	0	1.687	1.021	2.303	1.562					142	92.4	84.2	59.2	136.2	86								Not Found	Not Found	Not Found	Not Found	Not Found	Not Found	High	Not Found	Not Found	Not Found	Not Found	Not Found
	FALSE	High	[K].VDINAPDVEVQGK.[V]	1xTMT6plex [K13]; 1xTMT6plex [N-Term]		FALSE	1.22461e-05	0	1	1	6	Q09666	Q09666 [3385-3397]	0	1842.04	0	1.174	0.857	1.113	0.946	1	1	1	1	136.2	76.8	116	81.2	90.4	99.4	3.62	8.6	0.83	4.29	4.88	0.21		High	High	Not Found	Not Found	Not Found	Not Found	Not Found	Not Found	Not Found	Not Found	Not Found	Not Found
	FALSE	High	[K].VDINAPDVDVQGPDWHLK.[M]	1xTMT6plex [K18]; 1xTMT6plex [N-Term]		FALSE	1.25229e-06	0	1	1	2	Q09666	Q09666 [3132-3149]; [3786-3803]	0	2476.32	0	0.877	0.46	0.964	0.846					116	87.6	132.3	103.5	99.8	60.9								Not Found	Not Found	Not Found	Not Found	High	Not Found	Not Found	Not Found	Not Found	Not Found	Not Found	Not Found
	FALSE	High	[K].VDISAPDVDVHGPDWHLK.[M]	1xTMT6plex [K18]; 1xTMT6plex [N-Term]		FALSE	5.49077e-05	0	1	1	2	Q09666	Q09666 [1364-1381]	0	2458.31	0	0.959	0.363	3.249	2.784					115.6	126.7	120.5	45.5	147.9	43.8								Not Found	Not Found	Not Found	Not Found	Not Found	High	Not Found	Not Found	Not Found	Not Found	Not Found	Not Found
	FALSE	High	[K].GPSLDIDTPDVNIEGPEGK.[L]	1xPhospho [T8]; 1xTMT6plex [N-Term]	Q09666 1xPhospho [T4430]	FALSE	1.38787e-05	0	1	3	2	Q09666	Q09666 [4423-4441]	0	2262.07	0	0.502	0.354	0.599	0.279					106.6	30.6	212.3	109.6	65.7	75.2								Not Found	Not Found	Not Found	Not Found	Not Found	Not Found	Not Found	Not Found	High	Not Found	Not Found	Not Found
	FALSE	High	[K].GPSLDIDTPDVNIEGPEGK.[L]	1xPhospho [T/S]; 1xTMT6plex [K19]; 1xTMT6plex [N-Term]	Q09666 1xPhospho [T/S]	FALSE	3.91743e-05	0	1	3	6	Q09666	Q09666 [4423-4441]	0	2491.24	0	0.445	0.323	0.502	0.238	1	1	1	1	95	30.4	213.7	127.8	64.1	69	19.99	23.91	0.17	21.86	24.27	25.45		Not Found	Not Found	Not Found	Not Found	Not Found	Not Found	Not Found	Not Found	High	High	Not Found	Not Found
	FALSE	High	[K].VDVEVPDVSLEGPEGK.[L]	1xPhospho [S9]; 1xTMT6plex [K16]; 1xTMT6plex [N-Term]	Q09666 1xPhospho [S1298]; 1xPhospho [S3381]; 1xPhospho [S5659]	FALSE	4.79654e-05	0	1	2	6	Q09666	Q09666 [1290-1305]; [2084-2099]; [2279-2294]	0	2207.12	0	0.587	0.692	0.357	0.384	1	1	1	1	97.3	49	165.7	127.7	45.5	114.8	1.24	1.48	2.5	3.64	3.39	0.1		Not Found	Not Found	Not Found	Not Found	Not Found	Not Found	Not Found	Not Found	High	High	Not Found	Not Found
	FALSE	High	[K].VDVEVPDVSLEGPEGK.[L]	1xTMT6plex [K16]; 1xTMT6plex [N-Term]		FALSE	1.31709e-06	0	1	2	2	Q09666	Q09666 [1290-1305]; [2084-2099]; [2279-2294]	0	2127.16	0	1.231	0.731	1.229	1.122					148.7	81	120.9	72.2	88.8	88.4								Not Found	Not Found	Not Found	Not Found	Not Found	Not Found	Not Found	Not Found	Not Found	Not Found	Not Found	High
	FALSE	High	[K].VDVEGPDVNIEGPEGK.[L]	1xTMT6plex [K16]; 1xTMT6plex [N-Term]		FALSE	2.3441e-06	0	1	1	2	Q09666	Q09666 [2930-2945]	0	2112.12	0	0.962	1.139	1.617	1.338					105.1	88.3	109.3	66	106.7	124.5								Not Found	Not Found	Not Found	Not Found	Not Found	Not Found	Not Found	Not Found	High	Not Found	Not Found	Not Found
	FALSE	High	[K].VDVECPDVNIEGPEGK.[W]	1xCarbamidomethyl [C5]; 1xTMT6plex [K16]; 1xTMT6plex [N-Term]		FALSE	1.73755e-05	0	1	1	2	Q09666	Q09666 [2802-2817]	0	2215.13	0	1.147	0.698	1.048	1.125					132.4	96.3	115.4	85.6	89.7	80.6								Not Found	Not Found	Not Found	Not Found	Not Found	Not Found	Not Found	Not Found	High	Not Found	Not Found	Not Found
	FALSE	High	[KN].VDVDVPDVNIEGPDAK.[L]	1xTMT6plex [N-Term]		FALSE	9.97969e-07	0	1	2	6	Q09666	Q09666 [3186-3201]; [3638-3653]; [3968-3983]; [4688-4703]	0	1910.99	0	1.139	0.738	1.848	1.339	1	1	1	1	129.6	87.2	113.7	65.1	120.4	83.9	16.19	35.15	18.76	4.22	15.52	6.03		Not Found	Not Found	Not Found	Not Found	Not Found	Not Found	Not Found	Not Found	High	High	Not Found	Not Found
	FALSE	High	[K].VDVSAPDVEAHGPEWNLK.[M]	1xTMT6plex [K18]; 1xTMT6plex [N-Term]		FALSE	3.26973e-05	0	1	2	4	Q09666	Q09666 [610-627]	0	2421.28	0	0.984	0.801	0.791	0.705	1	1	1	1	111.8	80.1	113.6	113.6	89.9	91	25.09	0.36	8.6	53.36	19.9	10.28		Not Found	Not Found	High	High	Not Found	Not Found	Not Found	Not Found	Not Found	Not Found	Not Found	Not Found
	FALSE	High	[K].GPSLDIDTPDVNIEGPEGK.[L]	1xPhospho [T8]	Q09666 1xPhospho [T4430]	FALSE	4.69595e-06	0	1	3	2	Q09666	Q09666 [4423-4441]	0	2032.91	0																					No Quan Labels	Not Found	Not Found	Not Found	Not Found	Not Found	Not Found	Not Found	Not Found	Not Found	Not Found	Not Found	Not Found
	FALSE	High	[K].SRLSSSSSNDSGNK.[V]	1xPhospho [S]; 1xTMT6plex [K14]; 1xTMT6plex [N-Term]	Q09666 1xPhospho [S]	FALSE	2.9232e-05	0	1	1	7	Q09666	Q09666 [5860-5873]	1	1963.95	0	0.806	0.669	0.489	0.35	1	1	1	1	127.6	39.6	158.3	113.2	55.3	105.9	11.43	41.67	20.49	16.38	65.47	7.49		Not Found	Not Found	Not Found	Not Found	Not Found	Not Found	Not Found	Not Found	Not Found	High	High	Not Found
	FALSE	High	[K].VDTNAPDLSLEGPEGK.[L]	1xTMT6plex [K16]; 1xTMT6plex [N-Term]		FALSE	7.16384e-07	0	1	2	4	Q09666	Q09666 [1034-1049]	0	2100.12	0	0.877	0.698	0.787	0.749	1	1	1	1	105.4	85.8	120.2	114.5	90.2	83.9	15.96	29.13	18.3	31.16	21.47	3.91		Not Found	Not Found	Not Found	Not Found	Not Found	Not Found	Not Found	Not Found	Not Found	Not Found	High	High
	FALSE	High	[K].GPHVDVSGPDIDIEGPEGK.[L]	1xTMT6plex [N-Term]		FALSE	6.51338e-06	0	1	2	4	Q09666	Q09666 [2417-2435]	0	2147.08	0	1.068	0.55	0.935	1.138	1	1	1	1	124.6	109.1	116.7	95.8	89.6	64.2	27.2	20.26	16.78	64.86	37.84	59.2		Not Found	Not Found	Not Found	Not Found	Not Found	Not Found	Not Found	High	High	Not Found	Not Found	Not Found
	FALSE	High	[K].GPHVDVSGPDIDIEGPEGK.[L]	1xTMT6plex [K19]; 1xTMT6plex [N-Term]		FALSE	2.45996e-05	0	1	2	2	Q09666	Q09666 [2417-2435]	0	2376.24	0	0.876	0.598	0.975	1.277					105.8	118.3	120.7	92.6	90.3	72.2								Not Found	Not Found	Not Found	Not Found	Not Found	Not Found	Not Found	Not Found	Not Found	High	Not Found	Not Found
	FALSE	High	[R].EFSGPSTPTGTLEFEGGEVSLEGGK.[V]	1xPhospho [T/S]; 1xTMT6plex [K25]; 1xTMT6plex [N-Term]	Q09666 1xPhospho [T/S]	FALSE	4.37387e-05	0	1	1	8	Q09666	Q09666 [5788-5812]	0	3050.46	0	0.01	0.165	0.718	0.536						74.5	246.2	138.9	99.8	40.6								Not Found	Not Found	Not Found	Not Found	Not Found	Not Found	Not Found	Not Found	Not Found	Not Found	Not Found	Not Found
	FALSE	High	[K].GPFVEAEVPDVDLECPDAK.[L]	1xCarbamidomethyl [C15]; 1xTMT6plex [N-Term]		FALSE	6.35558e-05	0	1	1	4	Q09666	Q09666 [1819-1837]	0	2316.13	0	1.025	0.577	1.593	1.129	1	1	0.714412	1	137	76.5	133.7	67.7	107.9	77.2	4.56	8.43	6.47	19.28	2.33	15		Not Found	Not Found	Not Found	Not Found	Not Found	Not Found	Not Found	Not Found	Not Found	High	High	Not Found
	FALSE	High	[K].GPFVEAEVPDVDLECPDAK.[L]	1xCarbamidomethyl [C15]; 1xTMT6plex [K19]; 1xTMT6plex [N-Term]		FALSE	4.21552e-06	0	1	1	2	Q09666	Q09666 [1819-1837]	0	2545.29	0	1.035	0.692	1.209	1.046					132	81.1	127.5	77.5	93.7	88.3								Not Found	Not Found	Not Found	Not Found	Not Found	Not Found	Not Found	Not Found	Not Found	Not Found	Not Found	High
	FALSE	High	[K].GPAFNMASPESDFGINLK.[G]	1xPhospho [S8]; 1xOxidation [M6]; 1xTMT6plex [N-Term]	Q09666 1xPhospho [S5552]	FALSE	2.60283e-05	0	1	2	4	Q09666	Q09666 [5545-5562]	0	2220.02	0	0.315	0.892	0.249	0.299					41.2	60	130.9	201.1	50	116.7								Not Found	High	Not Found	Not Found	Not Found	Not Found	Not Found	Not Found	Not Found	Not Found	Not Found	Not Found
	FALSE	High	[K].GPAFNMASPESDFGINLK.[G]	1xPhospho [S8]; 1xOxidation [M6]; 1xTMT6plex [K18]; 1xTMT6plex [N-Term]	Q09666 1xPhospho [S5552]	FALSE	2.74665e-06	0	1	2	5	Q09666	Q09666 [5545-5562]	0	2449.19	0	0.398	0.811	0.268	0.371	1	1	1	1	49.6	73.5	124.7	198.1	53	101.2	58.38	21.1	22.24	22.69	33.85	30.49		Not Found	Not Found	Not Found	Not Found	High	High	Not Found	High	Not Found	Not Found	Not Found	Not Found
	FALSE	High	[K].GDLDIAGPNLEGDFK.[G]	1xTMT6plex [K15]; 1xTMT6plex [N-Term]		FALSE	8.71224e-06	0	1	1	2	Q09666	Q09666 [3431-3445]	0	2019.08	0	1.038	0.64	1.271	1.103					125.3	90.5	120.7	82	104.3	77.3								High	Not Found	Not Found	Not Found	Not Found	Not Found	Not Found	Not Found	Not Found	Not Found	Not Found	Not Found
	FALSE	High	[K].LQGSGVSLASK.[K]	1xTMT6plex [K11]; 1xTMT6plex [N-Term]		FALSE	1.58947e-05	0	1	1	2	Q09666	Q09666 [5848-5858]	0	1504.91	0	1.636	0.915	1.178	0.917					158	76.2	96.6	83.1	97.9	88.3								High	Not Found	Not Found	Not Found	Not Found	Not Found	Not Found	Not Found	Not Found	Not Found	Not Found	Not Found
	FALSE	High	[R].AGAISASGPELQGAGHSK.[L]	1xTMT6plex [K18]; 1xTMT6plex [N-Term]		FALSE	5.36316e-05	0	1	2	2	Q09666	Q09666 [226-243]	0	2096.15	0	1.394	0.877	1.492	1.106					154.7	72.8	111	65.8	98.3	97.3								Not Found	Not Found	Not Found	Not Found	High	Not Found	Not Found	Not Found	Not Found	Not Found	Not Found	Not Found
	FALSE	High	[K].GEGPEVDVNLPK.[A]	1xTMT6plex [K12]; 1xTMT6plex [N-Term]		FALSE	3.66787e-05	0	1	3	2	Q09666	Q09666 [1141-1152]; [2258-2269]; [3165-3176]; [3947-3958]; [4075-4086]	0	1711.96	0	1.418	0.964	1.369	1.104					148.1	78.5	104.5	71.1	97.3	100.7								Not Found	Not Found	Not Found	Not Found	Not Found	Not Found	Not Found	Not Found	Not Found	Not Found	High	Not Found
	FALSE	High	[KE].GEGPDVDVNLPK.[A]	1xTMT6plex [N-Term]		FALSE	5.25589e-05	0	1	3	2	Q09666	Q09666 [2781-2792]; [3037-3048]; [3819-3830]; [4203-4214]; [4667-4678]	0	1468.78	0	1.585	0.947	2.296	1.314					158.1	70.6	99.7	53.7	123.4	94.4								Not Found	Not Found	Not Found	Not Found	Not Found	Not Found	Not Found	High	Not Found	Not Found	Not Found	Not Found
	FALSE	High	[K].GEGPDVDVSLPK.[A]	1xTMT6plex [K12]; 1xTMT6plex [N-Term]		FALSE	1.22024e-05	0	1	2	4	Q09666	Q09666 [4795-4806]	0	1670.94	0	1.387	1.05	1.36	1.072	1	1	1	1	146	74.4	105.3	69.4	94.4	110.5	15.45	14.67	0.52	17.33	6.4	5.62		Not Found	Not Found	Not Found	Not Found	Not Found	Not Found	Not Found	Not Found	Not Found	Not Found	High	High
	FALSE	High	[K].GEGPEFDVNLSK.[A]	1xTMT6plex [K12]; 1xTMT6plex [N-Term]		FALSE	6.46674e-06	0	1	2	4	Q09666	Q09666 [1013-1024]	0	1749.94	0	0.976	0.837	0.923	0.84	1	1	1	1	115	81.7	117.7	97.2	89.8	98.6	30.66	5.18	11.6	31.08	8.3	3.17		High	High	Not Found	Not Found	Not Found	Not Found	Not Found	Not Found	Not Found	Not Found	Not Found	Not Found
	FALSE	High	[K].GEGPEVDMNLPK.[A]	1xTMT6plex [K12]; 1xTMT6plex [N-Term]		FALSE	4.54178e-05	0	1	1	2	Q09666	Q09666 [1525-1536]	0	1743.94	0	0.952	0.863	0.846	0.863					111.4	86.1	117.1	99.8	84.5	101.1								Not Found	Not Found	Not Found	Not Found	Not Found	Not Found	Not Found	Not Found	Not Found	Not Found	Not Found	High
	FALSE	High	[K].SEDGVEGDLGETQSR.[T]	1xTMT6plex [N-Term]		FALSE	7.14669e-05	0	1	2	2	Q09666	Q09666 [135-149]	0	1807.85	0	0.658	0.719	0.642	1.15					91.6	110.7	139.3	96.3	61.8	100.2								Not Found	Not Found	Not Found	Not Found	High	Not Found	Not Found	Not Found	Not Found	Not Found	Not Found	Not Found
	FALSE	High	[K].GDVPSVGLEGPDVDLQGPEAK.[I]	1xTMT6plex [K21]; 1xTMT6plex [N-Term]		FALSE	2.36617e-05	0	1	2	2	Q09666	Q09666 [5210-5230]	0	2537.35	0	0.837	0.655	1.17	1.143					108.3	95.7	129.4	83.8	98	84.8								Not Found	Not Found	Not Found	Not Found	Not Found	Not Found	Not Found	Not Found	Not Found	Not Found	High	Not Found
	FALSE	High	[R].LPSGSGAASPTGSAVDIR.[A]	1xTMT6plex [N-Term]		FALSE	1.3605e-06	0	1	2	8	Q09666	Q09666 [208-225]	0	1872	0	1.372	1.225	1.488	1.232	1	1			122.8	92.1	89.5	74.8	111.3	109.6	8.42	57.02	4.59		8.72	7.27		Not Found	Not Found	Not Found	High	High	Not Found	Not Found	Not Found	Not Found	Not Found	Not Found	Not Found
	FALSE	High	[R].LPSGSGAASPTGSAVDIR.[A]	1xPhospho [S/T]; 1xTMT6plex [N-Term]	Q09666 1xPhospho [S/T]	FALSE	1.05727e-07	0	1	2	17	Q09666	Q09666 [208-225]	0	1951.97	0	0.418	0.444	0.37	0.342	1	1	1	1	80.4	48.4	192.2	141.5	52.3	85.3	12.08	17.74	17.07	7.95	23.24	40.14		High	Not Found	Not Found	Not Found	Not Found	Not Found	Not Found	Not Found	Not Found	High	High	High
	FALSE	High	[R].LPSGSGAASPTGSAVDIR.[A]	2xPhospho [S/T]; 1xTMT6plex [N-Term]	Q09666 2xPhospho [S/T]	FALSE	9.15291e-07	0	1	2	16	Q09666	Q09666 [208-225]	0	2031.94	0	1.198	1.316	0.364	0.44	1	1	1	1	138.9	47	116	106.7	38.8	152.7	6.3	16.8	7.02	3.3	10.12	8.16		Not Found	Not Found	Not Found	Not Found	Not Found	Not Found	Not Found	High	High	High	Not Found	Not Found
	FALSE	High	[R].LPSGSGAASPTGSAVDIR.[A]			FALSE	3.66787e-05	0	1	2	2	Q09666	Q09666 [208-225]	0	1642.84	0																					No Quan Labels	Not Found	Not Found	Not Found	Not Found	Not Found	Not Found	High	Not Found	Not Found	Not Found	Not Found	Not Found
	FALSE	High	[K].AEGPEVDVNLPK.[A]	1xTMT6plex [K12]; 1xTMT6plex [N-Term]		FALSE	1.43834e-05	0	1	3	4	Q09666	Q09666 [764-775]; [892-903]; [1727-1738]; [2063-2074]; [2525-2536]; [2909-2920]	0	1725.98	0	1.412	1.023	1.336	0.946	1	1	1	1	147.1	69.8	104.2	73.8	98.6	106.5	7.12	15.96	5.22	9.7	15.36	7.7		Not Found	Not Found	Not Found	Not Found	Not Found	Not Found	Not Found	Not Found	Not Found	Not Found	High	High
	FALSE	High	[K].ADIDVSGPSVDTDAPDLDIEGPEGK.[L]	1xTMT6plex [K25]; 1xTMT6plex [N-Term]		FALSE	2.36957e-06	0	1	1	2	Q09666	Q09666 [1739-1763]	0	2970.48	0	0.67	0.606	0.877	1.326					81.7	133.5	122	100.7	88.3	73.9								Not Found	Not Found	Not Found	Not Found	Not Found	Not Found	Not Found	High	Not Found	Not Found	Not Found	Not Found
	FALSE	High	[K].VNVEAPDVNLEGLGGK.[L]	1xTMT6plex [N-Term]		FALSE	2.70737e-06	0	1	2	2	Q09666	Q09666 [664-679]	0	1840	0	1.045	0.778	2.098	0.987					135.3	56.7	129.4	57.4	120.5	100.7								Not Found	High	Not Found	Not Found	Not Found	Not Found	Not Found	Not Found	Not Found	Not Found	Not Found	Not Found
	FALSE	High	[K].GHYEVTGSDDETGK.[L]	1xPhospho [S8]; 1xTMT6plex [K14]; 1xTMT6plex [N-Term]	Q09666 1xPhospho [S5841]	FALSE	2.77314e-05	0	1	1	7	Q09666	Q09666 [5834-5847]	0	2032.93	0	1.035	0.705	0.462	0.339	1	1	1	1	156.6	34.9	151.3	103	47.6	106.7	6.76	12.75	0.2	3.69	4.11	3.71		Not Found	Not Found	Not Found	Not Found	Not Found	Not Found	High	High	Not Found	Not Found	Not Found	Not Found
	FALSE	High	[K].GHYEVTGSDDETGK.[L]	1xPhospho [S/Y/T]; 1xTMT6plex [K14]; 1xTMT6plex [N-Term]	Q09666 1xPhospho [S/T/Y]	FALSE	6.56035e-06	0	1	1	13	Q09666	Q09666 [5834-5847]	0	1803.76	0	0.845	0.959	0.572	0.3	1	1	1	1	131.9	26	156	86.8	49.7	149.6	23.65	57.61	10.12	21.42	46.86	45.22		Not Found	Not Found	Not Found	Not Found	High	High	High	Not Found	Not Found	Not Found	Not Found	Not Found
	FALSE	High	[K].GGVTGSPEASISGSK.[G]	1xTMT6plex [N-Term]		FALSE	1.73138e-05	0	1	1	2	Q09666	Q09666 [5726-5740]	0	1562.82	0	1.792	1.322	2.842	1.911					164.3	74.1	91.6	38.8	110.1	121.1								Not Found	Not Found	Not Found	Not Found	Not Found	Not Found	Not Found	Not Found	Not Found	High	Not Found	Not Found
	FALSE	High	[K].GGVTGSPEASISGSK.[G]	1xPhospho [S]; 1xTMT6plex [K15]; 1xTMT6plex [N-Term]	Q09666 1xPhospho [S]	FALSE	4.59568e-06	0	1	1	7	Q09666	Q09666 [5726-5740]	0	1642.79	0	0.991	1.818	0.52	0.293	1	1	1	1	75.7	49.9	76.4	170.4	88.7	138.9	28.07	15.25	40.02	26.82	19.96	11.78		Not Found	Not Found	Not Found	Not Found	Not Found	Not Found	High	High	High	Not Found	Not Found	Not Found
	FALSE	High	[K].GGVTGSPEASISGSK.[G]	1xTMT6plex [K15]; 1xTMT6plex [N-Term]		FALSE	8.07969e-06	0	1	1	2	Q09666	Q09666 [5726-5740]	0	1791.99	0	1.435	1.256	0.986	0.829					138.7	71.7	96.6	86.4	85.3	121.3								Not Found	Not Found	High	Not Found	Not Found	Not Found	Not Found	Not Found	Not Found	Not Found	Not Found	Not Found
	FALSE	High	[K].GGVTGSPEASISGSK.[G]	1xPhospho [S]; 1xTMT6plex [K15]; 1xTMT6plex [N-Term]	Q09666 1xPhospho [S]	FALSE	1.17313e-05	0	1	1	8	Q09666	Q09666 [5726-5740]	0	1871.95	0	0.924	1.995	0.31	0.248	1	1	1	1	65.2	51.6	70.5	207.7	64.4	140.7	41.91	32	80.74	44.54	26.14	25.5		Not Found	Not Found	Not Found	Not Found	Not Found	Not Found	Not Found	Not Found	High	High	High	Not Found
	FALSE	High	[K].GGVTGSPEASISGSK.[G]	1xPhospho [S]	Q09666 1xPhospho [S]	FALSE	2.84222e-05	0	1	1	6	Q09666	Q09666 [5726-5740]	0	1413.63	0																					No Quan Labels	Not Found	Not Found	High	High	High	Not Found	Not Found	Not Found	Not Found	Not Found	Not Found	Not Found
	FALSE	High	[R].SNSFSDEREFSGPSTPTGTLEFEGGEVSLEGGK.[V]	1xPhospho [S/T]; 1xTMT6plex [K33]; 1xTMT6plex [N-Term]	Q09666 1xPhospho [S/T]	FALSE	3.71663e-06	0	1	1	22	Q09666	Q09666 [5780-5812]	1	3972.84	0	0.466	0.355	0.445	0.511	1	1	1	1	85.9	69.2	184.1	135.3	60.2	65.3	18.75	57.97	11.57	3.57	15.25	16.35		Not Found	Not Found	Not Found	Not Found	Not Found	Not Found	Not Found	Not Found	High	High	Not Found	Not Found
	FALSE	High	[K].ASLGSLEGEAEAEASSPK.[G]	1xPhospho [S]	Q09666 1xPhospho [S]	FALSE	3.03805e-06	0	1	1	13	Q09666	Q09666 [5748-5765]	0	1812.79	0																					No Quan Labels	High	High	Not Found	High	Not Found	Not Found	Not Found	Not Found	Not Found	Not Found	Not Found	Not Found
	FALSE	High	[K].ASLGSLEGEAEAEASSPK.[G]	1xPhospho [S]; 1xTMT6plex [K18]; 1xTMT6plex [N-Term]	Q09666 1xPhospho [S]	FALSE	2.09641e-06	0	1	1	19	Q09666	Q09666 [5748-5765]	0	2041.95	0	0.468	0.431	0.512	0.34	1	1	1	1	94.3	39.8	201.7	117.2	60	86.9	8.59	8.62	7.8	15.63	9.8	16.35		Not Found	Not Found	Not Found	Not Found	Not Found	High	High	High	High	High	Not Found	Not Found
	FALSE	High	[K].VSVGAPDLSLEASEGSIK.[L]	1xTMT6plex [N-Term]		FALSE	9.39402e-06	0	1	2	2	Q09666	Q09666 [5385-5402]	0	1988.07	0																					No Quan Values	Not Found	High	Not Found	Not Found	Not Found	Not Found	Not Found	Not Found	Not Found	Not Found	Not Found	Not Found
	FALSE	High	[K].ISMPDVDLHLK.[G]	1xTMT6plex [K11]; 1xTMT6plex [N-Term]		FALSE	6.14933e-05	0	1	3	4	Q09666	Q09666 [818-828]; [1195-1205]; [1653-1663]; [1855-1865]; [1922-1932]; [1989-1999]; [2117-2127]	0	1496.83	0	0.974	0.428	3.921	2.406	1	1	1	1	98	117.6	100.7	48.9	191.7	43	5.37	8.9	10.03	6.48	10.09	25.84		Not Found	Not Found	Not Found	Not Found	High	Not Found	Not Found	Not Found	High	Not Found	Not Found	Not Found
	FALSE	High	[K].APDVDVNIAGPDAALK.[V]	1xTMT6plex [K16]; 1xTMT6plex [N-Term]		FALSE	8.60907e-07	0	1	2	6	Q09666	Q09666 [5057-5072]	0	2024.14	0	1.333	1.34	1.23	1.775	1	1	1	1	123.7	114.8	92.8	64.7	79.6	124.4	28.48	78.68	45.48	58.04	21.18	23.85		Not Found	High	High	Not Found	Not Found	Not Found	Not Found	Not Found	Not Found	Not Found	Not Found	Not Found
	FALSE	High	[K].SPQISMSDIDLNLK.[G]	1xOxidation [M6]; 1xTMT6plex [K14]; 1xTMT6plex [N-Term]		FALSE	8.19325e-05	3.96551e-05	1	3	2	Q09666	Q09666 [4516-4529]	0	2035.11	0	1.578	0.906	1.382	0.801					170.5	56.3	108	70.3	97.1	97.9								Not Found	Not Found	Not Found	Not Found	Not Found	High	Not Found	Not Found	Not Found	Not Found	Not Found	Not Found
	FALSE	High	[R].GGVQVPAVDISSSLGGR.[A]	1xTMT6plex [N-Term]		FALSE	0.000102284	3.96551e-05	1	2	2	Q09666	Q09666 [271-287]	0	1828.01	0	1.505	0.692	3.017	1.704					139.5	90.5	92.7	53.1	160.1	64.1								Not Found	Not Found	Not Found	Not Found	Not Found	Not Found	Not Found	High	Not Found	Not Found	Not Found	Not Found
	FALSE	High	[R].EVFSSCSSEVVLSGDDEEYQR.[I-]	1xCarbamidomethyl [C6]; 1xPhospho [S13]; 1xTMT6plex [N-Term]	Q09666 1xPhospho [S115]	FALSE	9.46512e-05	3.96551e-05	1	4	2	Q09666	Q09666 [103-123]	0	2731.16	0																					No Quan Values	Not Found	Not Found	Not Found	Not Found	Not Found	Not Found	Not Found	Not Found	High	Not Found	Not Found	Not Found
	FALSE	High	[K].GDVPSVGLEGPDVDLQGPEAK.[I]	1xTMT6plex [N-Term]		FALSE	7.91492e-05	3.96551e-05	1	2	2	Q09666	Q09666 [5210-5230]	0	2308.19	0	0.988	0.506	1.485	0.963					123.3	80.7	124.7	83.8	124.4	63.2								Not Found	Not Found	Not Found	Not Found	Not Found	Not Found	Not Found	Not Found	High	Not Found	Not Found	Not Found
	FALSE	High	[K].ASLGSLEGEAEAEASSPK.[G]	1xPhospho [S]; 1xTMT6plex [K18]; 1xTMT6plex [N-Term]	Q09666 1xPhospho [S]	FALSE	8.58451e-05	3.96551e-05	1	1	13	Q09666	Q09666 [5748-5765]	0	2271.12	0	0.59	0.498	0.43	0.409	1	1	1	1	100.6	54.3	170.5	132.7	57	85	7.11	12.82	12.85	20.1	2.57	0.93		Not Found	Not Found	Not Found	Not Found	Not Found	Not Found	Not Found	High	High	High	Not Found	Not Found
	FALSE	High	[K].ASLGSLEGEAEAEASSPK.[G]	2xPhospho [S]; 1xTMT6plex [N-Term]; 1xTMT6plex [K18]	Q09666 2xPhospho [S]	FALSE	8.40024e-05	3.96551e-05	1	1	8	Q09666	Q09666 [5748-5765]	0	2121.92	0	0.89	0.659	0.797	0.588	1	1	1	1	153	39.9	171.9	67.8	54	113.3	15.45	41.42	3.33	10.98	8.56	0.14		Not Found	Not Found	Not Found	Not Found	Not Found	High	High	Not Found	Not Found	Not Found	Not Found	Not Found
	FALSE	High	[K].ISMPDVDLHLK.[G]	1xOxidation [M3]		FALSE	0.000111325	3.96551e-05	1	3	2	Q09666	Q09666 [818-828]; [1195-1205]; [1653-1663]; [1855-1865]; [1922-1932]; [1989-1999]; [2117-2127]	0	1283.67	0																					No Quan Labels	Not Found	Not Found	Not Found	Not Found	Not Found	Not Found	Not Found	Not Found	Not Found	Not Found	Not Found	Not Found
	FALSE	High	[K].VSAPGVQGDVK.[G]	1xTMT6plex [K11]; 1xTMT6plex [N-Term]		FALSE	0.000107515	3.96551e-05	1	2	4	Q09666	Q09666 [520-530]	0	1514.89	0	1.575	1.142	1.155	0.872	1	1	1	1	151.5	69.9	96.1	80.2	92.6	109.8	3.4	12.4	9.04	18.08	11.61	1.21		Not Found	Not Found	Not Found	High	High	Not Found	Not Found	Not Found	Not Found	Not Found	Not Found	Not Found
	FALSE	High	[K].VDTNAPDLSLEGPEGK.[L]	1xTMT6plex [N-Term]		FALSE	0.000105029	3.96551e-05	1	2	2	Q09666	Q09666 [1034-1049]	0	1870.96	0	1.362	2.178	0.349	0.486					104.3	66.8	76.6	137.4	47.9	166.9								Not Found	Not Found	Not Found	Not Found	Not Found	Not Found	Not Found	Not Found	High	Not Found	Not Found	Not Found
	FALSE	High	[KN].VDVDVPDVNIEGPDAK.[L]	1xTMT6plex [K16]; 1xTMT6plex [N-Term]		FALSE	8.34813e-05	3.96551e-05	1	2	2	Q09666	Q09666 [3186-3201]; [3638-3653]; [3968-3983]; [4688-4703]	0	2140.15	0	1.012	0.631	1.095	1.06					126.8	90.4	125.2	85.3	93.4	79								Not Found	Not Found	Not Found	Not Found	Not Found	Not Found	Not Found	Not Found	Not Found	Not Found	High	Not Found
	FALSE	High	[K].VDVEVPDVSLEGPEGK.[L]	1xPhospho [S9]	Q09666 1xPhospho [S1298]; 1xPhospho [S3381]; 1xPhospho [S5659]	FALSE	7.99011e-05	3.96551e-05	1	2	2	Q09666	Q09666 [1290-1305]; [2084-2099]; [2279-2294]	0	1748.8	0																					No Quan Labels	Not Found	Not Found	Not Found	Not Found	Not Found	Not Found	Not Found	Not Found	Not Found	Not Found	Not Found	Not Found
	FALSE	High	[K].VDIDAPDVEVHDPDWHLK.[M]	1xTMT6plex [K18]; 1xTMT6plex [N-Term]		FALSE	8.55801e-05	3.96551e-05	1	1	2	Q09666	Q09666 [1694-1711]	0	2558.33	0	1.341	0.836	1.591	1.526					142.9	96.9	106.6	63.5	101	89.1								Not Found	Not Found	Not Found	Not Found	Not Found	Not Found	Not Found	Not Found	Not Found	Not Found	Not Found	High
	FALSE	High	[R].AGAISASGPELQGAGHSK.[L]	1xTMT6plex [N-Term]		FALSE	9.37985e-05	3.96551e-05	1	2	2	Q09666	Q09666 [226-243]	0	1866.99	0	1.818	1.205	1.827	1.384					151.1	87.3	83.1	63.1	115.3	100.1								High	Not Found	Not Found	Not Found	Not Found	Not Found	Not Found	Not Found	Not Found	Not Found	Not Found	Not Found
	FALSE	High	[K].LPTGQISGPEIK.[G]	1xTMT6plex [K12]; 1xTMT6plex [N-Term]		FALSE	0.000116895	3.96551e-05	1	2	4	Q09666	Q09666 [5513-5524]	0	1698.02	0	1.659	1.005	1.473	1.105					161	75.5	97	68.3	100.6	97.5								Not Found	Not Found	Not Found	Not Found	Not Found	Not Found	Not Found	Not Found	Not Found	Not Found	High	Not Found
	FALSE	High	[K].AEGPEVDVNLPK.[A]			FALSE	0.00010909	3.96551e-05	1	3	2	Q09666	Q09666 [764-775]; [892-903]; [1727-1738]; [2063-2074]; [2525-2536]; [2909-2920]	0	1267.65	0																					No Quan Labels	Not Found	Not Found	Not Found	Not Found	Not Found	Not Found	Not Found	Not Found	Not Found	Not Found	Not Found	Not Found
	FALSE	High	[R].LPSGSGAASPTGSAVDIR.[A]	2xPhospho [S/T]	Q09666 2xPhospho [S/T]	FALSE	0.000112617	3.96551e-05	1	2	3	Q09666	Q09666 [208-225]	0	1802.77	0																					No Quan Labels	Not Found	Not Found	Not Found	Not Found	Not Found	High	Not Found	Not Found	Not Found	Not Found	Not Found	Not Found
	FALSE	High	[K].ADIDVSGPK.[V]	1xTMT6plex [K9]; 1xTMT6plex [N-Term]		FALSE	7.91492e-05	3.96551e-05	1	4	12	Q09666	Q09666 [1281-1289]; [2665-2673]; [2793-2801]; [3049-3057]; [3177-3185]; [3831-3839]; [3959-3967]; [4087-4095]; [4215-4223]; [4679-4687]; [4807-4815]	0	1359.79	0	1.469	1.006	1.207	1.091	1	1	1	1	154.1	77.9	104.9	71.4	86.2	105.5	2.23	14.96	8.51	6.1	5.51	5.51		High	High	Not Found	Not Found	Not Found	Not Found	Not Found	Not Found	Not Found	Not Found	Not Found	Not Found
	FALSE	High	[R].LKSEDGVEGDLGETQSR.[T]	1xPhospho [S3]; 1xTMT6plex [K2]; 1xTMT6plex [N-Term]	Q09666 1xPhospho [S135]	FALSE	7.76618e-05	3.96551e-05	1	2	22	Q09666	Q09666 [133-149]	1	2129	0	0.829	0.936	0.519	0.301	1	1	1	0.240363	121	32.5	146	107.8	56	136.7	5.61	19.8	9.72	5.44	10.08	0.84		Not Found	Not Found	Not Found	Not Found	Not Found	High	High	Not Found	Not Found	Not Found	Not Found	Not Found
	FALSE	High	[K].MSLPDVDLDLK.[G]	1xOxidation [M1]; 1xTMT6plex [K11]; 1xTMT6plex [N-Term]		FALSE	0.000125471	7.07462e-05	1	2	1	Q09666	Q09666 [1067-1077]	0	1719.96	0	1.67	1.149	1.069	0.872					164	66.7	98.2	76.4	81.7	112.9								Not Found	Not Found	Not Found	High	Not Found	Not Found	Not Found	Not Found	Not Found	Not Found	Not Found	Not Found
	FALSE	High	[K].GPAFNMASPESDFGINLK.[G]	1xOxidation [M6]; 1xTMT6plex [K18]; 1xTMT6plex [N-Term]		FALSE	0.000126178	7.07462e-05	1	2	2	Q09666	Q09666 [5545-5562]	0	2369.22	0	1.911	0.878	1.463	0.865					195.4	55.3	102.2	63.9	93.5	89.7								Not Found	Not Found	Not Found	Not Found	Not Found	Not Found	Not Found	Not Found	Not Found	High	Not Found	Not Found
	FALSE	High	[K].MDIDAPDVEVQGPDWHLK.[M]	1xTMT6plex [K18]; 1xTMT6plex [N-Term]		FALSE	0.000119588	7.07462e-05	1	1	2	Q09666	Q09666 [1236-1253]	0	2523.3	0	0.796	0.807	1.173	1.262					100.8	99.4	126.5	78.8	92.4	102.1								Not Found	Not Found	High	Not Found	Not Found	Not Found	Not Found	Not Found	Not Found	Not Found	Not Found	Not Found
	FALSE	High	[K].VGVEVPDVNIEGPEGK.[L]	1xTMT6plex [K16]; 1xTMT6plex [N-Term]		FALSE	0.000131586	7.07462e-05	1	2	2	Q09666	Q09666 [913-928]	0	2096.16	0	1.243	0.808	1.421	1.186					146.1	79.3	117.6	66.9	95.1	95								Not Found	High	Not Found	Not Found	Not Found	Not Found	Not Found	Not Found	Not Found	Not Found	Not Found	Not Found
	FALSE	High	[K].VSGPDLDLNLK.[G]	1xTMT6plex [N-Term]		FALSE	0.000119928	7.07462e-05	1	2	2	Q09666	Q09666 [5297-5307]	0	1399.8	0	1.362	0.948	1.669	0.912					155.6	56.5	114.3	61.9	103.4	108.3								Not Found	Not Found	Not Found	High	Not Found	Not Found	Not Found	Not Found	Not Found	Not Found	Not Found	Not Found
	FALSE	High	[K].GDVDVSGPK.[L]	1xTMT6plex [K9]; 1xTMT6plex [N-Term]		FALSE	0.000125119	7.07462e-05	1	1	2	Q09666	Q09666 [3309-3317]	0	1331.76	0	1.271	0.875	1.358	1.235					134.7	91.6	106	74.2	100.7	92.8								Not Found	Not Found	Not Found	Not Found	Not Found	Not Found	Not Found	Not Found	Not Found	Not Found	High	Not Found
	FALSE	High	[K].ISIPDVGLHLK.[G]	1xTMT6plex [K11]; 1xTMT6plex [N-Term]		FALSE	0.000131586	7.07462e-05	1	1	2	Q09666	Q09666 [1451-1461]	0	1650.04	0	1.446	0.538	3.074	2.008					133.9	106.8	92.6	53.2	163.5	49.8								Not Found	Not Found	Not Found	Not Found	Not Found	Not Found	High	Not Found	Not Found	Not Found	Not Found	Not Found
	FALSE	High	[K].VSVGAPDLSLEASEGSIK.[L]	1xTMT6plex [K18]; 1xTMT6plex [N-Term]		FALSE	0.000126178	7.07462e-05	1	2	2	Q09666	Q09666 [5385-5402]	0	2217.24	0	3.491	1.1	7.35	6.541					238.3	95.9	68.3	14.7	107.8	75.1								Not Found	Not Found	Not Found	Not Found	High	Not Found	Not Found	Not Found	Not Found	Not Found	Not Found	Not Found
	FALSE	High	[K].VTAPDVDLHLK.[A]	1xTMT6plex [N-Term]		FALSE	0.000129763	7.07462e-05	1	2	2	Q09666	Q09666 [4916-4926]	0	1436.83	0	1.347	0.863	1.393	0.717					145.4	58.5	107.9	81.5	113.6	93.1								Not Found	Not Found	High	Not Found	Not Found	Not Found	Not Found	Not Found	Not Found	Not Found	Not Found	Not Found
	FALSE	High	[K].IDVDAPDIDIHGPDAK.[L]	1xTMT6plex [K16]; 1xTMT6plex [N-Term]		FALSE	0.000127245	7.07462e-05	1	1	4	Q09666	Q09666 [3260-3275]	0	2149.15	0	1.198	0.845	0.991	1.029	1	1	1	1	133.7	88.7	111.6	86.2	85.5	94.3	8.23	21.02	6.32	21.93	17.51	5.1		Not Found	Not Found	Not Found	Not Found	Not Found	Not Found	Not Found	Not Found	Not Found	Not Found	High	High
	FALSE	High	[K].DIDISSPEFK.[I]	1xTMT6plex [K10]; 1xTMT6plex [N-Term]		FALSE	0.000130126	7.07462e-05	1	2	6	Q09666	Q09666 [172-181]	0	1608.89	0	0.672	0.583	0.825	1.157	1	1	1	1	93.3	111.2	139	96.1	79.3	81.1	16.18	13.4	9	4.07	5.08	15.79		Not Found	High	High	Not Found	Not Found	Not Found	Not Found	Not Found	Not Found	Not Found	Not Found	Not Found
	FALSE	High	[K].VGIDTPDIDIHGPEGK.[L]	1xTMT6plex [K16]; 1xTMT6plex [N-Term]		FALSE	0.000142602	0.000104443	1	3	2	Q09666	Q09666 [4560-4575]	0	2121.16	0	1.275	0.813	1.265	0.951					147.6	71.8	115.8	75.4	95.4	94.1								Not Found	High	Not Found	Not Found	Not Found	Not Found	Not Found	Not Found	Not Found	Not Found	Not Found	Not Found
	FALSE	High	[K].LEGGEVDLK.[G]	1xTMT6plex [K9]; 1xTMT6plex [N-Term]		FALSE	0.000186278	0.000118124	1	2	2	Q09666	Q09666 [4937-4945]	0	1417.83	0	1.651	1.029	1.257	1.019					164.2	72.8	99.5	71.4	89.8	102.3								High	Not Found	Not Found	Not Found	Not Found	Not Found	Not Found	Not Found	Not Found	Not Found	Not Found	Not Found
	FALSE	High	[K].ISMPDVDLHLK.[G]	1xOxidation [M3]; 1xTMT6plex [N-Term]; 1xTMT6plex [K11]		FALSE	0.000160518	0.000118124	1	3	6	Q09666	Q09666 [818-828]; [1195-1205]; [1653-1663]; [1855-1865]; [1922-1932]; [1989-1999]; [2117-2127]	0	1512.83	0	2.029	1.253	1.522	0.645	1	1	1	1	190.5	40.3	93.9	62.5	95.2	117.6	2.75	38.83	4.39	7.2	2.84	14.37		Not Found	Not Found	High	Not Found	Not Found	Not Found	Not Found	Not Found	Not Found	Not Found	Not Found	High
	FALSE	High	[K].ISMPDVDLHLK.[G]	1xTMT6plex [K11]; 1xTMT6plex [N-Term]		FALSE	0.000182577	0.000118124	1	3	4	Q09666	Q09666 [818-828]; [1195-1205]; [1653-1663]; [1855-1865]; [1922-1932]; [1989-1999]; [2117-2127]	0	1726	0	0.826	0.338	2.788	2.355					97.3	132.3	117.8	56.2	156.6	39.8								High	Not Found	Not Found	Not Found	Not Found	Not Found	Not Found	Not Found	Not Found	Not Found	Not Found	Not Found
	FALSE	High	[K].APDVDVNIAGPDAALK.[V]	1xTMT6plex [N-Term]		FALSE	0.000160962	0.000118124	1	2	2	Q09666	Q09666 [5057-5072]	0	1794.98	0	1.701	1.084	2.283	0.909					160.1	52.8	94.2	58.1	132.7	102.1								Not Found	Not Found	Not Found	Not Found	Not Found	Not Found	Not Found	Not Found	Not Found	Not Found	High	Not Found
	FALSE	High	[K].VQANLGAPDINIEGLDAK.[V]	1xTMT6plex [K18]; 1xTMT6plex [N-Term]		FALSE	0.000151087	0.000118124	1	2	2	Q09666	Q09666 [5164-5181]	0	2296.29	0	1.374	0.65	1.945	1.449					145	92.6	105.5	63.9	124.3	68.6								Not Found	Not Found	Not Found	Not Found	Not Found	High	Not Found	Not Found	Not Found	Not Found	Not Found	Not Found
	FALSE	High	[R].LSSSSSNDSGNK.[V]	1xPhospho [S6]; 1xTMT6plex [K12]; 1xTMT6plex [N-Term]	Q09666 1xPhospho [S5867]	FALSE	0.000182057	0.000118124	1	1	2	Q09666	Q09666 [5862-5873]	0	1720.82	0	0.287	0.236	0.407	0.071					100.5	3.2	350.3	45	18.3	82.7								Not Found	Not Found	Not Found	Not Found	Not Found	Not Found	Not Found	Not Found	Not Found	Not Found	Not Found	High
	FALSE	High	[R].LSSSSSNDSGNK.[V]	1xTMT6plex [N-Term]		FALSE	0.000155299	0.000118124	1	1	2	Q09666	Q09666 [5862-5873]	0	1411.69	0	0.242	0.155	1.327	0.27					76.3	16.6	315.5	61.4	81.4	48.9								Not Found	Not Found	Not Found	Not Found	Not Found	Not Found	Not Found	Not Found	Not Found	Not Found	Not Found	High
	FALSE	High	[K].ADIEISGPK.[V]	1xTMT6plex [K9]; 1xTMT6plex [N-Term]		FALSE	0.000162302	0.000118124	1	3	2	Q09666	Q09666 [4343-4351]	0	1387.82	0	1.338	0.88	1.187	0.827					151.8	64.5	113.4	78	92.5	99.8								Not Found	Not Found	High	Not Found	Not Found	Not Found	Not Found	Not Found	Not Found	Not Found	Not Found	Not Found
	FALSE	High	[K].ADVVVSGPK.[V]	1xTMT6plex [K9]; 1xTMT6plex [N-Term]		FALSE	0.000181538	0.000118124	1	2	2	Q09666	Q09666 [1153-1161]; [2075-2083]	0	1329.81	0	1.735	1.03	1.658	1.253					163.2	78.7	94.1	62.8	104.2	96.9								Not Found	Not Found	Not Found	Not Found	Not Found	High	Not Found	Not Found	Not Found	Not Found	Not Found	Not Found
	FALSE	High	[R].LPSGSGAASPTGSAVDIR.[A]	1xPhospho [T/S]	Q09666 1xPhospho [S/T]	FALSE	0.000154447	0.000118124	1	2	8	Q09666	Q09666 [208-225]	0	1722.81	0																					No Quan Labels	Not Found	Not Found	Not Found	Not Found	Not Found	Not Found	High	Not Found	Not Found	Not Found	Not Found	Not Found
	FALSE	High	[K].GDVDISLPK.[VL]	1xTMT6plex [K9]; 1xTMT6plex [N-Term]		FALSE	0.000184679	0.000118124	1	1	4	Q09666	Q09666 [2979-2987]; [3559-3567]	0	1401.84	0	1.423	0.878	1.368	1.042	1	1	1	1	153	74.8	107.6	71.8	98.2	94.5	7.64	10.8	12.7	14.26	11.31	19.05		Not Found	Not Found	Not Found	High	High	Not Found	Not Found	Not Found	Not Found	Not Found	Not Found	Not Found
	FALSE	High	[K].GDVDVSAPK.[L]	1xTMT6plex [K9]; 1xTMT6plex [N-Term]		FALSE	0.000154872	0.000118124	1	2	2	Q09666	Q09666 [2328-2336]	0	1345.77	0	1.181	1.088	1.152	1.135					119.4	93.1	101.1	82	94.4	110								Not Found	Not Found	Not Found	Not Found	Not Found	Not Found	Not Found	Not Found	Not Found	Not Found	High	Not Found
	FALSE	High	[K].GDVDVSVPK.[VL]	1xTMT6plex [K9]; 1xTMT6plex [N-Term]		FALSE	0.000190087	0.000118124	1	2	2	Q09666	Q09666 [1211-1219]; [1938-1946]	0	1373.8	0	1.553	0.884	1.486	1.186					160.4	79.1	103.3	66.7	99.1	91.3								High	Not Found	Not Found	Not Found	Not Found	Not Found	Not Found	Not Found	Not Found	Not Found	Not Found	Not Found
	FALSE	High	[KE].GEGPDVDVNLPK.[A]	1xTMT6plex [K12]; 1xTMT6plex [N-Term]		FALSE	0.000177967	0.000118124	1	3	2	Q09666	Q09666 [2781-2792]; [3037-3048]; [3819-3830]; [4203-4214]; [4667-4678]	0	1697.95	0	1.371	1.015	1.251	1.082					142.4	80.7	103.8	74.6	93.2	105.3								Not Found	Not Found	Not Found	Not Found	Not Found	Not Found	Not Found	Not Found	Not Found	Not Found	High	Not Found
	FALSE	High	[K].TDVDVSLPK.[V]	1xTMT6plex [K9]; 1xTMT6plex [N-Term]		FALSE	0.000183099	0.000118124	1	1	4	Q09666	Q09666 [1595-1603]	0	1431.85	0	1.384	0.912	1.279	0.971	1	1	1	1	152.6	70.7	110.3	72.8	93.1	100.6	7.17	9.46	1.55	14.84	11.6	5.91		Not Found	Not Found	High	High	Not Found	Not Found	Not Found	Not Found	Not Found	Not Found	Not Found	Not Found
	FALSE	High	[K].GDMDVSVPK.[V]	1xTMT6plex [K9]; 1xTMT6plex [N-Term]		FALSE	0.000171578	0.000118124	1	2	2	Q09666	Q09666 [1669-1677]; [2005-2013]; [2200-2208]	0	1405.78	0	1.368	0.793	1.598	1.435					147.9	92	108.1	64.1	102.4	85.7								Not Found	High	Not Found	Not Found	Not Found	Not Found	Not Found	Not Found	Not Found	Not Found	Not Found	Not Found
	FALSE	High	[K].GPQVSSALNLDTSK.[F]	1xTMT6plex [N-Term]		FALSE	0.000156586	0.000118124	1	2	4	Q09666	Q09666 [5599-5612]	0	1645.9	0																					No Quan Values	Not Found	Not Found	Not Found	High	High	Not Found	Not Found	Not Found	Not Found	Not Found	Not Found	Not Found
	FALSE	High	[K].KPDIDITGPK.[V]	2xTMT6plex [K1; K10]; 1xTMT6plex [N-Term]		FALSE	0.000172058	0.000118124	1	1	1	Q09666	Q09666 [3375-3384]	0	1771.09	0	1.462	0.944	1.445	1.467					152.4	91.9	104.2	62.6	90.5	98.4								Not Found	Not Found	Not Found	Not Found	Not Found	Not Found	Not Found	Not Found	Not Found	Not Found	Not Found	High
	FALSE	High	[K].GPEVDVSGPK.[L]	1xTMT6plex [K10]; 1xTMT6plex [N-Term]		FALSE	0.000168259	0.000118124	1	1	2	Q09666	Q09666 [3331-3340]	0	1442.83	0	1.337	1.378	0.6	0.656					133	67.1	99.5	102.2	61.3	137								Not Found	Not Found	Not Found	Not Found	Not Found	Not Found	Not Found	Not Found	Not Found	Not Found	Not Found	High
	FALSE	High	[K].VDIDAPDVDVHGPDWHLK.[M]	1xTMT6plex [K18]; 1xTMT6plex [N-Term]		FALSE	0.000168259	0.000118124	1	5	2	Q09666	Q09666 [731-748]; [2225-2242]; [2748-2765]; [4042-4059]; [4298-4315]	0	2486.31	0	0.974	0.601	1.516	1.306					122.8	94.1	126.1	72	109.2	75.8								Not Found	Not Found	High	Not Found	Not Found	Not Found	Not Found	Not Found	Not Found	Not Found	Not Found	Not Found
	FALSE	High	[K].VDIDVPDVNIEGPEGK.[L]	1xTMT6plex [K16]; 1xTMT6plex [N-Term]		FALSE	0.000161407	0.000118124	1	1	4	Q09666	Q09666 [3058-3073]; [3840-3855]	0	2154.17	1	0.979	0.694	1.052	1.001	1	1	1	1	123	86.6	125.6	86.5	91.1	87.2	1.63	4.49	0.94	3.21	12.99	2.33		High	Not Found	Not Found	Not Found	Not Found	Not Found	Not Found	Not Found	Not Found	Not Found	Not Found	High
	FALSE	High	[K].ISMPDVDLHVK.[G]	1xTMT6plex [K11]; 1xTMT6plex [N-Term]		FALSE	0.000204688	0.000137039	1	2	2	Q09666	Q09666 [697-707]	0	1711.98	0	0.949	0.507	2.527	2.067					99.6	126.5	104.9	61.2	154.6	53.2								Not Found	Not Found	Not Found	Not Found	Not Found	Not Found	Not Found	Not Found	Not Found	Not Found	High	Not Found
	FALSE	High	[K].GDADVSVPK.[L]	1xTMT6plex [K9]; 1xTMT6plex [N-Term]		FALSE	0.000207816	0.000137039	1	1	2	Q09666	Q09666 [1871-1879]	0	1345.77	0	1.21	0.84	1.415	1.28					132.4	92.2	109.4	72.1	102	91.9								Not Found	Not Found	Not Found	Not Found	Not Found	Not Found	Not Found	Not Found	Not Found	Not Found	High	Not Found
	FALSE	High	[R].ISAPNVDFNLEGPK.[V]	1xPhospho [S2]; 1xTMT6plex [N-Term]	Q09666 1xPhospho [S5448]	FALSE	0.000196309	0.000137039	1	2	2	Q09666	Q09666 [5447-5460]	0	1809.9	0	0.38	0.381	0.398	0.16					79.7	23.7	209.7	148.2	58.9	79.8								High	Not Found	Not Found	Not Found	Not Found	Not Found	Not Found	Not Found	Not Found	Not Found	Not Found	Not Found
	FALSE	High	[K].GDMDVSLPK.[V]	1xTMT6plex [K9]; 1xTMT6plex [N-Term]		FALSE	0.000224688	0.000137039	1	1	2	Q09666	Q09666 [3107-3115]; [3889-3897]	0	1419.79	0	1.196	0.93	1.118	1.282					122.6	105.4	102.5	82.2	91.9	95.3								Not Found	Not Found	High	Not Found	Not Found	Not Found	Not Found	Not Found	Not Found	Not Found	Not Found	Not Found
	FALSE	High	[K].VDIDVPDVNLEAPEGK.[L]	1xTMT6plex [K16]; 1xTMT6plex [N-Term]		FALSE	0.000202238	0.000137039	1	1	4	Q09666	Q09666 [1546-1561]	0	2168.19	0	1.033	0.655	1.224	1.127					131.4	86.8	127.2	77	94.2	83.3								High	Not Found	Not Found	Not Found	Not Found	Not Found	Not Found	Not Found	Not Found	Not Found	Not Found	Not Found
	FALSE	High	[K].VDIEAPDVSLEGPEGK.[L]	1xPhospho [S9]; 1xTMT6plex [K16]; 1xTMT6plex [N-Term]	Q09666 1xPhospho [S1170]	FALSE	0.000222546	0.000137039	1	1	2	Q09666	Q09666 [1162-1177]	0	2193.11	0	0.624	0.745	0.354	0.381					101.3	47.3	162.4	124.1	44	120.9								Not Found	Not Found	Not Found	Not Found	Not Found	Not Found	Not Found	Not Found	High	Not Found	Not Found	Not Found
	FALSE	High	[K].MDVNVGDIDIEGPEGK.[L]	1xOxidation [M1]; 1xTMT6plex [K16]; 1xTMT6plex [N-Term]		FALSE	0.000202846	0.000137039	1	1	1	Q09666	Q09666 [1620-1635]	0	2162.11	1	1.048	0.936	0.681	0.734					122.8	76.1	117.2	103.7	70.6	109.6								Not Found	Not Found	Not Found	Not Found	Not Found	Not Found	Not Found	Not Found	High	Not Found	Not Found	Not Found
	FALSE	High	[R].VSAPEVSVGHK.[G]	1xTMT6plex [K11]; 1xTMT6plex [N-Term]		FALSE	0.000205307	0.000137039	1	2	2	Q09666	Q09666 [331-341]	0	1567.92	0	1.726	0.693	2.186	1.215					182.6	65.8	105.8	54.2	118.4	73.4								Not Found	Not Found	Not Found	Not Found	Not Found	High	Not Found	Not Found	Not Found	Not Found	Not Found	Not Found
	FALSE	High	[K].GSLGATGEIK.[G]	1xTMT6plex [K10]; 1xTMT6plex [N-Term]		FALSE	0.000415033	0.000146789	1	2	2	Q09666	Q09666 [5463-5472]	0	1161.67	0	2.252	1.798	1.698	1.542					170.7	79	75.8	51.2	87	136.3								Not Found	Not Found	Not Found	Not Found	Not Found	Not Found	Not Found	Not Found	Not Found	Not Found	Not Found	High
	FALSE	High	[K].MSLPDVDLDLK.[G]	1xTMT6plex [N-Term]		FALSE	0.000417086	0.000146789	1	2	2	Q09666	Q09666 [1067-1077]	0	1474.8	0	1.017	0.693	2.833	1.629					97.3	101.7	95.6	62.4	176.8	66.2								Not Found	Not Found	Not Found	Not Found	Not Found	High	Not Found	Not Found	Not Found	Not Found	Not Found	Not Found
	FALSE	High	[K].MPSLEISAPK.[V]	1xPhospho [S3]; 1xTMT6plex [K10]; 1xTMT6plex [N-Term]	Q09666 1xPhospho [S4908]	FALSE	0.000399176	0.000146789	1	2	2	Q09666	Q09666 [4906-4915]	0	1610.86	0	0.459	0.485	0.447	0.879					69.6	115.3	151.8	131.2	58.7	73.5								Not Found	Not Found	Not Found	Not Found	Not Found	High	Not Found	Not Found	Not Found	Not Found	Not Found	Not Found
	FALSE	High	[K].LNVGAPDVTLR.[G]	1xTMT6plex [N-Term]		FALSE	0.00045462	0.000146789	1	2	2	Q09666	Q09666 [5356-5366]	0	1383.82	0	1.773	0.866	2.012	1.217					160	78.2	90.2	64.2	129.2	78.2								Not Found	Not Found	Not Found	Not Found	Not Found	Not Found	Not Found	High	Not Found	Not Found	Not Found	Not Found
	FALSE	High	[K].IDVTAPDVSIEEPEGK.[L]	1xTMT6plex [N-Term]		FALSE	0.000350822	0.000146789	1	2	2	Q09666	Q09666 [785-800]	0	1928.01	0	0.698	0.967	0.692	0.658					86.5	75.5	123.9	114.8	79.5	119.8								Not Found	Not Found	Not Found	Not Found	Not Found	Not Found	Not Found	Not Found	Not Found	High	Not Found	Not Found
	FALSE	High	[K].GGVDVTLPR.[V]	1xTMT6plex [N-Term]		FALSE	0.000429755	0.000146789	1	2	4	Q09666	Q09666 [585-593]	0	1142.67	0	1.477	0.984	1.536	0.939	1	1	1	1	155.3	63.8	105.2	67.9	104.4	103.5	6.62	0.02	2.61	13.96	2.97	6.36		High	High	Not Found	Not Found	Not Found	Not Found	Not Found	Not Found	Not Found	Not Found	Not Found	Not Found
	FALSE	High	[K].IEGEMQVPDVDIR.[G]	1xOxidation [M5]; 1xTMT6plex [N-Term]		FALSE	0.00025516	0.000146789	1	1	2	Q09666	Q09666 [1092-1104]	0	1745.89	0	1.585	1.073	1.392	0.704					161.3	51.8	101.7	73.6	102.5	109.1								Not Found	Not Found	Not Found	Not Found	Not Found	Not Found	Not Found	High	Not Found	Not Found	Not Found	Not Found
	FALSE	High	[K].GPSLDIDTPDVNIEGPEGK.[L]	1xTMT6plex [K19]; 1xTMT6plex [N-Term]		FALSE	0.000370282	0.000146789	1	3	2	Q09666	Q09666 [4423-4441]	0	2411.27	0	1.013	0.733	0.895	1.008					120.4	95	118.9	94.2	84.4	87.1								Not Found	Not Found	Not Found	Not Found	Not Found	Not Found	Not Found	Not Found	Not Found	Not Found	High	Not Found
	FALSE	High	[R].ISAPNVDFNLEGPK.[V]			FALSE	0.000366914	0.000146789	1	2	2	Q09666	Q09666 [5447-5460]	0	1500.77	0																					No Quan Labels	Not Found	Not Found	Not Found	Not Found	Not Found	Not Found	Not Found	Not Found	Not Found	Not Found	High	Not Found
	FALSE	High	[K].GPRISAPNVDFNLEGPK.[V]	1xPhospho [S5]; 1xTMT6plex [N-Term]	Q09666 1xPhospho [S5448]	FALSE	0.000309078	0.000146789	1	2	2	Q09666	Q09666 [5444-5460]	1	2120.07	0	0.268	0.475	0.446	0.308					50.8	47.4	189.4	153.9	68.6	89.9								Not Found	High	Not Found	Not Found	Not Found	Not Found	Not Found	Not Found	Not Found	Not Found	Not Found	Not Found
	FALSE	High	[K].GDVDVTLPK.[V]	1xTMT6plex [K9]; 1xTMT6plex [N-Term]		FALSE	0.000238299	0.000146789	1	2	2	Q09666	Q09666 [4737-4745]	0	1401.84	0	1.291	0.839	1.247	0.968					149.1	71.8	115.5	74.2	92.5	96.9								Not Found	Not Found	High	Not Found	Not Found	Not Found	Not Found	Not Found	Not Found	Not Found	Not Found	Not Found
	FALSE	High	[K].GDVDVSLPK.[VML]	1xTMT6plex [K9]; 1xTMT6plex [N-Term]		FALSE	0.00031803	0.000146789	1	4	8	Q09666	Q09666 [2133-2141]; [2595-2603]; [2723-2731]; [3761-3769]; [4017-4025]; [4145-4153]; [4273-4281]; [4401-4409]; [4475-4483]	0	1387.82	0	1.065	0.849	0.805	0.747	1	1	1	1	125.6	75.1	117.9	100.5	80.9	100.1	15	19.73	10.83	38	14.97	15.12		Not Found	High	High	Not Found	High	Not Found	Not Found	Not Found	Not Found	Not Found	Not Found	Not Found
	FALSE	High	[K].GDINIEGPSMNIEGPDLNVEGPEGGLK.[G]	1xOxidation [M10]; 1xTMT6plex [K27]; 1xTMT6plex [N-Term]		FALSE	0.000266297	0.000146789	1	1	2	Q09666	Q09666 [3501-3527]	0	3225.63	0	1.115	0.76	0.937	0.662					138.5	61.8	124.3	93.4	87.6	94.4								Not Found	Not Found	Not Found	Not Found	Not Found	Not Found	Not Found	Not Found	Not Found	Not Found	High	Not Found
	FALSE	High	[K].LQGSGVSLASK.[K]	1xPhospho [S4]; 1xTMT6plex [K11]; 1xTMT6plex [N-Term]	Q09666 1xPhospho [S5851]	FALSE	0.000481805	0.000146789	1	1	2	Q09666	Q09666 [5848-5858]	0	1584.88	0	0.388	0.335	0.766	0.353					95.2	29.6	245.2	83.8	64.2	82.2								Not Found	Not Found	Not Found	Not Found	Not Found	High	Not Found	Not Found	Not Found	Not Found	Not Found	Not Found
	FALSE	High	[K].GNVDISAPK.[I]	1xTMT6plex [K9]; 1xTMT6plex [N-Term]		FALSE	0.000258781	0.000146789	1	1	2	Q09666	Q09666 [1083-1091]	0	1358.8	0	1.477	1.068	1.569	1.051					149.9	69.7	101.5	66.3	104	108.5								Not Found	Not Found	Not Found	Not Found	High	Not Found	Not Found	Not Found	Not Found	Not Found	Not Found	Not Found
	FALSE	High	[K].ISMPEVDLNLK.[G]	1xOxidation [M3]; 1xTMT6plex [K11]; 1xTMT6plex [N-Term]		FALSE	0.0003807	0.000146789	1	3	4	Q09666	Q09666 [4129-4139]; [4593-4603]	0	1732.99	0	1.578	0.906	1.798	1.215	1	1	1	1	142.9	86.1	90.6	70.9	127.4	82.1	48.45	52.21	5.88	8.54	29.77	29.62		High	Not Found	Not Found	Not Found	Not Found	Not Found	High	Not Found	Not Found	Not Found	Not Found	Not Found
	FALSE	High	[K].ISMPDIDLNLK.[G]	1xOxidation [M3]		FALSE	0.000476679	0.000146789	1	2	4	Q09666	Q09666 [2707-2717]; [3091-3101]; [3219-3229]; [3543-3553]; [3745-3755]; [3873-3883]; [4721-4731]	0	1274.67	0																					No Quan Labels	Not Found	Not Found	Not Found	Not Found	Not Found	Not Found	Not Found	Not Found	High	Not Found	Not Found	Not Found
	FALSE	High	[K].ISIPDVDLDLK.[G]	1xTMT6plex [N-Term]		FALSE	0.000438543	0.000146789	1	2	2	Q09666	Q09666 [4849-4859]	0	1456.85	0	1.162	0.713	2.705	1.341					126.2	76.5	108.6	57	154.3	77.4								Not Found	Not Found	Not Found	Not Found	Not Found	Not Found	High	Not Found	Not Found	Not Found	Not Found	Not Found
	FALSE	High	[K].ISMQDVDLSLGSPK.[L]	1xPhospho [S12]; 1xTMT6plex [K14]; 1xTMT6plex [N-Term]	Q09666 1xPhospho [S511]	FALSE	0.000387919	0.000146789	1	2	2	Q09666	Q09666 [500-513]	0	2028.05	0	0.178	0.159	0.63	0.722					32.7	108.8	183.5	150.8	95	29.1								Not Found	Not Found	Not Found	Not Found	Not Found	High	Not Found	Not Found	Not Found	Not Found	Not Found	Not Found
	FALSE	High	[K].GEVDVDVPK.[L]	1xTMT6plex [K9]; 1xTMT6plex [N-Term]		FALSE	0.00027119	0.000146789	1	2	3	Q09666	Q09666 [2402-2410]	0	1415.81	2	1.172	0.849	1.427	1.111	1	1	1	1	129.1	83.9	110.2	75.5	107.7	93.6	3.57	13.93	11.07	2.87	1.27	5.25		Not Found	Not Found	Not Found	Not Found	Not Found	Not Found	Not Found	Not Found	High	High	Not Found	Not Found
	FALSE	High	[K].MDVNVGDIDIEGPEGK.[L]	1xTMT6plex [K16]; 1xTMT6plex [N-Term]		FALSE	0.000264383	0.000146789	1	1	2	Q09666	Q09666 [1620-1635]	0	2146.11	0	0.677	0.467	1.011	1.356					93.3	122.7	137.8	90.5	91.5	64.3								Not Found	Not Found	Not Found	Not Found	Not Found	Not Found	Not Found	Not Found	Not Found	Not Found	Not Found	High
	FALSE	High	[K].SSGCDVNLPGVNVK.[L]	1xCarbamidomethyl [C4]; 1xTMT6plex [K14]; 1xTMT6plex [N-Term]		FALSE	0.000479232	0.000146789	1	2	2	Q09666	Q09666 [5499-5512]	0	1904.03	0	1.378	0.801	1.51	1.224					149.1	84	108.2	68.6	103.6	86.6								Not Found	Not Found	Not Found	Not Found	Not Found	High	Not Found	Not Found	Not Found	Not Found	Not Found	Not Found
	FALSE	High	[R].SNSFSDEREFSGPSTPTGTLEFEGGEVSLEGGK.[V]	1xPhospho [S]	Q09666 1xPhospho [S]	FALSE	0.00032882	0.000146789	1	1	4	Q09666	Q09666 [5780-5812]	1	3514.52	0																					No Quan Labels	Not Found	Not Found	Not Found	Not Found	Not Found	Not Found	Not Found	Not Found	Not Found	Not Found	Not Found	Not Found
	FALSE	High	[R].VTAYTVDVTGR.[E]	1xTMT6plex [N-Term]		FALSE	0.000228334	0.000146789	1	2	4	Q09666	Q09666 [157-167]	0	1410.78	0	1.654	1.116	1.803	1.121	1	1	1	1	159.1	67.8	96.2	60.5	109.1	107.3	8.17	0.47	4.29	24.01	14.89	17.62		Not Found	Not Found	Not Found	Not Found	High	High	Not Found	Not Found	Not Found	Not Found	Not Found	Not Found
	FALSE	High	[K].VSVGAPDLSLEASEGSIK.[L]	1xPhospho [S16]; 1xTMT6plex [K18]; 1xTMT6plex [N-Term]	Q09666 1xPhospho [S5400]	FALSE	0.000279352	0.000146789	1	2	2	Q09666	Q09666 [5385-5402]	0	2297.2	0	0.281	0.36	0.35	0.43					50.3	73.9	179.1	172	60.3	64.5								High	Not Found	Not Found	Not Found	Not Found	Not Found	Not Found	Not Found	Not Found	Not Found	Not Found	Not Found
	FALSE	High	[K].ADLGVSGPK.[V]	1xTMT6plex [K9]; 1xTMT6plex [N-Term]		FALSE	0.000466675	0.000146789	1	1	2	Q09666	Q09666 [1537-1545]	0	1301.78	0	1.515	1.029	1.474	1.344					143.3	93.2	94.6	69.3	102.2	97.3								Not Found	Not Found	Not Found	Not Found	Not Found	High	Not Found	Not Found	Not Found	Not Found	Not Found	Not Found
	FALSE	High	[K].AEGPDVAVDLPK.[G]	1xTMT6plex [K12]; 1xTMT6plex [N-Term]		FALSE	0.00033303	0.000146789	1	1	4	Q09666	Q09666 [3489-3500]	0	1668.96	0	1.68	1.192	1.159	0.851	1	1	1	1	158.6	66.3	94.4	77.9	90.3	112.5	9.92	13.29	6.38	11.06	8.5	10.64		Not Found	Not Found	Not Found	Not Found	Not Found	Not Found	Not Found	Not Found	Not Found	Not Found	High	High
	FALSE	High	[K].VDINTPDVDVHGPDWHLK.[M]	1xPhospho [T5]; 1xTMT6plex [K18]; 1xTMT6plex [N-Term]	Q09666 1xPhospho [T4766]	FALSE	0.000334453	0.000146789	1	2	2	Q09666	Q09666 [4762-4779]	0	2595.3	0	0.368	0.403	0.84	0.576					75.6	56.3	205.5	97.7	82.1	82.8								Not Found	High	Not Found	Not Found	Not Found	Not Found	Not Found	Not Found	Not Found	Not Found	Not Found	Not Found
	FALSE	High	[K].VDINAPDVEVQGK.[V]			FALSE	0.00031033	0.000146789	1	1	2	Q09666	Q09666 [3385-3397]	0	1383.71	0																					No Quan Labels	Not Found	Not Found	Not Found	Not Found	Not Found	Not Found	High	Not Found	Not Found	Not Found	Not Found	Not Found
	FALSE	High	[K].VDINAPDVEVHGPDWHLK.[M]	1xTMT6plex [K18]; 1xTMT6plex [N-Term]		FALSE	0.00032067	0.000146789	1	1	2	Q09666	Q09666 [1492-1509]	0	2499.34	0	0.893	0.491	1.16	1.09					114.2	99	127.9	90.8	105.4	62.8								Not Found	Not Found	Not Found	Not Found	High	Not Found	Not Found	Not Found	Not Found	Not Found	Not Found	Not Found
	FALSE	High	[K].VDINAPDVDVQGPDWHLK.[M]	1xTMT6plex [N-Term]		FALSE	0.000395365	0.000146789	1	1	2	Q09666	Q09666 [3132-3149]; [3786-3803]	0	2247.16	0	1.137	0.982	1.241	0.973					115	86.1	101.1	88.5	109.9	99.3								High	Not Found	Not Found	Not Found	Not Found	Not Found	Not Found	Not Found	Not Found	Not Found	Not Found	Not Found
	FALSE	High	[K].VDIEAPDVSLEGPEGK.[L]	1xTMT6plex [K16]; 1xTMT6plex [N-Term]		FALSE	0.00045462	0.000146789	1	1	2	Q09666	Q09666 [1162-1177]	0	2113.14	0	1.15	0.733	1.093	1.085					140.7	84.5	122.3	77.9	85.1	89.6								Not Found	Not Found	Not Found	Not Found	Not Found	Not Found	Not Found	Not Found	Not Found	Not Found	High	Not Found
	FALSE	High	[K].VDIEAPDVSLEGPEGK.[L]			FALSE	0.000353944	0.000146789	1	1	2	Q09666	Q09666 [1162-1177]	0	1654.82	0																					No Quan Labels	Not Found	Not Found	Not Found	Not Found	Not Found	Not Found	High	Not Found	Not Found	Not Found	Not Found	Not Found
	FALSE	High	[K].VDVNAPDVQAPDWHLK.[M]	1xTMT6plex [K16]; 1xTMT6plex [N-Term]		FALSE	0.000346225	0.000146789	1	2	2	Q09666	Q09666 [2494-2509]	0	2262.23	0	1.261	0.834	1.8	1.41					121.8	100.8	96.6	71.5	128.8	80.6								Not Found	Not Found	Not Found	Not Found	Not Found	High	Not Found	Not Found	Not Found	Not Found	Not Found	Not Found
	FALSE	High	[K].VDVEVPDVSLEGPEGK.[L]	1xTMT6plex [N-Term]		FALSE	0.000340253	0.000146789	1	2	2	Q09666	Q09666 [1290-1305]; [2084-2099]; [2279-2294]	0	1898	0	1.176	0.794	1.468	0.886					143.4	62.9	121.9	70.9	104.2	96.7								Not Found	Not Found	Not Found	Not Found	Not Found	Not Found	Not Found	Not Found	High	Not Found	Not Found	Not Found
	FALSE	High	[RK].VDVDIPDVNIEGPDAK.[L]	1xTMT6plex [K16]; 1xTMT6plex [N-Term]		FALSE	0.000389759	0.000146789	1	2	2	Q09666	Q09666 [4816-4831]	0	2154.17	0																					No Quan Values	High	Not Found	Not Found	Not Found	Not Found	Not Found	Not Found	Not Found	Not Found	Not Found	Not Found	Not Found
	FALSE	High	[K].VDTNAPDLSLEGPEGK.[L]	1xPhospho [S9]; 1xTMT6plex [K16]; 1xTMT6plex [N-Term]	Q09666 1xPhospho [S1042]	FALSE	0.000370282	0.000146789	1	2	2	Q09666	Q09666 [1034-1049]	0	2180.09	0	0.602	0.771	0.374	0.385					95	49.3	157.8	128.3	48	121.6								Not Found	Not Found	Not Found	Not Found	Not Found	Not Found	Not Found	Not Found	High	Not Found	Not Found	Not Found
	FALSE	High	[K].VDVSAPDVEMQGPDWNLK.[M]	1xOxidation [M10]; 1xTMT6plex [K18]; 1xTMT6plex [N-Term]		FALSE	0.000234381	0.000146789	1	2	2	Q09666	Q09666 [980-997]	0	2474.26	0	0.535	0.978	0.188	0.297					62.9	60.9	117.7	204.8	38.6	115.1								Not Found	Not Found	High	Not Found	Not Found	Not Found	Not Found	Not Found	Not Found	Not Found	Not Found	Not Found
	FALSE	High	[K].TVIRLPSGSGAASPTGSAVDIR.[A]	2xPhospho [S]	Q09666 2xPhospho [S]	FALSE	0.000228334	0.000146789	1	2	5	Q09666	Q09666 [204-225]	1	2272.07	0																					No Quan Labels	Not Found	Not Found	Not Found	Not Found	Not Found	Not Found	Not Found	High	Not Found	Not Found	Not Found	Not Found
	FALSE	High	[K].TVIRLPSGSGAASPTGSAVDIR.[A]	1xPhospho [S/T]	Q09666 1xPhospho [S/T]	FALSE	0.000309078	0.000146789	1	2	11	Q09666	Q09666 [204-225]	1	2192.11	0																					No Quan Labels	Not Found	Not Found	Not Found	Not Found	Not Found	Not Found	Not Found	Not Found	High	High	Not Found	Not Found
	FALSE	High	[K].ASLGSLEGEAEAEASSPK.[G]	2xPhospho [S]; 1xTMT6plex [K18]; 1xTMT6plex [N-Term]	Q09666 2xPhospho [S]	FALSE	0.000285758	0.000146789	1	1	8	Q09666	Q09666 [5748-5765]	0	2351.08	0	0.942	0.635	0.652	0.541	1	1	1	1	162.8	38.1	172.9	70.4	46	109.8	5.36	2.75	1.29	14.41	0.44	2.24		Not Found	Not Found	Not Found	Not Found	Not Found	Not Found	High	High	Not Found	Not Found	Not Found	Not Found
	FALSE	High	[K].VPGIDATTK.[L]	1xTMT6plex [K9]; 1xTMT6plex [N-Term]		FALSE	0.000445323	0.000146789	1	2	2	Q09666	Q09666 [5347-5355]	0	1359.82	0	1.726	1.025	1.707	1.285					169.5	74.5	98.2	58	99	100.7								Not Found	Not Found	Not Found	Not Found	Not Found	Not Found	Not Found	Not Found	Not Found	High	Not Found	Not Found
	FALSE	High	[K].VNVEAPDVNLEGLGGK.[L]	1xTMT6plex [K16]; 1xTMT6plex [N-Term]		FALSE	0.000304155	0.000146789	1	2	2	Q09666	Q09666 [664-679]	0	2069.16	0	1.485	0.813	1.737	1.097					141.9	81.5	95.5	74.3	129.1	77.7								Not Found	Not Found	Not Found	Not Found	Not Found	High	Not Found	Not Found	Not Found	Not Found	Not Found	Not Found
	FALSE	High	[K].VGIDTPDIDIHGPEGK.[L]	1xPhospho [T5]; 1xTMT6plex [K16]; 1xTMT6plex [N-Term]	Q09666 1xPhospho [T4564]	FALSE	0.000276241	0.000146789	1	3	2	Q09666	Q09666 [4560-4575]	0	2201.13	0	0.238	0.213	0.503	0.491					56.7	62.7	238	127.7	64.2	50.8								Not Found	Not Found	Not Found	Not Found	Not Found	Not Found	Not Found	Not Found	Not Found	Not Found	High	Not Found
	FALSE	High	[K].APDVEGQGLDWSLK.[I]	1xTMT6plex [K14]; 1xTMT6plex [N-Term]		FALSE	0.000638448	0.000151834	1	1	2	Q09666	Q09666 [1112-1125]	0	1973.07	0	1.197	0.59	2.031	1.307					139.7	82.8	116.7	63.4	128.7	68.8								Not Found	Not Found	Not Found	Not Found	Not Found	High	Not Found	Not Found	Not Found	Not Found	Not Found	Not Found
	FALSE	High	[K].VQTPEVDVK.[G]	1xTMT6plex [N-Term]		FALSE	0.00051441	0.000151834	1	1	2	Q09666	Q09666 [3364-3372]	0	1243.71	0	1.327	1.257	2.332	1.152					134.9	60.6	101.7	52.6	122.6	127.7								Not Found	Not Found	Not Found	Not Found	Not Found	Not Found	Not Found	Not Found	Not Found	High	Not Found	Not Found
	FALSE	High	[R].ISAPNVDFNLEGPK.[V]	1xPhospho [S2]; 1xTMT6plex [K14]; 1xTMT6plex [N-Term]	Q09666 1xPhospho [S5448]	FALSE	0.000505951	0.000151834	1	2	2	Q09666	Q09666 [5447-5460]	0	2039.06	0	0.359	0.363	0.27	0.171					69.5	31.6	193.5	185.1	50	70.2								Not Found	Not Found	High	Not Found	Not Found	Not Found	Not Found	Not Found	Not Found	Not Found	Not Found	Not Found
	FALSE	High	[KN].ISMPDVDLNLK.[G]	1xOxidation [M3]; 1xTMT6plex [K11]; 1xTMT6plex [N-Term]		FALSE	0.000683619	0.000151834	1	1	2	Q09666	Q09666 [1323-1333]; [2453-2463]	0	1718.98	0	1.152	1.111	0.824	0.529					92.9	75.8	80.6	143.3	118.1	89.5								Not Found	Not Found	Not Found	Not Found	Not Found	Not Found	High	Not Found	Not Found	Not Found	Not Found	Not Found
	FALSE	High	[R].ISMSEVDLNVAAPK.[V]	1xPhospho [S2]; 1xTMT6plex [K14]; 1xTMT6plex [N-Term]	Q09666 1xPhospho [S570]	FALSE	0.000742956	0.000151834	1	2	2	Q09666	Q09666 [569-582]	0	2012.05	0	0.357	0.364	0.348	0.532					59.1	89.2	165.5	167.7	58.3	60.2								Not Found	Not Found	Not Found	High	Not Found	Not Found	Not Found	Not Found	Not Found	Not Found	Not Found	Not Found
	FALSE	High	[K].MQVGGDGVK.[V]	1xTMT6plex [K9]; 1xTMT6plex [N-Term]		FALSE	0.000723967	0.000151834	1	2	2	Q09666	Q09666 [5338-5346]	0	1348.77	0	1.69	1.018	1.681	1.681					152.3	102.5	90.1	61	102.5	91.7								Not Found	Not Found	Not Found	Not Found	Not Found	High	Not Found	Not Found	Not Found	Not Found	Not Found	Not Found
	FALSE	High	[K].IDVDAPDIDIHGPDAK.[L]	1xTMT6plex [N-Term]		FALSE	0.000593854	0.000151834	1	1	4	Q09666	Q09666 [3260-3275]	0	1919.99	0	1.203	0.965	1.757	1.33	1	1	0.554309	1	131.3	82.8	109.1	62.3	109.4	105.2	0.54	13.74	17.89	3.73	3.66	8.75		Not Found	Not Found	Not Found	Not Found	Not Found	Not Found	Not Found	Not Found	High	High	Not Found	Not Found
	FALSE	High	[K].VDIDTPDIDIHGPEGK.[L]	1xTMT6plex [N-Term]		FALSE	0.000670865	0.000151834	1	2	2	Q09666	Q09666 [4096-4111]	0	1950	0	1.105	0.963	1.313	0.897					126	69.9	114	77.9	102.4	109.8								Not Found	Not Found	Not Found	Not Found	Not Found	Not Found	Not Found	Not Found	High	Not Found	Not Found	Not Found
	FALSE	High	[K].MDIDAPDVDVHGPDWHLK.[M]	1xOxidation [M1]; 1xTMT6plex [K18]; 1xTMT6plex [N-Term]		FALSE	0.000630691	0.000151834	1	2	1	Q09666	Q09666 [2030-2047]	0	2534.27	0	1.402	1.014	0.937	0.775					154.7	63.7	110.4	82.2	77	112								Not Found	Not Found	Not Found	Not Found	Not Found	Not Found	Not Found	Not Found	Not Found	Not Found	Not Found	High
	FALSE	High	[K].GEGPDGDVK.[L]	1xTMT6plex [K9]; 1xTMT6plex [N-Term]		FALSE	0.000646342	0.000151834	1	2	2	Q09666	Q09666 [2653-2661]	0	1331.72	0	1.423	0.844	1.538	1.545					145.1	101	102	65.3	100.5	86								Not Found	Not Found	Not Found	Not Found	Not Found	Not Found	Not Found	High	Not Found	Not Found	Not Found	Not Found
	FALSE	High	[K].GEGPEVDVTLPK.[A]	1xTMT6plex [K12]; 1xTMT6plex [N-Term]		FALSE	0.00057659	0.000151834	1	1	2	Q09666	Q09666 [3617-3628]	0	1698.97	0	1.564	0.983	1.546	1.048					162.7	67.4	104	64.3	99.4	102.3								Not Found	Not Found	Not Found	Not Found	Not Found	Not Found	Not Found	Not Found	Not Found	Not Found	Not Found	High
	FALSE	High	[K].GEGPEVDVNLPK.[A]	1xTMT6plex [N-Term]		FALSE	0.000687945	0.000151834	1	3	2	Q09666	Q09666 [1141-1152]; [2258-2269]; [3165-3176]; [3947-3958]; [4075-4086]	0	1482.8	0	1.563	0.966	2.201	1.202					153.8	69	98.4	57.4	126.4	95								Not Found	Not Found	Not Found	Not Found	Not Found	Not Found	Not Found	High	Not Found	Not Found	Not Found	Not Found
	FALSE	High	[K].GDYDVTVPK.[V]	1xTMT6plex [K9]; 1xTMT6plex [N-Term]		FALSE	0.000538031	0.000151834	1	1	4	Q09666	Q09666 [1467-1475]	0	1451.81	0	1.017	0.859	1.308	1.072	1	1	1	1	116.5	85.8	114.5	80.1	104.7	98.4	13.8	15.12	11.65	12.8	10.52	17.4		High	High	Not Found	Not Found	Not Found	Not Found	Not Found	Not Found	Not Found	Not Found	Not Found	Not Found
	FALSE	High	[K].AEGPEVDVNLPK.[A]	1xTMT6plex [N-Term]; 1xTMT6plex [K12]		FALSE	0.000492315	0.000151834	1	3	2	Q09666	Q09666 [764-775]; [892-903]; [1727-1738]; [2063-2074]; [2525-2536]; [2909-2920]	0	1496.82	0	1.469	1.091	2.109	1.01					147.3	59.6	100.3	59	124.5	109.3								Not Found	Not Found	Not Found	Not Found	Not Found	Not Found	Not Found	High	Not Found	Not Found	Not Found	Not Found
	FALSE	High	[K].GPQVSGELK.[G]	1xTMT6plex [K9]; 1xTMT6plex [N-Term]		FALSE	0.00055682	0.000151834	1	2	2	Q09666	Q09666 [5426-5434]	0	1372.82	0	1.462	1.161	1.346	1.08					150.1	71.9	102.7	66.6	89.6	119.2								Not Found	Not Found	Not Found	High	Not Found	Not Found	Not Found	Not Found	Not Found	Not Found	Not Found	Not Found
	FALSE	High	[K].ADVVVSGPK.[V]	1xTMT6plex [N-Term]		FALSE	0.000497702	0.000151834	1	2	2	Q09666	Q09666 [1153-1161]; [2075-2083]	0	1100.65	0	1.488	1.031	2.122	0.979					159.6	53.1	107.2	54.3	115.2	110.6								High	Not Found	Not Found	Not Found	Not Found	Not Found	Not Found	Not Found	Not Found	Not Found	Not Found	Not Found
	FALSE	High	[K].GGVTGSPEASISGSK.[G]	2xPhospho [S14; S/T]; 1xTMT6plex [N-Term]	Q09666 2xPhospho [S5739; T/S]	FALSE	0.000921931	0.000163068	1	1	2	Q09666	Q09666 [5726-5740]	0	1722.75	0	1.203	1.119	0.827	0.332					127.8	38	106.2	114.5	94.6	118.9								Not Found	Not Found	Not Found	Not Found	Not Found	Not Found	High	Not Found	Not Found	Not Found	Not Found	Not Found
	FALSE	High	[K].ISMPDFDLHLK.[G]	1xOxidation [M3]		FALSE	0.000860393	0.000163068	1	4	2	Q09666	Q09666 [2579-2589]; [4001-4011]; [4257-4267]; [4459-4469]	0	1331.67	0																					No Quan Labels	Not Found	Not Found	Not Found	Not Found	Not Found	Not Found	Not Found	Not Found	Not Found	Not Found	Not Found	Not Found
	FALSE	High	[K].GEGPEVDVTLPK.[A]	1xTMT6plex [N-Term]		FALSE	0.000804146	0.000163068	1	1	2	Q09666	Q09666 [3617-3628]	0	1469.8	0	1.851	0.951	2.07	1.352					172.4	75.2	93.1	55.6	115.1	88.6								Not Found	Not Found	Not Found	Not Found	Not Found	Not Found	Not Found	High	Not Found	Not Found	Not Found	Not Found
	FALSE	High	[K].GDMDVSVPK.[V]	1xOxidation [M3]; 1xTMT6plex [K9]; 1xTMT6plex [N-Term]		FALSE	0.000890469	0.000163068	1	2	6	Q09666	Q09666 [1669-1677]; [2005-2013]; [2200-2208]	0	1421.77	0	1.347	0.991	1.392	0.997	1	1	1	1	141.4	73.5	105	73.7	102.5	104	5.33	19.03	6.32	11.81	4.67	13.81		Not Found	High	Not Found	Not Found	Not Found	Not Found	Not Found	Not Found	Not Found	High	High	Not Found
	FALSE	High	[K].LEGDLTGPSVDVEVPDVELECPDAK.[L]	1xCarbamidomethyl [C21]; 1xTMT6plex [N-Term]		FALSE	0.000921931	0.000163068	1	2	2	Q09666	Q09666 [2142-2166]	0	2912.43	0	1.791	0.01	3.793	2.611					135.1	137.4	75.4	52.6	199.5									Not Found	Not Found	Not Found	Not Found	Not Found	Not Found	Not Found	Not Found	High	Not Found	Not Found	Not Found
	FALSE	High	[K].GDRSPEPGQTWTR.[E]	1xPhospho [S4]	Q09666 1xPhospho [S93]	FALSE	0.000890469	0.000163068	1	8	2	Q09666	Q09666 [90-102]	1	1566.67	0																					No Quan Labels	Not Found	Not Found	Not Found	Not Found	Not Found	Not Found	Not Found	Not Found	Not Found	Not Found	Not Found	Not Found
	FALSE	High	[K].GPGVDLPSVNLSMPK.[V]	1xOxidation [M13]; 1xTMT6plex [K15]; 1xTMT6plex [N-Term]		FALSE	0.000757647	0.000163068	1	2	4	Q09666	Q09666 [5282-5296]	0	1985.11	0	1.74	1.181	1.465	0.769	1	1	1	1	167.8	52.7	96.5	68.6	100.5	113.9	4.23	1.59	1.29	1.01	1.62	3.6		Not Found	Not Found	Not Found	Not Found	Not Found	Not Found	Not Found	Not Found	High	High	Not Found	Not Found
	FALSE	High	[K].LEGPDVSLK.[G]	1xTMT6plex [K9]; 1xTMT6plex [N-Term]		FALSE	0.00078823	0.000163068	1	2	2	Q09666	Q09666 [5273-5281]	0	1415.85	0	1.618	1.039	1.574	1.095					156.3	73.6	96.6	67.2	105.8	100.4								Not Found	Not Found	Not Found	Not Found	Not Found	High	Not Found	Not Found	Not Found	Not Found	Not Found	Not Found
	FALSE	High	[K].ASLGSLEGEAEAEASSPK.[G]	3xPhospho [S2; S5; S16]; 1xTMT6plex [K18]; 1xTMT6plex [N-Term]	Q09666 3xPhospho [S5749; S5752; S5763]	FALSE	0.000762631	0.000163068	1	1	2	Q09666	Q09666 [5748-5765]	0	2431.05	0	0.47	0.337	0.457	0.391					92.1	52	195.9	133.1	60.9	66.1								Not Found	Not Found	Not Found	Not Found	Not Found	High	Not Found	Not Found	Not Found	Not Found	Not Found	Not Found
	FALSE	High	[K].VDIDAPDVSIEGPDAK.[L]			FALSE	0.000989294	0.000173014	1	3	2	Q09666	Q09666 [4352-4367]	0	1640.8	0																					No Quan Labels	Not Found	Not Found	Not Found	Not Found	Not Found	Not Found	High	Not Found	Not Found	Not Found	Not Found	Not Found
	FALSE	High	[K].VDINAPDVDVR.[G]	1xTMT6plex [N-Term]		FALSE	0.00104777	0.000173014	1	1	2	Q09666	Q09666 [3914-3924]	0	1441.78	0	1.316	0.705	1.327	0.758					155.3	59.8	118	78.9	104.7	83.2								Not Found	Not Found	Not Found	Not Found	Not Found	Not Found	Not Found	Not Found	Not Found	Not Found	High	Not Found
	FALSE	High	[PR].EVDVNLPK.[A]	1xTMT6plex [K8]; 1xTMT6plex [N-Term]		FALSE	0.00100352	0.000173014	1	1	2	Q09666	Q09666 [768-775]; [896-903]; [1145-1152]; [1273-1280]; [1731-1738]; [2067-2074]; [2262-2269]; [2529-2536]; [2913-2920]; [3169-3176]; [3951-3958]; [4079-4086]	0	1371.82	0	1.47	1.27	1.303	0.948					143.8	68.2	97.8	72	93.8	124.3								Not Found	Not Found	High	Not Found	Not Found	Not Found	Not Found	Not Found	Not Found	Not Found	Not Found	Not Found
	FALSE	High	[K].MDAEVPDVNIEGPDAK.[L]	1xTMT6plex [K16]; 1xTMT6plex [N-Term]		FALSE	0.00116953	0.000173014	1	1	2	Q09666	Q09666 [1418-1433]	0	2158.11	0	1.17	1.157	0.829	0.847					115.8	85.7	99	101.2	83.9	114.5								Not Found	Not Found	Not Found	Not Found	Not Found	Not Found	Not Found	Not Found	Not Found	High	Not Found	Not Found
	FALSE	High	[K].MPTFSTPGAK.[G]	1xTMT6plex [K10]; 1xTMT6plex [N-Term]		FALSE	0.00114384	0.000173014	1	2	2	Q09666	Q09666 [633-642]	0	1494.84	0	1.459	0.703	1.273	0.934					148.8	80.8	102	86.5	110.1	71.8								Not Found	Not Found	Not Found	Not Found	High	Not Found	Not Found	Not Found	Not Found	Not Found	Not Found	Not Found
	FALSE	High	[K].TVIRLPSGSGAASPTGSAVDIR.[A]	2xPhospho [S/T]; 1xTMT6plex [N-Term]	Q09666 2xPhospho [S/T]	FALSE	0.00116953	0.000173014	1	2	7	Q09666	Q09666 [204-225]	1	2501.24	0	0.771	0.649	0.336	0.255	1	1	1	1	136.7	27.5	177.2	107.5	36.2	115	7.82	53.05	34.7	7.73	17.25	57.94		Not Found	Not Found	Not Found	High	High	Not Found	Not Found	Not Found	Not Found	Not Found	Not Found	Not Found
	FALSE	High	[K].GPAFNMASPESDFGINLK.[G]	1xPhospho [S8]; 1xOxidation [M6]	Q09666 1xPhospho [S5552]	FALSE	0.00102534	0.000173014	1	2	2	Q09666	Q09666 [5545-5562]	0	1990.86	0																					No Quan Labels	Not Found	Not Found	Not Found	Not Found	Not Found	Not Found	Not Found	Not Found	High	Not Found	Not Found	Not Found
	FALSE	High	[K].ISMPDLDLNLK.[G]	1xTMT6plex [N-Term]		FALSE	0.00111065	0.000173014	1	2	4	Q09666	Q09666 [2707-2717]; [3091-3101]; [3219-3229]; [3543-3553]; [3745-3755]; [3873-3883]; [4721-4731]	0	1487.83	0	0.668	0.298	3.957	2.462					80.3	120.7	120.3	49	193.9	35.8								Not Found	Not Found	Not Found	Not Found	Not Found	Not Found	Not Found	Not Found	Not Found	Not Found	High	Not Found
	FALSE	High	[K].ISMPDLDLNLK.[G]	1xOxidation [M3]; 1xTMT6plex [K11]; 1xTMT6plex [N-Term]		FALSE	0.000948145	0.000173014	1	2	16	Q09666	Q09666 [2707-2717]; [3091-3101]; [3219-3229]; [3543-3553]; [3745-3755]; [3873-3883]; [4721-4731]	0	1732.99	0	2.063	1.091	1.438	0.807	0.727065	1	1	1	189.6	54.2	91.9	67.2	96.7	100.3	8.31	14.92	4.71	14.43	6.7	8.67		Not Found	Not Found	Not Found	Not Found	Not Found	Not Found	Not Found	High	High	Not Found	Not Found	Not Found
	FALSE	High	[K].ISMPDVDLHLK.[G]	1xPhospho [S2]; 1xTMT6plex [K11]; 1xTMT6plex [N-Term]	Q09666 1xPhospho [S819]; 1xPhospho [S2013]; 1xPhospho [S3665]; 1xPhospho [S5519]; 1xPhospho [S7440]; 1xPhospho [S9428]; 1xPhospho [S11544]	FALSE	0.000975327	0.000173014	1	3	2	Q09666	Q09666 [818-828]; [1195-1205]; [1653-1663]; [1855-1865]; [1922-1932]; [1989-1999]; [2117-2127]	0	1805.96	0	0.148	0.117	0.6	0.707					44.7	66.8	302	94.4	56.6	35.4								Not Found	Not Found	Not Found	Not Found	Not Found	High	Not Found	Not Found	Not Found	Not Found	Not Found	Not Found
	FALSE	High	[K].GSEVGFHGAAPDISVK.[G]	1xTMT6plex [N-Term]		FALSE	0.00107864	0.000173014	1	2	2	Q09666	Q09666 [5529-5544]	0	1799.95	0	1.082	0.797	1.007	0.666					125.1	66.6	115.6	100	100.6	92.1								High	Not Found	Not Found	Not Found	Not Found	Not Found	Not Found	Not Found	Not Found	Not Found	Not Found	Not Found
	FALSE	High	[K].ADIDVSGPK.[V]			FALSE	0.00137023	0.000184814	1	4	4	Q09666	Q09666 [1281-1289]; [2665-2673]; [2793-2801]; [3049-3057]; [3177-3185]; [3831-3839]; [3959-3967]; [4087-4095]; [4215-4223]; [4679-4687]; [4807-4815]	0	901.463	0																					No Quan Labels	Not Found	Not Found	Not Found	Not Found	Not Found	Not Found	Not Found	Not Found	Not Found	Not Found	Not Found	Not Found
	FALSE	High	[K].ADVDVSGPK.[MV]			FALSE	0.00132902	0.000184814	1	2	4	Q09666	Q09666 [1409-1417]; [2270-2278]; [2921-2929]	0	887.447	0																					No Quan Labels	High	Not Found	Not Found	Not Found	Not Found	Not Found	Not Found	Not Found	Not Found	Not Found	Not Found	Not Found
	FALSE	High	[K].ISMPDVDFNLK.[G]	1xOxidation [M3]; 1xTMT6plex [K11]; 1xTMT6plex [N-Term]		FALSE	0.00137023	0.000184814	1	2	4	Q09666	Q09666 [2312-2322]	0	1752.96	0	1.951	1.602	1.669	0.892					162.3	55.4	83.2	62.1	103.7	133.2								Not Found	Not Found	Not Found	Not Found	Not Found	Not Found	Not Found	High	High	Not Found	Not Found	Not Found
	FALSE	High	[K].TVIRLPSGSGAASPTGSAVDIR.[A]	1xPhospho [S/T]; 1xTMT6plex [N-Term]	Q09666 1xPhospho [S/T]	FALSE	0.00124155	0.000184814	1	2	10	Q09666	Q09666 [204-225]	1	2421.27	0	0.273	0.324	0.588	0.676	0.731873	1	1	1	58.3	77.2	213.8	114.2	67.2	69.2	15.59	7.01	2.55	6.24	5.74	8.53		Not Found	Not Found	Not Found	Not Found	Not Found	Not Found	High	High	Not Found	Not Found	Not Found	Not Found
	FALSE	High	[K].GDVDVSLPK.[VML]			FALSE	0.00131895	0.000184814	1	4	2	Q09666	Q09666 [2133-2141]; [2595-2603]; [2723-2731]; [3761-3769]; [4017-4025]; [4145-4153]; [4273-4281]; [4401-4409]; [4475-4483]	0	929.494	0																					No Quan Labels	Not Found	Not Found	Not Found	Not Found	Not Found	Not Found	High	Not Found	Not Found	Not Found	Not Found	Not Found
	FALSE	High	[K].VSGPDLDLNLK.[G]	1xTMT6plex [K11]; 1xTMT6plex [N-Term]		FALSE	0.00158746	0.00022864	1	2	1	Q09666	Q09666 [5297-5307]	0	1628.96	1	1.748	0.965	1.883	1.29					158.3	81.5	90.6	63.2	119	87.4								Not Found	Not Found	Not Found	Not Found	Not Found	Not Found	Not Found	High	Not Found	Not Found	Not Found	Not Found
	FALSE	High	[K].GEYDVTVPK.[L]	1xTMT6plex [K9]; 1xTMT6plex [N-Term]		FALSE	0.00158746	0.00022864	1	2	2	Q09666	Q09666 [713-721]	0	1465.83	0	1.377	1.021	1.841	1.407					111.3	107.8	80.8	76.6	141	82.5								High	Not Found	Not Found	Not Found	Not Found	Not Found	Not Found	Not Found	Not Found	Not Found	Not Found	Not Found
	FALSE	High	[K].GDVDVTGPK.[V]	1xTMT6plex [K9]; 1xTMT6plex [N-Term]		FALSE	0.00161254	0.00022864	1	1	2	Q09666	Q09666 [2851-2859]	0	1345.77	0	1.119	0.78	1.304	1.053					136.4	77.4	121.9	73.5	95.8	95.1								Not Found	Not Found	Not Found	Not Found	Not Found	Not Found	Not Found	Not Found	Not Found	Not Found	Not Found	High
	FALSE	High	[R].SNSFSDEREFSGPSTPTGTLEFEGGEVSLEGGK.[V]	2xPhospho [S/T]; 1xTMT6plex [K33]; 1xTMT6plex [N-Term]	Q09666 2xPhospho [T/S]	FALSE	0.00165101	0.00022864	1	1	2	Q09666	Q09666 [5780-5812]	1	4052.81	0	1.105	0.64	0.968	0.566					179.2	34.5	162.2	61	59.1	103.9								Not Found	Not Found	Not Found	Not Found	Not Found	Not Found	Not Found	High	Not Found	Not Found	Not Found	Not Found
	FALSE	High	[K].GEGPDVDVSLPK.[A]	1xTMT6plex [N-Term]		FALSE	0.00177272	0.000242745	1	2	2	Q09666	Q09666 [4795-4806]	0	1441.77	0	1.558	0.771	2.239	1.38					162.8	75.3	104.5	54.6	122.2	80.6								Not Found	Not Found	Not Found	Not Found	Not Found	Not Found	Not Found	High	Not Found	Not Found	Not Found	Not Found
	FALSE	High	[K].ISMPEVDLNLK.[G]	1xOxidation [M3]; 1xTMT6plex [N-Term]		FALSE	0.00169051	0.000242745	1	3	2	Q09666	Q09666 [4129-4139]; [4593-4603]	0	1503.83	1	1.309	0.987	1.172	0.631					146.6	51.9	112	82.3	96.5	110.6								Not Found	Not Found	High	Not Found	Not Found	Not Found	Not Found	Not Found	Not Found	Not Found	Not Found	Not Found
	FALSE	High	[K].GEVDVSLANVEGDLK.[G]	1xTMT6plex [K15]; 1xTMT6plex [N-Term]		FALSE	0.00181548	0.000274162	1	1	2	Q09666	Q09666 [3235-3249]	0	2003.11	0																					No Quan Values	Not Found	Not Found	Not Found	Not Found	Not Found	Not Found	Not Found	Not Found	Not Found	Not Found	High	Not Found
	FALSE	High	[K].ADIDVSGPK.[V]	1xTMT6plex [N-Term]		FALSE	0.0018893	0.00028858	1	4	8	Q09666	Q09666 [1281-1289]; [2665-2673]; [2793-2801]; [3049-3057]; [3177-3185]; [3831-3839]; [3959-3967]; [4087-4095]; [4215-4223]; [4679-4687]; [4807-4815]	0	1130.63	0	1.531	1.135	2.136	1.136	1	1	1	1	156.7	59.8	102.3	52.6	112.5	116.1	3.17	4.42	12.67	1.67	1.15	12.79		Not Found	Not Found	Not Found	Not Found	Not Found	Not Found	Not Found	Not Found	High	High	Not Found	Not Found
	FALSE	High	[K].GSLGATGEIK.[G]	1xTMT6plex [K10]; 1xTMT6plex [N-Term]		FALSE	0.00193517	0.000298236	1	2	1	Q09666	Q09666 [5463-5472]	0	1390.83	1	1.2	0.987	0.511	0.424					129.6	56	108	132.2	67.5	106.6								Not Found	Not Found	Not Found	Not Found	High	Not Found	Not Found	Not Found	Not Found	Not Found	Not Found	Not Found
	FALSE	High	[R].LKSEDGVEGDLGETQSR.[T]	1xPhospho [S3]; 1xTMT6plex [K2]; 1xTMT6plex [N-Term]	Q09666 1xPhospho [S135]	FALSE	0.00191975	0.000298236	1	2	5	Q09666	Q09666 [133-149]	1	2358.16	0	0.904	0.876	0.348	0.276	1	1	0.00591323	0.0018802	130.9	33.6	144.8	121.6	42.3	126.8	2.61	0.29	3.62	1.49	2.48	8.99		Not Found	Not Found	Not Found	Not Found	Not Found	Not Found	Not Found	Not Found	High	High	Not Found	Not Found
	FALSE	High	[K].APNISMPDVDLNLK.[G]	1xOxidation [M6]; 1xTMT6plex [K14]; 1xTMT6plex [N-Term]		FALSE	0.00223694	0.000308191	1	2	1	Q09666	Q09666 [2450-2463]	0	2001.11	0	2	1.081	1.215	0.704					184.2	54.1	92.1	76.8	93.3	99.5								Not Found	Not Found	Not Found	Not Found	Not Found	High	Not Found	Not Found	Not Found	Not Found	Not Found	Not Found
	FALSE	High	[K].GPGVDVNLK.[G]	1xTMT6plex [K9]; 1xTMT6plex [N-Term]		FALSE	0.00242584	0.000308191	1	2	2	Q09666	Q09666 [5435-5443]	0	1356.83	0	1.737	1.072	1.505	1.162					154.8	82.5	89.2	71	106.9	95.6								Not Found	Not Found	Not Found	Not Found	Not Found	High	Not Found	Not Found	Not Found	Not Found	Not Found	Not Found
	FALSE	High	[K].LQVTMPGIK.[V]	1xTMT6plex [K9]; 1xTMT6plex [N-Term]		FALSE	0.00221892	0.000308191	1	2	2	Q09666	Q09666 [244-252]	0	1444.9	0	1.026	0.656	1.453	1.244					98.3	115.4	95.8	92.8	134.9	62.8								Not Found	Not Found	Not Found	Not Found	Not Found	Not Found	Not Found	High	Not Found	Not Found	Not Found	Not Found
	FALSE	High	[K].ISMQDVDLSLGSPK.[L]	1xOxidation [M3]; 1xTMT6plex [K14]; 1xTMT6plex [N-Term]		FALSE	0.00220105	0.000308191	1	2	2	Q09666	Q09666 [500-513]	0	1964.08	0	1.965	1.388	1.557	0.809					169	54.3	86	67	104.4	119.3								Not Found	Not Found	Not Found	Not Found	Not Found	Not Found	High	Not Found	Not Found	Not Found	Not Found	Not Found
	FALSE	High	[K].VGGSGVNVNAK.[G]	1xTMT6plex [N-Term]		FALSE	0.00265273	0.00031951	1	2	2	Q09666	Q09666 [253-263]	0	1230.7	0	1.557	1.11	1.977	0.9					159.4	52.1	102.4	57.9	114.5	113.7								High	Not Found	Not Found	Not Found	Not Found	Not Found	Not Found	Not Found	Not Found	Not Found	Not Found	Not Found
	FALSE	High	[R].SNSFSDEREFSGPSTPTGTLEFEGGEVSLEGGK.[V]	1xPhospho [S]; 1xTMT6plex [N-Term]; 1xTMT6plex [K33]	Q09666 1xPhospho [S]	FALSE	0.00274047	0.000332126	1	1	7	Q09666	Q09666 [5780-5812]	1	3743.68	0	0.56	0.425	0.513	0.297					111.6	33.6	199.1	113.1	58	84.6								Not Found	Not Found	Not Found	Not Found	Not Found	Not Found	Not Found	High	Not Found	Not Found	Not Found	Not Found
	FALSE	High	[K].VDIDTPDIDIHGPEGK.[L]	1xPhospho [T5]	Q09666 1xPhospho [T4100]	FALSE	0.00280817	0.000332126	1	2	2	Q09666	Q09666 [4096-4111]	0	1800.81	0																					No Quan Labels	Not Found	Not Found	Not Found	Not Found	Not Found	High	Not Found	Not Found	Not Found	Not Found	Not Found	Not Found
	FALSE	High	[K].GGVTGSPEASISGSK.[G]	2xPhospho [S14; S/T]; 1xTMT6plex [K15]; 1xTMT6plex [N-Term]	Q09666 2xPhospho [S5739; T/S]	FALSE	0.00280817	0.000332126	1	1	2	Q09666	Q09666 [5726-5740]	0	1951.92	0	1.472	1.614	0.677	0.358					122.1	46	83	128.3	86.8	133.9								Not Found	Not Found	Not Found	Not Found	Not Found	Not Found	Not Found	High	Not Found	Not Found	Not Found	Not Found
	FALSE	High	[K].GPEVDIEGPEGK.[L]	1xTMT6plex [K12]; 1xTMT6plex [N-Term]		FALSE	0.00278542	0.000332126	1	3	2	Q09666	Q09666 [4490-4501]	0	1684.92	0	1.061	0.854	1.085	1.226					122.2	97.9	115.1	79.8	86.6	98.4								Not Found	Not Found	Not Found	Not Found	Not Found	Not Found	Not Found	Not Found	High	Not Found	Not Found	Not Found
	FALSE	High	[K].ISMPDFDLHLK.[G]	1xOxidation [M3]; 1xTMT6plex [K11]; 1xTMT6plex [N-Term]		FALSE	0.00274047	0.000332126	1	4	4	Q09666	Q09666 [2579-2589]; [4001-4011]; [4257-4267]; [4459-4469]	0	1560.83	0	1.644	1.116	1.736	0.893	1	1	1	1	156	59.8	94.9	67	116.3	105.9	10.72	53.87	12.9	11.44	23.74	24.25		Not Found	Not Found	High	Not Found	Not Found	Not Found	High	Not Found	Not Found	Not Found	Not Found	Not Found
	FALSE	High	[K].DIDISSPEFK.[I]	1xPhospho [S6]; 1xTMT6plex [K10]	Q09666 1xPhospho [S177]	FALSE	0.00327664	0.000383746	1	2	4	Q09666	Q09666 [172-181]	0	1459.69	0	1.066	0.992	0.573	0.495	1	1	0.0843031	0.0345068	144.9	44.1	136	89.1	51	134.9	5.59	15.22	0.9	5.4	7.01	4.31		Not Found	Not Found	Not Found	Not Found	Not Found	Not Found	High	High	Not Found	Not Found	Not Found	Not Found
	FALSE	High	[K].IPMPDFDLHLK.[G]	1xOxidation [M3]; 1xTMT6plex [K11]; 1xTMT6plex [N-Term]		FALSE	0.00335716	0.000411441	1	1	3	Q09666	Q09666 [2963-2973]	0	1800.01	0	1.143	0.656	1.336	0.825	1	1	1	1	139.2	67.6	121.8	82	109.5	79.9	1.21	4.49	10.46	3.95	3.86	12.98		High	High	Not Found	Not Found	Not Found	Not Found	Not Found	Not Found	Not Found	Not Found	Not Found	Not Found
	FALSE	High	[R].ISAPNVDFNLEGPK.[V]	1xTMT6plex [K14]; 1xTMT6plex [N-Term]		FALSE	0.00372778	0.000461636	1	2	6	Q09666	Q09666 [5447-5460]	0	1959.1	0	1.383	0.781	1.766	1.236	1	1	0.806096	1	139	87.1	100.5	70.5	124.5	78.4	2.54	20.11	9.73	21.82	3.8	13.61		Not Found	Not Found	Not Found	Not Found	Not Found	Not Found	Not Found	Not Found	High	High	Not Found	Not Found
	FALSE	High	[K].GPQVSSALNLDTSK.[F]	1xTMT6plex [K14]; 1xTMT6plex [N-Term]		FALSE	0.00426784	0.000566795	1	2	2	Q09666	Q09666 [5599-5612]	0	1875.06	0	1.508	1.068	1.383	1.335					132.8	102.4	88.1	76.7	106.1	94								Not Found	Not Found	Not Found	Not Found	Not Found	Not Found	Not Found	High	Not Found	Not Found	Not Found	Not Found
	FALSE	High	[K].ISMPDVDLHVK.[G]	1xOxidation [M3]; 1xTMT6plex [K11]; 1xTMT6plex [N-Term]		FALSE	0.00447395	0.000591958	1	2	2	Q09666	Q09666 [697-707]	0	1727.98	0	1.941	1.085	1.606	0.806					188.1	49.6	96.9	61.5	98.8	105.1								Not Found	Not Found	Not Found	Not Found	Not Found	High	Not Found	Not Found	Not Found	Not Found	Not Found	Not Found
	FALSE	High	[K].GEGPEVDVK.[L]	1xTMT6plex [K9]; 1xTMT6plex [N-Term]		FALSE	0.0045091	0.000603718	1	1	2	Q09666	Q09666 [1397-1405]	0	1387.78	0	1.372	1.06	1.489	1.338					129.6	96.4	94.5	72.1	107.3	100.1								Not Found	Not Found	Not Found	Not Found	Not Found	Not Found	Not Found	High	Not Found	Not Found	Not Found	Not Found
	FALSE	High	[K].ISMPDLDLNLK.[G]	1xOxidation [M3]; 1xTMT6plex [K11]; 1xTMT6plex [N-Term]		FALSE	0.00472482	0.000641005	1	2	12	Q09666	Q09666 [2707-2717]; [3091-3101]; [3219-3229]; [3543-3553]; [3745-3755]; [3873-3883]; [4721-4731]	0	1503.83	0	1.32	1.346	1.11	0.708	1	1	1	1	146.4	48.6	110.9	68.7	76.2	149.2	21.66	5.36	11.77	6.81	13.28	14.59		High	Not Found	High	Not Found	High	Not Found	Not Found	Not Found	Not Found	Not Found	Not Found	Not Found
	FALSE	High	[K].LEGPDVSLK.[G]	1xTMT6plex [N-Term]		FALSE	0.00483582	0.000654136	1	2	2	Q09666	Q09666 [5273-5281]	0	1186.69	0	1.707	1.113	2.005	1.251					148.7	78.5	87.1	62.8	125.9	97								High	Not Found	Not Found	Not Found	Not Found	Not Found	Not Found	Not Found	Not Found	Not Found	Not Found	Not Found
	FALSE	High	[K].GDMDISLPK.[V]	1xTMT6plex [K9]; 1xTMT6plex [N-Term]		FALSE	0.00483582	0.000654136	1	3	1	Q09666	Q09666 [4609-4617]	0	1433.81	0	1.673	1.805	1.643	1.503					108.9	111.8	65.1	74.4	122.3	117.5								Not Found	Not Found	Not Found	Not Found	High	Not Found	Not Found	Not Found	Not Found	Not Found	Not Found	Not Found
	FALSE	High	[R].SNSFSDER.[E]	1xPhospho [S3]; 1xTMT6plex [N-Term]	Q09666 1xPhospho [S5782]	FALSE	0.00510313	0.000742452	1	1	11	Q09666	Q09666 [5780-5787]	0	1250.53	0	0.58	0.512	0.27	0.211	1	1	0.294893	0.126324	106.5	30.8	183.7	145.7	39.4	94	5.43	9.03	6.53	7.43	7.81	6.22		Medium	High	High	High	High	Not Found	Not Found	Not Found	Not Found	Not Found	Not Found	Not Found
	FALSE	High	[K].ISMPDLDLHLK.[S]	1xOxidation [M3]; 1xTMT6plex [K11]; 1xTMT6plex [N-Term]		FALSE	0.00538234	0.000766664	1	2	4	Q09666	Q09666 [2386-2396]	0	1756.01	0	1.909	1.053	1.51	0.85	1	1	1	1	179.3	57.7	93.9	67.8	102.5	98.9	4.65	5.59	6.29	0.6	7.05	12.57		Not Found	Not Found	Not Found	Not Found	Not Found	Not Found	Not Found	Not Found	High	High	Not Found	Not Found
	FALSE	High	[K].VSAPGVQGDVK.[G]	1xTMT6plex [N-Term]		FALSE	0.00571642	0.000807689	1	2	2	Q09666	Q09666 [520-530]	0	1285.73	0	1.699	1.136	2.032	1.024					171.9	53.5	101.2	52.3	106.2	115								Not Found	Not Found	Not Found	Not Found	Not Found	Not Found	Not Found	Not Found	Not Found	Not Found	Not Found	High
	FALSE	High	[K].VDIDVPDVNLEAPEGK.[L]	1xTMT6plex [N-Term]		FALSE	0.00567377	0.000807689	1	1	2	Q09666	Q09666 [1546-1561]	0	1939.02	0	1.109	0.661	1.782	1.564					124.2	104.3	111.9	66.7	118.8	74								Not Found	Not Found	Not Found	Not Found	Not Found	Not Found	Not Found	Not Found	Not Found	High	Not Found	Not Found
	FALSE	High	[K].GPQVSGELK.[G]			FALSE	0.00629451	0.00088185	1	2	2	Q09666	Q09666 [5426-5434]	0	914.494	0																					No Quan Labels	Not Found	Not Found	Not Found	Not Found	High	Not Found	Not Found	Not Found	Not Found	Not Found	Not Found	Not Found
	FALSE	High	[K].LEGGEVDLK.[G]			FALSE	0.00638741	0.000906595	1	2	2	Q09666	Q09666 [4937-4945]	0	959.504	0																					No Quan Labels	Not Found	Not Found	Not Found	Not Found	Not Found	Not Found	Not Found	Not Found	Not Found	Not Found	Not Found	Not Found
	FALSE	High	[R].ISMSEVDLNVAAPK.[V]	1xOxidation [M3]; 1xTMT6plex [K14]; 1xTMT6plex [N-Term]		FALSE	0.00643427	0.000906595	1	2	2	Q09666	Q09666 [569-582]	0	1948.08	0	1.59	1.062	1.113	0.627					164.7	50.7	103.6	80.9	90	110								Not Found	Not Found	Not Found	Not Found	High	Not Found	Not Found	Not Found	Not Found	Not Found	Not Found	Not Found
	FALSE	High	[K].FGTFGGLGSK.[S]	1xTMT6plex [N-Term]		FALSE	0.0064814	0.000918907	1	1	2	Q09666	Q09666 [5822-5831]	0	1199.66	0	1.122	0.737	1.93	0.835					139.5	54.3	124.3	65	125.4	91.6								Not Found	Not Found	Not Found	Not Found	High	Not Found	Not Found	Not Found	Not Found	Not Found	Not Found	Not Found
	FALSE	High	[K].ANVDISAPK.[V]	1xTMT6plex [N-Term]		FALSE	0.00701805	0.00101105	1	2	2	Q09666	Q09666 [1025-1033]	0	1143.66	0	1.666	1.15	2.024	0.911					166.5	50.6	99.9	55.6	112.5	114.9								Not Found	Not Found	Not Found	Not Found	Not Found	Not Found	Not Found	Not Found	Not Found	Not Found	Not Found	High
	FALSE	High	[R].ISMSEVDLNVAAPK.[V]	1xPhospho [S2]; 1xOxidation [M3]; 1xTMT6plex [K14]; 1xTMT6plex [N-Term]	Q09666 1xPhospho [S570]	FALSE	0.00722173	0.00104678	1	2	2	Q09666	Q09666 [569-582]	0	2028.05	0	0.317	0.813	0.238	0.345					50.8	56.5	160.2	163.5	38.8	130.2								Not Found	Not Found	Not Found	Not Found	Not Found	Not Found	Not Found	Not Found	Not Found	Not Found	Not Found	High
	FALSE	High	[K].ISMPDVNLNLK.[G]	1xTMT6plex [K11]; 1xTMT6plex [N-Term]		FALSE	0.00743013	0.0011071	1	2	2	Q09666	Q09666 [2184-2194]	0	1702	0	0.882	0.442	2.561	2.232					92.4	137.3	104.8	61.5	157.6	46.4								Not Found	Not Found	Not Found	High	Not Found	Not Found	Not Found	Not Found	Not Found	Not Found	Not Found	Not Found
	FALSE	High	[K].LPDMSVK.[T]	1xTMT6plex [K7]; 1xTMT6plex [N-Term]		FALSE	0.00753613	0.0011177	1	2	2	Q09666	Q09666 [687-693]	0	1247.74	0	1.582	1.066	1.659	1.256					145.3	85	91.9	67.7	112.3	97.9								High	Not Found	Not Found	Not Found	Not Found	Not Found	Not Found	Not Found	Not Found	Not Found	Not Found	Not Found
	FALSE	High	[K].GEGPDVDVTLPK.[A]	1xTMT6plex [K12]; 1xTMT6plex [N-Term]		FALSE	0.00831302	0.00125248	1	3	2	Q09666	Q09666 [4331-4342]	0	1684.95	0	1.555	1	1.44	0.948					161.4	64.6	103.8	68.1	98.2	103.8								Not Found	Not Found	Not Found	Not Found	Not Found	Not Found	Not Found	Not Found	Not Found	Not Found	Not Found	High
	FALSE	High	[K].AEAPLPSPK.[L]	1xTMT6plex [K9]; 1xTMT6plex [N-Term]		FALSE	0.00831302	0.00125248	1	2	2	Q09666	Q09666 [5104-5112]	0	1367.83	0	1.765	1.005	2.204	1.891					124.3	124.2	70.4	65.7	144.7	70.8								Not Found	Not Found	Not Found	Not Found	High	Not Found	Not Found	Not Found	Not Found	Not Found	Not Found	Not Found
	FALSE	High	[K].APEVDIK.[G]	1xTMT6plex [K7]; 1xTMT6plex [N-Term]		FALSE	0.00854665	0.00126084	1	2	3	Q09666	Q09666 [4032-4038]	0	1229.75	1	1.583	1.075	1.603	1.467	1	1	1	1	135.3	103.6	85.4	70.6	113.2	91.8	29.22	49.18	28.8	5.18	24.18	21.78		Not Found	High	Not Found	Not Found	Not Found	Medium	Not Found	Not Found	Not Found	Not Found	Not Found	Not Found
	FALSE	High	[K].GDISISGPK.[V]	1xTMT6plex [N-Term]		FALSE	0.00866549	0.00128335	1	2	2	Q09666	Q09666 [655-663]	0	1102.63	0	1.421	1.137	1.456	0.939					137.1	71	96.5	75.6	110.1	109.7								Not Found	Not Found	Not Found	Not Found	Not Found	Not Found	Not Found	Not Found	Not Found	Not Found	Not Found	High
	FALSE	High	[K].FGTFGGLGSK.[S]			FALSE	0.00866549	0.00128335	1	1	2	Q09666	Q09666 [5822-5831]	0	970.499	0																					No Quan Labels	Not Found	Not Found	Not Found	Not Found	Not Found	Not Found	Not Found	Not Found	Not Found	Not Found	Not Found	Not Found
	FALSE	High	[K].GPEADIK.[G]	1xTMT6plex [K7]; 1xTMT6plex [N-Term]		FALSE	0.00872542	0.00129413	1	2	4	Q09666	Q09666 [4752-4758]	0	1187.7	0	1.76	1.104	1.529	1.239	1	1	1	1	164.3	78.6	93.4	63.5	97.1	103.1	0.84	14.01	10.27	5.05	8.54	4.87		Not Found	Not Found	Not Found	Not Found	Not Found	Not Found	Not Found	Not Found	Not Found	High	High	Not Found
	FALSE	High	[K].GPEVDVSGPK.[L]	1xTMT6plex [N-Term]		FALSE	0.00896862	0.00136249	1	1	2	Q09666	Q09666 [3331-3340]	0	1213.66	0	1.001	0.944	0.924	0.994					98.6	105.6	98.4	106.3	98.2	92.9								Not Found	Not Found	Not Found	Not Found	Not Found	Not Found	Not Found	Not Found	High	Not Found	Not Found	Not Found
	FALSE	High	[K].ADVDVSGPK.[MV]	1xTMT6plex [N-Term]		FALSE	0.00940805	0.00144007	1	2	2	Q09666	Q09666 [1409-1417]; [2270-2278]; [2921-2929]	0	1116.61	0	1.51	0.97	2.316	1.156					159.2	60.3	105.4	52.1	120.7	102.2								Not Found	Not Found	Not Found	Not Found	Not Found	Not Found	Not Found	Not Found	High	Not Found	Not Found	Not Found
	FALSE	High	[K].GDMDVSLPK.[V]	1xOxidation [M3]; 1xTMT6plex [K9]; 1xTMT6plex [N-Term]		FALSE	0.0104136	0.00155086	1	1	2	Q09666	Q09666 [3107-3115]; [3889-3897]	0	1435.79	0	1.514	1.238	1.08	0.722					153.7	56.4	101.5	78.2	84.5	125.7								Not Found	Not Found	Not Found	Not Found	Not Found	Not Found	Not Found	Not Found	Not Found	Not Found	Not Found	High
	FALSE	High	[K].FGTFGGLGSK.[S]	1xPhospho [T3]; 1xTMT6plex [N-Term]; 1xTMT6plex [K10]	Q09666 1xPhospho [T5824]	FALSE	0.0106259	0.00158245	1	1	2	Q09666	Q09666 [5822-5831]	0	1279.63	0	0.045	0.071	0.174	0.262					4.8	87.4	107.9	334	58.2	7.7								Not Found	Not Found	High	Not Found	Not Found	Not Found	Not Found	Not Found	Not Found	Not Found	Not Found	Not Found
	FALSE	High	[K].DIDISSPEFK.[I]	1xPhospho [S]; 1xTMT6plex [K10]; 1xTMT6plex [N-Term]	Q09666 1xPhospho [S]	FALSE	0.0112122	0.00170083	1	2	6	Q09666	Q09666 [172-181]	0	1688.85	0	1.078	0.974	0.446	0.504	1	1	1	1	146.1	48.1	135.6	95.5	42.6	132.1	2.26	3.33	2.15	0.46	0.54	5.42		Not Found	Not Found	Not Found	Not Found	Not Found	Not Found	Not Found	Not Found	High	High	Not Found	Not Found
	FALSE	High	[K].GDVVVSLPK.[V]	1xTMT6plex [K9]; 1xTMT6plex [N-Term]		FALSE	0.0113634	0.0017567	1	1	2	Q09666	Q09666 [3687-3695]	0	1371.86	0	1.559	0.996	1.985	1.339					154.5	76.7	99.1	57.3	113.7	98.8								Not Found	Not Found	Not Found	Not Found	Not Found	Not Found	Not Found	Not Found	High	Not Found	Not Found	Not Found
	FALSE	High	[K].FGVSTGR.[E]	1xTMT6plex [N-Term]		FALSE	0.0116719	0.00177698	1	2	2	Q09666	Q09666 [314-320]	0	952.541	0	1.759	0.983	2.063	1.444					174.5	73.3	99.2	50.7	104.7	97.6								Not Found	Not Found	Not Found	Not Found	Not Found	Not Found	Not Found	Not Found	High	Not Found	Not Found	Not Found
	FALSE	High	[K].VDINTPDVDVHGPDWHLK.[M]	1xTMT6plex [K18]; 1xTMT6plex [N-Term]		FALSE	0.0116719	0.00177698	1	2	2	Q09666	Q09666 [4762-4779]	0	2515.33	0	1.051	0.694	1.426	1.377					112.6	110.7	107.2	80.4	114.7	74.4								Not Found	Not Found	Not Found	Not Found	High	Not Found	Not Found	Not Found	Not Found	Not Found	Not Found	Not Found
	FALSE	High	[K].ISMPDVDLHLK.[G]	1xOxidation [M3]; 1xTMT6plex [K11]; 1xTMT6plex [N-Term]		FALSE	0.0116719	0.00177698	1	3	5	Q09666	Q09666 [818-828]; [1195-1205]; [1653-1663]; [1855-1865]; [1922-1932]; [1989-1999]; [2117-2127]	0	1741.99	0	1.925	1.021	1.818	1.007	1	1	1	1	180.9	60.3	94	59.9	108.9	95.9	34.75	26.78	19.49	38.16	4.81	13.19		High	Not Found	Not Found	Not Found	Not Found	Not Found	High	High	Not Found	Not Found	Not Found	Not Found
	FALSE	High	[K].GPAFNMASPESDFGINLK.[G]	1xOxidation [M6]; 1xTMT6plex [N-Term]		FALSE	0.0117502	0.00177698	1	2	2	Q09666	Q09666 [5545-5562]	0	2140.06	0	1.69	0.771	1.542	0.99					158	77.5	93.5	78.3	120.7	72								Not Found	Not Found	Not Found	Not Found	Not Found	High	Not Found	Not Found	Not Found	Not Found	Not Found	Not Found
	FALSE	High	[K].MPSLEISAPK.[V]	1xPhospho [S3]; 1xOxidation [M1]; 1xTMT6plex [K10]; 1xTMT6plex [N-Term]	Q09666 1xPhospho [S4908]	FALSE	0.012069	0.00179874	1	2	3	Q09666	Q09666 [4906-4915]	0	1626.86	0	0.567	1.032	0.311	0.314	1	1	1	1	80.9	44.2	142.7	141	43.9	147.3	4.08	4.26	10.71	2.87	0.96	4.43		High	Not Found	Not Found	Not Found	Not Found	Not Found	Not Found	Not Found	Not Found	Not Found	Not Found	Medium
	FALSE	High	[K].GDVDVSVPEVEGK.[L]	1xTMT6plex [N-Term]		FALSE	0.0123963	0.00186987	1	2	2	Q09666	Q09666 [2469-2481]	0	1558.82	0	0.668	0.649	1.814	1.221					95.6	81.2	143.2	66.5	120.6	93								Not Found	Not Found	Not Found	Not Found	Not Found	Not Found	Not Found	High	Not Found	Not Found	Not Found	Not Found
	FALSE	High	[K].FGTFGGLGSK.[S]	1xPhospho [T3]; 1xTMT6plex [K10]; 1xTMT6plex [N-Term]	Q09666 1xPhospho [T5824]	FALSE	0.0125633	0.00186987	1	1	2	Q09666	Q09666 [5822-5831]	0	1508.79	0	0.064	0.074	0.176	0.338					5.2	113.4	81.4	335	59	6								Not Found	Not Found	Not Found	Not Found	Not Found	Not Found	Not Found	Not Found	Not Found	Not Found	Not Found	High
	FALSE	High	[K].GDVDISLPK.[VL]	1xTMT6plex [N-Term]		FALSE	0.0124795	0.00186987	1	1	4	Q09666	Q09666 [2979-2987]; [3559-3567]	0	1172.67	0	1.495	1.036	1.853	1.016	1	1	1	1	153	62.7	102.3	61.7	114.3	106	3.81	16.7	8.79	10.39	3.78	2.08		Not Found	Not Found	Not Found	Not Found	Not Found	Not Found	Not Found	Not Found	Not Found	Not Found	High	High
	FALSE	High	[K].GSGGEWK.[G]	1xTMT6plex [K7]; 1xTMT6plex [N-Term]		FALSE	0.012991	0.00196571	1	2	2	Q09666	Q09666 [5592-5598]	0	1178.66	0	1.394	1.415	0.914	1.064					125.8	91.5	90.3	86	78.6	127.7								Not Found	Not Found	Not Found	High	Not Found	Not Found	Not Found	Not Found	Not Found	Not Found	Not Found	Not Found
	FALSE	High	[K].ISMPDFDLHLK.[G]	1xOxidation [M3]; 1xTMT6plex [K11]; 1xTMT6plex [N-Term]		FALSE	0.013344	0.00197584	1	4	2	Q09666	Q09666 [2579-2589]; [4001-4011]; [4257-4267]; [4459-4469]	0	1789.99	0	1.727	0.767	1.602	0.809					180.3	55.8	104.4	69	110.5	80.1								Not Found	Not Found	Not Found	Not Found	Not Found	Not Found	Not Found	Not Found	Not Found	Not Found	High	Not Found
	FALSE	High	[K].VPDVDIK.[GE]	1xTMT6plex [K7]; 1xTMT6plex [N-Term]		FALSE	0.0137072	0.0020065	2	4	2	Q09666; A8K171	Q09666 [1354-1360]; [1684-1690]; [2020-2026]; [3122-3128]; A8K171 [475-481]	0	1243.77	0	1.486	0.942	1.181	0.908					157.2	69.8	105.8	76.8	90.7	99.6							Shared	Not Found	Not Found	Not Found	Not Found	High	Not Found	Not Found	Not Found	Not Found	Not Found	Not Found	Not Found
	FALSE	High	[K].ISMPDFDLHLK.[G]	1xPhospho [S2]; 1xOxidation [M3]; 1xTMT6plex [K11]; 1xTMT6plex [N-Term]	Q09666 1xPhospho [S2580]; 1xPhospho [S6580]; 1xPhospho [S10836]; 1xPhospho [S15294]	FALSE	0.0146627	0.00214023	1	4	2	Q09666	Q09666 [2579-2589]; [4001-4011]; [4257-4267]; [4459-4469]	0	1869.96	0	0.306	0.67	0.174	0.156	1	1	0.545	0.464804	66.3	20.1	216.8	129.1	22.5	145.2	7.76	24.29	15.86	10.71	9.2	5.88		Not Found	Not Found	Not Found	High	High	Not Found	Not Found	Not Found	Not Found	Not Found	Not Found	Not Found
	FALSE	High	[K].SPQISMSDIDLNLK.[G]	1xPhospho [S]; 1xOxidation [M6]; 1xTMT6plex [K14]; 1xTMT6plex [N-Term]	Q09666 1xPhospho [S]	FALSE	0.0149635	0.00214499	1	3	6	Q09666	Q09666 [4516-4529]	0	2115.08	0	0.712	0.794	0.717	0.529	1	1	1	1	97.9	60.1	137.6	113.6	81.5	109.3	10.97	65.69	46.48	46.8	74.18	2.12		Not Found	High	Not Found	Not Found	Not Found	Not Found	Not Found	Not Found	Not Found	Not Found	Not Found	High
	FALSE	High	[K].VEAPSLDVHMDSPDINIEGPDVK.[I]	1xPhospho [S12]; 1xOxidation [M10]; 1xTMT6plex [K23]; 1xTMT6plex [N-Term]	Q09666 1xPhospho [S4960]	FALSE	0.0152711	0.00215425	1	2	1	Q09666	Q09666 [4949-4971]	0	3031.47	0	0.484	0.484	0.467	0.849					74.3	109.3	153.3	128.7	60.2	74.1								Not Found	Not Found	Not Found	Not Found	Not Found	Not Found	Not Found	Not Found	Not Found	High	Not Found	Not Found
	FALSE	High	[R].ISAPNVDFNLEGPK.[V]	1xPhospho [S2]	Q09666 1xPhospho [S5448]	FALSE	0.0152711	0.00215425	1	2	3	Q09666	Q09666 [5447-5460]	0	1580.74	0																					No Quan Labels	Not Found	Not Found	Not Found	Not Found	Not Found	Not Found	Not Found	High	Not Found	Not Found	Not Found	Not Found
	FALSE	High	[K].ISMPEIDLNLK.[G]	1xOxidation [M3]; 1xTMT6plex [K11]; 1xTMT6plex [N-Term]		FALSE	0.0161258	0.00227237	1	1	2	Q09666	Q09666 [3293-3303]	0	1747.01	0	2.022	1.087	1.549	0.802					186.3	53	92.1	66.1	102.4	100.1								Not Found	Not Found	Not Found	Not Found	Not Found	Not Found	Not Found	Not Found	High	Not Found	Not Found	Not Found
	FALSE	High	[K].FNFSGSK.[V]	1xTMT6plex [K7]; 1xTMT6plex [N-Term]		FALSE	0.0163476	0.00230139	1	1	2	Q09666	Q09666 [3357-3363]	0	1244.7	0	1.255	1.058	1.743	1.344					133.8	81.2	106.6	60.4	105.3	112.8								Not Found	Not Found	Not Found	Not Found	Not Found	Not Found	High	Not Found	Not Found	Not Found	Not Found	Not Found
	FALSE	High	[R].EMGVDVHFPK.[A]	1xOxidation [M2]; 1xTMT6plex [K10]; 1xTMT6plex [N-Term]		FALSE	0.0169166	0.00237021	1	2	2	Q09666	Q09666 [5677-5686]	0	1632.88	0	1.607	1.321	0.922	0.674					164.5	51.4	102.3	76.3	70.3	135.2								Not Found	Not Found	High	Not Found	Not Found	Not Found	Not Found	Not Found	Not Found	Not Found	Not Found	Not Found
	FALSE	High	[K].GEYDVTMPK.[V]	1xOxidation [M7]; 1xTMT6plex [K9]; 1xTMT6plex [N-Term]		FALSE	0.0169166	0.00237021	1	2	1	Q09666	Q09666 [834-842]	0	1513.8	0	1.463	1.016	1.65	1.25					143.8	82.7	98.3	66.2	109.2	99.8								Not Found	High	Not Found	Not Found	Not Found	Not Found	Not Found	Not Found	Not Found	Not Found	Not Found	Not Found
	FALSE	High	[K].ISMQDVDLSLGSPK.[L]	1xPhospho [S12]; 1xTMT6plex [N-Term]	Q09666 1xPhospho [S511]	FALSE	0.0172682	0.00246452	1	2	1	Q09666	Q09666 [500-513]	0	1798.89	0	0.21	0.183	0.59	0.47					46.8	66.1	222.7	140.6	83	40.8								Not Found	Not Found	Not Found	High	Not Found	Not Found	Not Found	Not Found	Not Found	Not Found	Not Found	Not Found
	FALSE	High	[K].GPEVDIK.[G]	1xTMT6plex [K7]; 1xTMT6plex [N-Term]		FALSE	0.0177494	0.0025097	1	4	4	Q09666	Q09666 [2610-2616]; [2738-2744]; [2866-2872]; [3574-3580]; [3702-3708]; [3776-3782]; [4160-4166]; [4288-4294]; [4880-4886]	0	1215.73	0	1.454	1.01	1.518	1.066					152.6	70.3	105	66	100.1	106								High	Not Found	Not Found	Not Found	Not Found	Not Found	Not Found	Not Found	Not Found	Not Found	Not Found	Not Found
	FALSE	High	[K].VTAPDVDLHLK.[A]	1xTMT6plex [K11]; 1xTMT6plex [N-Term]		FALSE	0.0188852	0.00270861	1	2	2	Q09666	Q09666 [4916-4926]	0	1665.99	0																					No Quan Values	Not Found	Not Found	Not Found	Not Found	Not Found	Not Found	Not Found	High	Not Found	Not Found	Not Found	Not Found
	FALSE	High	[K].FSVSGAK.[G]	1xTMT6plex [K7]; 1xTMT6plex [N-Term]		FALSE	0.0192807	0.00275387	1	2	2	Q09666	Q09666 [439-445]	0	1153.7	0	1.508	1.027	1.718	1.173					153.6	72.4	101.8	61.7	106	104.6								Not Found	Not Found	High	Not Found	Not Found	Not Found	Not Found	Not Found	Not Found	Not Found	Not Found	Not Found
	FALSE	High	[K].MPEMNIK.[AV]	1xTMT6plex [K7]; 1xTMT6plex [N-Term]		FALSE	0.0195493	0.00277045	1	5	4	Q09666	Q09666 [808-814]; [936-942]; [2569-2575]; [2697-2703]; [2953-2959]; [3081-3087]; [3209-3215]; [3661-3667]; [3863-3869]; [3991-3997]; [4247-4253]; [4375-4381]; [4449-4455]	0	1320.74	0	1.781	1.053	1.965	2.185	1	1	1	1	154.7	113.3	86.9	51.8	101.9	91.5	13.11	13.5	2.43	4.64	8.07	19.23		Not Found	Not Found	Not Found	Not Found	Not Found	Not Found	Not Found	Not Found	Not Found	Not Found	Medium	High
	FALSE	High	[K].GPEIDIK.[G]	1xTMT6plex [K7]; 1xTMT6plex [N-Term]		FALSE	0.0200986	0.00285675	2	4	2	Q09666; Q8IVF2	Q09666 [4416-4422]; Q8IVF2 [1428-1434]; [2253-2259]; [3903-3909]	0	1229.75	0	1.38	1.072	1.201	0.959					147.9	69.8	107.2	72.8	87.4	114.9							Shared	Not Found	High	Not Found	Not Found	Not Found	Not Found	Not Found	Not Found	Not Found	Not Found	Not Found	Not Found
	FALSE	High	[K].ADIKSPSLDVTVPEAELNLETPEISVGGK.[G]	1xPhospho [S]	Q09666 1xPhospho [S]	FALSE	0.0211012	0.00308677	1	2	3	Q09666	Q09666 [4989-5017]	1	3088.53	0																					No Quan Labels	Not Found	Not Found	Not Found	Not Found	Not Found	Not Found	Not Found	Not Found	Not Found	Not Found	Not Found	Not Found
	FALSE	High	[K].ISMPDIDLNLTGPK.[I]	1xOxidation [M3]; 1xTMT6plex [K14]; 1xTMT6plex [N-Term]		FALSE	0.0216995	0.00320244	1	1	2	Q09666	Q09666 [2835-2848]	0	1988.11	0	1.029	0.731	1.025	0.819					122.3	78.3	118.8	95.6	98	86.9								Not Found	Not Found	Not Found	Not Found	Not Found	Not Found	Not Found	Not Found	High	Not Found	Not Found	Not Found
	FALSE	High	[K].ADVVVSGPK.[V]			FALSE	0.022006	0.00321042	1	2	2	Q09666	Q09666 [1153-1161]; [2075-2083]	0	871.488	0																					No Quan Labels	Not Found	Not Found	Not Found	Not Found	Not Found	High	Not Found	Not Found	Not Found	Not Found	Not Found	Not Found
	FALSE	High	[K].MPEMHFK.[TA]	1xOxidation [M4]; 1xTMT6plex [K7]; 1xTMT6plex [N-Term]		FALSE	0.0221611	0.00321782	1	2	6	Q09666	Q09666 [1185-1191]; [1313-1319]; [1643-1649]; [1845-1851]; [1979-1985]; [2107-2113]; [2174-2180]; [2302-2308]; [2825-2831]	0	1393.74	0	1.579	0.895	2.007	1.542	1	1	0.572669	1	153.8	88.7	97.4	57.5	115.4	87.2	17.21	26.9	6.14	15.26	1.14	15.7		Not Found	High	Not Found	Not Found	Not Found	Not Found	Not Found	Medium	Not Found	Not Found	Not Found	Not Found
	FALSE	High	[K].FSVSGLK.[A]	1xTMT6plex [K7]; 1xTMT6plex [N-Term]		FALSE	0.0232841	0.00341216	1	1	2	Q09666	Q09666 [3482-3488]	0	1195.75	0	1.642	0.844	2.276	1.664					157	89.9	95.6	54	122.9	80.6								Not Found	Not Found	Not Found	Not Found	Not Found	Not Found	High	Not Found	Not Found	Not Found	Not Found	Not Found
	FALSE	High	[K].GDRSPEPGQTWTR.[E]	1xPhospho [S4]; 1xTMT6plex [N-Term]	Q09666 1xPhospho [S93]	FALSE	0.0236174	0.00345853	1	8	3	Q09666	Q09666 [90-102]	1	1795.83	0	1.315	1.148	0.753	0.645	1	1	1	1	179.8	34	136.7	52.8	39.7	157	0.3	0.24	1.27	14.47	0.59	4.23		Not Found	Not Found	Not Found	Not Found	Not Found	Not Found	High	Medium	Not Found	Not Found	Not Found	Not Found
	FALSE	High	[K].VEGDMQVPDLDIK.[G]	1xTMT6plex [K13]; 1xTMT6plex [N-Term]		FALSE	0.0239566	0.00349499	1	1	1	Q09666	Q09666 [3898-3910]	0	1917.04	0	1.007	0.433	1.767	1.591					125.4	108.1	124.6	67.9	120	53.9								Not Found	High	Not Found	Not Found	Not Found	Not Found	Not Found	Not Found	Not Found	Not Found	Not Found	Not Found
	FALSE	High	[K].GPQVALK.[G]	1xTMT6plex [K7]; 1xTMT6plex [N-Term]		FALSE	0.0246531	0.003534	1	2	2	Q09666	Q09666 [531-537]	0	1170.76	0	1.842	1.145	1.684	1.322					161.3	82.8	87.6	62.6	105.5	100.3								Not Found	Not Found	Not Found	Not Found	Not Found	Not Found	Not Found	Not Found	Not Found	High	Not Found	Not Found
	FALSE	High	[K].ISMQDVDLSLGSPK.[L]	1xPhospho [S12]; 1xOxidation [M3]; 1xTMT6plex [K14]; 1xTMT6plex [N-Term]	Q09666 1xPhospho [S511]	FALSE	0.0251921	0.00361634	1	2	2	Q09666	Q09666 [500-513]	0	2044.04	0	0.45	0.584	0.397	0.379					68.6	61.8	152.7	163	64.7	89.1								Not Found	High	Not Found	Not Found	Not Found	Not Found	Not Found	Not Found	Not Found	Not Found	Not Found	Not Found
	FALSE	High	[K].DIDISSPEFK.[I]	1xTMT6plex [N-Term]		FALSE	0.0257459	0.00365189	1	2	2	Q09666	Q09666 [172-181]	0	1379.73	0	0.724	0.771	1.051	1.22					93.8	103.2	129.6	84.6	88.9	99.9								Not Found	Not Found	Not Found	Not Found	Not Found	Not Found	Not Found	Not Found	Not Found	Not Found	High	Not Found
	FALSE	High	[K].GDLDIAGPNLEGDFK.[G]	1xTMT6plex [N-Term]		FALSE	0.0267032	0.00367075	1	1	2	Q09666	Q09666 [3431-3445]	0	1789.92	0	1.026	0.887	1.702	1.066					121.6	72.1	118.5	67.6	115.1	105.1								Not Found	Not Found	Not Found	Not Found	Not Found	Not Found	Not Found	Not Found	Not Found	High	Not Found	Not Found
	FALSE	High	[K].AEAPLPSPK.[L]	1xPhospho [S7]; 1xTMT6plex [K9]; 1xTMT6plex [N-Term]	Q09666 1xPhospho [S5110]	FALSE	0.0281189	0.00379545	1	2	4	Q09666	Q09666 [5104-5112]	0	1447.8	0	0.368	0.477	0.516	0.512	0.0549509	0.164997	0.0942134	0.0848956	53.3	83.9	145	163.9	84.6	69.2	0.18	17.53	8.05	2.22	7.95	0.09		Not Found	Not Found	Not Found	Not Found	Not Found	Not Found	Not Found	Not Found	Not Found	High	High	Not Found
	FALSE	High	[K].VDVEVPDVSLEGPEGK.[L]			FALSE	0.0289697	0.0039164	1	2	2	Q09666	Q09666 [1290-1305]; [2084-2099]; [2279-2294]	0	1668.83	0																					No Quan Labels	Not Found	Not Found	Not Found	Not Found	Not Found	Not Found	High	Not Found	Not Found	Not Found	Not Found	Not Found
	FALSE	High	[K].DIDISSPEFK.[I]	1xPhospho [S6]	Q09666 1xPhospho [S177]	FALSE	0.0298525	0.0039734	1	2	2	Q09666	Q09666 [172-181]	0	1230.53	0																					No Quan Labels	Not Found	Not Found	Not Found	Not Found	Not Found	Not Found	Not Found	Not Found	Not Found	Not Found	Not Found	Not Found
	FALSE	High	[K].MPEMHFK.[TA]	1xTMT6plex [K7]; 1xTMT6plex [N-Term]		FALSE	0.0305364	0.00401154	1	2	2	Q09666	Q09666 [1185-1191]; [1313-1319]; [1643-1649]; [1845-1851]; [1979-1985]; [2107-2113]; [2174-2180]; [2302-2308]; [2825-2831]	0	1377.74	0	1.386	0.712	2.502	2.229					144.4	107.9	104.1	48.4	121	74.2								Not Found	High	Not Found	Not Found	Not Found	Not Found	Not Found	Not Found	Not Found	Not Found	Not Found	Not Found
	FALSE	High	[K].SSKASLGSLEGEAEAEASSPK.[G]	2xPhospho [S5; S]; TMT6plex [K]; 1xTMT6plex [N-Term]	Q09666 2xPhospho [S5749; S]	FALSE	0.0305364	0.00401154	1	1	4	Q09666	Q09666 [5745-5765]	1	2653.24	0																					No Quan Values	Not Found	Not Found	Not Found	Not Found	Not Found	Not Found	High	Not Found	Not Found	Not Found	Not Found	Not Found
	FALSE	High	[K].LQVTMPGIK.[V]	1xOxidation [M5]; 1xTMT6plex [K9]; 1xTMT6plex [N-Term]		FALSE	0.0307686	0.00402911	1	2	1	Q09666	Q09666 [244-252]	0	1460.89	0	1.565	1.074	1.054	0.58					172.9	43.6	110.5	75.2	79.3	118.7								Not Found	High	Not Found	Not Found	Not Found	Not Found	Not Found	Not Found	Not Found	Not Found	Not Found	Not Found
	FALSE	High	[K].GEGPEVDVK.[L]	1xTMT6plex [N-Term]		FALSE	0.0317194	0.00415716	1	1	2	Q09666	Q09666 [1397-1405]	0	1158.62	0	1.475	0.838	2.128	1.496					141.9	91	96.2	60.9	129.5	80.6								Not Found	Not Found	Not Found	Not Found	Not Found	Not Found	High	Not Found	Not Found	Not Found	Not Found	Not Found
	FALSE	High	[K].ISMPDLDLNLK.[G]			FALSE	0.0327065	0.00424317	1	2	4	Q09666	Q09666 [2707-2717]; [3091-3101]; [3219-3229]; [3543-3553]; [3745-3755]; [3873-3883]; [4721-4731]	0	1258.67	0																					No Quan Labels	Not Found	Not Found	Not Found	Not Found	Not Found	Not Found	Not Found	Not Found	Not Found	Not Found	Not Found	Not Found
	FALSE	High	[K].MPEMNIK.[AV]	1xTMT6plex [N-Term]		FALSE	0.0327065	0.00424317	1	5	2	Q09666	Q09666 [808-814]; [936-942]; [2569-2575]; [2697-2703]; [2953-2959]; [3081-3087]; [3209-3215]; [3661-3667]; [3863-3869]; [3991-3997]; [4247-4253]; [4375-4381]; [4449-4455]	0	1091.58	0	1.565	0.823	2.944	1.844					146.7	89.9	93.7	48.8	143.7	77.1								Not Found	Not Found	Not Found	Not Found	Not Found	High	Not Found	Not Found	Not Found	Not Found	Not Found	Not Found
	FALSE	High	[K].MEGGGAEVHAQLPSLEGDLRGPDVK.[L]	1xPhospho [S14]; 1xOxidation [M1]; 1xTMT6plex [K25]; 1xTMT6plex [N-Term]	Q09666 1xPhospho [S5261]	FALSE	0.0334714	0.00434135	1	2	1	Q09666	Q09666 [5248-5272]	1	3116.55	0																					No Quan Values	Not Found	Not Found	Not Found	Not Found	Not Found	Not Found	Not Found	Not Found	High	Not Found	Not Found	Not Found
	FALSE	High	[K].GLDLGGR.[G]	1xTMT6plex [N-Term]		FALSE	0.0342581	0.00437368	1	2	2	Q09666	Q09666 [264-270]	0	916.541	0	1.583	0.963	1.415	1.132					159.4	77.5	100.7	68.5	96.9	97								Not Found	Not Found	Not Found	High	Not Found	Not Found	Not Found	Not Found	Not Found	Not Found	Not Found	Not Found
	FALSE	High	[K].MPEMHFK.[TA]	2xOxidation [M1; M4]; 1xTMT6plex [K7]; 1xTMT6plex [N-Term]		FALSE	0.0350669	0.00445276	1	2	1	Q09666	Q09666 [1185-1191]; [1313-1319]; [1643-1649]; [1845-1851]; [1979-1985]; [2107-2113]; [2174-2180]; [2302-2308]; [2825-2831]	0	1409.73	0	1.448	1.444	0.802	0.462					153.6	38.2	106.1	82.6	66.3	153.2								Not Found	Not Found	High	Not Found	Not Found	Not Found	Not Found	Not Found	Not Found	Not Found	Not Found	Not Found
	FALSE	High	[K].FSMPGFK.[GA]	1xTMT6plex [K7]; 1xTMT6plex [N-Term]		FALSE	0.0353415	0.00452033	1	5	6	Q09666	Q09666 [885-891]; [1262-1268]; [1390-1396]; [1518-1524]; [1720-1726]; [2056-2062]; [2251-2257]; [2518-2524]; [2646-2652]; [2902-2908]; [3030-3036]; [3610-3616]; [3812-3818]; [4068-4074]; [4196-4202]; [4324-4330]; [4660-4666]; [4788-4794]	0	1271.72	0	1.189	0.503	2.698	2.158	1	1	0.220936	0.476338	123.5	118.1	103.9	54.7	147.6	52.2	8.51	12.12	7.51	15.82	1.96	3.51		Not Found	Not Found	Not Found	Not Found	Not Found	Not Found	Not Found	Not Found	Not Found	Not Found	High	High
	FALSE	High	[K].MPDVDISVPK.[I]	1xTMT6plex [N-Term]		FALSE	0.0356186	0.00454632	1	2	2	Q09666	Q09666 [5145-5154]	0	1329.73	0	0.928	0.581	1.695	1.289					106.5	101	114.7	78.3	132.8	66.7								Not Found	Not Found	Not Found	High	Not Found	Not Found	Not Found	Not Found	Not Found	Not Found	Not Found	Not Found
	FALSE	High	[K].ISMPGFK.[G]	1xTMT6plex [N-Term]		FALSE	0.0356186	0.00454632	1	1	2	Q09666	Q09666 [2774-2780]; [3158-3164]; [3940-3946]	0	1008.57	0	1.05	0.643	2.762	1.616					115.8	91	110.4	56.3	155.5	71								Not Found	High	Not Found	Not Found	Not Found	Not Found	Not Found	Not Found	Not Found	Not Found	Not Found	Not Found
	FALSE	High	[R].VDIETPNLEGTLTGPR.[L]			FALSE	0.0361806	0.00461957	1	2	2	Q09666	Q09666 [541-556]	0	1711.89	0																					No Quan Labels	Not Found	Not Found	Not Found	Not Found	Not Found	Not Found	Not Found	Not Found	Not Found	Not Found	Not Found	Not Found
	FALSE	High	[K].GDVDVSLPK.[VML]	1xTMT6plex [K9]; 1xTMT6plex [N-Term]		FALSE	0.0367528	0.00467177	1	4	3	Q09666	Q09666 [2133-2141]; [2595-2603]; [2723-2731]; [3761-3769]; [4017-4025]; [4145-4153]; [4273-4281]; [4401-4409]; [4475-4483]	0	1158.66	0	1.526	0.897	1.738	1.108	1	1	1	1	156.1	72	102.3	65	113	91.7	1.21	3.1	0.49	29.16	11.55	6.68		Not Found	Not Found	Not Found	Not Found	Not Found	Not Found	Not Found	Not Found	Medium	High	Not Found	Not Found
	FALSE	High	[K].VDVEVPDVSLEGPEGK.[L]	1xPhospho [S9]; 1xTMT6plex [N-Term]	Q09666 1xPhospho [S1298]; 1xPhospho [S3381]; 1xPhospho [S5659]	FALSE	0.0370429	0.00469796	1	2	2	Q09666	Q09666 [1290-1305]; [2084-2099]; [2279-2294]	0	1977.96	0	0.518	0.695	0.518	0.352					92.2	38.9	177.8	110.5	57.2	123.5								Not Found	Not Found	Not Found	Not Found	Not Found	Not Found	Not Found	High	Not Found	Not Found	Not Found	Not Found
	FALSE	High	[K].FNFSGSK.[V]	1xTMT6plex [N-Term]		FALSE	0.0382297	0.00479945	1	1	2	Q09666	Q09666 [3357-3363]	0	1015.54	0	1.425	0.976	1.663	0.943					157	58.9	110.2	62.5	103.9	107.6								Not Found	Not Found	Not Found	Not Found	Not Found	Not Found	Not Found	Not Found	Not Found	Not Found	Not Found	High
	FALSE	High	[R].LGSPSGK.[T]	1xTMT6plex [N-Term]		FALSE	0.0391482	0.00487792	1	2	2	Q09666	Q09666 [557-563]	0	874.52	0	1.305	1.044	1.256	0.59					146.9	46.2	112.6	78.4	98.4	117.5								Not Found	Not Found	High	Not Found	Not Found	Not Found	Not Found	Not Found	Not Found	Not Found	Not Found	Not Found
	FALSE	High	[K].MPDVHFK.[S]	1xTMT6plex [K7]; 1xTMT6plex [N-Term]		FALSE	0.0455614	0.00541379	1	3	2	Q09666	Q09666 [4509-4515]	0	1331.75	0	1.47	0.842	2.482	1.891					150.3	92	102.3	48.6	120.7	86.1								High	Not Found	Not Found	Not Found	Not Found	Not Found	Not Found	Not Found	Not Found	Not Found	Not Found	Not Found
	FALSE	High	[K].ISMPDFDLHLK.[G]			FALSE	0.0459287	0.00544843	1	4	2	Q09666	Q09666 [2579-2589]; [4001-4011]; [4257-4267]; [4459-4469]	0	1315.67	0																					No Quan Labels	Not Found	Not Found	Not Found	Not Found	Not Found	Not Found	Not Found	Not Found	Not Found	Not Found	Not Found	Not Found
	FALSE	High	[KE].VEGEMK.[V]	1xTMT6plex [K6]; 1xTMT6plex [N-Term]		FALSE	0.0489802	0.00577276	1	2	2	Q09666	Q09666 [1220-1225]; [1348-1353]; [1678-1683]; [2014-2019]; [2209-2214]	0	1150.65	0	1.542	0.967	1.583	1.219	1	1	1	1	158.7	76.6	102.9	62.8	99.5	99.5	3.83	16.33	12.26	2.58	5.7	1.96		Not Found	Not Found	Not Found	Not Found	Not Found	Not Found	Not Found	Not Found	Not Found	Not Found	Medium	High
	FALSE	High	[K].LNVGAPDVTLR.[G]			FALSE	0.0493759	0.00584609	1	2	2	Q09666	Q09666 [5356-5366]	0	1154.65	0																					No Quan Labels	Not Found	Not Found	Not Found	Not Found	Not Found	Not Found	Not Found	Not Found	High	Not Found	Not Found	Not Found
	FALSE	High	[K].GDLDASVPSMK.[V]	1xOxidation [M10]; 1xTMT6plex [K11]; 1xTMT6plex [N-Term]		FALSE	0.0497748	0.00588058	1	2	2	Q09666	Q09666 [5313-5323]	0	1593.86	0	1.216	1.794	1.039	0.791					118.5	58.5	97.4	74	76.9	174.8								Not Found	Not Found	Not Found	Not Found	Not Found	Not Found	Not Found	Not Found	Not Found	Not Found	Not Found	High
	FALSE	High	[K].GDVDVSAPK.[L]	1xTMT6plex [N-Term]		FALSE	0.0518179	0.00610891	1	2	1	Q09666	Q09666 [2328-2336]	0	1116.61	1	1.05	1.242	0.734	0.698					117	66.9	111.4	95.9	70.3	138.4								Not Found	Not Found	Not Found	Not Found	Not Found	Not Found	Not Found	High	Not Found	Not Found	Not Found	Not Found
	FALSE	High	[K].VPDVDIK.[GE]	1xTMT6plex [N-Term]		FALSE	0.053083	0.00620936	2	4	3	Q09666; A8K171	Q09666 [1354-1360]; [1684-1690]; [2020-2026]; [3122-3128]; A8K171 [475-481]	0	1014.6	0	1.494	1.029	1.77	0.857	1	1	1	1	160.5	52.4	107.4	61.1	108.1	110.5	4.58	6.04	4.16	5.81	2.36	0.05	Shared	High	Not Found	Not Found	Not Found	Not Found	Not Found	Not Found	Not Found	Not Found	Not Found	Not Found	High
	FALSE	High	[K].FSMPGFK.[GA]	1xOxidation [M3]; 1xTMT6plex [N-Term]; 1xTMT6plex [K7]		FALSE	0.0552578	0.0065317	1	5	2	Q09666	Q09666 [885-891]; [1262-1268]; [1390-1396]; [1518-1524]; [1720-1726]; [2056-2062]; [2251-2257]; [2518-2524]; [2646-2652]; [2902-2908]; [3030-3036]; [3610-3616]; [3812-3818]; [4068-4074]; [4196-4202]; [4324-4330]; [4660-4666]; [4788-4794]	0	1058.55	0	2.017	1.667	1.139	0.518					178.5	36.2	88.5	69.8	79.5	147.5								Not Found	Not Found	Not Found	Not Found	High	Not Found	Not Found	Not Found	Not Found	Not Found	Not Found	Not Found
	FALSE	High	[K].GNVDISAPK.[I]	1xTMT6plex [N-Term]		FALSE	0.0570579	0.00663642	1	1	2	Q09666	Q09666 [1083-1091]	0	1129.64	0	1.557	1.005	1.799	1.027					152.5	67.4	97.9	65.7	118.1	98.4								Not Found	Not Found	Not Found	Not Found	Not Found	Not Found	Not Found	Not Found	Not Found	Not Found	High	Not Found
	FALSE	High	[K].MPEMNIK.[AV]	1xOxidation [M4]		FALSE	0.0608206	0.00704404	1	5	2	Q09666	Q09666 [808-814]; [936-942]; [2569-2575]; [2697-2703]; [2953-2959]; [3081-3087]; [3209-3215]; [3661-3667]; [3863-3869]; [3991-3997]; [4247-4253]; [4375-4381]; [4449-4455]	0	878.411	0																					No Quan Labels	Not Found	Not Found	Not Found	Not Found	High	Not Found	Not Found	Not Found	Not Found	Not Found	Not Found	Not Found
	FALSE	High	[K].VPDVEIK.[SG]	1xTMT6plex [K7]; 1xTMT6plex [N-Term]		FALSE	0.0608206	0.00704404	1	2	8	Q09666	Q09666 [849-855]; [1226-1232]	0	1257.78	0	1.472	1.106	1.412	1.209	1	1	1	1	144.8	82.8	98.3	68.5	96.8	108.8	22.06	2.64	3.25	25.49	14.13	20.84		Not Found	Not Found	Not Found	Not Found	Medium	High	Not Found	Not Found	Not Found	Not Found	Not Found	Not Found
	FALSE	High	[K].ISMPDLDLNLK.[G]	1xPhospho [S2]; 1xOxidation [M3]; 1xTMT6plex [K11]; 1xTMT6plex [N-Term]	Q09666 1xPhospho [S2708]; 1xPhospho [S5798]; 1xPhospho [S9016]; 1xPhospho [S12558]; 1xPhospho [S16302]; 1xPhospho [S20174]; 1xPhospho [S24894]	FALSE	0.0668814	0.00770627	1	2	4	Q09666	Q09666 [2707-2717]; [3091-3101]; [3219-3229]; [3543-3553]; [3745-3755]; [3873-3883]; [4721-4731]	0	1812.96	0	0.314	0.332	0.19	0.158					83.6	19	266.3	119.9	22.8	88.4								Not Found	Not Found	High	Not Found	Not Found	Not Found	Not Found	Not Found	Not Found	Not Found	Not Found	Not Found
	FALSE	High	[K].MPFLSISSPK.[V]	1xPhospho [S8]; 1xOxidation [M1]	Q09666 1xPhospho [S3412]	FALSE	0.0668814	0.00770627	1	1	3	Q09666	Q09666 [3405-3414]	0	1202.55	0																					No Quan Labels	Not Found	Not Found	Not Found	Not Found	Not Found	Not Found	Not Found	Not Found	High	Not Found	Not Found	Not Found
	FALSE	High	[K].ISMPGFK.[G]	1xTMT6plex [K7]; 1xTMT6plex [N-Term]		FALSE	0.0679421	0.00775877	1	1	2	Q09666	Q09666 [2774-2780]; [3158-3164]; [3940-3946]	0	1237.74	0	1.516	0.63	2.714	2.326					140.7	118.6	92.8	51	138.4	58.4								Not Found	Not Found	Not Found	Not Found	Not Found	Not Found	Not Found	Not Found	High	Not Found	Not Found	Not Found
	FALSE	High	[K].MPEMNIK.[AV]	1xOxidation [M]; 1xTMT6plex [N-Term]		FALSE	0.0717727	0.00807446	1	5	3	Q09666	Q09666 [808-814]; [936-942]; [2569-2575]; [2697-2703]; [2953-2959]; [3081-3087]; [3209-3215]; [3661-3667]; [3863-3869]; [3991-3997]; [4247-4253]; [4375-4381]; [4449-4455]	0	1107.57	0	1.386	1.115	1.572	0.757	1	1	1	1	143.7	53.9	103.7	71.2	111.9	115.6	5.64	22.13	4.69	1.29	5.25	3.51		Not Found	Not Found	Not Found	Not Found	Not Found	Not Found	Not Found	Not Found	Not Found	Not Found	High	High
	FALSE	High	[K].GDMDVSLPK.[V]	1xTMT6plex [N-Term]		FALSE	0.0717727	0.00807446	1	1	2	Q09666	Q09666 [3107-3115]; [3889-3897]	0	1190.63	0	1.056	0.766	1.689	1.185					120.4	85.1	114	71.8	121.3	87.3								Not Found	Not Found	Not Found	Not Found	Not Found	Not Found	Not Found	Not Found	Not Found	Not Found	High	Not Found
	FALSE	High	[K].MSLPDVDLDLK.[G]	1xPhospho [S2]; 1xOxidation [M1]; 1xTMT6plex [K11]; 1xTMT6plex [N-Term]	Q09666 1xPhospho [S1068]	FALSE	0.0734719	0.00821562	1	2	1	Q09666	Q09666 [1067-1077]	0	1799.93	0	0.465	0.417	0.249	0.19					117.7	16.3	253.3	85.7	21.4	105.6								Not Found	Not Found	Not Found	Not Found	Not Found	Not Found	Not Found	Not Found	Not Found	Not Found	Not Found	High
	FALSE	High	[R].LSSSSSNDSGNK.[V]	1xPhospho [S]; 1xTMT6plex [N-Term]	Q09666 1xPhospho [S]	FALSE	0.0781776	0.00861869	1	1	3	Q09666	Q09666 [5862-5873]	0	1491.65	0	0.264	0.253	0.492	0.136					90.6	6.6	343.7	48.5	23.9	86.8								Not Found	Not Found	Not Found	Not Found	Not Found	Not Found	Not Found	Not Found	High	Not Found	Not Found	Not Found
	FALSE	High	[K].SPQISMSDIDLNLK.[G]	1xPhospho [S]; 1xTMT6plex [K14]; 1xTMT6plex [N-Term]	Q09666 1xPhospho [S]	FALSE	0.0825101	0.00900966	1	3	2	Q09666	Q09666 [4516-4529]	0	2099.09	0	0.335	0.22	0.326	0.43					73.3	63.6	218.9	147.7	48.2	48.2								Not Found	Not Found	High	Not Found	Not Found	Not Found	Not Found	Not Found	Not Found	Not Found	Not Found	Not Found
	FALSE	High	[K].IGFSGPK.[L]	1xTMT6plex [K7]; 1xTMT6plex [N-Term]		FALSE	0.0897329	0.00959293	1	2	2	Q09666	Q09666 [4930-4936]	0	1163.72	0	1.496	0.972	1.749	1.02					150.6	67.9	100.7	66.5	116.4	97.9								Not Found	Not Found	Not Found	Not Found	High	Not Found	Not Found	Not Found	Not Found	Not Found	Not Found	Not Found
	FALSE	High	[R].SPEPGQTWTR.[E]	1xTMT6plex [N-Term]		FALSE	0.0924825	0.00979374	1	8	2	Q09666	Q09666 [93-102]	0	1387.72	0	1.383	1.346	1.432	1.093					137.4	71.2	99.3	65.2	93.3	133.7								Not Found	Not Found	Not Found	Not Found	Not Found	Not Found	Not Found	Not Found	Not Found	Not Found	High	Not Found
	FALSE	Medium	[K].GDMDISVPK.[L]	1xOxidation [M3]; 1xTMT6plex [K9]; 1xTMT6plex [N-Term]		FALSE	0.0960087	0.0102137	1	3	2	Q09666	Q09666 [4535-4543]	0	1435.79	0	1.259	1.028	1.221	0.702					142.6	54.7	113.2	77.9	95.2	116.4								Not Found	Not Found	Not Found	Not Found	Not Found	Not Found	Not Found	Not Found	Not Found	Not Found	Not Found	High
	FALSE	Medium	[K].VSMPDVELNLK.[S]	1xOxidation [M3]; 1xTMT6plex [K11]; 1xTMT6plex [N-Term]		FALSE	0.102595	0.0107747	1	1	2	Q09666	Q09666 [3415-3425]	0	1718.98	0																					No Quan Values	Not Found	Not Found	Not Found	Not Found	Not Found	High	Not Found	Not Found	Not Found	Not Found	Not Found	Not Found
	FALSE	Medium	[K].GPQVALK.[G]	1xTMT6plex [N-Term]		FALSE	0.104855	0.0110433	1	2	2	Q09666	Q09666 [531-537]	0	941.598	0	1.558	1.04	2.215	1.037					162.6	54.7	104.4	52.8	116.9	108.5								Not Found	High	Not Found	Not Found	Not Found	Not Found	Not Found	Not Found	Not Found	Not Found	Not Found	Not Found
	FALSE	Medium	[K].IGIPGVK.[M]	1xTMT6plex [K7]; 1xTMT6plex [N-Term]		FALSE	0.105615	0.0111417	1	2	2	Q09666	Q09666 [5241-5247]	0	1141.77	0	1.906	0.989	2.16	1.433					161.7	84.1	84.8	58.7	126.8	83.9								Not Found	Not Found	Not Found	Not Found	Not Found	Not Found	High	Not Found	Not Found	Not Found	Not Found	Not Found
	FALSE	Medium	[K].MPEINIK.[A]	1xTMT6plex [K7]; 1xTMT6plex [N-Term]		FALSE	0.108688	0.0115053	1	2	2	Q09666	Q09666 [4839-4845]	0	1302.79	0	1.472	0.872	1.745	1.435					146.1	92.1	99.2	64.2	111.9	86.5								High	Not Found	Not Found	Not Found	Not Found	Not Found	Not Found	Not Found	Not Found	Not Found	Not Found	Not Found
	FALSE	Medium	[K].IPEMHLK.[A]	1xTMT6plex [K7]; 1xTMT6plex [N-Term]		FALSE	0.121504	0.0130378	1	1	2	Q09666	Q09666 [3735-3741]	0	1325.8	0	1.319	0.849	1.712	1.471					143.5	89.8	108.8	61	104.5	92.4								Not Found	High	Not Found	Not Found	Not Found	Not Found	Not Found	Not Found	Not Found	Not Found	Not Found	Not Found
	FALSE	Medium	[K].FSVPGFK.[A]	1xTMT6plex [N-Term]		FALSE	0.122335	0.0132037	1	2	2	Q09666	Q09666 [757-763]	0	1010.59	0	1.347	1.278	2.254	1.085					135	59.2	100.2	54.5	122.9	128.1								Not Found	Not Found	Not Found	High	Not Found	Not Found	Not Found	Not Found	Not Found	Not Found	Not Found	Not Found
	FALSE	Medium	[K].FSMPGFK.[GA]	1xTMT6plex [N-Term]		FALSE	0.123169	0.013283	1	5	2	Q09666	Q09666 [885-891]; [1262-1268]; [1390-1396]; [1518-1524]; [1720-1726]; [2056-2062]; [2251-2257]; [2518-2524]; [2646-2652]; [2902-2908]; [3030-3036]; [3610-3616]; [3812-3818]; [4068-4074]; [4196-4202]; [4324-4330]; [4660-4666]; [4788-4794]	0	1042.56	0	0.936	0.433	3.933	2.395					113.9	101.9	121.7	42.5	167.2	52.7								Not Found	Not Found	Not Found	Not Found	High	Not Found	Not Found	Not Found	Not Found	Not Found	Not Found	Not Found
	FALSE	Medium	[K].GDVDVTGPK.[V]	1xTMT6plex [N-Term]		FALSE	0.126544	0.0136455	1	1	1	Q09666	Q09666 [2851-2859]	0	1116.61	0																					No Quan Values	Not Found	Not Found	Not Found	Not Found	Not Found	Not Found	Not Found	High	Not Found	Not Found	Not Found	Not Found
	FALSE	Medium	[R].LGSPSGK.[T]	1xPhospho [S3]; 1xTMT6plex [K7]; 1xTMT6plex [N-Term]	Q09666 1xPhospho [S559]	FALSE	0.132602	0.0142506	1	2	2	Q09666	Q09666 [557-563]	0	1183.65	0	0.316	0.401	0.383	0.157	1	1	1	1	78.2	17.8	247.5	113.7	43.5	99.2	6.67	16.87	3.2	13.61	13.91	0.66		Not Found	Not Found	High	Medium	Not Found	Not Found	Not Found	Not Found	Not Found	Not Found	Not Found	Not Found
	FALSE	Medium	[K].GPEVDIK.[G]	1xTMT6plex [N-Term]; 1xTMT6plex [K7]		FALSE	0.132602	0.0142506	1	4	8	Q09666	Q09666 [2610-2616]; [2738-2744]; [2866-2872]; [3574-3580]; [3702-3708]; [3776-3782]; [4160-4166]; [4288-4294]; [4880-4886]	0	986.572	0	1.732	1.051	2.019	1.17	1	1	1	1	164.6	67.2	95	57.4	115.9	99.9	6.15	3.14	4.35	6.04	1.53	6.91		Not Found	Not Found	Not Found	Not Found	Not Found	Not Found	Not Found	High	High	Not Found	Not Found	Not Found
	FALSE	Medium	[K].GDFDVSVPK.[V]	1xTMT6plex [N-Term]		FALSE	0.144425	0.0155659	1	2	2	Q09666	Q09666 [4865-4873]	0	1192.64	0	1.549	0.895	1.729	0.951					159.3	63.5	102.8	66.8	115.5	92								Not Found	Not Found	Not Found	Not Found	Not Found	Not Found	Not Found	Not Found	Not Found	Not Found	Not Found	High
	FALSE	Medium	[K].LPTGQISGPEIK.[G]	1xTMT6plex [N-Term]		FALSE	0.150166	0.016372	1	2	2	Q09666	Q09666 [5513-5524]	0	1468.86	0	1.099	0.844	1.468	0.684					129.9	54.7	118.2	80	117.5	99.7								Not Found	Not Found	Not Found	Not Found	Not Found	Not Found	Not Found	High	Not Found	Not Found	Not Found	Not Found
	FALSE	Medium	[K].FSMPGFK.[GA]	1xOxidation [M3]		FALSE	0.151142	0.0164536	1	5	3	Q09666	Q09666 [885-891]; [1262-1268]; [1390-1396]; [1518-1524]; [1720-1726]; [2056-2062]; [2251-2257]; [2518-2524]; [2646-2652]; [2902-2908]; [3030-3036]; [3610-3616]; [3812-3818]; [4068-4074]; [4196-4202]; [4324-4330]; [4660-4666]; [4788-4794]	0	829.391	0																					No Quan Labels	Not Found	Not Found	Medium	Not Found	Not Found	Not Found	Not Found	Not Found	Not Found	Not Found	Not Found	Not Found
	FALSE	Medium	[K].FSVSGLK.[A]	1xTMT6plex [N-Term]		FALSE	0.151142	0.0164536	1	1	2	Q09666	Q09666 [3482-3488]	0	966.582	0	0.94	0.742	0.972	0.579					122.8	56.6	130.7	97.8	95.1	97								Not Found	Not Found	Not Found	Not Found	Not Found	Not Found	Not Found	Not Found	Not Found	Not Found	High	Not Found
	FALSE	Medium	[K].MPSLEISAPK.[V]	1xTMT6plex [N-Term]		FALSE	0.157124	0.0170524	1	2	2	Q09666	Q09666 [4906-4915]	0	1301.73	0	1.408	0.762	3.546	2.194					132.2	98.5	93.9	44.9	159.1	71.5								Not Found	Not Found	Not Found	Not Found	Not Found	Not Found	Not Found	Not Found	Not Found	High	Not Found	Not Found
	FALSE	Medium	[K].LEVPDMNIR.[G]	1xOxidation [M6]; 1xTMT6plex [N-Term]		FALSE	0.159168	0.0172532	1	2	2	Q09666	Q09666 [2482-2490]	0	1331.72	0	1.477	1.084	1.277	0.578					164.5	41.2	111.4	71.2	90.9	120.8								High	Not Found	Not Found	Not Found	Not Found	Not Found	Not Found	Not Found	Not Found	Not Found	Not Found	Not Found
	FALSE	Medium	[K].ADLGVSGPK.[V]	1xTMT6plex [N-Term]		FALSE	0.162283	0.0176288	1	1	2	Q09666	Q09666 [1537-1545]	0	1072.62	0	0.933	1.236	0.579	0.432					89.3	63.6	95.8	147.5	85.4	118.4								High	Not Found	Not Found	Not Found	Not Found	Not Found	Not Found	Not Found	Not Found	Not Found	Not Found	Not Found
	FALSE	Medium	[K].GPGVDVNLK.[G]	1xTMT6plex [N-Term]		FALSE	0.176539	0.0194304	1	2	2	Q09666	Q09666 [5435-5443]	0	1127.66	0	1.637	1.034	1.96	0.956					168.2	54.4	102.7	56.9	111.6	106.2								Not Found	Not Found	Not Found	Not Found	Not Found	Not Found	Not Found	Not Found	Not Found	Not Found	Not Found	High
	FALSE	Medium	[K].MPFLSISSPK.[V]	1xPhospho [S]; 1xTMT6plex [N-Term]		FALSE	0.187199	0.020828	1	1	5	Q09666	Q09666 [3405-3414]	0	1415.72	0	0.239	0.137	0.823	0.498	1	1	1	1	61.3	53	256.8	106.4	87.5	35.1	27.74	27.35	11.05	8.18	1.56	10.48		Not Found	Not Found	Not Found	Medium	Medium	Not Found	Not Found	Not Found	Not Found	Not Found	Not Found	Not Found
	FALSE	Medium	[K].APSLDIK.[G]	1xTMT6plex [K7]; 1xTMT6plex [N-Term]		FALSE	0.195984	0.0220267	1	1	3	Q09666	Q09666 [3324-3330]	0	1201.76	0	1.835	1.162	1.87	1.329	1	1	1	1	166.3	75.2	90.6	56.6	105.9	105.4	11.16	22.1	8.51	6.11	2.76	8.5		Not Found	Not Found	Not Found	Not Found	Not Found	Not Found	Not Found	Medium	Medium	Not Found	Not Found	Not Found
	FALSE	Medium	[K].FGFGAK.[S]	1xTMT6plex [N-Term]		FALSE	0.202542	0.0228101	1	2	1	Q09666	Q09666 [4980-4985]	0	855.493	0	1.438	0.995	2.067	0.892					156.9	50.8	109.1	56.9	117.7	108.6								Not Found	Medium	Not Found	Not Found	Not Found	Not Found	Not Found	Not Found	Not Found	Not Found	Not Found	Not Found
	FALSE	Medium	[K].IDVTAPDVSIEEPEGK.[L]			FALSE	0.203884	0.0229599	1	2	1	Q09666	Q09666 [785-800]	0	1698.84	0																					No Quan Labels	Not Found	Not Found	Not Found	Not Found	Not Found	Not Found	Not Found	Not Found	Not Found	Not Found	Not Found	Not Found
	FALSE	Medium	[K].VPDVEIK.[SG]	1xTMT6plex [N-Term]		FALSE	0.206597	0.0232213	1	2	8	Q09666	Q09666 [849-855]; [1226-1232]	0	1028.62	0	1.546	1.075	1.878	0.945					160.3	55.5	103.7	58.7	110.3	111.5								Medium	Not Found	Not Found	Not Found	Not Found	Not Found	Not Found	Not Found	Not Found	Not Found	Not Found	Not Found
	FALSE	Medium	[K].SSGCDVNLPGVNVK.[L]	1xCarbamidomethyl [C4]; 1xPhospho [S2]; 1xTMT6plex [K14]		FALSE	0.217874	0.0246938	1	2	1	Q09666	Q09666 [5499-5512]	0	1754.83	0	0.565	0.66	0.888	2.079					47.6	216.4	84.1	104	92.4	55.5								Not Found	Not Found	Not Found	Not Found	Not Found	Not Found	Not Found	Not Found	Not Found	Medium	Not Found	Not Found
	FALSE	Medium	[K].FGFGAK.[S]	1xTMT6plex [K6]; 1xTMT6plex [N-Term]		FALSE	0.223778	0.0253745	1	2	1	Q09666	Q09666 [4980-4985]	0	1084.66	0	1.659	0.899	1.931	1.166					168.1	68.1	101.4	58.4	112.8	91.1								Not Found	Not Found	Not Found	Not Found	Not Found	Not Found	Not Found	Not Found	Not Found	Medium	Not Found	Not Found
	FALSE	Medium	[K].VSVGAPDLSLEASEGSIK.[L]			FALSE	0.25103	0.0285724	1	2	1	Q09666	Q09666 [5385-5402]	0	1758.91	0																					No Quan Labels	Not Found	Not Found	Not Found	Not Found	Not Found	Not Found	Not Found	Medium	Not Found	Not Found	Not Found	Not Found
	FALSE	Medium	[K].MPDLHLK.[A]	1xTMT6plex [K7]; 1xTMT6plex [N-Term]		FALSE	0.252743	0.0287683	1	3	2	Q09666	Q09666 [4119-4125]; [4583-4589]	0	1311.79	0	1.245	0.596	1.753	1.468					144.8	93.8	116.3	63.9	112	69.3								Not Found	Not Found	Medium	Not Found	Not Found	Not Found	Not Found	Not Found	Not Found	Not Found	Not Found	Not Found
	FALSE	Medium	[K].LEGDLK.[GDLMA]	1xTMT6plex [K6]; 1xTMT6plex [N-Term]		FALSE	0.254468	0.0289807	7	28	12	A7E2Y1; P13535; Q09666; P12882; P12883; Q9UKX2; Q9Y623	A7E2Y1 [1104-1109]; P13535 [1058-1063]; Q09666 [971-976]; [2411-2416]; [3318-3323]; [3568-3573]; [4544-4549]; [5155-5160]; P12882 [1059-1064]; P12883 [1055-1060]; Q9UKX2 [1061-1066]; Q9Y623 [1059-1064]	0	1132.7	0	1.331	2.506	0.71	0.851	1	1	1	1	118.4	56.4	89	66.3	47.1	222.9	15.65	26.98	10.11	14.1	37.69	36.29	Shared	Not Found	Medium	Medium	Medium	Not Found	Not Found	Not Found	Not Found	Not Found	Not Found	Not Found	Not Found
	FALSE	Medium	[K].FSMPGFK.[GA]			FALSE	0.259712	0.029676	1	5	4	Q09666	Q09666 [885-891]; [1262-1268]; [1390-1396]; [1518-1524]; [1720-1726]; [2056-2062]; [2251-2257]; [2518-2524]; [2646-2652]; [2902-2908]; [3030-3036]; [3610-3616]; [3812-3818]; [4068-4074]; [4196-4202]; [4324-4330]; [4660-4666]; [4788-4794]	0	813.396	0																					No Quan Labels	Not Found	Not Found	Not Found	Not Found	Not Found	Not Found	Not Found	Not Found	Not Found	Not Found	Not Found	Not Found
	FALSE	Medium	[K].AEAPLPSPK.[L]	1xPhospho [S7]; 1xTMT6plex [N-Term]		FALSE	0.276057	0.0317894	1	2	1	Q09666	Q09666 [5104-5112]	0	1218.63	0	0.372	0.455	0.701	0.491					56.8	71.9	152.7	146.4	102.7	69.4								Not Found	Not Found	Not Found	Not Found	Not Found	Not Found	Not Found	Medium	Not Found	Not Found	Not Found	Not Found
	FALSE	Medium	[K].APSLDIK.[G]	1xPhospho [S3]; 1xTMT6plex [K7]; 1xTMT6plex [N-Term]		FALSE	0.279809	0.0321685	1	1	2	Q09666	Q09666 [3324-3330]	0	1281.72	0	0.336	0.284	0.433	0.283					89.9	27.5	267.3	97.3	42.1	75.8								Not Found	Medium	Not Found	Not Found	Not Found	Not Found	Not Found	Not Found	Not Found	Not Found	Not Found	Not Found
	FALSE	Medium	[K].FTFSGR.[E]	1xTMT6plex [N-Term]		FALSE	0.281701	0.0323628	1	2	1	Q09666	Q09666 [5666-5671]	0	943.52	0	1.567	1.013	1.901	1.32					158.3	74.6	101	56.5	107.3	102.3								Medium	Not Found	Not Found	Not Found	Not Found	Not Found	Not Found	Not Found	Not Found	Not Found	Not Found	Not Found
	FALSE	Medium	[K].FGTFGGLGSK.[S]	1xPhospho [T3]		FALSE	0.299188	0.0346035	1	1	2	Q09666	Q09666 [5822-5831]	0	1050.47	0																					No Quan Labels	Not Found	Not Found	Not Found	Not Found	Not Found	Not Found	Not Found	Not Found	Not Found	Medium	Not Found	Not Found
	FALSE	Medium	[K].APDVDIK.[G]	1xTMT6plex [K7]; 1xTMT6plex [N-Term]		FALSE	0.313338	0.036225	1	1	2	Q09666	Q09666 [1482-1488]	0	1215.73	0	1.522	1.291	1.025	1.031					139.5	84.5	91.7	82	84	118.3								Medium	Not Found	Not Found	Not Found	Not Found	Not Found	Not Found	Not Found	Not Found	Not Found	Not Found	Not Found
	FALSE	Medium	[QK].VPDVDIR.[G]	1xTMT6plex [N-Term]		FALSE	0.325822	0.037867	1	2	1	Q09666	Q09666 [1098-1104]; [2215-2221]	0	1042.61	0	1.572	0.966	1.524	0.935					159.7	65.1	101.5	69.6	106	98.1								Medium	Not Found	Not Found	Not Found	Not Found	Not Found	Not Found	Not Found	Not Found	Not Found	Not Found	Not Found
	FALSE	Medium	[K].IHMSGPK.[I]	1xPhospho [S4]; 1xOxidation [M3]; 1xTMT6plex [K7]; 1xTMT6plex [N-Term]		FALSE	0.362979	0.0426879	1	2	1	Q09666	Q09666 [5028-5034]	0	1323.69	0	0.478	0.51	0.626	0.475					86.1	54.7	180.1	115.2	72.1	91.8								Not Found	Medium	Not Found	Not Found	Not Found	Not Found	Not Found	Not Found	Not Found	Not Found	Not Found	Not Found
	FALSE	Medium	[K].GDMDVSVPK.[V]	1xTMT6plex [N-Term]		FALSE	0.369819	0.0436587	1	2	2	Q09666	Q09666 [1669-1677]; [2005-2013]; [2200-2208]	0	1176.61	0	1.587	0.751	2.446	1.619					159.4	84.6	100.4	52.3	127.8	75.4								Not Found	Not Found	Not Found	Not Found	Not Found	Not Found	Not Found	Not Found	Medium	Not Found	Not Found	Not Found
	FALSE	Medium	[K].GGQIGLQAPGLSVSGPQGHLESGSGK.[V]	1xTMT6plex [K26]; 1xTMT6plex [N-Term]		FALSE	0.369819	0.0436587	1	2	1	Q09666	Q09666 [5630-5655]	0	2876.56	0	0.555	0.549	1.084	1.799					49.1	191.8	88.4	106.6	115.6	48.5								Not Found	Not Found	Not Found	Not Found	Not Found	Medium	Not Found	Not Found	Not Found	Not Found	Not Found	Not Found
	FALSE	Medium	[K].GDLDASVPSMK.[V]	1xTMT6plex [N-Term]		FALSE	0.388485	0.0457336	1	2	1	Q09666	Q09666 [5313-5323]	0	1348.7	0	1.342	1.222	1.184	1.219					118.4	102.2	88.3	83.9	99.3	107.9								Not Found	Not Found	Not Found	Not Found	Not Found	Not Found	Not Found	Not Found	Not Found	Medium	Not Found	Not Found
	FALSE	Medium	[K].ISMPDVGLNLK.[A]			FALSE	0.393248	0.0463566	1	1	1	Q09666	Q09666 [1579-1589]	0	1186.65	0																					No Quan Labels	Not Found	Not Found	Not Found	Not Found	Not Found	Not Found	Not Found	Not Found	Not Found	Not Found	Not Found	Not Found
FALSE	High	Master Protein	A0A024R1N1	Myosin, heavy polypeptide 9, non-muscle, isoform CRA_a OS=Homo sapiens OX=9606 GN=MYH9 PE=3 SV=1	0	FALSE	1278.28	62	136	1301	114	1	1960	226.4	5.6	9235	1863.47	121	133	cell differentiation;cell organization and biogenesis;cellular component movement;metabolic process;regulation of biological process;response to stimulus;transport	cytoplasm;cytoskeleton;cytosol;extracellular;membrane;nucleus	catalytic activity;motor activity;nucleotide binding;protein binding;RNA binding;transporter activity	Pf00063, Pf01442, Pf01496, Pf01576, Pf01765, Pf02736, Pf03962, Pf04111, Pf04156, Pf05911, Pf06637, Pf07888, Pf09731, Pf11068, Pf11559, Pf12128, Pf13094	4627	MYH9	22	VEGFA-VEGFR2 Signaling Pathway; Primary Focal Segmental Glomerulosclerosis FSGS	ENSG00000100345.20	Tight junction; Salmonella infection; Regulation of actin cytoskeleton	34	1.277	1.161	1.245	1.36	1	1	1	1	102.2	122.5	80.1	90.1	112.2	92.9	10.17	25.31	15.4	23.26	16.25
	Checked	Confidence	Annotated Sequence	Modifications	Modifications in Master Proteins	Contaminant	Qvality PEP	Qvality q-value	# Protein Groups	# Proteins	# PSMs	Master Protein Accessions	Positions in Master Proteins	# Missed Cleavages	Theo. MH+ [Da]	# Razor Quan Results	Abundance Ratio: (126) / (128)	Abundance Ratio: (131) / (128)	Abundance Ratio: (130) / (129)	Abundance Ratio: (127) / (129)	Abundance Ratio Adj. P-Value: (126) / (128)	Abundance Ratio Adj. P-Value: (131) / (128)	Abundance Ratio Adj. P-Value: (130) / (129)	Abundance Ratio Adj. P-Value: (127) / (129)	Abundances (Grouped): 126	Abundances (Grouped): 127	Abundances (Grouped): 128	Abundances (Grouped): 129	Abundances (Grouped): 130	Abundances (Grouped): 131	Abundances (Grouped) CV [%]: 126	Abundances (Grouped) CV [%]: 127	Abundances (Grouped) CV [%]: 128	Abundances (Grouped) CV [%]: 129	Abundances (Grouped) CV [%]: 130	Abundances (Grouped) CV [%]: 131	Quan Info	Found in Sample: [S1] F1: 126, Sample	Found in Sample: [S2] F2: 126, Sample	Found in Sample: [S3] F3: 126, Sample	Found in Sample: [S4] F4: 126, Sample	Found in Sample: [S5] F5: 126, Sample	Found in Sample: [S6] F6: 126, Sample	Found in Sample: [S7] F7: 126, Sample	Found in Sample: [S8] F8: 126, Sample	Found in Sample: [S9] F9: 126, Sample	Found in Sample: [S10] F10: 126, Sample	Found in Sample: [S11] F11: 126, Sample	Found in Sample: [S12] F12: 126, Sample
	FALSE	High	[R].IAQLEEELEEEQGNTELINDR.[L]	1xTMT6plex [N-Term]		FALSE	4.26126e-06	0	1	3	2	A0A024R1N1	A0A024R1N1 [1731-1751]	0	2701.34	0	0.324	0.175	0.746	1.829					33.7	227.2	104.1	124.2	92.6	18.2								Not Found	Not Found	Not Found	Not Found	Not Found	Not Found	Not Found	High	Not Found	Not Found	Not Found	Not Found
	FALSE	High	[R].IAQLEEELEEEQGNTELINDR.[L]			FALSE	1.97186e-06	0	1	3	12	A0A024R1N1	A0A024R1N1 [1731-1751]	0	2472.17	0																					No Quan Labels	Not Found	Not Found	Not Found	Not Found	Not Found	High	Not Found	Not Found	Not Found	Not Found	Not Found	Not Found
	FALSE	High	[K].IAQLEEQLDNETK.[E]	1xTMT6plex [K13]; 1xTMT6plex [N-Term]		FALSE	2.75656e-06	0	1	3	4	A0A024R1N1	A0A024R1N1 [1816-1828]	0	1989.09	0	1.571	1.035	1.49	1.525					111.2	131	70.8	85.9	127.9	73.3								High	Not Found	Not Found	Not Found	Not Found	Not Found	Not Found	Not Found	Not Found	Not Found	Not Found	Not Found
	FALSE	High	[K].IAQLEEQLDNETK.[E]	1xTMT6plex [N-Term]		FALSE	1.47474e-05	0	1	3	4	A0A024R1N1	A0A024R1N1 [1816-1828]	0	1759.93	0	0.905	0.765	1.228	0.991	1	1	1	1	86.7	106	95.7	106.9	131.4	73.3	35.74	35.73	5.49	5.43	26.01	53.59		Not Found	Not Found	Not Found	Not Found	Not Found	Not Found	Not Found	Not Found	Not Found	Not Found	High	High
	FALSE	High	[K].IAQLEEQLDNETK.[E]			FALSE	1.52287e-05	0	1	3	4	A0A024R1N1	A0A024R1N1 [1816-1828]	0	1530.76	0																					No Quan Labels	Not Found	Not Found	Not Found	Not Found	Not Found	Not Found	Not Found	Not Found	Not Found	Not Found	Not Found	Not Found
	FALSE	High	[K-].MQQNIQELEEQLEEEESAR.[Q]			FALSE	3.57976e-05	0	1	4	4	A0A024R1N1	A0A024R1N1 [941-959]	0	2333.06	0																					No Quan Labels	Not Found	Not Found	Not Found	Not Found	Not Found	Not Found	Not Found	Not Found	Not Found	Not Found	Not Found	Not Found
	FALSE	High	[R].DELADEIANSSGK.[G]	1xTMT6plex [K13]; 1xTMT6plex [N-Term]		FALSE	1.11577e-05	0	1	3	4	A0A024R1N1	A0A024R1N1 [1704-1716]	0	1806.95	0	0.698	0.576	0.714	2.235					51.8	244.1	74.2	109.2	78	42.7								Not Found	Not Found	Not Found	Not Found	Not Found	Not Found	Not Found	Not Found	Not Found	High	Not Found	Not Found
	FALSE	High	[R].IAEFTTNLTEEEEK.[S]	1xTMT6plex [K14]; 1xTMT6plex [N-Term]		FALSE	3.13811e-06	0	1	4	2	A0A024R1N1	A0A024R1N1 [1001-1014]	0	2112.11	0	2.579	1.042	3.428	2.134					162.1	100.7	62.9	47.2	161.7	65.5								Not Found	Not Found	High	Not Found	Not Found	Not Found	Not Found	Not Found	Not Found	Not Found	Not Found	Not Found
	FALSE	High	[R].IAEFTTNLTEEEEK.[S]	1xTMT6plex [N-Term]		FALSE	1.88164e-06	0	1	4	5	A0A024R1N1	A0A024R1N1 [1001-1014]	0	1882.95	0	1.061	0.778	1.9	1.09	1	1	1	1	102.6	88.9	96.7	81.5	154.9	75.3	9.21	18.1	2.96	16.71	8.98	12.45		Not Found	High	High	Not Found	Not Found	Not Found	Not Found	Not Found	Not Found	Not Found	Not Found	Not Found
	FALSE	High	[K-].MQQNIQELEEQLEEEESAR.[Q]	1xOxidation [M1]		FALSE	1.28291e-05	0	1	4	6	A0A024R1N1	A0A024R1N1 [941-959]	0	2349.05	0																					No Quan Labels	High	High	Not Found	Not Found	Not Found	Not Found	Not Found	Not Found	Not Found	Not Found	Not Found	Not Found
	FALSE	High	[K-].MQQNIQELEEQLEEEESAR.[Q]	1xTMT6plex [N-Term]		FALSE	4.1114e-05	0	1	4	2	A0A024R1N1	A0A024R1N1 [941-959]	0	2562.22	0	0.687	0.76	0.761	0.583					70.1	87.1	102	149.4	113.7	77.6								Not Found	Not Found	Not Found	Not Found	Not Found	Not Found	Not Found	High	Not Found	Not Found	Not Found	Not Found
	FALSE	High	[K-].MQQNIQELEEQLEEEESAR.[Q]	1xOxidation [M1]; 1xTMT6plex [N-Term]		FALSE	4.27951e-08	0	1	4	4	A0A024R1N1	A0A024R1N1 [941-959]	0	2578.21	1	0.394	0.267	0.623	0.654	1	1	1	1	68.8	89	174.9	136	84.7	46.7	74.03	65.62	89.12	60.65	76.85	104.25		Not Found	Not Found	Not Found	Not Found	Not Found	Not Found	High	High	Not Found	Not Found	Not Found	Not Found
	FALSE	High	[R].ELEDATETADAMNR.[E]			FALSE	2.78651e-06	0	1	3	4	A0A024R1N1	A0A024R1N1 [1899-1912]	0	1565.67	0																					No Quan Labels	Not Found	Not Found	Not Found	Not Found	Not Found	Not Found	Not Found	Not Found	Not Found	Not Found	Not Found	Not Found
	FALSE	High	[R].ELEDATETADAMNR.[E]	1xOxidation [M12]		FALSE	4.52628e-05	0	1	3	4	A0A024R1N1	A0A024R1N1 [1899-1912]	0	1581.67	0																					No Quan Labels	Not Found	Not Found	Not Found	High	Not Found	Not Found	Not Found	Not Found	Not Found	Not Found	Not Found	Not Found
	FALSE	High	[R].ELEDATETADAMNR.[E]	1xOxidation [M12]; 1xTMT6plex [N-Term]		FALSE	4.26126e-06	0	1	3	6	A0A024R1N1	A0A024R1N1 [1899-1912]	0	1810.83	0	0.839	0.804	1.043	1.675	1	1	1	1	70	170.9	83.5	102.1	106.4	67.1	1.72	25.29	13.99	15.9	1.86	18.76		Not Found	Not Found	Not Found	Not Found	Not Found	High	High	Not Found	Not Found	Not Found	Not Found	Not Found
	FALSE	High	[R].ELEDATETADAMNR.[E]	1xTMT6plex [N-Term]		FALSE	7.1768e-06	0	1	3	4	A0A024R1N1	A0A024R1N1 [1899-1912]	0	1794.84	0	0.723	0.635	1.36	2.682					53.3	226.6	73.8	84.5	114.9	46.9								Not Found	Not Found	Not Found	Not Found	Not Found	Not Found	High	Not Found	Not Found	Not Found	Not Found	Not Found
	FALSE	High	[K].VEAQLQELQVK.[F]	1xTMT6plex [K11]; 1xTMT6plex [N-Term]		FALSE	1.37799e-05	0	1	3	8	A0A024R1N1	A0A024R1N1 [1250-1260]	0	1743.04	0	1.667	1.196	2.875	2.073	1	1	1	1	108.3	121.6	65	58.7	168.6	77.8	1.44	12.35	10.31	10.46	11.53	4.42		Not Found	Not Found	Not Found	Not Found	Not Found	High	High	Not Found	Not Found	Not Found	Not Found	Not Found
	FALSE	High	[K].VEAQLQELQVK.[F]			FALSE	5.58356e-05	0	1	3	2	A0A024R1N1	A0A024R1N1 [1250-1260]	0	1284.72	0																					No Quan Labels	Not Found	Not Found	Not Found	Not Found	Not Found	Not Found	Not Found	Not Found	Not Found	Not Found	Not Found	Not Found
	FALSE	High	[K].VEDMAELTCLNEASVLHNLK.[ED]	1xCarbamidomethyl [C9]; 1xOxidation [M4]; 1xTMT6plex [K20]; 1xTMT6plex [N-Term]		FALSE	1.78264e-06	0	2	9	2	P35580; A0A024R1N1	P35580 [87-106]; A0A024R1N1 [83-102]	0	2760.43	0	1.612	0.907	1.58	1.151					148.4	85.2	92	74	116.9	83.5							Shared	Not Found	Not Found	Not Found	High	Not Found	Not Found	Not Found	Not Found	Not Found	Not Found	Not Found	Not Found
	FALSE	High	[K].MEDSVGCLETAEEVK.[R]	1xCarbamidomethyl [C7]		FALSE	8.45535e-07	0	1	2	2	A0A024R1N1	A0A024R1N1 [1373-1387]	0	1696.74	0																					No Quan Labels	Not Found	Not Found	Not Found	Not Found	Not Found	Not Found	Not Found	Not Found	Not Found	Not Found	Not Found	Not Found
	FALSE	High	[KR].KEEELQAALAR.[LAV]	1xTMT6plex [K1]; 1xTMT6plex [N-Term]		FALSE	5.67773e-05	0	1	10	12	A0A024R1N1	A0A024R1N1 [1081-1091]	1	1486.84	0	1.51	1.441	3.026	2.626	1	1	1	1	111.6	121.6	73.9	46.3	140.1	106.5	15.94	3.82	1.26	53.93	7.55	2.09		Not Found	Not Found	Not Found	Not Found	Not Found	Not Found	Not Found	Not Found	High	High	Not Found	Not Found
	FALSE	High	[R].DLGEELEALK.[T]	1xTMT6plex [K10]; 1xTMT6plex [N-Term]		FALSE	5.60228e-05	0	1	7	4	A0A024R1N1	A0A024R1N1 [1136-1145]	0	1574.9	0	1.81	1.558	0.493	1.461	0.814783	1	0.279201	1	120.8	152.6	66.7	104.4	51.5	104	15.9	5.39	6.78	25.22	5.09	7.64		High	Not Found	Not Found	Not Found	Not Found	Not Found	Not Found	Not Found	Not Found	Not Found	Not Found	High
	FALSE	High	[K].NMDPLNDNIATLLHQSSDK.[F]			FALSE	5.7229e-06	0	1	4	2	A0A024R1N1	A0A024R1N1 [588-606]	0	2126.02	0																					No Quan Labels	Not Found	Not Found	Not Found	Not Found	Not Found	Not Found	Not Found	Not Found	Not Found	Not Found	Not Found	Not Found
	FALSE	High	[K].NMDPLNDNIATLLHQSSDK.[F]	1xTMT6plex [N-Term]		FALSE	7.6444e-08	0	1	4	2	A0A024R1N1	A0A024R1N1 [588-606]	0	2355.18	0	0.457	0.01	3.082	7.053					26.8	325.8	58.7	46.2	142.4									Not Found	Not Found	Not Found	Not Found	Not Found	Not Found	Not Found	High	Not Found	Not Found	Not Found	Not Found
	FALSE	High	[K].NMDPLNDNIATLLHQSSDK.[F]	1xOxidation [M2]; 1xTMT6plex [N-Term]; 1xTMT6plex [K19]		FALSE	2.47424e-06	0	1	4	12	A0A024R1N1	A0A024R1N1 [588-606]	0	2371.18	0	0.744	0.498	0.957	1.367	1	1	1	1	73.1	156.2	98.2	114.3	109.4	48.9	16.01	6.97	3.98	7.98	18.42	22.1		Not Found	High	High	High	Not Found	High	High	Not Found	Not Found	Not Found	Not Found	Not Found
	FALSE	High	[K].NMDPLNDNIATLLHQSSDK.[F]	1xOxidation [M2]; 1xTMT6plex [K19]; 1xTMT6plex [N-Term]		FALSE	5.04618e-06	0	1	4	6	A0A024R1N1	A0A024R1N1 [588-606]	0	2600.34	0	0.488	0.439	0.989	1.531	1	1	1	1	57	163.1	116.8	106.5	105.4	51.2	60.66	42.17	9.73	41.59	14.03	57.97		Not Found	High	Not Found	Not Found	Not Found	High	Not Found	Not Found	Not Found	High	Not Found	Not Found
	FALSE	High	[K].NLPIYSEEIVEMYK.[G]	1xOxidation [M12]; 1xTMT6plex [K14]; 1xTMT6plex [N-Term]		FALSE	1.51204e-05	0	1	5	8	A0A024R1N1	A0A024R1N1 [126-139]	0	2202.18	0	1.63	1.001	2.179	1.992	1	1	1	1	110.2	136.6	67.6	68.6	149.4	67.6	30.02	29.85	6.1	21.03	13.95	42.37		Not Found	Not Found	Not Found	Not Found	Not Found	High	High	High	Not Found	Not Found	Not Found	Not Found
	FALSE	High	[K].NLPIYSEEIVEMYK.[G]	1xTMT6plex [N-Term]		FALSE	5.56489e-05	0	1	5	2	A0A024R1N1	A0A024R1N1 [126-139]	0	1957.02	0	0.58	0.89	0.944	1.458					72.6	124.6	125.2	85.5	80.7	111.5								Not Found	Not Found	Not Found	Not Found	Not Found	Not Found	High	Not Found	Not Found	Not Found	Not Found	Not Found
	FALSE	High	[K].NLPIYSEEIVEMYK.[G]	1xOxidation [M12]; 1xTMT6plex [N-Term]; 1xTMT6plex [K14]		FALSE	1.40784e-05	0	1	5	6	A0A024R1N1	A0A024R1N1 [126-139]	0	1973.01	0	1.33	1.012	1.123	0.641	1	1	1	1	125.9	65.8	94.7	102.6	115.2	95.9	10.48	5.31	9.9	14.71	26.02	4.62		Not Found	Not Found	Not Found	High	High	Not Found	Not Found	Not Found	Not Found	Not Found	Not Found	High
	FALSE	High	[K].HEAMITDLEER.[L]	1xTMT6plex [N-Term]		FALSE	8.99819e-06	0	1	4	4	A0A024R1N1	A0A024R1N1 [1025-1035]	0	1572.79	0	1.353	0.914	2.469	3.5	1	1	1	1	80.5	203.8	59.5	58.2	143.7	54.3	9.47	2.53	15.22	1.26	5.37	8.76		Not Found	Not Found	Not Found	Not Found	Not Found	Not Found	Not Found	High	High	Not Found	Not Found	Not Found
	FALSE	High	[K].HEAMITDLEER.[L]	1xOxidation [M4]; 1xTMT6plex [N-Term]		FALSE	2.14995e-06	0	1	4	6	A0A024R1N1	A0A024R1N1 [1025-1035]	0	1588.78	0	1.431	1.092	1.599	1.598	1	1	1	1	115.5	120.2	80.7	75.2	120.3	88.1	12.13	36.89	21.21	32.73	12.99	10.15		Not Found	Not Found	Not Found	Not Found	Not Found	Not Found	High	High	High	Not Found	Not Found	Not Found
	FALSE	High	[K].HSQAVEELAEQLEQTK.[R]	1xTMT6plex [K16]; 1xTMT6plex [N-Term]		FALSE	4.44948e-05	0	1	3	8	A0A024R1N1	A0A024R1N1 [1194-1209]	0	2298.23	0	0.907	0.541	1.339	2.711					78.2	208.7	86.3	77	103.1	46.7								Not Found	High	Not Found	Not Found	Not Found	Not Found	Not Found	Not Found	Not Found	Not Found	Not Found	Not Found
	FALSE	High	[K].HSQAVEELAEQLEQTK.[R]			FALSE	7.26267e-05	0	1	3	4	A0A024R1N1	A0A024R1N1 [1194-1209]	0	1839.91	0																					No Quan Labels	Not Found	Not Found	Not Found	Not Found	Not Found	Not Found	High	High	Not Found	Not Found	Not Found	Not Found
	FALSE	High	[R].TEMEDLMSSK.[D]	1xTMT6plex [K10]; 1xTMT6plex [N-Term]		FALSE	2.28392e-05	0	1	4	6	A0A024R1N1	A0A024R1N1 [1504-1513]	0	1628.83	0	1.271	0.847	2.125	2.418	1	1	0.308465	0.178686	90.9	164.5	71.5	68	144.6	60.5	8.66	12.33	11.5	0.97	3.1	15.39		Not Found	High	High	Not Found	Not Found	Not Found	Not Found	Not Found	Not Found	Not Found	Not Found	Not Found
	FALSE	High	[K].THEAQIQEMR.[Q]	1xOxidation [M9]; 1xTMT6plex [N-Term]		FALSE	6.87445e-05	0	1	3	4	A0A024R1N1	A0A024R1N1 [1182-1191]	0	1487.75	0	1.92	0.662	0.991	2.115	1	1	1	1	137.9	176.6	71.8	83.5	82.8	47.5	5.27	1.88	5.04	4.6	4.58	0.78		Not Found	Not Found	Not Found	Not Found	Not Found	Not Found	Not Found	High	High	Not Found	Not Found	Not Found
	FALSE	High	[K].TELEDTLDSTAAQQELR.[S]	1xTMT6plex [N-Term]		FALSE	1.12398e-06	0	1	3	7	A0A024R1N1	A0A024R1N1 [1146-1162]	0	2149.08	0	1.348	0.903	1.636	1.443	1	1	1	1	106.6	121.3	79.1	84.1	137.5	71.5	8.94	4.94	6.58	33.71	11.83	3.54		Not Found	Not Found	Not Found	Not Found	Not Found	Not Found	High	High	Not Found	Not Found	Not Found	Not Found
	FALSE	High	[K].TELEDTLDSTAAQQELR.[S]			FALSE	6.33781e-07	0	1	3	4	A0A024R1N1	A0A024R1N1 [1146-1162]	0	1919.92	0																					No Quan Labels	Not Found	Not Found	Not Found	Not Found	Not Found	High	Not Found	Not Found	Not Found	Not Found	Not Found	Not Found
	FALSE	High	[R].NTDQASMPDNTAAQK.[V]	1xOxidation [M7]; 1xTMT6plex [K15]; 1xTMT6plex [N-Term]		FALSE	5.32719e-05	0	1	7	6	A0A024R1N1	A0A024R1N1 [359-373]	0	2066.02	0	1.177	0.994	0.947	1.19	1	1	1	1	96.5	128.9	82	108.4	102.6	81.5	24.3	45.5	24.99	16.37	8.35	9.86		Not Found	Not Found	Not Found	Not Found	Not Found	Not Found	Not Found	Not Found	High	High	Not Found	Not Found
	FALSE	High	[R].NTDQASMPDNTAAQK.[V]	1xTMT6plex [K15]; 1xTMT6plex [N-Term]		FALSE	7.589e-07	0	1	7	2	A0A024R1N1	A0A024R1N1 [359-373]	0	2050.03	0	1.595	1.275	1.329	3.132					77.8	235.9	48.8	75.3	100.1	62.2								Not Found	Not Found	Not Found	Not Found	Not Found	Not Found	Not Found	Not Found	Not Found	High	Not Found	Not Found
	FALSE	High	[R].NTDQASMPDNTAAQK.[V]	1xOxidation [M7]; 1xTMT6plex [N-Term]; 1xTMT6plex [K15]		FALSE	6.98541e-07	0	1	7	4	A0A024R1N1	A0A024R1N1 [359-373]	0	1836.86	0	0.879	0.779	1.346	1.59	1	1	1	1	73.5	152.5	83.7	95.9	129.1	65.2	13.54	8.73	8.33	18.44	21.18	20.43		Not Found	Not Found	Not Found	Not Found	Not Found	High	High	Not Found	Not Found	Not Found	Not Found	Not Found
	FALSE	High	[R].NTDQASMPDNTAAQK.[V]	1xTMT6plex [N-Term]		FALSE	4.20282e-07	0	1	7	2	A0A024R1N1	A0A024R1N1 [359-373]	0	1820.86	0	1.443	1.014	1.336	1.485					124.8	117	86.5	78.8	105.3	87.7								Not Found	Not Found	Not Found	Not Found	Not Found	Not Found	Not Found	High	Not Found	Not Found	Not Found	Not Found
	FALSE	High	[R].NTDQASMPDNTAAQK.[V]			FALSE	2.20486e-06	0	1	7	6	A0A024R1N1	A0A024R1N1 [359-373]	0	1591.7	0																					No Quan Labels	Not Found	Not Found	Not Found	Not Found	Not Found	Not Found	Not Found	Not Found	Not Found	Not Found	Not Found	Not Found
	FALSE	High	[K].KQELEEICHDLEAR.[V]	1xCarbamidomethyl [C8]; 1xTMT6plex [N-Term]; 1xTMT6plex [K1]		FALSE	4.91202e-05	0	1	3	8	A0A024R1N1	A0A024R1N1 [910-923]	1	1999.01	0	1.303	0.836	2.38	2.723					92.5	168.3	71	61.8	147	59.4								Not Found	Not Found	Not Found	Not Found	Not Found	Not Found	Not Found	High	Not Found	Not Found	Not Found	Not Found
	FALSE	High	[K].KQELEEICHDLEAR.[V]	1xCarbamidomethyl [C8]		FALSE	2.41689e-05	0	1	3	4	A0A024R1N1	A0A024R1N1 [910-923]	1	1769.85	0																					No Quan Labels	Not Found	Not Found	Not Found	Not Found	Not Found	High	Not Found	Not Found	Not Found	Not Found	Not Found	Not Found
	FALSE	High	[K].DLEAHIDSANK.[N]	1xTMT6plex [K11]; 1xTMT6plex [N-Term]		FALSE	4.08315e-05	0	1	3	6	A0A024R1N1	A0A024R1N1 [1621-1631]	0	1441.75	0	0.597	0.595	0.911	2.024	1	1	1	1	53.2	208.1	89.1	102.8	93.7	53	12.92	17.49	22.33	3.55	8.56	25.94		Not Found	Not Found	Not Found	Not Found	Not Found	Not Found	Not Found	High	High	Not Found	Not Found	Not Found
	FALSE	High	[K].DVLLQVDDERR.[N]	1xTMT6plex [N-Term]		FALSE	5.27363e-05	0	1	3	4	A0A024R1N1	A0A024R1N1 [1846-1856]	1	1586.87	0	0.962	0.792	1.018	1.801	1	1	1	1	82.4	171.7	85.7	95.3	97.1	67.9	21.96	5.42	0.38	17.77	11.75	5.43		Not Found	Not Found	Not Found	Not Found	Not Found	Not Found	Not Found	Not Found	Not Found	Not Found	High	High
	FALSE	High	[K].KMEDSVGCLETAEEVK.[R]	1xCarbamidomethyl [C8]; 2xTMT6plex [K1; K16]; 1xTMT6plex [N-Term]		FALSE	4.74781e-05	0	1	2	2	A0A024R1N1	A0A024R1N1 [1372-1387]	1	2512.32	0	0.991	0.717	1.353	2.134	1	1	1	1	85.1	174.8	85.8	81.9	110.8	61.5	13.64	21.42	33.65	39.34	12.96	1.09		High	High	Not Found	Not Found	Not Found	Not Found	Not Found	Not Found	Not Found	Not Found	Not Found	Not Found
	FALSE	High	[K].KMEDSVGCLETAEEVK.[R]	1xCarbamidomethyl [C8]; 1xTMT6plex [K1]; 1xTMT6plex [N-Term]		FALSE	2.7634e-05	0	1	2	1	A0A024R1N1	A0A024R1N1 [1372-1387]	1	2283.16	0	0.934	0.841	2.557	2.716					83.5	152.3	89.4	56.1	143.5	75.2								Not Found	Not Found	Not Found	Not Found	Not Found	Not Found	Not Found	Not Found	Not Found	Not Found	Not Found	High
	FALSE	High	[K].KLEEEQIILEDQNCK.[L]	1xCarbamidomethyl [C14]; 2xTMT6plex [K1; K15]; 1xTMT6plex [N-Term]		FALSE	2.44765e-06	0	1	4	1	A0A024R1N1	A0A024R1N1 [975-989]	1	2576.42	0	1.262	0.795	1.3	2.517					98.2	189.2	77.8	75.2	97.7	61.9								High	Not Found	Not Found	Not Found	Not Found	Not Found	Not Found	Not Found	Not Found	Not Found	Not Found	Not Found
	FALSE	High	[K].KLEEEQIILEDQNCK.[L]	1xCarbamidomethyl [C14]; 1xTMT6plex [N-Term]; 1xTMT6plex [K1]		FALSE	3.09183e-05	0	1	4	4	A0A024R1N1	A0A024R1N1 [975-989]	1	2118.09	0	1.276	0.731	2.07	2.472					94.2	168.6	73.9	68.2	141.2	54								Not Found	Not Found	Not Found	Not Found	Not Found	Not Found	Not Found	High	Not Found	Not Found	Not Found	Not Found
	FALSE	High	[K].KLEEEQIILEDQNCK.[L]	1xCarbamidomethyl [C14]		FALSE	7.35653e-05	0	1	4	6	A0A024R1N1	A0A024R1N1 [975-989]	1	1888.93	0																					No Quan Labels	Not Found	Not Found	Not Found	Not Found	High	High	Not Found	Not Found	Not Found	Not Found	Not Found	Not Found
	FALSE	High	[K].NFINNPLAQADWAAK.[K]	1xTMT6plex [K15]; 1xTMT6plex [N-Term]		FALSE	6.81142e-07	0	1	6	4	A0A024R1N1	A0A024R1N1 [15-29]	0	2131.17	0	1.262	0.536	2.906	2.857					81.8	176.9	64.8	61.9	179.9	34.7								Not Found	Not Found	Not Found	Not Found	High	Not Found	Not Found	Not Found	Not Found	Not Found	Not Found	Not Found
	FALSE	High	[K].NFINNPLAQADWAAK.[K]	1xTMT6plex [K15]; 1xTMT6plex [N-Term]		FALSE	2.02953e-06	0	1	6	10	A0A024R1N1	A0A024R1N1 [15-29]	0	1902.01	0	1.101	0.77	3.422	2.436	1	1	0.807437	1	89.6	130.1	81.4	53.4	182.8	62.6	8.34	16.6	18.28	14.71	12.92	28.66		Not Found	High	High	Not Found	Not Found	Not Found	Not Found	High	High	Not Found	Not Found	Not Found
	FALSE	High	[K].NFINNPLAQADWAAK.[K]			FALSE	3.14641e-05	0	1	6	4	A0A024R1N1	A0A024R1N1 [15-29]	0	1672.84	0																					No Quan Labels	Not Found	Not Found	High	High	Not Found	Not Found	Not Found	Not Found	Not Found	Not Found	Not Found	Not Found
	FALSE	High	[K].NSFREQLEEEEEAK.[H]	1xTMT6plex [K14]; 1xTMT6plex [N-Term]		FALSE	6.2106e-05	0	1	3	6	A0A024R1N1	A0A024R1N1 [1339-1352]	1	2196.12	0	0.554	0.595	0.53	2.409	0.360349	1	0.689878	0.123921	48	253.1	86.6	105.1	55.6	51.5	34.66	3.82	7.7	9.49	18.94	15.04		Not Found	Not Found	Not Found	Not Found	Not Found	Not Found	Not Found	High	High	High	Not Found	Not Found
	FALSE	High	[K].NSFREQLEEEEEAK.[H]	1xTMT6plex [N-Term]; 1xTMT6plex [K14]		FALSE	2.23591e-05	0	1	3	4	A0A024R1N1	A0A024R1N1 [1339-1352]	1	1966.96	0	0.352	0.478	0.733	2.127	1	1	1	1	39.7	217	112.6	102.1	74.8	53.9	1.01	9.06	10.71	3.95	32.56	25.18		Not Found	Not Found	Not Found	Not Found	Not Found	High	Not Found	High	Not Found	Not Found	Not Found	Not Found
	FALSE	High	[KR].TQLEELEDELQATEDAK.[L]	1xTMT6plex [K17]; 1xTMT6plex [N-Term]		FALSE	2.74665e-06	0	2	10	4	P35580; A0A024R1N1	P35580 [1546-1562]; A0A024R1N1 [1539-1555]	0	2420.24	0	1.511	1.132	1.8	2.325					96.8	166.4	64	71.6	128.8	72.5							Shared	Not Found	Not Found	Not Found	Not Found	Not Found	Not Found	Not Found	High	Not Found	Not Found	Not Found	Not Found
	FALSE	High	[KR].TQLEELEDELQATEDAK.[L]	1xTMT6plex [K17]; 1xTMT6plex [N-Term]		FALSE	2.08887e-06	0	2	10	6	P35580; A0A024R1N1	P35580 [1546-1562]; A0A024R1N1 [1539-1555]	0	2191.08	0	1.179	1.118	1.879	1.784	1	1	1	1	85.6	138	72.6	77.4	145.4	81.1	1.29	3.69	8.46	9.13	9.53	8.32	Shared	Not Found	Not Found	Not Found	Not Found	Not Found	High	High	Not Found	Not Found	Not Found	Not Found	Not Found
	FALSE	High	[KR].TQLEELEDELQATEDAK.[L]			FALSE	3.59816e-06	0	2	10	4	P35580; A0A024R1N1	P35580 [1546-1562]; A0A024R1N1 [1539-1555]	0	1961.92	0																					No Quan Labels	Not Found	Not Found	Not Found	Not Found	High	Not Found	Not Found	Not Found	Not Found	Not Found	Not Found	Not Found
	FALSE	High	[R].YEILTPNSIPK.[G]	1xTMT6plex [K11]; 1xTMT6plex [N-Term]		FALSE	7.38014e-05	0	1	4	2	A0A024R1N1	A0A024R1N1 [721-731]	0	1733.02	0	1.902	1.082	1.966	1.59					126.6	116.8	66.6	73.5	144.5	72								High	Not Found	Not Found	Not Found	Not Found	Not Found	Not Found	Not Found	Not Found	Not Found	Not Found	Not Found
	FALSE	High	[K].LQVELDNVTGLLSQSDSK.[S]			FALSE	1.1864e-06	0	1	3	4	A0A024R1N1	A0A024R1N1 [1278-1295]	0	1946.01	0																					No Quan Labels	Not Found	Not Found	Not Found	Not Found	Not Found	Not Found	Not Found	Not Found	Not Found	Not Found	Not Found	Not Found
	FALSE	High	[K].QTLENERGELANEVK.[V]	1xTMT6plex [K15]; 1xTMT6plex [N-Term]		FALSE	2.3914e-05	0	1	3	4	A0A024R1N1	A0A024R1N1 [1220-1234]	1	2188.2	0	1.897	1.671	2.071	2.445	1	1	1	0.85279	101.7	157.3	53.6	64.4	133.3	89.6	3.13	1.89	24.88	4.13	1.21	16.43		Not Found	Not Found	Not Found	Not Found	Not Found	Not Found	Not Found	Not Found	High	High	Not Found	Not Found
	FALSE	High	[K].RQLEEAEEEAQR.[A]	1xTMT6plex [N-Term]		FALSE	2.0755e-05	0	1	3	2	A0A024R1N1	A0A024R1N1 [1877-1888]	1	1716.87	0	1.192	1.255	1.731	2.702					81.1	181.8	68	67.3	116.4	85.4								Not Found	Not Found	Not Found	Not Found	Not Found	Not Found	High	Not Found	Not Found	Not Found	Not Found	Not Found
	FALSE	High	[R].RGDLPFVVPR.[R]	1xTMT6plex [N-Term]		FALSE	6.7196e-05	0	1	3	4	A0A024R1N1	A0A024R1N1 [1923-1932]	1	1384.83	0	1.454	0.405	4.593	3.996	1	1	0.104051	0.132777	118.6	152.9	81.6	38.3	175.7	33	6.46	16.91	13.84	36.29	1.24	28.28		Not Found	Not Found	Not Found	Not Found	Not Found	Not Found	Not Found	Not Found	High	High	Not Found	Not Found
	FALSE	High	[R].IMGIPEEEQMGLLR.[V]	1xOxidation [M]; 1xTMT6plex [N-Term]		FALSE	1.53378e-05	0	1	3	5	A0A024R1N1	A0A024R1N1 [328-341]	0	1860.98	0	0.852	0.451	3.745	2.662	1	1	1	1	71.9	145.8	84.4	54.8	205.1	38.1	3.68	29.37	29.36	45.55	3.04	40.35		Not Found	Not Found	High	Not Found	High	Not Found	High	Not Found	Not Found	Not Found	Not Found	Not Found
	FALSE	High	[R].IIGLDQVAGMSETALPGAFK.[T]	1xOxidation [M10]		FALSE	6.63145e-06	0	1	4	4	A0A024R1N1	A0A024R1N1 [618-637]	0	2034.06	0																					No Quan Labels	Not Found	Not Found	Not Found	Not Found	Not Found	High	Not Found	Not Found	Not Found	Not Found	Not Found	Not Found
	FALSE	High	[K].GAGDGSDEEVDGKADGAEAKPAE.[-]	1xPhospho [S6]; TMT6plex [K]; 1xTMT6plex [N-Term]	A0A024R1N1 1xPhospho [S1943]	FALSE	1.87902e-05	0	1	3	12	A0A024R1N1	A0A024R1N1 [1938-1960]	1	2713.22	0	4.251	5.576	0.263	0.26	1	1	1	1	199.9	15.5	47	59.6	15.7	262.2	5.27	4.83	5.16	10.12	8.56	5.89		High	High	High	High	High	Not Found	Not Found	Not Found	Not Found	Not Found	Not Found	Not Found
	FALSE	High	[K].GAGDGSDEEVDGK.[A]	1xPhospho [S6]; 1xTMT6plex [K13]; 1xTMT6plex [N-Term]	A0A024R1N1 1xPhospho [S1943]	FALSE	3.44604e-06	0	1	3	53	A0A024R1N1	A0A024R1N1 [1938-1950]	0	1773.79	0	0.753	1.07	0.361	0.294	1	1	1	1	88.3	47.7	117.3	162.5	58.7	125.5	11.98	14.62	16.56	8.57	10.6	19.11		High	High	High	High	High	High	High	High	Not Found	Not Found	High	Not Found
	FALSE	High	[K].GAGDGSDEEVDGK.[A]	1xTMT6plex [K13]; 1xTMT6plex [N-Term]		FALSE	3.81146e-06	0	1	3	4	A0A024R1N1	A0A024R1N1 [1938-1950]	0	1693.83	0	0.755	1.025	0.461	0.807	1	1	1	1	77.5	111.9	102.7	138.7	63.9	105.2	4.97	0.32	1.53	2.01	20.29	4.98		Not Found	Not Found	Not Found	Not Found	High	High	Not Found	Not Found	Not Found	Not Found	Not Found	Not Found
	FALSE	High	[K].ADFCIIHYAGK.[V]	1xCarbamidomethyl [C4]		FALSE	7.12368e-05	0	2	5	2	P35580; A0A024R1N1	P35580 [573-583]; A0A024R1N1 [566-576]	0	1294.62	0																					No Quan Labels	Not Found	Not Found	Not Found	Not Found	Not Found	Not Found	Not Found	Not Found	Not Found	Not Found	Not Found	High
	FALSE	High	[K].ADFCIIHYAGK.[V]	1xCarbamidomethyl [C4]; 1xTMT6plex [N-Term]; 1xTMT6plex [K11]		FALSE	5.96864e-05	0	2	5	6	P35580; A0A024R1N1	P35580 [573-583]; A0A024R1N1 [566-576]	0	1523.79	0	1.549	0.675	3.022	2.577	1	1	1	1	105.4	148.7	68	57.7	174.3	45.9	47.55	9.78	7.66	95.03	38.15	60.6	Shared	Not Found	Not Found	Not Found	Not Found	Not Found	High	Not Found	Not Found	High	High	Not Found	Not Found
	FALSE	High	[K].RDLGEELEALK.[T]	1xTMT6plex [K11]; 1xTMT6plex [N-Term]		FALSE	5.71578e-05	0	1	7	12	A0A024R1N1	A0A024R1N1 [1135-1145]	1	1731.01	0	0.874	0.655	1.216	1.658	1	1	1	1	80	157.8	91.5	95.2	115.7	59.9	10.25	11.51	8.35	8.44	11.53	4.96		Not Found	High	High	Not Found	Not Found	Not Found	Not Found	Not Found	Not Found	Not Found	Not Found	Not Found
	FALSE	High	[R].LTEMETLQSQLMAEK.[L]	1xOxidation [M]; 1xTMT6plex [K15]; 1xTMT6plex [N-Term]		FALSE	5.34503e-06	0	1	4	4	A0A024R1N1	A0A024R1N1 [868-882]	0	2226.18	0	1.473	0.901	3.007	2.122	1	1	0.544541	1	106.6	123.2	72.4	58	174.6	65.2	1.79	7.5	9.28	21.99	13.25	16.61		Not Found	Not Found	Not Found	High	Not Found	Not Found	Not Found	High	Not Found	Not Found	Not Found	Not Found
	FALSE	High	[R].LTEMETLQSQLMAEK.[L]	2xOxidation [M4; M12]; 1xTMT6plex [K15]; 1xTMT6plex [N-Term]		FALSE	1.00925e-05	0	1	4	6	A0A024R1N1	A0A024R1N1 [868-882]	0	2242.17	0	1.586	1.439	1.086	0.731	1	1	1	1	130.6	69.7	82.3	95.3	103.5	118.5	20.97	38.64	2.97	16.45	23.01	19.94		Not Found	High	High	High	Not Found	Not Found	Not Found	Not Found	Not Found	Not Found	Not Found	Not Found
	FALSE	High	[K].QIATLHAQVADMK.[K]	1xTMT6plex [K13]; 1xTMT6plex [N-Term]		FALSE	7.10072e-05	0	1	3	2	A0A024R1N1	A0A024R1N1 [1358-1370]	0	1884.08	0	0.837	0.509	3.057	3.548					61	200.2	72.9	56.4	172.4	37.1								Not Found	Not Found	Not Found	Not Found	Not Found	Not Found	Not Found	Not Found	Not Found	Not Found	High	Not Found
	FALSE	High	[R].ELESQISELQEDLESER.[A]	1xTMT6plex [N-Term]		FALSE	4.81568e-06	0	1	4	7	A0A024R1N1	A0A024R1N1 [1108-1124]	0	2263.11	0	0.696	1.041	1.621	2.096	1	1	1	1	58.7	163.9	84.4	78.2	126.8	87.9	58.43	11.59	19.85	4.75	1.64	8.52		Not Found	Not Found	Not Found	Not Found	Not Found	Not Found	High	High	Not Found	Not Found	Not Found	Not Found
	FALSE	High	[R].ELESQISELQEDLESER.[A]			FALSE	4.81289e-05	0	1	4	2	A0A024R1N1	A0A024R1N1 [1108-1124]	0	2033.95	0																					No Quan Labels	Not Found	Not Found	Not Found	Not Found	Not Found	High	Not Found	Not Found	Not Found	Not Found	Not Found	Not Found
	FALSE	High	[K].SMEAEMIQLQEELAAAER.[A]	1xOxidation [M2]; 1xTMT6plex [N-Term]		FALSE	2.17343e-05	0	1	3	2	A0A024R1N1	A0A024R1N1 [1677-1694]	0	2294.12	0	1.551	1.216	2.506	2.194					96.9	140.4	62.5	64	160.3	76								Not Found	Not Found	Not Found	Not Found	Not Found	Not Found	Not Found	High	Not Found	Not Found	Not Found	Not Found
	FALSE	High	[R].SMMQDREDQSILCTGESGAGK.[T]	1xCarbamidomethyl [C13]; 1xTMT6plex [K21]; 1xTMT6plex [N-Term]		FALSE	4.61224e-06	0	1	4	2	A0A024R1N1	A0A024R1N1 [160-180]	1	2758.32	0	0.79	1.081	0.973	1.795					66.1	171.4	83.7	95.5	92.9	90.4								Not Found	High	Not Found	Not Found	Not Found	Not Found	Not Found	Not Found	Not Found	Not Found	Not Found	Not Found
	FALSE	High	[R].SMMQDREDQSILCTGESGAGK.[T]	1xCarbamidomethyl [C13]; 1xOxidation [M]; 1xTMT6plex [K21]; 1xTMT6plex [N-Term]		FALSE	3.51805e-05	0	1	4	10	A0A024R1N1	A0A024R1N1 [160-180]	1	2774.32	0	1.166	0.858	1.742	2.03	1	1	1	1	97.3	147.9	83.5	72.8	126.9	71.6	35.12	50.63	7.1	11.64	34.59	70.91		Not Found	High	Not Found	Not Found	Not Found	Not Found	Not Found	Not Found	Not Found	Not Found	High	High
	FALSE	High	[R].SMMQDREDQSILCTGESGAGK.[T]	1xCarbamidomethyl [C13]; 2xOxidation [M2; M3]; 1xTMT6plex [K21]; 1xTMT6plex [N-Term]		FALSE	6.54618e-05	0	1	4	6	A0A024R1N1	A0A024R1N1 [160-180]	1	2790.31	0	1.283	1.002	1.455	1.743	1	1	1	1	101.7	141	79.2	80.9	117.8	79.4	18.13	26.31	5.74	8.12	11.71	30.76		Not Found	Not Found	Not Found	Not Found	Not Found	Not Found	Not Found	Not Found	Not Found	High	High	High
	FALSE	High	[K].EQADFAIEALAK.[A]	1xTMT6plex [K12]; 1xTMT6plex [N-Term]		FALSE	6.14945e-06	0	1	6	8	A0A024R1N1	A0A024R1N1 [408-419]	0	1763.99	0	1.361	1.041	1.196	1.549	1	1	1	1	107.7	136.9	79.1	88.4	105.7	82.3	5.27	12.7	11.73	12.91	18.44	6.95		Not Found	Not Found	High	High	Not Found	Not Found	Not Found	Not Found	Not Found	Not Found	Not Found	Not Found
	FALSE	High	[R].EQLEEEEEAK.[H]	1xTMT6plex [K10]; 1xTMT6plex [N-Term]		FALSE	7.41257e-06	0	1	3	10	A0A024R1N1	A0A024R1N1 [1343-1352]	0	1691.87	0	0.789	0.839	1.085	1.649	1	1	1	1	70.8	160.7	89.8	97.5	105.7	75.4	37.47	23.3	13.58	8.75	36.97	18.78		High	High	High	High	High	Not Found	Not Found	Not Found	Not Found	Not Found	Not Found	Not Found
	FALSE	High	[K].ANLQIDQINTDLNLER.[S]	1xTMT6plex [N-Term]		FALSE	2.13524e-05	0	1	3	2	A0A024R1N1	A0A024R1N1 [1755-1770]	0	2099.13	0	0.971	0.95	2.006	1.572					84	119.3	86.4	75.9	152.3	82.1								Not Found	Not Found	Not Found	High	Not Found	Not Found	Not Found	Not Found	Not Found	Not Found	Not Found	Not Found
	FALSE	High	[K].ANLQIDQINTDLNLER.[S]			FALSE	1.06869e-06	0	1	3	6	A0A024R1N1	A0A024R1N1 [1755-1770]	0	1869.97	0																					No Quan Labels	Not Found	Not Found	Not Found	Not Found	Not Found	Not Found	Not Found	Not Found	Not Found	High	Not Found	Not Found
	FALSE	High	[K].ERNTDQASMPDNTAAQK.[V]	1xOxidation [M9]; 1xTMT6plex [K17]; 1xTMT6plex [N-Term]		FALSE	1.32014e-05	0	1	7	4	A0A024R1N1	A0A024R1N1 [357-373]	1	2351.17	0	1.102	0.957	1.436	2.324	1	1	1	1	84.3	178.6	76.5	76.9	110.4	73.3	6.26	4.69	2.36	1.9	5.23	10.27		Not Found	Not Found	Not Found	Not Found	Not Found	Not Found	Not Found	High	High	Not Found	Not Found	Not Found
	FALSE	High	[K].ERNTDQASMPDNTAAQK.[V]	1xTMT6plex [K17]; 1xTMT6plex [N-Term]		FALSE	6.24712e-07	0	1	7	4	A0A024R1N1	A0A024R1N1 [357-373]	1	2335.17	0	0.793	0.849	1.243	2.472	1	1	1	1	63.1	204.3	79.6	82.7	102.7	67.6	54.52	2.68	21.02	40.04	2.71	8.63		Not Found	Not Found	Not Found	Not Found	Not Found	Not Found	Not Found	Not Found	High	High	Not Found	Not Found
	FALSE	High	[K].ERNTDQASMPDNTAAQK.[V]	1xOxidation [M9]; 1xTMT6plex [N-Term]		FALSE	5.15053e-05	0	1	7	4	A0A024R1N1	A0A024R1N1 [357-373]	1	2122	0	1.059	0.997	1.259	1.149	1	1	1	1	104.8	100.3	98.9	87.3	110	98.6	29.53	24.72	9.28	1.92	30.36	16.96		Not Found	Not Found	Not Found	Not Found	Not Found	High	High	Not Found	Not Found	Not Found	Not Found	Not Found
	FALSE	High	[K].ERNTDQASMPDNTAAQK.[V]	1xTMT6plex [N-Term]; 1xTMT6plex [K17]		FALSE	9.91319e-06	0	1	7	4	A0A024R1N1	A0A024R1N1 [357-373]	1	2106.01	0	1.423	1.115	1.824	2.795					90.8	186.1	63.9	66.6	121.5	71.2								Not Found	Not Found	Not Found	Not Found	Not Found	Not Found	High	Not Found	Not Found	Not Found	Not Found	Not Found
	FALSE	High	[R].FLSNGHVTIPGQQDK.[D]			FALSE	7.99011e-05	3.96551e-05	1	3	6	A0A024R1N1	A0A024R1N1 [302-316]	0	1640.84	0																					No Quan Labels	Not Found	High	High	Not Found	Not Found	Not Found	Not Found	Not Found	Not Found	Not Found	Not Found	Not Found
	FALSE	High	[K].GAGDGSDEEVDGK.[A]	1xPhospho [S6]; 1xTMT6plex [N-Term]; 1xTMT6plex [K13]	A0A024R1N1 1xPhospho [S1943]	FALSE	9.55096e-05	3.96551e-05	1	3	16	A0A024R1N1	A0A024R1N1 [1938-1950]	0	1544.63	0	0.789	0.859	0.44	0.281	1	1	1	1	104.1	40.9	132	145.7	64	113.4	26.4	17.37	9.36	9.83	9.92	5.6		High	Not Found	High	Not Found	High	High	Not Found	Not Found	Not Found	High	Not Found	High
	FALSE	High	[R].EMEAELEDERK.[Q]	1xOxidation [M2]; 1xTMT6plex [N-Term]		FALSE	8.47885e-05	3.96551e-05	1	3	2	A0A024R1N1	A0A024R1N1 [1593-1603]	1	1623.77	0	0.941	0.91	1.675	1.939					86.1	142.6	91.5	73.5	123.1	83.3								Not Found	Not Found	Not Found	Not Found	High	Not Found	Not Found	Not Found	Not Found	Not Found	Not Found	Not Found
	FALSE	High	[K].HEAMITDLEER.[L]	1xOxidation [M4]		FALSE	0.000100186	3.96551e-05	1	4	4	A0A024R1N1	A0A024R1N1 [1025-1035]	0	1359.62	0																					No Quan Labels	Not Found	High	High	Not Found	Not Found	Not Found	Not Found	Not Found	Not Found	Not Found	Not Found	Not Found
	FALSE	High	[K].TDLLLEPYNK.[Y]	1xTMT6plex [K10]; 1xTMT6plex [N-Term]		FALSE	7.88998e-05	3.96551e-05	1	3	5	A0A024R1N1	A0A024R1N1 [290-299]	0	1663.97	0	1.724	1.058	1.907	1.976	1	1	1	1	117.2	138.8	67.9	70.2	134	71.9	4.99	12.74	7.66	4.13	5.69	2.23		Not Found	Not Found	Not Found	Not Found	Not Found	Not Found	Not Found	Not Found	High	High	High	Not Found
	FALSE	High	[K].VIQYLAYVASSHK.[S]	1xTMT6plex [K13]; 1xTMT6plex [N-Term]		FALSE	0.00011197	3.96551e-05	1	5	4	A0A024R1N1	A0A024R1N1 [187-199]	0	1937.13	0	1.336	1.001	0.601	0.587					173.8	44.5	130.1	75.7	45.5	130.3								High	Not Found	Not Found	Not Found	Not Found	Not Found	Not Found	Not Found	Not Found	Not Found	Not Found	Not Found
	FALSE	High	[K].ASITALEAK.[I]	1xTMT6plex [K9]; 1xTMT6plex [N-Term]		FALSE	0.000116895	3.96551e-05	1	3	4	A0A024R1N1	A0A024R1N1 [1807-1815]	0	1361.84	0	2.541	1.39	3.118	2.441	1	1	1	1	148	116.4	58.2	47.7	148.7	81	5.85	12.41	4.91	6.79	6.8	4.82		Not Found	Not Found	Not Found	Not Found	Not Found	Not Found	Not Found	High	High	Not Found	Not Found	Not Found
	FALSE	High	[K].VMQEQGTHPK.[F]	1xTMT6plex [K10]; 1xTMT6plex [N-Term]		FALSE	0.000109408	3.96551e-05	1	3	4	A0A024R1N1	A0A024R1N1 [546-555]	0	1612.89	0	1.668	1.305	2.16	1.948	1	1	0.290644	0.441439	120.9	119	72.5	61.1	131.9	94.6	5.41	20.86	18.94	8.98	2.43	4.24		Not Found	Not Found	Not Found	High	High	Not Found	Not Found	Not Found	Not Found	Not Found	Not Found	Not Found
	FALSE	High	[KR].KEEELQAALAR.[LAV]			FALSE	9.87065e-05	3.96551e-05	1	10	4	A0A024R1N1	A0A024R1N1 [1081-1091]	1	1257.68	0																					No Quan Labels	Not Found	Not Found	Not Found	Not Found	Not Found	Medium	Not Found	Not Found	Not Found	Not Found	Not Found	Not Found
	FALSE	High	[K].DLEGLSQRHEEK.[V]	1xTMT6plex [K12]; 1xTMT6plex [N-Term]		FALSE	0.000108458	3.96551e-05	1	2	6	A0A024R1N1	A0A024R1N1 [1393-1404]	1	1899.03	0	0.513	0.537	0.829	2.505	1	1	1	1	56	217.5	109.1	86.8	72	58.6	12.5	1.53	8.54	7.83	6.3	18.22		High	Not Found	Not Found	Not Found	Not Found	Not Found	Not Found	Not Found	Not Found	Not Found	Not Found	High
	FALSE	High	[K].DLEAHIDSANK.[N]	1xTMT6plex [K11]; 1xTMT6plex [N-Term]		FALSE	0.000108774	3.96551e-05	1	3	6	A0A024R1N1	A0A024R1N1 [1621-1631]	0	1670.91	0	0.364	0.475	0.551	1.774	1	1	1	1	38.1	217.4	104.8	122.5	67.5	49.7	20.13	12.18	21.95	7.47	13.91	27.41		Not Found	Not Found	High	Not Found	Not Found	Not Found	Not Found	Not Found	Not Found	Not Found	High	High
	FALSE	High	[K].KMEDSVGCLETAEEVK.[R]	1xCarbamidomethyl [C8]		FALSE	9.66631e-05	3.96551e-05	1	2	4	A0A024R1N1	A0A024R1N1 [1372-1387]	1	1824.84	0																					No Quan Labels	Not Found	Not Found	Not Found	Not Found	Not Found	High	Not Found	Not Found	Not Found	Not Found	Not Found	Not Found
	FALSE	High	[R].AGVLAHLEEER.[D]	1xTMT6plex [N-Term]		FALSE	9.84126e-05	3.96551e-05	2	5	4	P35580; A0A024R1N1	P35580 [772-782]; A0A024R1N1 [765-775]	0	1452.8	0	1.291	1.083	0.977	1.619	1	1	1	1	97.2	155.8	75.2	96.2	94	81.5	30.71	11.71	6.52	11.72	19.48	29.21	Shared	Not Found	High	High	Not Found	Not Found	Not Found	Not Found	Not Found	Not Found	Not Found	Not Found	Not Found
	FALSE	High	[K].THEAQIQEMR.[Q]	1xTMT6plex [N-Term]		FALSE	9.78269e-05	3.96551e-05	1	3	2	A0A024R1N1	A0A024R1N1 [1182-1191]	0	1471.75	0	1.285	0.597	1.027	2.348					103.9	196.9	80.9	83.9	86.1	48.3								Not Found	Not Found	Not Found	Not Found	Not Found	Not Found	Not Found	Not Found	High	Not Found	Not Found	Not Found
	FALSE	High	[K].HSQAVEELAEQLEQTK.[R]	1xTMT6plex [K16]; 1xTMT6plex [N-Term]		FALSE	0.000103193	3.96551e-05	1	3	6	A0A024R1N1	A0A024R1N1 [1194-1209]	0	2069.07	0	0.825	0.525	1.217	1.759	1	1	1	1	73.7	172.6	89.3	98.1	119.4	46.9	46.78	28.9	0.65	11.1	31.48	76.47		Not Found	Not Found	Not Found	Not Found	Not Found	Not Found	Not Found	Not Found	High	Not Found	High	Not Found
	FALSE	High	[K].ADFCIIHYAGK.[V]	1xCarbamidomethyl [C4]; 1xTMT6plex [K11]; 1xTMT6plex [N-Term]		FALSE	9.07204e-05	3.96551e-05	2	5	4	P35580; A0A024R1N1	P35580 [573-583]; A0A024R1N1 [566-576]	0	1752.95	0	1.358	0.917	1.886	1.744	1	1	1	1	106.6	129.2	78.5	74.1	139.7	72	5.73	22.1	8.28	16.33	2.91	27.8	Shared	Not Found	High	High	Not Found	Not Found	Not Found	Not Found	Not Found	Not Found	Not Found	Not Found	Not Found
	FALSE	High	[R].ALEEAMEQK.[A]	1xTMT6plex [K9]; 1xTMT6plex [N-Term]		FALSE	0.000107202	3.96551e-05	1	3	4	A0A024R1N1	A0A024R1N1 [1484-1492]	0	1506.82	0	1.927	1.329	2.238	2.08					124.5	127.1	64.6	61.1	136.8	85.8								Not Found	Not Found	Not Found	Not Found	Not Found	Not Found	Not Found	Not Found	Not Found	Not Found	Not Found	High
	FALSE	High	[R].EDQSILCTGESGAGK.[T]	1xCarbamidomethyl [C7]		FALSE	0.000125119	7.07462e-05	2	12	2	P35580; A0A024R1N1	P35580 [170-184]; A0A024R1N1 [166-180]	0	1551.7	0																					No Quan Labels	Not Found	Not Found	Not Found	Not Found	Not Found	High	Not Found	Not Found	Not Found	Not Found	Not Found	Not Found
	FALSE	High	[R].DELADEIANSSGK.[G]			FALSE	0.000138333	7.07462e-05	1	3	2	A0A024R1N1	A0A024R1N1 [1704-1716]	0	1348.62	0																					No Quan Labels	Not Found	Not Found	Not Found	Not Found	Not Found	Not Found	Not Found	Not Found	Not Found	Not Found	Not Found	Not Found
	FALSE	High	[K].VSHLLGINVTDFTR.[G]			FALSE	0.000138716	7.07462e-05	1	3	4	A0A024R1N1	A0A024R1N1 [374-387]	0	1571.85	0																					No Quan Labels	Not Found	Not Found	Not Found	Not Found	Not Found	Not Found	Not Found	Not Found	Not Found	Not Found	High	High
	FALSE	High	[K].TDLLLEPYNK.[Y]	1xTMT6plex [N-Term]; 1xTMT6plex [K10]		FALSE	0.000141426	7.07462e-05	1	3	6	A0A024R1N1	A0A024R1N1 [290-299]	0	1434.8	0	1.557	1.331	1.881	1.586	1	1	0.357456	1	114.3	111.7	73.4	70.4	132.5	97.7	0.64	0.74	3	16.05	20.61	18.82		High	Not Found	Not Found	Not Found	Not Found	Not Found	High	Not Found	Not Found	Not Found	Not Found	High
	FALSE	High	[R].DLQGRDEQSEEK.[K]	1xTMT6plex [K12]; 1xTMT6plex [N-Term]		FALSE	0.000134923	7.07462e-05	1	3	6	A0A024R1N1	A0A024R1N1 [1572-1583]	1	1662.81	0	0.414	0.592	0.692	1.671	1	1	1	1	38.5	205.5	93	123	85.1	55	2.99	8.96	6.9	18.09	13.76	16.82		High	High	Not Found	Not Found	Not Found	Not Found	High	Not Found	Not Found	Not Found	Not Found	Not Found
	FALSE	High	[K].DMFQETMEAMR.[I]	1xTMT6plex [N-Term]		FALSE	0.000137188	7.07462e-05	1	3	4	A0A024R1N1	A0A024R1N1 [317-327]	0	1617.73	0	1.33	0.347	2.02	5.051		1	1	1	74.9	281.1	56.3	55.7	112.4	19.6		38.42	25.24	31.54	23.04	2.82		Not Found	Not Found	Not Found	Not Found	High	Not Found	Not Found	Not Found	Not Found	Not Found	Not Found	Not Found
	FALSE	High	[K].VMQEQGTHPK.[F]	1xOxidation [M2]; 1xTMT6plex [K10]; 1xTMT6plex [N-Term]		FALSE	0.000149435	0.000118124	1	3	6	A0A024R1N1	A0A024R1N1 [546-555]	0	1628.88	0	1.751	1.522	2.159	1.424	1	1	1	1	128.2	89.2	73.2	62.6	135.2	111.5	5.39	29.48	9.99	8.56	5.19	5.61		High	High	Not Found	High	Not Found	Not Found	Not Found	Not Found	Not Found	Not Found	Not Found	Not Found
	FALSE	High	[KR].KEEELQAALAR.[LAV]	1xTMT6plex [K1]; 1xTMT6plex [N-Term]		FALSE	0.000154872	0.000118124	1	10	1	A0A024R1N1	A0A024R1N1 [1081-1091]	1	1716.01	0	1.27	1.234	1.175	1.686					100.1	141.4	78.8	83.9	98.6	97.3								Not Found	Not Found	High	Not Found	Not Found	Not Found	Not Found	Not Found	Not Found	Not Found	Not Found	Not Found
	FALSE	High	[K].ERNTDQASMPDNTAAQK.[V]	1xOxidation [M9]		FALSE	0.000148207	0.000118124	1	7	5	A0A024R1N1	A0A024R1N1 [357-373]	1	1892.84	0																					No Quan Labels	Not Found	Not Found	Not Found	Not Found	Not Found	Not Found	Not Found	Not Found	Not Found	Not Found	Not Found	Not Found
	FALSE	High	[K].DLEAHIDSANK.[N]			FALSE	0.000165019	0.000118124	1	3	2	A0A024R1N1	A0A024R1N1 [1621-1631]	0	1212.59	0																					No Quan Labels	Not Found	Not Found	Not Found	Not Found	Not Found	Not Found	Not Found	Not Found	Not Found	Not Found	Not Found	Not Found
	FALSE	High	[R].EMEAELEDERK.[Q]	1xTMT6plex [N-Term]		FALSE	0.000187897	0.000118124	1	3	4	A0A024R1N1	A0A024R1N1 [1593-1603]	1	1607.78	0	0.888	0.797	1.593	1.912					82.1	149.3	92.4	78.1	124.4	73.7								Not Found	Not Found	Not Found	Not Found	High	Not Found	Not Found	Not Found	Not Found	Not Found	Not Found	Not Found
	FALSE	High	[R].TEMEDLMSSK.[D]	1xTMT6plex [N-Term]; 1xTMT6plex [K10]		FALSE	0.000179996	0.000118124	1	4	6	A0A024R1N1	A0A024R1N1 [1504-1513]	0	1399.66	0	1.702	1.124	2.875	2.273	1	1	1	1	112.7	128.2	66.2	56.4	162.2	74.4	11.81	16.11	15.18	7.82	8.16	12.72		Not Found	Not Found	Not Found	Not Found	Not Found	Not Found	Not Found	Not Found	High	High	High	Not Found
	FALSE	High	[K].NLPIYSEEIVEMYK.[G]	1xOxidation [M12]		FALSE	0.000160076	0.000118124	1	5	6	A0A024R1N1	A0A024R1N1 [126-139]	0	1743.85	0																					No Quan Labels	Not Found	Not Found	Not Found	Not Found	Not Found	Not Found	Not Found	Not Found	Not Found	Not Found	High	Not Found
	FALSE	High	[K].RALEQQVEEMK.[T]	1xOxidation [M10]; 1xTMT6plex [K11]; 1xTMT6plex [N-Term]		FALSE	0.000165478	0.000118124	1	3	2	A0A024R1N1	A0A024R1N1 [1528-1538]	1	1835.01	0	1.342	1.006	1.298	1.84					99.3	156.7	74	85.2	110.5	74.4								Not Found	High	Not Found	Not Found	Not Found	Not Found	Not Found	Not Found	Not Found	Not Found	Not Found	Not Found
	FALSE	High	[R].ALEEAMEQK.[A]	1xOxidation [M6]; 1xTMT6plex [K9]; 1xTMT6plex [N-Term]		FALSE	0.000182057	0.000118124	1	3	7	A0A024R1N1	A0A024R1N1 [1484-1492]	0	1522.82	0	1.844	1.547	1.94	1.429	1	1	1	1	126.1	98	68.4	68.6	133.1	105.8	3.2	18.6	3.93	5.49	6.82	13.41		Not Found	Not Found	Not Found	Not Found	Not Found	Not Found	Not Found	Not Found	High	High	Not Found	High
	FALSE	High	[K].ALELDSNLYR.[I]	1xTMT6plex [N-Term]		FALSE	0.0001478	0.000118124	1	4	4	A0A024R1N1	A0A024R1N1 [746-755]	0	1422.78	0	1.529	1.364	1.914	1.646	1	1	1	1	114.9	111	75.1	67.4	129.1	102.4	5.33	9.6	2.5	4.78	2.9	21.14		Not Found	Not Found	Not Found	High	High	Not Found	Not Found	Not Found	Not Found	Not Found	Not Found	Not Found
	FALSE	High	[R].ALEQQVEEMK.[T]	1xTMT6plex [K10]; 1xTMT6plex [N-Term]		FALSE	0.000173025	0.000118124	1	3	2	A0A024R1N1	A0A024R1N1 [1529-1538]	0	1662.91	0	1.041	1.03	0.747	0.508					96.2	71.2	92.5	140.2	104.7	95.2								Not Found	Not Found	Not Found	Not Found	Not Found	Not Found	Not Found	Not Found	Not Found	Not Found	High	Not Found
	FALSE	High	[K].LQEMEGTVK.[S]	1xTMT6plex [K9]; 1xTMT6plex [N-Term]		FALSE	0.000183624	0.000118124	1	3	4	A0A024R1N1	A0A024R1N1 [1794-1802]	0	1492.84	0	1.615	1.36	1.577	1.598	1	1	1	1	116.5	119.9	72.1	75	118.3	98.1	13.72	5.38	3.13	12.98	16.4	21.77		Not Found	Not Found	Not Found	High	High	Not Found	Not Found	Not Found	Not Found	Not Found	Not Found	Not Found
	FALSE	High	[R].AGVLAHLEEERDLK.[I]	1xTMT6plex [K14]; 1xTMT6plex [N-Term]		FALSE	0.000191755	0.000118124	2	5	6	P35580; A0A024R1N1	P35580 [772-785]; A0A024R1N1 [765-778]	1	2038.17	0	1.503	0.937	1.55	2.668	1	1	1	1	106.7	181.9	71	68.2	105.7	66.5	10.21	2.67	10.28	23.89	17.14	0.69	Shared	Not Found	Not Found	Not Found	Not Found	High	High	Not Found	Not Found	Not Found	Not Found	Not Found	Not Found
	FALSE	High	[K].DVLLQVDDER.[R]	1xTMT6plex [N-Term]		FALSE	0.000147394	0.000118124	1	3	2	A0A024R1N1	A0A024R1N1 [1846-1855]	0	1430.77	0	0.69	0.639	1.153	2.098					60	196.1	87	93.5	107.8	55.6								Not Found	Not Found	Not Found	Not Found	Not Found	Not Found	Not Found	Not Found	Not Found	High	Not Found	Not Found
	FALSE	High	[R].CNGVLEGIR.[I]	1xCarbamidomethyl [C1]; 1xTMT6plex [N-Term]		FALSE	0.000146989	0.000118124	8	28	4	A7E2Y1; P13535; P35580; P12882; P12883; A0A024R1N1; Q9UKX2; Q9Y623	A7E2Y1 [744-752]; P13535 [698-706]; P35580 [701-709]; P12882 [699-707]; P12883 [695-703]; A0A024R1N1 [694-702]; Q9UKX2 [701-709]; Q9Y623 [699-707]	0	1246.68	0	1.038	3.441	0.925	1.057	1	1	1	1	79.5	63.9	76.6	60.5	55.9	263.6	5.93	6.97	8.85	0.44	5.66	3.98	Shared	Not Found	High	High	Not Found	Not Found	Not Found	Not Found	Not Found	Not Found	Not Found	Not Found	Not Found
	FALSE	High	[K].SGFEPASLK.[E]	1xTMT6plex [K9]; 1xTMT6plex [N-Term]		FALSE	0.00020593	0.000137039	1	6	6	A0A024R1N1	A0A024R1N1 [39-47]	0	1393.81	0	1.962	1.349	2.378	1.912	1	1	1	1	128.8	114.6	65.7	59.9	142.5	88.6	12.38	18.9	12.05	14.99	7.29	3.04		Not Found	Not Found	Not Found	Not Found	Not Found	Not Found	Not Found	High	High	High	Not Found	Not Found
	FALSE	High	[K].HEAMITDLEER.[L]			FALSE	0.000204688	0.000137039	1	4	2	A0A024R1N1	A0A024R1N1 [1025-1035]	0	1343.63	0																					No Quan Labels	Not Found	Not Found	Not Found	Not Found	Not Found	High	Not Found	Not Found	Not Found	Not Found	Not Found	Not Found
	FALSE	High	[R].CNGVLEGIR.[I]	1xCarbamidomethyl [C1]		FALSE	0.000212984	0.000137039	8	28	2	A7E2Y1; P13535; P35580; P12882; P12883; A0A024R1N1; Q9UKX2; Q9Y623	A7E2Y1 [744-752]; P13535 [698-706]; P35580 [701-709]; P12882 [699-707]; P12883 [695-703]; A0A024R1N1 [694-702]; Q9UKX2 [701-709]; Q9Y623 [699-707]	0	1017.51	0																					No Quan Labels	Not Found	Not Found	Not Found	Not Found	Not Found	Not Found	Not Found	High	Not Found	Not Found	Not Found	Not Found
	FALSE	High	[K].LQVELDNVTGLLSQSDSK.[S]	1xTMT6plex [K18]		FALSE	0.000198648	0.000137039	1	3	2	A0A024R1N1	A0A024R1N1 [1278-1295]	0	2175.17	0	1.016	1.391	0.413	0.498					112.4	58.1	110.7	116.7	48.2	153.9								Not Found	Not Found	Not Found	Not Found	High	Not Found	Not Found	Not Found	Not Found	Not Found	Not Found	Not Found
	FALSE	High	[K].KQELEEICHDLEAR.[V]	1xCarbamidomethyl [C8]; 1xTMT6plex [K1]; 1xTMT6plex [N-Term]		FALSE	0.000213644	0.000137039	1	3	4	A0A024R1N1	A0A024R1N1 [910-923]	1	2228.17	1	0.938	0.683	1.373	2.841	1	1	1	1	76.6	210.3	81.6	74	101.7	55.7	16.68	6.46	0.19	6.38	8.37	5.77		High	High	Not Found	Not Found	Not Found	Not Found	Not Found	Not Found	Not Found	Not Found	Not Found	Not Found
	FALSE	High	[R].CQHLQAEK.[K]	1xCarbamidomethyl [C1]; 1xTMT6plex [K8]; 1xTMT6plex [N-Term]		FALSE	0.000202846	0.000137039	1	3	2	A0A024R1N1	A0A024R1N1 [931-938]	0	1471.81	0	1.409	1.254	1.99	2.507					84.3	173.6	59.9	69.3	137.9	75.1								Not Found	Not Found	High	Not Found	Not Found	Not Found	Not Found	Not Found	Not Found	Not Found	Not Found	Not Found
	FALSE	High	[R].ASREEILAQAK.[E]	1xTMT6plex [K11]; 1xTMT6plex [N-Term]		FALSE	0.000196309	0.000137039	1	3	2	A0A024R1N1	A0A024R1N1 [1659-1669]	1	1674	0	1.426	1.145	1.635	1.885					115.4	129.7	80.9	68.8	112.5	92.6								Not Found	Not Found	High	Not Found	Not Found	Not Found	Not Found	Not Found	Not Found	Not Found	Not Found	Not Found
	FALSE	High	[R].IMGIPEEEQMGLLR.[V]	2xOxidation [M2; M10]; 1xTMT6plex [N-Term]		FALSE	0.000197474	0.000137039	1	3	9	A0A024R1N1	A0A024R1N1 [328-341]	0	1876.97	0	1.242	0.979	1.467	0.864	1	1	1	1	120	75	96.5	86.8	127.2	94.5	52.45	55.08	24.75	17.6	18.14	40.54		High	Not Found	High	Not Found	High	Not Found	Not Found	Not Found	Not Found	Not Found	Not Found	Not Found
	FALSE	High	[K].REQEVNILK.[K]	1xTMT6plex [K9]; 1xTMT6plex [N-Term]		FALSE	0.000257868	0.000146789	1	3	4	A0A024R1N1	A0A024R1N1 [1165-1173]	1	1586.96	0	1.483	1.125	1.753	1.822	1	1	1	1	117.1	125.5	79	68.9	120.7	88.9	12.5	7.72	10.64	15.56	8.29	4.71		Not Found	Not Found	High	High	Not Found	Not Found	Not Found	Not Found	Not Found	Not Found	Not Found	Not Found
	FALSE	High	[K].REQEVNILK.[K]	1xTMT6plex [N-Term]; 1xTMT6plex [K9]		FALSE	0.000315427	0.000146789	1	3	4	A0A024R1N1	A0A024R1N1 [1165-1173]	1	1357.8	0	1.557	1.363	2.386	1.842	1	1	1	1	109.9	113.9	70.6	61.8	147.6	96.2	3.13	7.89	0.89	0.37	7.14	6.07		Not Found	Not Found	Not Found	Not Found	Not Found	Not Found	Not Found	Not Found	Not Found	High	Medium	Not Found
	FALSE	High	[K].KVEAQLQELQVK.[F]			FALSE	0.000284673	0.000146789	1	3	2	A0A024R1N1	A0A024R1N1 [1249-1260]	1	1412.81	0																					No Quan Labels	Not Found	Not Found	Not Found	Not Found	Not Found	Not Found	Not Found	Not Found	Not Found	Not Found	Not Found	Not Found
	FALSE	High	[R].IMGIPEEEQMGLLR.[V]	1xOxidation [M2]		FALSE	0.000408969	0.000146789	1	3	2	A0A024R1N1	A0A024R1N1 [328-341]	0	1631.81	0																					No Quan Labels	Not Found	Not Found	Not Found	Not Found	Not Found	Not Found	Not Found	Not Found	Not Found	Not Found	Not Found	Not Found
	FALSE	High	[R].IMGIPEEEQMGLLR.[V]	1xTMT6plex [N-Term]		FALSE	0.000247326	0.000146789	1	3	2	A0A024R1N1	A0A024R1N1 [328-341]	0	1844.98	0	0.304	0.01	16.589	20.261					16.2	283.9	53.3	14	232.5									Not Found	Not Found	Not Found	Not Found	Not Found	Not Found	High	Not Found	Not Found	Not Found	Not Found	Not Found
	FALSE	High	[K].RDLGEELEALK.[T]			FALSE	0.000476679	0.000146789	1	7	4	A0A024R1N1	A0A024R1N1 [1135-1145]	1	1272.68	0																					No Quan Labels	Not Found	Not Found	Not Found	Not Found	Not Found	Not Found	Not Found	Not Found	Not Found	Not Found	Not Found	Not Found
	FALSE	High	[K].RDLGEELEALK.[T]	1xTMT6plex [K11]; 1xTMT6plex [N-Term]		FALSE	0.000361958	0.000146789	1	7	5	A0A024R1N1	A0A024R1N1 [1135-1145]	1	1501.84	0	0.908	0.692	1.998	2.043	1	1	1	1	81.7	148.4	89.9	72.7	145.2	62.2	1.58	4.45	5.03	1.27	2.17	1.83		Not Found	Not Found	Not Found	Not Found	Not Found	Not Found	Not Found	Not Found	High	High	Not Found	Not Found
	FALSE	High	[K].GALALEEK.[R]	1xTMT6plex [K8]; 1xTMT6plex [N-Term]		FALSE	0.000386093	0.000146789	1	3	5	A0A024R1N1	A0A024R1N1 [1717-1724]	0	1288.79	0	1.887	1.681	1.238	1.513	1	1	1	1	115.8	129	61.4	85.2	105.5	103.1	9.27	13.67	14.98	19.21	30.61	18.11		Not Found	Not Found	Not Found	High	High	Not Found	Not Found	Not Found	Not Found	Not Found	Not Found	Not Found
	FALSE	High	[K].QACVLMIK.[A]	1xCarbamidomethyl [C3]; 1xTMT6plex [K8]; 1xTMT6plex [N-Term]		FALSE	0.000423345	0.000146789	1	4	2	A0A024R1N1	A0A024R1N1 [738-745]	0	1420.84	0	1.628	0.989	2.296	2.449					111	150.7	68.1	61.5	141.3	67.4								Not Found	Not Found	High	Not Found	Not Found	Not Found	Not Found	Not Found	Not Found	Not Found	Not Found	Not Found
	FALSE	High	[K].LDPHLVLDQLR.[C]	1xTMT6plex [N-Term]		FALSE	0.000307834	0.000146789	2	5	7	P35580; A0A024R1N1	P35580 [690-700]; A0A024R1N1 [683-693]	0	1547.91	0	1.509	0.704	3.326	2.666	1	1	1	1	104.2	144.2	69.1	54.1	179.8	48.6	2.39	3.45	2.05	10.19	7.4	13.76	Shared	High	Not Found	Not Found	Not Found	Not Found	Not Found	Not Found	Not Found	Not Found	Not Found	Not Found	High
	FALSE	High	[K].LDPHLVLDQLR.[C]			FALSE	0.000244807	0.000146789	2	5	2	P35580; A0A024R1N1	P35580 [690-700]; A0A024R1N1 [683-693]	0	1318.75	0																					No Quan Labels	Not Found	Not Found	Not Found	Not Found	Not Found	Not Found	Not Found	Not Found	Not Found	Not Found	Not Found	Not Found
	FALSE	High	[R].KGAGDGSDEEVDGK.[A]	1xPhospho [S7]; 2xTMT6plex [K1; K14]; 1xTMT6plex [N-Term]	A0A024R1N1 1xPhospho [S1943]	FALSE	0.000291295	0.000146789	1	3	1	A0A024R1N1	A0A024R1N1 [1937-1950]	1	2131.05	0	1.845	1.184	0.375	0.428					157.5	60.7	85.4	142	53.3	101.1								Not Found	Not Found	Not Found	Not Found	Not Found	Not Found	Not Found	Not Found	Not Found	High	Not Found	Not Found
	FALSE	High	[K].KMEDSVGCLETAEEVK.[R]	1xCarbamidomethyl [C8]; 1xOxidation [M2]; 2xTMT6plex [K1; K16]; 1xTMT6plex [N-Term]		FALSE	0.00027119	0.000146789	1	2	2	A0A024R1N1	A0A024R1N1 [1372-1387]	1	2528.32	0	1.554	1.222	1.385	2.113	1	1	1	1	107.9	158.6	69.5	75.1	104	84.9	16.11	35.34	4.72	9.27	15.6	51.03		High	Not Found	Not Found	Not Found	Not Found	Not Found	Not Found	Not Found	Not Found	Not Found	High	Not Found
	FALSE	High	[R].QAQQERDELADEIANSSGK.[G]	1xTMT6plex [N-Term]		FALSE	0.00043632	0.000146789	1	3	2	A0A024R1N1	A0A024R1N1 [1698-1716]	1	2318.14	0	1.036	1.125	0.531	0.565					94.5	84	91.2	148.7	78.9	102.6								Not Found	Not Found	Not Found	Not Found	Not Found	Not Found	High	Not Found	Not Found	Not Found	Not Found	Not Found
	FALSE	High	[R].LQQELDDLLVDLDHQR.[Q]			FALSE	0.000251626	0.000146789	1	2	2	A0A024R1N1	A0A024R1N1 [1418-1433]	0	1949.99	0																					No Quan Labels	Not Found	Not Found	Not Found	Not Found	Not Found	Not Found	Not Found	Not Found	High	Not Found	Not Found	Not Found
	FALSE	High	[R].QQQLTAMK.[V]	1xTMT6plex [K8]; 1xTMT6plex [N-Term]		FALSE	0.000447619	0.000146789	1	7	2	A0A024R1N1	A0A024R1N1 [803-810]	0	1405.82	0	1.949	1.914	2.163	1.523					99.3	114.5	51	75.1	162.5	97.6								Not Found	Not Found	Not Found	Not Found	Not Found	Not Found	Not Found	High	Not Found	Not Found	Not Found	Not Found
	FALSE	High	[K].DMFQETMEAMR.[I]			FALSE	0.000479232	0.000146789	1	3	2	A0A024R1N1	A0A024R1N1 [317-327]	0	1388.56	0																					No Quan Labels	Not Found	Not Found	Not Found	Not Found	Not Found	Not Found	Not Found	Not Found	Not Found	Not Found	Not Found	Not Found
	FALSE	High	[K].DMFQETMEAMR.[I]	1xOxidation [M]; 1xTMT6plex [N-Term]		FALSE	0.000305373	0.000146789	1	3	6	A0A024R1N1	A0A024R1N1 [317-327]	0	1633.72	0	0.86	0.806	1.495	2.703	1	1	1	0.55224	63.4	209.7	73.8	77.6	116	59.5	10.01	7.29	12.34	2.57	11.07	46.03		Not Found	Not Found	Not Found	Not Found	Not Found	Not Found	Not Found	Not Found	Not Found	Not Found	High	High
	FALSE	High	[K].TDLLLEPYNK.[Y]			FALSE	0.000241515	0.000146789	1	3	4	A0A024R1N1	A0A024R1N1 [290-299]	0	1205.64	0																					No Quan Labels	Not Found	Not Found	Not Found	Not Found	Not Found	Not Found	Not Found	Not Found	Not Found	Not Found	Not Found	Not Found
	FALSE	High	[R].TEMEDLMSSK.[D]	1xOxidation [M]; 1xTMT6plex [K10]; 1xTMT6plex [N-Term]		FALSE	0.000311591	0.000146789	1	4	9	A0A024R1N1	A0A024R1N1 [1504-1513]	0	1644.82	0	1.363	1.069	1.84	1.762	1	1	1	1	103.6	129.9	76	73.7	135.5	81.3	9.54	18.39	7.02	12.02	5.99	13.03		Not Found	High	High	Not Found	Not Found	Not Found	Not Found	Not Found	Not Found	High	High	Not Found
	FALSE	High	[R].TEMEDLMSSK.[D]	2xOxidation [M3; M7]; 1xTMT6plex [N-Term]		FALSE	0.000456992	0.000146789	1	4	2	A0A024R1N1	A0A024R1N1 [1504-1513]	0	1431.65	0	1.363	1.223	1.891	0.835					120.2	63.6	88.2	76.2	144	107.9								Not Found	Not Found	Not Found	Not Found	Not Found	High	Not Found	Not Found	Not Found	Not Found	Not Found	Not Found
	FALSE	High	[R].TEMEDLMSSK.[D]	2xOxidation [M3; M7]		FALSE	0.000228334	0.000146789	1	4	5	A0A024R1N1	A0A024R1N1 [1504-1513]	0	1202.49	0																					No Quan Labels	High	Not Found	Not Found	Not Found	Not Found	Not Found	Not Found	Not Found	Not Found	Not Found	Not Found	Not Found
	FALSE	High	[R].DLGEELEALK.[T]			FALSE	0.000479232	0.000146789	1	7	2	A0A024R1N1	A0A024R1N1 [1136-1145]	0	1116.58	0																					No Quan Labels	Not Found	Not Found	Not Found	Not Found	Not Found	Not Found	High	Not Found	Not Found	Not Found	Not Found	Not Found
	FALSE	High	[R].DLGEELEALK.[T]	1xTMT6plex [N-Term]		FALSE	0.000241515	0.000146789	1	7	2	A0A024R1N1	A0A024R1N1 [1136-1145]	0	1345.74	0	1.979	1.925	0.894	1.751					127.4	136.6	64.4	78	69.7	123.9								Not Found	Not Found	Not Found	Not Found	Not Found	Not Found	Not Found	Not Found	High	Not Found	Not Found	Not Found
	FALSE	High	[K].EEVGEEAIVELVENGK.[K]			FALSE	0.000263435	0.000146789	1	6	2	A0A024R1N1	A0A024R1N1 [48-63]	0	1743.86	0																					No Quan Labels	Not Found	Not Found	Not Found	Not Found	Not Found	High	Not Found	Not Found	Not Found	Not Found	Not Found	Not Found
	FALSE	High	[K].EEVGEEAIVELVENGK.[K]	1xTMT6plex [N-Term]		FALSE	0.000412996	0.000146789	1	6	2	A0A024R1N1	A0A024R1N1 [48-63]	0	1973.03	0	1.332	0.896	3.078	2.326					93.9	135.3	70.4	58.2	179.1	63.1								Not Found	Not Found	Not Found	Not Found	Not Found	Not Found	High	Not Found	Not Found	Not Found	Not Found	Not Found
	FALSE	High	[R].ALEEAMEQK.[A]	1xTMT6plex [N-Term]		FALSE	0.000315427	0.000146789	1	3	2	A0A024R1N1	A0A024R1N1 [1484-1492]	0	1277.66	0	1.638	1.361	3.099	2.287					107.1	121.3	65.4	53	164.3	88.9								Not Found	Not Found	Not Found	Not Found	Not Found	Not Found	Not Found	Not Found	High	Not Found	Not Found	Not Found
	FALSE	High	[K].VEDMAELTCLNEASVLHNLK.[ED]	1xCarbamidomethyl [C9]; 1xOxidation [M4]		FALSE	0.000349278	0.000146789	2	9	4	P35580; A0A024R1N1	P35580 [87-106]; A0A024R1N1 [83-102]	0	2302.11	0																					No Quan Labels	Not Found	Not Found	Not Found	Not Found	Not Found	Not Found	Not Found	Not Found	High	Not Found	High	Not Found
	FALSE	High	[K].VMQEQGTHPK.[F]	1xOxidation [M2]; 1xTMT6plex [N-Term]; 1xTMT6plex [K10]		FALSE	0.000347746	0.000146789	1	3	10	A0A024R1N1	A0A024R1N1 [546-555]	0	1399.72	0	1.905	1.579	2.565	1.374	1	1	1	1	124.8	85.2	65.5	62	159.1	103.4	9.77	26.08	7.85	17.54	7.22	9		Not Found	Not Found	Not Found	Not Found	Not Found	Not Found	High	High	High	Not Found	Not Found	High
	FALSE	High	[K].VMQEQGTHPK.[F]	1xTMT6plex [N-Term]; 1xTMT6plex [K10]		FALSE	0.000397263	0.000146789	1	3	6	A0A024R1N1	A0A024R1N1 [546-555]	0	1383.73	0	1.378	1.058	2.31	1.564	1	1	1	1	112.9	102.3	81.9	65.4	151	86.6	7.34	11.32	12.49	32.6	24.9	22.85		Not Found	Not Found	Not Found	Not Found	Not Found	Not Found	Not Found	High	Not Found	Not Found	High	High
	FALSE	High	[K].ASITALEAK.[I]			FALSE	0.000287951	0.000146789	1	3	2	A0A024R1N1	A0A024R1N1 [1807-1815]	0	903.515	0																					No Quan Labels	Not Found	Not Found	Not Found	Not Found	Not Found	Not Found	Not Found	Not Found	Not Found	Not Found	Not Found	Not Found
	FALSE	High	[K].RQAQQERDELADEIANSSGK.[G]	1xTMT6plex [N-Term]		FALSE	0.000324701	0.000146789	1	3	2	A0A024R1N1	A0A024R1N1 [1697-1716]	2	2474.24	0	1.126	0.936	1.522	3.176					83.7	207.6	74.3	65.4	99.5	69.6								Not Found	Not Found	Not Found	Not Found	Not Found	Not Found	Not Found	High	Not Found	Not Found	Not Found	Not Found
	FALSE	High	[K].SGFEPASLK.[E]			FALSE	0.000415033	0.000146789	1	6	4	A0A024R1N1	A0A024R1N1 [39-47]	0	935.483	0																					No Quan Labels	Not Found	Not Found	Not Found	Not Found	Not Found	Not Found	Not Found	Not Found	Not Found	Not Found	Not Found	Not Found
	FALSE	High	[R].FLSNGHVTIPGQQDK.[D]	1xTMT6plex [N-Term]		FALSE	0.000261556	0.000146789	1	3	4	A0A024R1N1	A0A024R1N1 [302-316]	0	1870	0	1.343	0.885	2.913	2.195	1	1	1	1	88.5	139.2	65.9	63.4	184.7	58.3	10.35	3.48	4.65	10.45	1.33	4.99		High	Not Found	Not Found	Not Found	Not Found	Not Found	Not Found	Not Found	Not Found	Not Found	Not Found	High
	FALSE	High	[K].ERNTDQASMPDNTAAQK.[V]			FALSE	0.000283594	0.000146789	1	7	6	A0A024R1N1	A0A024R1N1 [357-373]	1	1876.85	0																					No Quan Labels	Not Found	Not Found	Not Found	Not Found	Not Found	Not Found	Not Found	Not Found	Not Found	Not Found	Not Found	Not Found
	FALSE	High	[K].THEAQIQEMR.[Q]			FALSE	0.000630691	0.000151834	1	3	2	A0A024R1N1	A0A024R1N1 [1182-1191]	0	1242.59	0																					No Quan Labels	Not Found	Not Found	Not Found	Not Found	Not Found	Not Found	Not Found	Not Found	Not Found	Not Found	Not Found	Not Found
	FALSE	High	[R].QSACNLEK.[K]	1xCarbamidomethyl [C4]; 1xTMT6plex [K8]; 1xTMT6plex [N-Term]		FALSE	0.000687945	0.000151834	1	2	4	A0A024R1N1	A0A024R1N1 [1434-1441]	0	1407.77	1	1.781	1.3	1.734	1.969	1	1	1	1	117.9	138.2	66.2	70.2	121.7	86	4.28	7.26	16.14	5.75	3.28	6.61		High	High	Not Found	Not Found	Not Found	Not Found	Not Found	Not Found	Not Found	Not Found	Not Found	Not Found
	FALSE	High	[R].ALEEAMEQK.[A]			FALSE	0.000626862	0.000151834	1	3	2	A0A024R1N1	A0A024R1N1 [1484-1492]	0	1048.5	0																					No Quan Labels	Not Found	Not Found	Not Found	Not Found	Not Found	Not Found	Not Found	Not Found	Not Found	Not Found	Not Found	Not Found
	FALSE	High	[R].RGDLPFVVPR.[R]			FALSE	0.00074781	0.000151834	1	3	2	A0A024R1N1	A0A024R1N1 [1923-1932]	1	1155.66	0																					No Quan Labels	Not Found	Not Found	Not Found	Not Found	Not Found	Not Found	Not Found	Not Found	Not Found	Not Found	Not Found	Not Found
	FALSE	High	[R].TEMEDLMSSK.[D]	1xOxidation [M]		FALSE	0.000642378	0.000151834	1	4	6	A0A024R1N1	A0A024R1N1 [1504-1513]	0	1186.5	0																					No Quan Labels	High	High	High	Not Found	Not Found	Not Found	Not Found	Not Found	Not Found	Not Found	Not Found	Not Found
	FALSE	High	[R].TEMEDLMSSK.[D]	2xOxidation [M3; M7]; 1xTMT6plex [K10]; 1xTMT6plex [N-Term]		FALSE	0.000654374	0.000151834	1	4	3	A0A024R1N1	A0A024R1N1 [1504-1513]	0	1660.82	0	1.516	1.282	1.649	1.211	1	1	1	1	114.4	98.3	75.5	81.2	133.8	96.8	7.2	15.85	9.11	5.14	6.88	19.79		Not Found	Not Found	Not Found	Not Found	Not Found	Not Found	Not Found	High	Not Found	Not Found	Medium	Not Found
	FALSE	High	[K].DFSALESQLQDTQELLQEENRQK.[L]			FALSE	0.000670865	0.000151834	1	3	2	A0A024R1N1	A0A024R1N1 [1302-1324]	1	2749.33	0																					No Quan Labels	Not Found	Not Found	Not Found	Not Found	Not Found	Not Found	Not Found	Not Found	Not Found	Not Found	Not Found	Not Found
	FALSE	High	[R].GDLPFVVPR.[R]			FALSE	0.000626862	0.000151834	1	3	4	A0A024R1N1	A0A024R1N1 [1924-1932]	0	999.562	0																					No Quan Labels	Not Found	Not Found	Not Found	Not Found	Not Found	Not Found	Not Found	Not Found	Not Found	Not Found	Not Found	Not Found
	FALSE	High	[K].KVEAQLQELQVK.[F]	TMT6plex [K]; 1xTMT6plex [N-Term]		FALSE	0.000634553	0.000151834	1	3	9	A0A024R1N1	A0A024R1N1 [1249-1260]	1	1871.14	0	1.435	1.189	2.241	1.818	1	1	1	1	107.5	118.1	74.9	65	145.6	89	5.81	5.67	4.26	4.82	1.98	8.35		Not Found	Not Found	Not Found	Not Found	Not Found	High	High	Not Found	High	Not Found	Not Found	Not Found
	FALSE	High	[RK].KFDQLLAEEK.[NAST]	1xTMT6plex [N-Term]; 1xTMT6plex [K]		FALSE	0.00051441	0.000151834	3	14	9	P35580; A0A024R1N1; A1L2Z2	P35580 [1452-1461]; A0A024R1N1 [1445-1454]; A1L2Z2 [112-121]	1	1449.82	0	1.884	1.477	1.906	1.88	1	1	1	1	111.5	134.3	59.2	71.4	136.1	87.5	11.33	9.43	12.22	7.41	6.34	6.78	Shared	Not Found	Not Found	Not Found	High	High	Not Found	Not Found	Not Found	Not Found	Not Found	High	Not Found
	FALSE	High	[K].KMEDSVGCLETAEEVK.[R]	1xCarbamidomethyl [C8]; 1xOxidation [M2]; TMT6plex [K]; 1xTMT6plex [N-Term]		FALSE	0.000566579	0.000151834	1	2	1	A0A024R1N1	A0A024R1N1 [1372-1387]	1	2299.16	0	1.576	1.459	1.689	1.368					123.7	95.5	78.5	69.8	117.9	114.5								Not Found	Not Found	Not Found	Not Found	Not Found	Not Found	Not Found	Not Found	Not Found	High	Not Found	Not Found
	FALSE	High	[R].EDQSILCTGESGAGK.[T]	1xCarbamidomethyl [C7]; 1xTMT6plex [K15]; 1xTMT6plex [N-Term]		FALSE	0.000683619	0.000151834	2	12	2	P35580; A0A024R1N1	P35580 [170-184]; A0A024R1N1 [166-180]	0	2010.02	0	1.092	0.813	1.153	1.845					84.7	172.9	77.6	93.7	108	63							Shared	Not Found	Not Found	Not Found	Not Found	Not Found	Not Found	Not Found	Not Found	Not Found	High	Not Found	Not Found
	FALSE	High	[K].LQEMEGTVK.[S]	1xTMT6plex [N-Term]		FALSE	0.000511567	0.000151834	1	3	2	A0A024R1N1	A0A024R1N1 [1794-1802]	0	1263.68	0	1.827	1.246	2.656	1.528					126.7	93.6	69.3	61.3	162.7	86.4								Not Found	Not Found	Not Found	Not Found	Not Found	Not Found	Not Found	Not Found	Not Found	Not Found	Not Found	High
	FALSE	High	[R].QEEEMMAK.[E]	1xTMT6plex [K8]; 1xTMT6plex [N-Term]		FALSE	0.000626862	0.000151834	1	4	4	A0A024R1N1	A0A024R1N1 [843-850]	0	1453.74	0	1.978	1.3	2.532	2.681	1	1	1	1	129.9	137.7	65.7	51.3	130	85.4	28.55	4.39	26.89	59.79	4.56	16.42		Not Found	Not Found	Not Found	Not Found	Not Found	Not Found	Not Found	High	High	Not Found	Not Found	Not Found
	FALSE	High	[R].EMEAELEDERK.[Q]	1xTMT6plex [K11]; 1xTMT6plex [N-Term]		FALSE	0.000523082	0.000151834	1	3	2	A0A024R1N1	A0A024R1N1 [1593-1603]	1	1836.94	0	1.271	0.919	1.21	2.268					91.9	187.1	72.3	82.5	99.8	66.4								Not Found	Not Found	Not Found	Not Found	Not Found	Not Found	High	Not Found	Not Found	Not Found	Not Found	Not Found
	FALSE	High	[K].ADGAEAKPAE.[-]	1xTMT6plex [K7]; 1xTMT6plex [N-Term]		FALSE	0.000526022	0.000151834	1	3	5	A0A024R1N1	A0A024R1N1 [1951-1960]	0	1416.77	2	1.37	1.274	1.292	1.889	1	1	1	1	94.4	157.6	68.9	83.4	107.8	87.8	4.82	7.34	13.54	5.37	2.8	9.36		Not Found	Not Found	Not Found	Not Found	Not Found	Not Found	Not Found	High	High	Not Found	Not Found	Not Found
	FALSE	High	[K].ALELDSNLYR.[I]			FALSE	0.000837288	0.000163068	1	4	4	A0A024R1N1	A0A024R1N1 [746-755]	0	1193.62	0																					No Quan Labels	Not Found	Not Found	Not Found	Not Found	Not Found	Not Found	Not Found	Not Found	Not Found	High	Not Found	Not Found
	FALSE	High	[R].EEILAQAK.[E]	1xTMT6plex [K8]; 1xTMT6plex [N-Term]		FALSE	0.000890469	0.000163068	1	3	3	A0A024R1N1	A0A024R1N1 [1662-1669]	0	1359.82	0	1.494	1.173	1.645	1.241	1	1	1	1	109.9	105.5	73.5	85	139.8	86.3	2.32	14.88	18.23	6.44	10.98	11.78		Not Found	Not Found	Not Found	High	High	Not Found	Not Found	Not Found	Not Found	Not Found	Not Found	Not Found
	FALSE	High	[R].LEVNLQAMK.[A]	1xTMT6plex [K9]; 1xTMT6plex [N-Term]		FALSE	0.000854539	0.000163068	1	3	2	A0A024R1N1	A0A024R1N1 [1558-1566]	0	1503.9	0	1.069	0.818	1.269	1.171					94.8	117.1	88.7	100	126.9	72.5								Not Found	High	Not Found	Not Found	Not Found	Not Found	Not Found	Not Found	Not Found	Not Found	Not Found	Not Found
	FALSE	High	[K].GAGDGSDEEVDGKADGAEAKPAE.[-]	1xPhospho [S6]; 2xTMT6plex [K13; K20]; 1xTMT6plex [N-Term]	A0A024R1N1 1xPhospho [S1943]	FALSE	0.000848737	0.000163068	1	3	8	A0A024R1N1	A0A024R1N1 [1938-1960]	1	2942.39	0	5.735	5.535	0.369	0.459	0.638841	0.869058	1	1	228.4	27.9	39.8	60.9	22.5	220.4	7.72	11.54	8.68	8.29	0.58	2.73		Not Found	Not Found	Not Found	Not Found	Not Found	High	High	Not Found	Not Found	Not Found	Not Found	Not Found
	FALSE	High	[K].VKPLLQVSR.[Q]	1xTMT6plex [N-Term]; 1xTMT6plex [K2]		FALSE	0.000798793	0.000163068	1	4	4	A0A024R1N1	A0A024R1N1 [834-842]	0	1268.83	0	2.243	1.281	2.823	2.237					142.8	115.1	63.7	51.5	145.3	81.6								Not Found	Not Found	Not Found	Not Found	Not Found	Not Found	Not Found	Not Found	Not Found	Not Found	High	Not Found
	FALSE	High	[K].LVWVPSDK.[S]	1xTMT6plex [K8]; 1xTMT6plex [N-Term]		FALSE	0.000837288	0.000163068	1	6	2	A0A024R1N1	A0A024R1N1 [31-38]	0	1401.85	0	1.563	1.046	3.194	2.62					99.1	142.7	63.4	54.5	173.9	66.3								Not Found	Not Found	Not Found	Not Found	Not Found	Not Found	High	Not Found	Not Found	Not Found	Not Found	Not Found
	FALSE	High	[K].ASITALEAK.[I]	1xTMT6plex [K9]; 1xTMT6plex [N-Term]		FALSE	0.000809547	0.000163068	1	3	6	A0A024R1N1	A0A024R1N1 [1807-1815]	0	1132.68	1	1.587	1.299	2.698	1.466	1	1	1	1	124.4	83.8	78.4	57.2	154.3	101.9	1.86	9.68	12.6	3.84	4.03	2.99		Not Found	Not Found	High	High	Not Found	Not Found	Not Found	Not Found	Not Found	Not Found	High	Not Found
	FALSE	High	[K].SGFEPASLK.[E]	1xTMT6plex [N-Term]; 1xTMT6plex [K9]		FALSE	0.000848737	0.000163068	1	6	6	A0A024R1N1	A0A024R1N1 [39-47]	0	1164.65	0	1.581	1.485	2.023	1.263	1	1	1	1	125	82.1	79.1	65	131.5	117.4	4.16	19.42	37.06	2.74	12.63	0.86		Medium	High	High	Not Found	Medium	Not Found	Not Found	Not Found	Not Found	Not Found	Not Found	Not Found
	FALSE	High	[K].DVLLQVDDERR.[N]			FALSE	0.00083164	0.000163068	1	3	4	A0A024R1N1	A0A024R1N1 [1846-1856]	1	1357.71	0																					No Quan Labels	Not Found	Not Found	Not Found	Not Found	Not Found	Not Found	High	Not Found	Not Found	Not Found	Not Found	Not Found
	FALSE	High	[K].DVLLQVDDER.[R]			FALSE	0.000809547	0.000163068	1	3	2	A0A024R1N1	A0A024R1N1 [1846-1855]	0	1201.61	0																					No Quan Labels	Not Found	Not Found	Not Found	Not Found	Not Found	Not Found	Not Found	Not Found	Not Found	Not Found	Not Found	Not Found
	FALSE	High	[R].CIIPNHEK.[RK]	1xCarbamidomethyl [C1]; 1xTMT6plex [K8]; 1xTMT6plex [N-Term]		FALSE	0.000982279	0.000173014	2	8	4	P35580; A0A024R1N1	P35580 [678-685]; A0A024R1N1 [671-678]	0	1468.83	0	1.935	1.467	2.785	2.621	1	1	0.786261	0.906481	115.8	137.7	59.9	52.5	146.3	87.8	8.19	11.73	3.65	5.5	7.17	3.52	Shared	Not Found	Not Found	Not Found	Not Found	Not Found	Not Found	Not Found	Not Found	High	High	Not Found	Not Found
	FALSE	High	[K].RALEQQVEEMK.[T]	1xTMT6plex [N-Term]		FALSE	0.00103275	0.000173014	1	3	3	A0A024R1N1	A0A024R1N1 [1528-1538]	1	1589.85	0	1.32	0.875	2.611	2.378					105.3	137	79.8	57.6	150.4	69.9								Not Found	Not Found	Not Found	Not Found	Not Found	Not Found	Not Found	Not Found	Not Found	Not Found	High	Not Found
	FALSE	High	[R].GELANEVK.[V]	1xTMT6plex [K8]; 1xTMT6plex [N-Term]		FALSE	0.00102534	0.000173014	1	3	2	A0A024R1N1	A0A024R1N1 [1227-1234]	0	1317.78	0	1.816	1.399	1.576	1.311					119.4	108.9	65.7	83.1	131	91.9								Not Found	Not Found	Not Found	Not Found	Not Found	Not Found	Not Found	Not Found	Not Found	Not Found	Not Found	High
	FALSE	High	[R].FLSNGHVTIPGQQDK.[D]	1xTMT6plex [K15]; 1xTMT6plex [N-Term]		FALSE	0.00117825	0.000173014	1	3	2	A0A024R1N1	A0A024R1N1 [302-316]	0	2099.16	0	1.066	0.835	2.254	1.919					88.8	132.9	83.3	69.3	156.2	69.6								Not Found	Not Found	High	Not Found	Not Found	Not Found	Not Found	Not Found	Not Found	Not Found	Not Found	Not Found
	FALSE	High	[RK].KFDQLLAEEK.[NAST]	2xTMT6plex [K1; K10]; 1xTMT6plex [N-Term]		FALSE	0.000989294	0.000173014	3	14	3	P35580; A0A024R1N1; A1L2Z2	P35580 [1452-1461]; A0A024R1N1 [1445-1454]; A1L2Z2 [112-121]	1	1908.14	0	1.54	1.087	1.46	1.993					107.3	155.4	69.7	78	113.8	75.8							Shared	Not Found	Not Found	Not Found	Not Found	Not Found	Not Found	Not Found	Not Found	Not Found	Not Found	Not Found	High
	FALSE	High	[RK].KFDQLLAEEK.[NAST]	TMT6plex [K]; 1xTMT6plex [N-Term]		FALSE	0.00120489	0.000173014	3	14	6	P35580; A0A024R1N1; A1L2Z2	P35580 [1452-1461]; A0A024R1N1 [1445-1454]; A1L2Z2 [112-121]	1	1678.98	0	1.276	1.405	1.61	2.021	1	1	1	1	93.2	144.5	73	71.5	115.2	102.6	7.26	12.66	14.71	8.1	13.95	15.84	Shared	Not Found	Not Found	Not Found	Not Found	Not Found	High	Not Found	Not Found	Not Found	High	Medium	Not Found
	FALSE	High	[K].LQEMEGTVK.[S]			FALSE	0.00103275	0.000173014	1	3	2	A0A024R1N1	A0A024R1N1 [1794-1802]	0	1034.52	0																					No Quan Labels	Not Found	Not Found	Not Found	Not Found	Not Found	Not Found	Not Found	Not Found	Not Found	Not Found	Not Found	Not Found
	FALSE	High	[K].EEELQAALAR.[LAV]	1xTMT6plex [N-Term]		FALSE	0.00111065	0.000173014	1	10	2	A0A024R1N1	A0A024R1N1 [1082-1091]	0	1358.75	0	1.329	3.418	1.171	1.604					94.6	81.1	71.2	50.5	59.2	243.4								Not Found	Not Found	Not Found	Not Found	Not Found	Not Found	Not Found	Not Found	Not Found	High	Not Found	Not Found
	FALSE	High	[K].RQQQLTAMK.[V]	1xTMT6plex [K9]; 1xTMT6plex [N-Term]		FALSE	0.00133919	0.000184814	1	7	3	A0A024R1N1	A0A024R1N1 [802-810]	1	1561.92	0	1.529	1.089	1.437	1.607	1	1	1	1	137.2	109.4	89.7	68.1	97.9	97.7	11.68	71.23	39.28	49.19	41.69	43.32		Not Found	Not Found	Not Found	Not Found	Not Found	Not Found	Medium	High	Not Found	Not Found	Not Found	Not Found
	FALSE	High	[K].ADGAEAKPAE.[-]	1xTMT6plex [K7]; 1xTMT6plex [N-Term]		FALSE	0.00132902	0.000184814	1	3	14	A0A024R1N1	A0A024R1N1 [1951-1960]	0	1187.61	0	1.161	1.19	1.075	1.218	1	1	1	1	98.9	116.3	85.2	95.5	102.7	101.4	7.53	2.12	2.66	6.55	3.47	5.7		High	High	High	High	High	Not Found	Not Found	Not Found	Not Found	Not Found	Not Found	Not Found
	FALSE	High	[K].QELEEICHDLEAR.[V]	1xCarbamidomethyl [C7]; 1xTMT6plex [N-Term]		FALSE	0.00135979	0.000184814	1	3	2	A0A024R1N1	A0A024R1N1 [911-923]	0	1870.92	0																					No Quan Values	Not Found	Not Found	Not Found	Not Found	Not Found	Not Found	Not Found	High	Not Found	Not Found	Not Found	Not Found
	FALSE	High	[K].EEVGEEAIVELVENGKK.[V]	1xTMT6plex [N-Term]		FALSE	0.00144601	0.000198786	1	6	2	A0A024R1N1	A0A024R1N1 [48-64]	1	2101.12	0	1.419	0.866	1.892	1.853					109.5	135.3	77.2	73	138.1	66.8								Not Found	Not Found	Not Found	Not Found	Not Found	Not Found	Not Found	High	Not Found	Not Found	Not Found	Not Found
	FALSE	High	[R].VEEEAAQK.[N]	1xTMT6plex [N-Term]; 1xTMT6plex [K8]		FALSE	0.00156282	0.000214424	1	4	12	A0A024R1N1	A0A024R1N1 [1092-1099]	0	1132.6	0	1.324	1.357	2.101	0.751	1	1	0.787952	1	119.5	52.2	90.2	69.6	146.2	122.4	4.46	4.5	4.6	5.85	3.83	1.83		High	High	High	High	Not Found	Not Found	Not Found	Not Found	Not Found	Not Found	Not Found	Not Found
	FALSE	High	[K].QACVLMIK.[A]	1xCarbamidomethyl [C3]; 1xOxidation [M6]; 1xTMT6plex [K8]; 1xTMT6plex [N-Term]		FALSE	0.00161254	0.00022864	1	4	2	A0A024R1N1	A0A024R1N1 [738-745]	0	1436.84	0	2.268	1.591	1.854	1.269					155.2	82.3	68.4	64.9	120.3	108.9								Not Found	Not Found	Not Found	Not Found	Not Found	Not Found	Not Found	Not Found	Not Found	Not Found	Not Found	High
	FALSE	High	[R].AGVLAHLEEERDLK.[I]	1xTMT6plex [N-Term]		FALSE	0.00166406	0.00022864	2	5	4	P35580; A0A024R1N1	P35580 [772-785]; A0A024R1N1 [765-778]	1	1809.01	0	1.052	0.781	1.178	1.505					96.4	139	91.7	92.4	108.9	71.6							Shared	Not Found	Not Found	High	Not Found	Not Found	Not Found	Not Found	Not Found	Not Found	Not Found	Not Found	Not Found
	FALSE	High	[K].RALEQQVEEMK.[T]	1xTMT6plex [K11]; 1xTMT6plex [N-Term]		FALSE	0.00158746	0.00022864	1	3	4	A0A024R1N1	A0A024R1N1 [1528-1538]	1	1819.01	0	1.313	1.04	1.674	2.116	1	1	1	1	102.2	149.8	77.8	70.8	118.5	81	4.13	12.44	1.32	6.49	12.45	4.83		Not Found	High	High	Not Found	Not Found	Not Found	Not Found	Not Found	Not Found	Not Found	Not Found	Not Found
	FALSE	High	[R].DLQGRDEQSEEK.[K]	1xTMT6plex [K12]; 1xTMT6plex [N-Term]		FALSE	0.00173107	0.000242745	1	3	4	A0A024R1N1	A0A024R1N1 [1572-1583]	1	1891.98	0	0.39	0.479	0.832	2.595	1	1	1	1	35.9	250.9	92	96.7	80.4	44.1	4.06	12.64	17.26	3.59	2.05	27.12		Not Found	Not Found	Not Found	Not Found	Not Found	Not Found	Not Found	High	High	Not Found	Not Found	Not Found
	FALSE	High	[K].DLEGLSQRHEEK.[V]	1xTMT6plex [N-Term]; 1xTMT6plex [K12]		FALSE	0.00185938	0.00028858	1	2	4	A0A024R1N1	A0A024R1N1 [1393-1404]	1	1669.87	0	0.604	0.618	0.892	2.599	1	1	1	0.165707	50.8	239.1	84.1	92	82	52	11.24	3.94	2.93	16.58	2.69	0.88		Not Found	Not Found	Not Found	Not Found	Not Found	Not Found	Not Found	High	Not Found	High	Not Found	Not Found
	FALSE	High	[K].ADEWLMK.[N]	1xTMT6plex [K7]; 1xTMT6plex [N-Term]		FALSE	0.00213109	0.000298236	2	5	4	P35580; A0A024R1N1	P35580 [588-594]; A0A024R1N1 [581-587]	0	1350.75	0	1.778	0.888	3.591	3.155	1	1	1	1	113.7	148.9	64	47.2	169.4	56.8	9.26	18	6.72	7.09	11.98	8.55	Shared	Not Found	Not Found	Not Found	Not Found	Not Found	Not Found	Not Found	High	High	Not Found	Not Found	Not Found
	FALSE	High	[RK].KFDQLLAEEK.[NAST]			FALSE	0.00214836	0.000298236	3	14	2	P35580; A0A024R1N1; A1L2Z2	P35580 [1452-1461]; A0A024R1N1 [1445-1454]; A1L2Z2 [112-121]	1	1220.65	0																					No Quan Labels	Not Found	Not Found	Not Found	Not Found	Not Found	Not Found	Not Found	Not Found	Not Found	Not Found	Not Found	Not Found
	FALSE	High	[K].THEAQIQEMR.[Q]	1xOxidation [M9]		FALSE	0.00206351	0.000298236	1	3	3	A0A024R1N1	A0A024R1N1 [1182-1191]	0	1258.58	0																					No Quan Labels	Not Found	Not Found	Not Found	Not Found	Not Found	Not Found	Not Found	Not Found	Not Found	Not Found	Not Found	Not Found
	FALSE	High	[K].DMFQETMEAMR.[I]	2xOxidation [M2; M10]		FALSE	0.00195073	0.000298236	1	3	1	A0A024R1N1	A0A024R1N1 [317-327]	0	1420.55	0																					No Quan Labels	Not Found	Not Found	Not Found	Not Found	Not Found	High	Not Found	Not Found	Not Found	Not Found	Not Found	Not Found
	FALSE	High	[K].NMDPLNDNIATLLHQSSDK.[F]	1xOxidation [M2]		FALSE	0.00193517	0.000298236	1	4	4	A0A024R1N1	A0A024R1N1 [588-606]	0	2142.01	0																					No Quan Labels	High	High	Not Found	Not Found	Not Found	Not Found	Not Found	Not Found	Not Found	Not Found	Not Found	High
	FALSE	High	[R].QEEEMMAK.[E]	1xOxidation [M6]; 1xTMT6plex [K8]; 1xTMT6plex [N-Term]		FALSE	0.00231059	0.000308191	1	4	2	A0A024R1N1	A0A024R1N1 [843-850]	0	1469.74	0	1.492	1.095	2.695	2.256					102.2	134.3	68.5	59.5	160.5	75								Not Found	Not Found	Not Found	Not Found	Not Found	Not Found	Not Found	High	Not Found	Not Found	Not Found	Not Found
	FALSE	High	[K].TLEEEAK.[T]	1xTMT6plex [K7]; 1xTMT6plex [N-Term]		FALSE	0.00244562	0.000308191	1	3	4	A0A024R1N1	A0A024R1N1 [1175-1181]	0	1277.74	0	1.652	1.401	1.755	1.513	1	1	1	1	121.2	107.3	73.3	70.9	124.5	102.7	4.41	13.52	20.33	9.79	11.31	1.3		Not Found	Not Found	Not Found	Not Found	Not Found	Not Found	Not Found	Not Found	High	High	Not Found	Not Found
	FALSE	High	[R].ALEEAMEQK.[A]	1xOxidation [M6]; 1xTMT6plex [N-Term]		FALSE	0.0026744	0.00031951	1	3	4	A0A024R1N1	A0A024R1N1 [1484-1492]	0	1293.66	0	1.122	1.115	1.999	1.095	1	1	1	1	113.6	72.8	101.3	66.5	132.9	113	3.82	61.49	39.57	13.46	19.75	18.54		Not Found	Not Found	Not Found	Not Found	Not Found	Not Found	Not Found	High	High	Not Found	Not Found	Not Found
	FALSE	High	[K].QIATLHAQVADMK.[K]	1xOxidation [M12]; 1xTMT6plex [N-Term]		FALSE	0.00269624	0.000332126	1	3	2	A0A024R1N1	A0A024R1N1 [1358-1370]	0	1670.91	0	1.328	1.266	1.947	1.002					113	74.7	85.1	74.5	145	107.7								Not Found	Not Found	Not Found	Not Found	High	Not Found	Not Found	Not Found	Not Found	Not Found	Not Found	Not Found
	FALSE	High	[K].SMEAEMIQLQEELAAAER.[A]	2xOxidation [M2; M6]; 1xTMT6plex [N-Term]		FALSE	0.00285423	0.000359713	1	3	2	A0A024R1N1	A0A024R1N1 [1677-1694]	0	2310.12	0	0.786	0.769	0.932	1.262					87.4	124.8	111.2	98.9	92.2	85.5								Not Found	Not Found	Not Found	Not Found	Not Found	Not Found	High	Not Found	Not Found	Not Found	Not Found	Not Found
	FALSE	High	[R].ASREEILAQAK.[E]	1xTMT6plex [N-Term]; 1xTMT6plex [K11]		FALSE	0.00375779	0.000461636	1	3	6	A0A024R1N1	A0A024R1N1 [1659-1669]	1	1444.83	0	1.619	1.417	1.221	1.209	1	1	1	1	116.4	109.2	71.9	90.3	110.3	101.9	7.28	7.32	19.05	51.79	45.24	4.96		Not Found	Not Found	Not Found	Not Found	Not Found	Not Found	Not Found	Not Found	High	High	High	Not Found
	FALSE	High	[K].DLEGLSQR.[H]	1xTMT6plex [N-Term]		FALSE	0.00391108	0.000472911	1	2	4	A0A024R1N1	A0A024R1N1 [1393-1400]	0	1146.63	0	0.879	0.765	0.808	1.5	1	1	1	1	76.1	168.3	86.5	112.2	90.7	66.2	12.33	24.04	30.67	3.89	5.26	7.07		Not Found	Not Found	Not Found	Not Found	Not Found	Not Found	Not Found	Not Found	Not Found	Not Found	High	High
	FALSE	High	[K].KLEEEQIILEDQNCK.[L]	1xCarbamidomethyl [C14]; TMT6plex [K]; 1xTMT6plex [N-Term]		FALSE	0.00530134	0.000753967	1	4	9	A0A024R1N1	A0A024R1N1 [975-989]	1	2347.26	0	0.971	1.023	1.195	1.296	1	1	1	1	94.8	114.2	97.6	88.2	105.3	99.9	14.07	24.6	7.15	7.68	21.81	24.28		Not Found	Not Found	Not Found	Not Found	Not Found	Not Found	Not Found	Not Found	High	Not Found	Not Found	High
	FALSE	High	[K].KLVWVPSDK.[S]	2xTMT6plex [K1; K9]; 1xTMT6plex [N-Term]		FALSE	0.00542322	0.00077844	1	6	1	A0A024R1N1	A0A024R1N1 [30-38]	1	1759.11	0	4.836	3.111	1.335	1.989					221.4	87.6	45.8	44	58.8	142.4								Not Found	Not Found	Not Found	Not Found	Not Found	Not Found	Not Found	Not Found	Not Found	Not Found	Not Found	High
	FALSE	High	[K].KVEAQLQELQVK.[F]	1xTMT6plex [N-Term]; 1xTMT6plex [K1]		FALSE	0.00597772	0.000807689	1	3	4	A0A024R1N1	A0A024R1N1 [1249-1260]	1	1641.97	0	1.229	0.99	2.401	1.999					100.4	124.8	81.7	62.4	149.9	80.8								Not Found	High	Not Found	Not Found	Not Found	Not Found	Not Found	Not Found	Not Found	Not Found	Not Found	Not Found
	FALSE	High	[K].LQEMEGTVK.[S]	1xOxidation [M4]; 1xTMT6plex [N-Term]; 1xTMT6plex [K9]		FALSE	0.00711931	0.00103494	1	3	7	A0A024R1N1	A0A024R1N1 [1794-1802]	0	1279.68	0	1.418	1.301	1.7	0.874	1	1	1	1	118.3	70.8	83.4	81.1	137.8	108.5	14.75	11.23	7.57	20.54	8.2	6.56		Not Found	Not Found	Not Found	Not Found	Not Found	Not Found	High	Not Found	Medium	High	Not Found	High
	FALSE	High	[K].VKPLLQVSR.[Q]	1xTMT6plex [K2]; 1xTMT6plex [N-Term]		FALSE	0.00732533	0.00109564	1	4	2	A0A024R1N1	A0A024R1N1 [834-842]	0	1497.99	0	2.08	1.351	1.958	2.185					126.2	140.7	60.6	64.4	126.1	81.9								Not Found	Not Found	Not Found	Not Found	Not Found	Not Found	Not Found	Not Found	Not Found	Not Found	High	Not Found
	FALSE	High	[R].CQHLQAEK.[K]	1xCarbamidomethyl [C1]; 1xTMT6plex [N-Term]		FALSE	0.00753613	0.0011177	1	3	2	A0A024R1N1	A0A024R1N1 [931-938]	0	1242.65	0	1.406	1.419	4.337	3.007					80.2	137.6	57	45.8	198.5	81								Not Found	Not Found	Not Found	Not Found	Not Found	Not Found	Not Found	Not Found	Not Found	High	Not Found	Not Found
	FALSE	High	[K].ADEWLMK.[N]			FALSE	0.00758958	0.00114202	2	5	2	P35580; A0A024R1N1	P35580 [588-594]; A0A024R1N1 [581-587]	0	892.423	0																					No Quan Labels	Not Found	Not Found	Not Found	Not Found	Not Found	Not Found	Not Found	High	Not Found	Not Found	Not Found	Not Found
	FALSE	High	[K].RALEQQVEEMK.[T]			FALSE	0.0079168	0.00118447	1	3	2	A0A024R1N1	A0A024R1N1 [1528-1538]	1	1360.69	0																					No Quan Labels	Not Found	Not Found	Not Found	Not Found	Not Found	High	Not Found	Not Found	Not Found	Not Found	Not Found	Not Found
	FALSE	High	[K].GALALEEK.[R]			FALSE	0.0080284	0.00119604	1	3	2	A0A024R1N1	A0A024R1N1 [1717-1724]	0	830.462	0																					No Quan Labels	Not Found	Not Found	Not Found	Not Found	Not Found	Not Found	Not Found	Not Found	Not Found	Not Found	Not Found	Not Found
	FALSE	High	[R].GDLPFVVPR.[R]	1xTMT6plex [N-Term]		FALSE	0.00819819	0.00124261	1	3	4	A0A024R1N1	A0A024R1N1 [1924-1932]	0	1228.73	0	1.604	1.09	3.489	2.423	1	1	1	1	110.7	121	69	49.9	174.2	75.3	2.92	5.15	2.25	11.94	0.47	15.01		Not Found	Not Found	Not Found	Not Found	Not Found	Not Found	Not Found	Not Found	High	High	Not Found	Not Found
	FALSE	High	[K].LQEMEGTVK.[S]	1xOxidation [M4]; 1xTMT6plex [K9]; 1xTMT6plex [N-Term]		FALSE	0.00848774	0.00126084	1	3	3	A0A024R1N1	A0A024R1N1 [1794-1802]	0	1508.84	0	1.62	1.422	2.046	1.47	1	1	1	1	120.5	97.5	74.4	66.3	135.6	105.8	1.96	24.93	0.84	19.02	11.39	23.96		High	Not Found	Not Found	Not Found	High	Not Found	Not Found	Not Found	Not Found	Not Found	Not Found	Not Found
	FALSE	High	[R].TEMEDLMSSK.[D]	1xOxidation [M7]; 1xTMT6plex [N-Term]		FALSE	0.00884632	0.00132809	1	4	2	A0A024R1N1	A0A024R1N1 [1504-1513]	0	1415.66	0	1.321	1.089	2.599	1.464					114.4	88.1	86.6	60.2	156.4	94.3								Not Found	Not Found	Not Found	Not Found	Not Found	Not Found	Not Found	High	Not Found	Not Found	Not Found	Not Found
	FALSE	High	[R].SMAVAAR.[K]	1xTMT6plex [N-Term]		FALSE	0.00890729	0.00132809	1	3	3	A0A024R1N1	A0A024R1N1 [1606-1612]	0	934.534	0	1.663	1.165	2.54	2.079	1	1	1	1	121.8	118.3	73.2	56.9	144.5	85.3	0.58	7.93	6.22	4.09	6.56	9.02		Not Found	High	High	Not Found	Not Found	Not Found	Not Found	Not Found	Not Found	Not Found	Not Found	Not Found
	FALSE	High	[R].RNAEQYK.[D]	1xTMT6plex [K7]; 1xTMT6plex [N-Term]		FALSE	0.00909235	0.00138459	1	3	2	A0A024R1N1	A0A024R1N1 [1856-1862]	1	1366.78	0	1.381	1.031	1.473	1.662					110	131.9	79.6	79.4	116.9	82.1								Not Found	High	Not Found	Not Found	Not Found	Not Found	Not Found	Not Found	Not Found	Not Found	Not Found	Not Found
	FALSE	High	[R].IMGIPEEEQMGLLR.[V]	2xOxidation [M2; M10]		FALSE	0.00953695	0.00148146	1	3	2	A0A024R1N1	A0A024R1N1 [328-341]	0	1647.81	0																					No Quan Labels	Not Found	Not Found	Not Found	Not Found	Not Found	Not Found	Not Found	Not Found	Not Found	Not Found	Not Found	Not Found
	FALSE	High	[K].KMEDSVGCLETAEEVK.[R]	1xCarbamidomethyl [C8]; 1xTMT6plex [N-Term]; 1xTMT6plex [K1]		FALSE	0.0101365	0.00151696	1	2	4	A0A024R1N1	A0A024R1N1 [1372-1387]	1	2054	0	0.359	0.317	0.388	0.265					90.7	28.3	252.8	106.6	41.4	80.2								Not Found	Not Found	Not Found	Not Found	Not Found	Not Found	Not Found	High	Not Found	Not Found	Not Found	Not Found
	FALSE	High	[R].EEILAQAK.[E]	1xTMT6plex [N-Term]		FALSE	0.0106976	0.00159283	1	3	4	A0A024R1N1	A0A024R1N1 [1662-1669]	0	1130.66	0	1.343	1.232	1.732	1.084	1	1	1	1	107.1	89.4	79.8	82.5	142.8	98.3	9.92	15.9	5.05	22.16	15.97	3.29		Not Found	Not Found	Not Found	Not Found	Not Found	Not Found	Not Found	Not Found	Not Found	Not Found	High	High
	FALSE	High	[K].QTLENERGELANEVK.[V]			FALSE	0.0109888	0.00167052	1	3	4	A0A024R1N1	A0A024R1N1 [1220-1234]	1	1729.87	0																					No Quan Labels	Not Found	Not Found	Not Found	Not Found	High	High	Not Found	Not Found	Not Found	Not Found	Not Found	Not Found
	FALSE	High	[R].SMMQDREDQSILCTGESGAGK.[T]	1xCarbamidomethyl [C13]; 2xOxidation [M2; M3]		FALSE	0.0117502	0.00177698	1	4	2	A0A024R1N1	A0A024R1N1 [160-180]	1	2331.98	0																					No Quan Labels	Not Found	Not Found	Not Found	Not Found	Not Found	High	Not Found	Not Found	Not Found	Not Found	Not Found	Not Found
	FALSE	High	[R].TVGQLYK.[E]	1xTMT6plex [K7]; 1xTMT6plex [N-Term]		FALSE	0.0144659	0.00212677	2	11	4	P35580; A0A024R1N1	P35580 [652-658]; A0A024R1N1 [645-651]	0	1266.78	0	1.389	1.253	1.139	0.966	1	1	1	1	108	98.6	77.8	102	116.2	97.5	28.01	22.31	21.47	33.67	3.11	4.6	Shared	High	Not Found	Not Found	Not Found	Not Found	Not Found	Not Found	Not Found	Not Found	Not Found	Not Found	High
	FALSE	High	[R].ASREEILAQAK.[E]			FALSE	0.0162363	0.00229239	1	3	4	A0A024R1N1	A0A024R1N1 [1659-1669]	1	1215.67	0																					No Quan Labels	Not Found	Not Found	Not Found	Not Found	Not Found	Medium	High	Not Found	Not Found	Not Found	Not Found	Not Found
	FALSE	High	[R].VRTELADK.[V]	1xTMT6plex [K8]; 1xTMT6plex [N-Term]		FALSE	0.0170329	0.00237913	1	3	2	A0A024R1N1	A0A024R1N1 [1267-1274]	1	1389.85	0	1.3	1.13	1.38	1.871					97.3	151	74.9	80.7	111.4	84.6								Not Found	Not Found	Not Found	Not Found	High	Not Found	Not Found	Not Found	Not Found	Not Found	Not Found	Not Found
	FALSE	High	[R].ALEEAMEQK.[A]	1xOxidation [M6]		FALSE	0.0173872	0.00247313	1	3	2	A0A024R1N1	A0A024R1N1 [1484-1492]	0	1064.49	0																					No Quan Labels	Not Found	Not Found	Not Found	Not Found	Not Found	Not Found	Not Found	Not Found	Not Found	Not Found	Not Found	Not Found
	FALSE	High	[R].YEILTPNSIPK.[G]			FALSE	0.017507	0.00249259	1	4	2	A0A024R1N1	A0A024R1N1 [721-731]	0	1274.7	0																					No Quan Labels	Not Found	Not Found	Not Found	Not Found	Not Found	Not Found	Not Found	Not Found	Not Found	High	Not Found	Not Found
	FALSE	High	[R].QRYEILTPNSIPK.[G]			FALSE	0.0176278	0.00250134	1	4	4	A0A024R1N1	A0A024R1N1 [719-731]	1	1558.86	0																					No Quan Labels	Not Found	Not Found	Not Found	Not Found	Not Found	Not Found	Not Found	Not Found	Not Found	High	Not Found	Not Found
	FALSE	High	[R].IIGLDQVAGMSETALPGAFK.[T]	1xOxidation [M10]; 1xTMT6plex [K20]		FALSE	0.0186263	0.00267985	1	4	2	A0A024R1N1	A0A024R1N1 [618-637]	0	2263.22	0	2.419	1.845	2.605	1.279					156.6	67.9	64.7	53.1	138.2	119.5								Not Found	Not Found	Not Found	Not Found	Not Found	Not Found	Not Found	Not Found	High	Not Found	Not Found	Not Found
	FALSE	High	[K].DQGELER.[Q]	1xTMT6plex [N-Term]		FALSE	0.0191479	0.00273473	1	4	4	A0A024R1N1	A0A024R1N1 [203-209]	0	1075.56	0	0.412	0.462	0.687	1.739	1	1	1	1	39.7	212.9	96.4	122.4	84.1	44.5	7.31	3.36	5.31	7.86	12.28	12.67		Not Found	Not Found	Not Found	Not Found	High	High	Not Found	Not Found	Not Found	Not Found	Not Found	Not Found
	FALSE	High	[K].QIATLHAQVADMK.[K]	1xOxidation [M12]; 1xTMT6plex [K13]; 1xTMT6plex [N-Term]		FALSE	0.0191479	0.00273473	1	3	4	A0A024R1N1	A0A024R1N1 [1358-1370]	0	1900.07	0	1.282	0.838	2.294	1.985	1	1	1	1	96.6	137.2	75.4	69.1	158.5	63.2	37.11	42.01	15.9	1.17	8.94	37.44		Not Found	Not Found	Not Found	Not Found	Not Found	Not Found	Not Found	Not Found	High	Not Found	High	Not Found
	FALSE	High	[K].ADEWLMK.[N]	1xOxidation [M6]; 1xTMT6plex [K7]; 1xTMT6plex [N-Term]		FALSE	0.0192807	0.00275387	2	5	2	P35580; A0A024R1N1	P35580 [588-594]; A0A024R1N1 [581-587]	0	1366.74	0	2.065	1.671	2.208	1.527					130.2	97.2	63.1	63.6	140.5	105.4							Shared	Not Found	Not Found	Not Found	Not Found	Not Found	Not Found	High	Not Found	Not Found	Not Found	Not Found	Not Found
	FALSE	High	[K].VMQEQGTHPK.[F]			FALSE	0.0194145	0.00276232	1	3	2	A0A024R1N1	A0A024R1N1 [546-555]	0	1154.56	0																					No Quan Labels	Not Found	Not Found	Not Found	Not Found	High	Not Found	Not Found	Not Found	Not Found	Not Found	Not Found	Not Found
	FALSE	High	[K].VEAQLQELQVK.[F]	1xTMT6plex [N-Term]		FALSE	0.019685	0.00280071	1	3	2	A0A024R1N1	A0A024R1N1 [1250-1260]	0	1513.88	0	0.858	0.987	1.586	1.024					93.8	82	109.2	80.1	127.1	107.8								Not Found	Not Found	High	Not Found	Not Found	Not Found	Not Found	Not Found	Not Found	Not Found	Not Found	Not Found
	FALSE	High	[K].KLEMDLK.[D]	2xTMT6plex [K1; K7]; 1xTMT6plex [N-Term]		FALSE	0.0208091	0.00303871	1	3	1	A0A024R1N1	A0A024R1N1 [1614-1620]	1	1563.97	0	1.66	1.054	1.932	2.926					106.5	180.7	64.2	61.7	119.3	67.6								High	Not Found	Not Found	Not Found	Not Found	Not Found	Not Found	Not Found	Not Found	Not Found	Not Found	Not Found
	FALSE	High	[K].LVWVPSDK.[S]	1xTMT6plex [N-Term]		FALSE	0.0208091	0.00303871	1	6	4	A0A024R1N1	A0A024R1N1 [31-38]	0	1172.69	0	1.185	0.913	2.409	1.384	1	1	1	1	101.4	96.7	85.6	69.9	168.3	78.1	7.85	14.03	1.6	4.63	3.93	9.79		Not Found	Not Found	High	High	Not Found	Not Found	Not Found	Not Found	Not Found	Not Found	Not Found	Not Found
	FALSE	High	[R].QSACNLEK.[K]	1xCarbamidomethyl [C4]; 1xTMT6plex [N-Term]		FALSE	0.0211012	0.00308677	1	2	2	A0A024R1N1	A0A024R1N1 [1434-1441]	0	1178.6	0	1.034	0.796	2.209	1.337					107.6	89.9	104	67.2	148.4	82.8								Not Found	Not Found	Not Found	Not Found	Not Found	Not Found	Not Found	Not Found	High	Not Found	Not Found	Not Found
	FALSE	High	[K].DLEGLSQR.[H]			FALSE	0.0211012	0.00308677	1	2	2	A0A024R1N1	A0A024R1N1 [1393-1400]	0	917.469	0																					No Quan Labels	Not Found	Not Found	Not Found	Not Found	Not Found	High	Not Found	Not Found	Not Found	Not Found	Not Found	Not Found
	FALSE	High	[K].QACVLMIK.[A]	1xCarbamidomethyl [C3]; 1xOxidation [M6]; 1xTMT6plex [N-Term]		FALSE	0.0218521	0.00320244	1	4	2	A0A024R1N1	A0A024R1N1 [738-745]	0	1207.67	0	1.745	1.405	2.276	1.062					143.9	63.1	82.4	59.4	135.2	115.9								Not Found	Not Found	Not Found	Not Found	High	Not Found	Not Found	Not Found	Not Found	Not Found	Not Found	Not Found
	FALSE	High	[K].RQAQQERDELADEIANSSGK.[G]	1xTMT6plex [K20]; 1xTMT6plex [N-Term]		FALSE	0.0221611	0.00321782	1	3	4	A0A024R1N1	A0A024R1N1 [1697-1716]	2	2703.41	0	1.115	1.196	0.782	2.024	1	1	1	1	82.8	188.4	74.3	93.1	72.8	88.8	11.83	31.72	27.39	26.65	2.87	3.84		Not Found	Not Found	Not Found	Not Found	Not Found	Not Found	Not Found	Not Found	High	High	Not Found	Not Found
	FALSE	High	[K].GALALEEK.[R]	1xTMT6plex [K8]; 1xTMT6plex [N-Term]		FALSE	0.0224753	0.00328738	1	3	4	A0A024R1N1	A0A024R1N1 [1717-1724]	0	1059.62	0	1.983	1.418	2.402	1.54	1	1	1	1	135.6	93.2	68.4	60.5	145.3	97	4.2	8.29	1.56	15.05	7.9	12.49		Not Found	Not Found	Not Found	Not Found	Not Found	Not Found	Not Found	Not Found	High	Not Found	Not Found	High
	FALSE	High	[K].DMFQETMEAMR.[I]	2xOxidation [M]; 1xTMT6plex [N-Term]		FALSE	0.0239566	0.00349499	1	3	4	A0A024R1N1	A0A024R1N1 [317-327]	0	1649.72	0	0.771	0.618	1.39	2.494	1	1	1	1	60.3	211	78.2	84.6	117.6	48.3	27.33	19.01	5.49	8.61	3.97	21.82		Not Found	Not Found	Not Found	Not Found	Not Found	Not Found	Not Found	Medium	Not Found	Not Found	High	High
	FALSE	High	[R].QRYEILTPNSIPK.[G]	1xTMT6plex [N-Term]		FALSE	0.0241284	0.0035128	1	4	4	A0A024R1N1	A0A024R1N1 [719-731]	1	1788.02	0	1.217	0.856	3.29	2.125	1	1	0.129654	0.519959	103.3	112.4	84.9	52.9	173.9	72.6	7.99	13.12	3.21	0.79	3.5	3.73		Not Found	Not Found	Not Found	High	High	Not Found	Not Found	Not Found	Not Found	Not Found	Not Found	Not Found
	FALSE	High	[K].QACVLMIK.[A]	1xCarbamidomethyl [C3]		FALSE	0.0248311	0.00359135	1	4	2	A0A024R1N1	A0A024R1N1 [738-745]	0	962.516	0																					No Quan Labels	Not Found	Not Found	Not Found	Not Found	Not Found	Not Found	Not Found	Not Found	Not Found	High	Not Found	Not Found
	FALSE	High	[R].VVFQEFR.[Q]			FALSE	0.0251921	0.00361634	1	4	4	A0A024R1N1	A0A024R1N1 [712-718]	0	924.494	0																					No Quan Labels	Not Found	Not Found	Not Found	Not Found	Not Found	Not Found	Not Found	Not Found	Not Found	Not Found	High	Not Found
	FALSE	High	[K].QLAAENR.[L]	1xTMT6plex [N-Term]		FALSE	0.0259339	0.0036546	1	4	2	A0A024R1N1	A0A024R1N1 [861-867]	0	1030.58	0	1.455	1.318	1.675	1.843					94.2	145.1	64.8	78.7	131.9	85.3								Not Found	Not Found	Not Found	Not Found	Not Found	Not Found	Not Found	Not Found	Not Found	High	Not Found	Not Found
	FALSE	High	[R].LTEMETLQSQLMAEK.[L]	1xOxidation [M12]		FALSE	0.0268999	0.00367075	1	4	2	A0A024R1N1	A0A024R1N1 [868-882]	0	1767.85	0																					No Quan Labels	Not Found	Not Found	Not Found	Not Found	Not Found	Not Found	Not Found	Not Found	High	Not Found	Not Found	Not Found
	FALSE	High	[R].NTNPNFVR.[C]	1xTMT6plex [N-Term]		FALSE	0.0324562	0.00423757	2	5	4	P35580; A0A024R1N1	P35580 [670-677]; A0A024R1N1 [663-670]	0	1190.65	0	1.746	1.167	1.898	1.605	1	1	1	1	125.8	113.4	72	70.6	134.1	84.1	1.5	1.23	0.1	0.35	2.23	0.14	Shared	High	Not Found	Not Found	Not Found	Not Found	Not Found	Not Found	Not Found	Not Found	Not Found	Not Found	High
	FALSE	High	[R].EMEAELEDERK.[Q]	1xOxidation [M2]; 1xTMT6plex [K11]; 1xTMT6plex [N-Term]		FALSE	0.0345252	0.00439977	1	3	4	A0A024R1N1	A0A024R1N1 [1593-1603]	1	1852.94	0	1.046	0.934	1.07	1.631	1	1	1	1	84.5	158.3	80.8	97.1	103.9	75.5	6.5	11.22	3.3	2.67	11.04	8.04		Not Found	Not Found	Not Found	Not Found	Not Found	High	High	Not Found	Not Found	Not Found	Not Found	Not Found
	FALSE	High	[K].ADEWLMK.[N]	1xOxidation [M6]		FALSE	0.0350669	0.00445276	2	5	2	P35580; A0A024R1N1	P35580 [588-594]; A0A024R1N1 [581-587]	0	908.418	0																					No Quan Labels	Not Found	Not Found	Not Found	Not Found	Not Found	Not Found	Not Found	Not Found	Not Found	Not Found	Not Found	Not Found
	FALSE	High	[K].TLEEEAK.[T]	1xTMT6plex [N-Term]; 1xTMT6plex [K7]		FALSE	0.0356186	0.00454632	1	3	8	A0A024R1N1	A0A024R1N1 [1175-1181]	0	1048.57	0	1.682	1.601	2.074	1.512	1	1	1	1	114.3	101.9	67.9	67.4	139.8	108.8	6.02	5.79	6.06	22.56	14.9	10.97		Not Found	Not Found	High	High	High	Not Found	High	Not Found	Not Found	Not Found	Not Found	Not Found
	FALSE	High	[K].DCMRELDDTR.[A]	1xCarbamidomethyl [C2]; 1xTMT6plex [N-Term]		FALSE	0.0388393	0.00486232	1	3	2	A0A024R1N1	A0A024R1N1 [1649-1658]	1	1539.71	0	0.528	0.555	0.921	2.613					55.2	220.1	104.7	84.2	77.6	58.1								Not Found	Not Found	Not Found	Not Found	Not Found	Not Found	Not Found	High	Not Found	Not Found	Not Found	Not Found
	FALSE	High	[K].KLEMDLK.[D]	1xOxidation [M4]; 2xTMT6plex [K1; K7]; 1xTMT6plex [N-Term]		FALSE	0.0407344	0.00496671	1	3	1	A0A024R1N1	A0A024R1N1 [1614-1620]	1	1579.97	0	1.411	1.158	1.934	2.605					96.6	167.3	68.4	64.2	124.2	79.2								High	Not Found	Not Found	Not Found	Not Found	Not Found	Not Found	Not Found	Not Found	Not Found	Not Found	Not Found
	FALSE	High	[K].NRDEAIK.[Q]	1xTMT6plex [K7]; 1xTMT6plex [N-Term]		FALSE	0.0448358	0.00529355	1	3	4	A0A024R1N1	A0A024R1N1 [1632-1638]	1	1303.77	0	1.188	0.829	1.254	2.316	1	1	1	1	84.3	195.6	71	84.4	105.8	58.9	30.94	15.18	5.52	13.75	13.46	5.85		Not Found	Not Found	Not Found	Not Found	Not Found	Not Found	Not Found	Not Found	Not Found	Not Found	High	High
	FALSE	High	[K].RQQQLTAMK.[V]	1xOxidation [M8]; 1xTMT6plex [K9]; 1xTMT6plex [N-Term]		FALSE	0.0509909	0.00597154	1	7	1	A0A024R1N1	A0A024R1N1 [802-810]	1	1577.92	0	1.52	1.453	1.012	1.279					119.4	111.9	78.5	87.5	88.6	114.1								Not Found	Not Found	Not Found	High	Not Found	Not Found	Not Found	Not Found	Not Found	Not Found	Not Found	Not Found
	FALSE	High	[K].FVSELWK.[D]	1xTMT6plex [K7]; 1xTMT6plex [N-Term]		FALSE	0.0514028	0.00604483	1	4	7	A0A024R1N1	A0A024R1N1 [607-613]	0	1137.65	0	1.751	1.259	3.266	1.858	1	1	1	1	121.4	97.7	69.3	52.6	171.7	87.3	16.64	7.89	14.14	23.27	32.94	44.61		Not Found	Not Found	Not Found	Not Found	Medium	Medium	Not Found	Not Found	Not Found	Not Found	High	High
	FALSE	High	[R].QQQLTAMK.[V]	1xTMT6plex [N-Term]		FALSE	0.063787	0.00735515	1	7	2	A0A024R1N1	A0A024R1N1 [803-810]	0	1176.66	0	0.878	1.377	1.514	1.031					87	80.8	99	78.3	118.6	136.3								High	Not Found	Not Found	Not Found	Not Found	Not Found	Not Found	Not Found	Not Found	Not Found	Not Found	Not Found
	FALSE	High	[K].FDQLLAEEK.[NAST]	1xTMT6plex [K9]; 1xTMT6plex [N-Term]		FALSE	0.063787	0.00735515	3	14	2	P35580; A0A024R1N1; A1L2Z2	P35580 [1453-1461]; A0A024R1N1 [1446-1454]; A1L2Z2 [113-121]	0	1550.88	0																					No Quan Values	Not Found	Not Found	Not Found	Not Found	Not Found	Not Found	Not Found	Not Found	Not Found	Not Found	Not Found	Not Found
	FALSE	High	[K].KDQGELER.[Q]	1xTMT6plex [K1]; 1xTMT6plex [N-Term]		FALSE	0.063787	0.00735515	1	4	1	A0A024R1N1	A0A024R1N1 [202-209]	1	1432.82	0	1.006	1.134	0.665	1.682					71.1	190	70.7	112.9	75.2	80.2								Not Found	Not Found	Not Found	Not Found	Not Found	Not Found	Not Found	Not Found	Not Found	Not Found	Not Found	High
	FALSE	High	[R].EQEVNILK.[K]	1xTMT6plex [K8]; 1xTMT6plex [N-Term]		FALSE	0.0642938	0.00741458	1	3	2	A0A024R1N1	A0A024R1N1 [1166-1173]	0	1430.86	0	1.83	2.064	2.563	1.465					87.9	106.3	48	72.6	186	99.1								Not Found	High	Not Found	Not Found	Not Found	Not Found	Not Found	Not Found	Not Found	Not Found	Not Found	Not Found
	FALSE	High	[R].SMMQDREDQSILCTGESGAGK.[T]	1xCarbamidomethyl [C13]; 1xOxidation [M]		FALSE	0.069561	0.00786479	1	4	3	A0A024R1N1	A0A024R1N1 [160-180]	1	2315.99	0																					No Quan Labels	Not Found	Not Found	Not Found	Not Found	Not Found	High	Not Found	Not Found	Not Found	Not Found	Not Found	Not Found
	FALSE	High	[K].RQQQLTAMK.[V]	1xTMT6plex [N-Term]		FALSE	0.0701082	0.00790471	1	7	2	A0A024R1N1	A0A024R1N1 [802-810]	1	1332.76	0	1.51	0.876	2.394	2.637					122.3	142.4	81	54	129.3	70.9								Not Found	Not Found	Not Found	Not Found	Not Found	Not Found	Not Found	Not Found	Not Found	Not Found	High	Not Found
	FALSE	High	[R].EEILAQAK.[E]			FALSE	0.0812513	0.00889178	1	3	4	A0A024R1N1	A0A024R1N1 [1662-1669]	0	901.499	0																					No Quan Labels	Not Found	Not Found	Not Found	High	High	Not Found	Not Found	Not Found	Not Found	Not Found	Not Found	Not Found
	FALSE	High	[R].QEEEMMAK.[E]	2xOxidation [M5; M6]; 1xTMT6plex [K8]; 1xTMT6plex [N-Term]		FALSE	0.0850782	0.00922376	1	4	1	A0A024R1N1	A0A024R1N1 [843-850]	0	1485.73	0	1.287	1.104	1.927	1.194					103	95.2	80.1	79.7	153.6	88.4								Not Found	Not Found	Not Found	Not Found	Not Found	Not Found	High	Not Found	Not Found	Not Found	Not Found	Not Found
	FALSE	High	[R].CIIPNHEK.[RK]	1xCarbamidomethyl [C1]; 1xTMT6plex [N-Term]; 1xTMT6plex [K8]		FALSE	0.0883824	0.00950908	2	8	4	P35580; A0A024R1N1	P35580 [678-685]; A0A024R1N1 [671-678]	0	1239.67	0	1.49	1.463	2.889	1.757	1	1	1	1	105.1	100	70.5	56.9	164.4	103.1	6.95	5.92	12.94	1.61	2.42	16.86	Shared	Not Found	Not Found	Not Found	Medium	Not Found	Not Found	Not Found	Not Found	Not Found	Not Found	Not Found	High
	FALSE	High	[K].LVWVPSDK.[S]			FALSE	0.0910996	0.00972543	1	6	2	A0A024R1N1	A0A024R1N1 [31-38]	0	943.525	0																					No Quan Labels	Not Found	High	Not Found	Not Found	Not Found	Not Found	Not Found	Not Found	Not Found	Not Found	Not Found	Not Found
	FALSE	High	[K].QACVLMIK.[A]	1xCarbamidomethyl [C3]; 1xOxidation [M6]		FALSE	0.0924825	0.00979374	1	4	2	A0A024R1N1	A0A024R1N1 [738-745]	0	978.511	0																					No Quan Labels	Not Found	Not Found	Not Found	Not Found	Not Found	Not Found	Not Found	Not Found	High	Not Found	Not Found	Not Found
	FALSE	High	[R].YEILTPNSIPK.[G]	1xTMT6plex [K11]; 1xTMT6plex [N-Term]		FALSE	0.0945865	0.00997449	1	4	4	A0A024R1N1	A0A024R1N1 [721-731]	0	1503.86	0	1.519	1.272	2.138	1.336	1	1	0.7104	1	109.6	97.4	72.2	72.9	156	91.8	13.99	7.54	17.77	0.81	12.85	26.12		Not Found	Not Found	Not Found	High	Not Found	Not Found	Not Found	Not Found	High	Not Found	Not Found	Not Found
	FALSE	Medium	[RK].YAEERDR.[A]	1xTMT6plex [N-Term]		FALSE	0.101848	0.0106901	2	4	2	P35580; A0A024R1N1	P35580 [1467-1473]; A0A024R1N1 [1460-1466]	1	1167.6	0	1.209	1.02	1.732	1.901					87.2	150.6	72.1	79.2	137.3	73.6							Shared	Not Found	Not Found	Not Found	Not Found	Not Found	Not Found	Not Found	High	Not Found	Not Found	Not Found	Not Found
	FALSE	Medium	[K].KMEDSVGCLETAEEVK.[R]	1xCarbamidomethyl [C8]; 1xOxidation [M2]; 1xTMT6plex [N-Term]; 1xTMT6plex [K1]		FALSE	0.110244	0.0117039	1	2	4	A0A024R1N1	A0A024R1N1 [1372-1387]	1	2069.99	0	1.917	2.356	1.114	0.73					115.5	72.4	60.3	99.2	110.6	142								Not Found	Not Found	Not Found	Not Found	Not Found	Not Found	High	Not Found	Not Found	Not Found	Not Found	Not Found
	FALSE	Medium	[K].QVEDEK.[N]	1xTMT6plex [K6]; 1xTMT6plex [N-Term]		FALSE	0.121504	0.0130378	1	3	1	A0A024R1N1	A0A024R1N1 [1333-1338]	0	1205.68	0																					No Quan Values	Not Found	Not Found	Not Found	Not Found	Not Found	Not Found	Not Found	High	Not Found	Not Found	Not Found	Not Found
	FALSE	Medium	[R].SMAVAAR.[K]	1xOxidation [M2]; 1xTMT6plex [N-Term]		FALSE	0.123169	0.013283	1	3	3	A0A024R1N1	A0A024R1N1 [1606-1612]	0	950.529	0	1.601	1.469	1.755	1.234	1	1	1	1	124.7	87.6	77.9	70.9	124.5	114.4	19.55	22.91	6.31	10.47	4.27	2.42		Not Found	High	Not Found	Not Found	Not Found	Not Found	Not Found	Not Found	Not Found	High	Not Found	Not Found
	FALSE	Medium	[K].YLYVDK.[N]	1xPhospho [Y3]; 1xTMT6plex [K6]; 1xTMT6plex [N-Term]	A0A024R1N1 1xPhospho [Y11]	FALSE	0.127397	0.013741	1	6	2	A0A024R1N1	A0A024R1N1 [9-14]	0	1338.71	0	0.61	0.398	0.289	0.354	1	1	1	1	122.2	42.6	200.2	120.4	34.8	79.7	9.85	4.02	1.61	10.31	14.51	7.78		Not Found	Not Found	High	Medium	Not Found	Not Found	Not Found	Not Found	Not Found	Not Found	Not Found	Not Found
	FALSE	Medium	[R].NAEQYK.[D]	1xTMT6plex [K6]; 1xTMT6plex [N-Term]		FALSE	0.128255	0.0138968	1	3	2	A0A024R1N1	A0A024R1N1 [1857-1862]	0	1210.68	0	0.754	1.546	0.791	0.777	1	1	1	1	82.5	72.2	109.5	92.9	73.5	169.3	39.68	35.61	12.58	12.14	49.11	28.12		High	High	Not Found	Not Found	Not Found	Not Found	Not Found	Not Found	Not Found	Not Found	Not Found	Not Found
	FALSE	Medium	[R].VEEEAAQK.[N]	1xTMT6plex [K8]; 1xTMT6plex [N-Term]		FALSE	0.130851	0.0140625	1	4	2	A0A024R1N1	A0A024R1N1 [1092-1099]	0	1361.77	0	1.47	1.399	1.952	0.952					110.1	75.7	74.9	79.5	155.1	104.8								Not Found	Not Found	Not Found	Not Found	Not Found	Not Found	Not Found	High	Not Found	Not Found	Not Found	Not Found
	FALSE	Medium	[K].ADEWLMK.[N]	1xTMT6plex [N-Term]		FALSE	0.136157	0.0146263	2	5	2	P35580; A0A024R1N1	P35580 [588-594]; A0A024R1N1 [581-587]	0	1121.59	0	1.582	1.123	3.357	2.27					108.5	118.5	68.6	52.2	175.2	77							Shared	Not Found	Not Found	Not Found	High	Not Found	Not Found	Not Found	Not Found	Not Found	Not Found	Not Found	Not Found
	FALSE	Medium	[K].QIATLHAQVADMK.[K]	1xOxidation [M12]		FALSE	0.143487	0.0154414	1	3	2	A0A024R1N1	A0A024R1N1 [1358-1370]	0	1441.75	0																					No Quan Labels	Not Found	Not Found	Not Found	Not Found	Not Found	Not Found	Not Found	High	Not Found	Not Found	Not Found	Not Found
	FALSE	Medium	[R].TVGQLYK.[E]			FALSE	0.153112	0.016679	2	11	3	P35580; A0A024R1N1	P35580 [652-658]; A0A024R1N1 [645-651]	0	808.456	0																					No Quan Labels	Not Found	Not Found	Not Found	Not Found	Not Found	Not Found	Not Found	Medium	Not Found	Not Found	Not Found	Not Found
	FALSE	Medium	[R].DRAEAEAR.[E]	1xTMT6plex [N-Term]		FALSE	0.161238	0.0175501	2	11	4	P35580; A0A024R1N1	P35580 [1472-1479]; A0A024R1N1 [1465-1472]	1	1146.61	1	0.576	0.795	0.751	0.946	1	1	1	1	63.3	119	110	125.8	94.5	87.4	15.05	13.11	6.32	14.54	5.4	23.83	Shared	Medium	Medium	Not Found	Not Found	High	Not Found	Not Found	Not Found	Not Found	Not Found	Not Found	Not Found
	FALSE	Medium	[K].VAAYDK.[L]	1xTMT6plex [K6]; 1xTMT6plex [N-Term]		FALSE	0.162283	0.0176288	1	2	2	A0A024R1N1	A0A024R1N1 [1405-1410]	0	1124.67	0	1.755	1.242	2.168	1.821	1	1	1	1	117.2	121.6	66.8	66.8	144.8	82.9	10.01	9.92	4.15	14.17	12.91	14.04		Not Found	Not Found	Not Found	Not Found	Not Found	Medium	High	Not Found	Not Found	Not Found	Not Found	Not Found
	FALSE	Medium	[K].ALSLAR.[A]	1xTMT6plex [N-Term]		FALSE	0.163335	0.0177452	2	12	2	P35580; A0A024R1N1	P35580 [1485-1490]; A0A024R1N1 [1478-1483]	0	859.556	0	2.266	1.409	3.155	2.073	1	1	1	1	142.5	101.9	62.9	49.1	155	88.6	3.63	9.21	11.78	0.42	3.66	1.42	Shared	Not Found	Not Found	Not Found	Not Found	Not Found	Not Found	Not Found	High	Medium	Not Found	Not Found	Not Found
	FALSE	Medium	[K].VAAYDK.[L]	1xTMT6plex [N-Term]; 1xTMT6plex [K6]		FALSE	0.167615	0.0182176	1	2	3	A0A024R1N1	A0A024R1N1 [1405-1410]	0	895.509	0	1.449	1.281	2.225	1.342	1	1	1	1	112.3	91.3	77.5	68.1	151.5	99.3	1.28	8.81	12.76	0.26	6.47	7.95		Not Found	Not Found	Not Found	Not Found	Not Found	Not Found	Not Found	Not Found	Medium	Not Found	Medium	High
	FALSE	Medium	[K].VTTEAK.[LM]	1xTMT6plex [K6]; 1xTMT6plex [N-Term]		FALSE	0.1698	0.0185585	1	5	1	A0A024R1N1	A0A024R1N1 [967-972]	0	1106.68	0	0.983	1.27	2.475	0.585					110.2	33.9	112.1	58	143.4	142.4								Not Found	Not Found	Not Found	High	Not Found	Not Found	Not Found	Not Found	Not Found	Not Found	Not Found	Not Found
	FALSE	Medium	[K].ADEWLMK.[N]	1xOxidation [M6]; 1xTMT6plex [N-Term]		FALSE	0.1698	0.0185585	2	5	3	P35580; A0A024R1N1	P35580 [588-594]; A0A024R1N1 [581-587]	0	1137.58	0	1.357	1.294	2.048	1.209	1	1	1	1	114.2	83.1	84.2	68.8	140.8	108.9	20.69	35.31	1.03	1.77	7.99	15.83	Shared	High	Not Found	Not Found	Medium	Not Found	Not Found	Not Found	Not Found	Not Found	Not Found	Not Found	Not Found
	FALSE	Medium	[K].EEELVK.[V]	1xTMT6plex [K6]; 1xTMT6plex [N-Term]		FALSE	0.190909	0.0213416	1	4	2	A0A024R1N1	A0A024R1N1 [851-856]	0	1204.72	1	1.4	0.961	1.697	1.588	1	1	1	1	118.8	116.7	84.9	73.5	124.7	81.5	13.13	30.41	26.07	24.59	27	17.19		Not Found	Not Found	Not Found	Not Found	Not Found	Not Found	Not Found	Medium	Medium	Not Found	Not Found	Not Found
	FALSE	Medium	[K].VMQEQGTHPK.[F]	1xOxidation [M2]		FALSE	0.195984	0.0220267	1	3	2	A0A024R1N1	A0A024R1N1 [546-555]	0	1170.56	0																					No Quan Labels	Not Found	Not Found	Not Found	Not Found	Not Found	Not Found	Not Found	Not Found	Not Found	Not Found	Not Found	Not Found
	FALSE	Medium	[K].KLEMDLK.[D]	1xOxidation [M4]		FALSE	0.195984	0.0220267	1	3	2	A0A024R1N1	A0A024R1N1 [1614-1620]	1	892.481	0																					No Quan Labels	Not Found	Not Found	Medium	Not Found	Not Found	Not Found	Not Found	Not Found	Not Found	Not Found	Not Found	Not Found
	FALSE	Medium	[K].DLEGLSQRHEEK.[V]			FALSE	0.197276	0.0221226	1	2	1	A0A024R1N1	A0A024R1N1 [1393-1404]	1	1440.71	0																					No Quan Labels	Not Found	Not Found	Not Found	Not Found	Not Found	Not Found	Not Found	Not Found	Not Found	Not Found	Not Found	Not Found
	FALSE	Medium	[K].SVHELEK.[S]	1xTMT6plex [N-Term]		FALSE	0.197276	0.0221226	1	3	1	A0A024R1N1	A0A024R1N1 [1519-1525]	0	1070.6	0	1.545	1.201	2.134	1.851					105.3	128	68.2	69.1	147.5	81.9								Not Found	Not Found	Not Found	Not Found	Not Found	Not Found	Not Found	Not Found	Medium	Not Found	Not Found	Not Found
	FALSE	Medium	[K].VKPLLQVSR.[Q]			FALSE	0.19989	0.0224597	1	4	2	A0A024R1N1	A0A024R1N1 [834-842]	0	1039.66	0																					No Quan Labels	Not Found	Not Found	Not Found	Not Found	Not Found	Not Found	Not Found	Not Found	Not Found	Not Found	Not Found	Not Found
	FALSE	Medium	[R].QGFPNR.[LIV]	1xTMT6plex [N-Term]		FALSE	0.203884	0.0229599	3	13	1	A7E2Y1; P35580; A0A024R1N1	A7E2Y1 [756-761]; P35580 [713-718]; A0A024R1N1 [706-711]	0	947.526	0	1.447	1.438	2.243	1.878					108.1	113.6	74.7	60.5	135.7	107.4							Shared	Medium	Not Found	Not Found	Not Found	Not Found	Not Found	Not Found	Not Found	Not Found	Not Found	Not Found	Not Found
	FALSE	Medium	[K].LQAQMK.[D]	1xTMT6plex [K6]; 1xTMT6plex [N-Term]		FALSE	0.214989	0.0242352	2	13	2	P35580; A0A024R1N1	P35580 [1650-1655]; A0A024R1N1 [1643-1648]	0	1176.72	0	1.93	1.32	2.643	2.057	1	1	1	1	129.5	113.6	67.1	55.2	146	88.6	10.96	15	16.96	9.17	13.69	5.52	Shared	Medium	Not Found	Not Found	Not Found	Not Found	Not Found	Not Found	Not Found	Not Found	Not Found	Not Found	Medium
	FALSE	Medium	[K].KLEMDLK.[D]	TMT6plex [K]; 1xTMT6plex [N-Term]		FALSE	0.225283	0.0255923	1	3	5	A0A024R1N1	A0A024R1N1 [1614-1620]	1	1334.81	0	1.711	1.282	2.622	2.559	1	1	1	1	110.5	141.7	64.6	55.4	145.1	82.8	13.54	10.68	9.36	1.64	3.28	2.82		Not Found	Not Found	Not Found	Not Found	Not Found	Not Found	Not Found	Not Found	Medium	Medium	Not Found	Not Found
	FALSE	Medium	[K].YLYVDK.[N]	1xTMT6plex [N-Term]; 1xTMT6plex [K6]		FALSE	0.231424	0.0262739	1	6	3	A0A024R1N1	A0A024R1N1 [9-14]	0	1029.58	0	1.629	1.315	2.591	1.587	1	1	1	1	110.6	101.9	67.9	64.2	166.3	89.2	11.74	4.47	2.62	24.05	18.67	18.83		Not Found	Not Found	Medium	Not Found	Not Found	Medium	Medium	Not Found	Not Found	Not Found	Not Found	Not Found
	FALSE	Medium	[R].QRYEILTPNSIPK.[G]	1xTMT6plex [K13]; 1xTMT6plex [N-Term]		FALSE	0.231424	0.0262739	1	4	2	A0A024R1N1	A0A024R1N1 [719-731]	1	2017.18	0	1.552	1.048	2.667	2.871					99.4	162.2	64.1	56.5	150.7	67.1								Not Found	Not Found	Not Found	Not Found	Not Found	Not Found	Not Found	Not Found	Medium	Not Found	Not Found	Not Found
	FALSE	Medium	[R].EVSSLK.[N]	1xTMT6plex [K6]; 1xTMT6plex [N-Term]		FALSE	0.256204	0.0292856	1	3	2	A0A024R1N1	A0A024R1N1 [1913-1918]	0	1120.7	0	2.117	1.537	1.978	1.841	0.666738	1	0.484003	0.657296	131.7	118.6	62.2	64.4	127.4	95.7	11.96	8.01	3.66	15.71	19.23	23.82		Not Found	Not Found	Not Found	Not Found	Medium	Medium	Not Found	Not Found	Not Found	Not Found	Not Found	Not Found
	FALSE	Medium	[R].AGVLAHLEEER.[D]			FALSE	0.263267	0.0301774	2	5	1	P35580; A0A024R1N1	P35580 [772-782]; A0A024R1N1 [765-775]	0	1223.64	0																					No Quan Labels	Not Found	Not Found	Not Found	Not Found	Not Found	Not Found	Medium	Not Found	Not Found	Not Found	Not Found	Not Found
	FALSE	Medium	[R].TELADK.[V]	1xTMT6plex [K6]; 1xTMT6plex [N-Term]		FALSE	0.274197	0.0315489	1	3	1	A0A024R1N1	A0A024R1N1 [1269-1274]	0	1134.68	0	1.202	1.054	1.321	1.454					95.3	131.7	79.2	90.6	119.7	83.5								Medium	Not Found	Not Found	Not Found	Not Found	Not Found	Not Found	Not Found	Not Found	Not Found	Not Found	Not Found
	FALSE	Medium	[K].RQQQLTAMK.[V]	1xOxidation [M8]; 1xTMT6plex [N-Term]		FALSE	0.274197	0.0315489	1	7	3	A0A024R1N1	A0A024R1N1 [802-810]	1	1348.76	0	1.594	0.917	1.864	1.685	1	1	1	1	139.8	108.1	87.7	64.2	119.6	80.5	5.12	17.43	8.28	12.54	3.06	16.14		Not Found	Not Found	Not Found	Not Found	Not Found	Not Found	Not Found	Not Found	Not Found	Medium	Medium	Medium
	FALSE	Medium	[K].FVSELWK.[D]			FALSE	0.283603	0.0325681	1	4	4	A0A024R1N1	A0A024R1N1 [607-613]	0	908.488	0																					No Quan Labels	Not Found	Not Found	Not Found	Not Found	Not Found	Not Found	Medium	Not Found	Not Found	Not Found	Not Found	Not Found
	FALSE	Medium	[R].TVGQLYK.[E]	1xTMT6plex [N-Term]; 1xTMT6plex [K7]		FALSE	0.295232	0.0341056	2	11	4	P35580; A0A024R1N1	P35580 [652-658]; A0A024R1N1 [645-651]	0	1037.62	0	1.635	1.461	2.666	1.516	1	1	0.108723	1	121.9	86.2	74.6	56.8	151.5	109	8.51	15.88	16.99	7.82	10.45	18.93	Shared	Not Found	Medium	Not Found	Not Found	Medium	Not Found	Not Found	Not Found	Not Found	Not Found	Not Found	Not Found
	FALSE	Medium	[R].TELADK.[V]	1xTMT6plex [N-Term]		FALSE	0.297205	0.0343951	1	3	1	A0A024R1N1	A0A024R1N1 [1269-1274]	0	905.514	0	1.265	0.937	2.058	1.492					99.2	114.4	78.4	76.7	157.8	73.5								Not Found	Not Found	Not Found	Not Found	Not Found	Not Found	Not Found	Medium	Not Found	Not Found	Not Found	Not Found
	FALSE	Medium	[K].LMATLR.[N]	1xTMT6plex [N-Term]		FALSE	0.299188	0.0346035	2	5	2	P35580; A0A024R1N1	P35580 [664-669]; A0A024R1N1 [657-662]	0	933.575	0	1.716	0.972	3.274	2.477	1	1	0.691403	1	111.5	132.2	65	53.4	174.8	63.1	1.05	6.18	6.91	5.42	1.35	4.85	Shared	Not Found	Medium	Medium	Not Found	Not Found	Not Found	Not Found	Not Found	Not Found	Not Found	Not Found	Not Found
	FALSE	Medium	[R].NCAAYLK.[L]	1xCarbamidomethyl [C2]; 1xTMT6plex [N-Term]		FALSE	0.301181	0.0348701	2	11	2	P35580; A0A024R1N1	P35580 [822-828]; A0A024R1N1 [815-821]	0	1068.57	0	0.86	0.804	1.139	0.989					99.1	92.7	115.3	93.6	106.6	92.7							Shared	Medium	Not Found	Not Found	Not Found	Not Found	Not Found	Not Found	Not Found	Not Found	Not Found	Not Found	Not Found
	FALSE	Medium	[R].QEEEMMAK.[E]	1xTMT6plex [N-Term]		FALSE	0.307218	0.0356507	1	4	1	A0A024R1N1	A0A024R1N1 [843-850]	0	1224.58	1	1.452	0.885	3.844	3.162					103.5	143	71.3	45.2	173.8	63.1								Not Found	Not Found	Not Found	Not Found	Not Found	Medium	Not Found	Not Found	Not Found	Not Found	Not Found	Not Found
	FALSE	Medium	[K].REQEVNILK.[K]			FALSE	0.311289	0.0360749	1	3	2	A0A024R1N1	A0A024R1N1 [1165-1173]	1	1128.64	0																					No Quan Labels	Not Found	Not Found	Not Found	Not Found	Not Found	Not Found	Medium	Not Found	Not Found	Not Found	Not Found	Not Found
	FALSE	Medium	[R].EVSSLK.[N]	1xTMT6plex [K6]		FALSE	0.317464	0.036768	1	3	2	A0A024R1N1	A0A024R1N1 [1913-1918]	0	891.535	0	1.773	1.766	1.943	1.35	1	1	0.664804	1	117.9	93.8	66.5	69.5	135	117.4	9.07	8.12	22.4	13.42	22.61	20.89		Not Found	Not Found	Not Found	Not Found	Not Found	Not Found	Not Found	Not Found	Medium	Medium	Not Found	Not Found
	FALSE	Medium	[K].GFMDGK.[Q]	1xTMT6plex [K6]; 1xTMT6plex [N-Term]		FALSE	0.336473	0.0393005	2	11	1	P35580; A0A024R1N1	P35580 [739-744]; A0A024R1N1 [732-737]	0	1112.62	0	2.027	1.236	2.267	3.075					111.4	177.3	55	57.7	130.7	67.9							Shared	Not Found	Not Found	Not Found	Not Found	Not Found	Not Found	Not Found	Not Found	Not Found	Medium	Not Found	Not Found
	FALSE	Medium	[K].LSLSTK.[L]	1xTMT6plex [K6]; 1xTMT6plex [N-Term]		FALSE	0.345159	0.0404599	1	3	2	A0A024R1N1	A0A024R1N1 [1325-1330]	0	1106.72	0	2.024	1.386	2.016	1.686	1	1	1	1	138.7	106.8	68.5	63.3	127.7	95	3.9	10.49	14.21	17.13	14.46	12.16		Not Found	Not Found	Not Found	Medium	Medium	Not Found	Not Found	Not Found	Not Found	Not Found	Not Found	Not Found
	FALSE	Medium	[K].YLYVDK.[N]			FALSE	0.351771	0.041311	1	6	1	A0A024R1N1	A0A024R1N1 [9-14]	0	800.419	0																					No Quan Labels	Not Found	Not Found	Not Found	Not Found	Not Found	Not Found	Not Found	Not Found	Not Found	Not Found	Not Found	Not Found
	FALSE	Medium	[R].VVFQEFR.[Q]	1xTMT6plex [N-Term]		FALSE	0.369819	0.0436587	1	4	2	A0A024R1N1	A0A024R1N1 [712-718]	0	1153.66	0	1.666	1.408	1.834	1.947					110.8	134	66.5	68.8	126.2	93.7								Not Found	Not Found	Not Found	Not Found	Not Found	Not Found	Not Found	Not Found	Not Found	Not Found	Medium	Not Found
	FALSE	Medium	[K].LQAQMK.[D]	1xOxidation [M5]; 1xTMT6plex [K6]; 1xTMT6plex [N-Term]		FALSE	0.381412	0.044988	2	13	1	P35580; A0A024R1N1	P35580 [1650-1655]; A0A024R1N1 [1643-1648]	0	1192.71	0	1.535	1.385	1.236	0.832					128.2	73.9	83.6	88.8	109.8	115.7							Shared	Not Found	Not Found	Not Found	Not Found	Not Found	Not Found	Not Found	Not Found	Medium	Not Found	Not Found	Not Found
	FALSE	Medium	[K].LQAQMK.[D]	1xOxidation [M5]; 1xTMT6plex [K6]		FALSE	0.38376	0.045234	2	13	2	P35580; A0A024R1N1	P35580 [1650-1655]; A0A024R1N1 [1643-1648]	0	963.549	0	1.538	1.908	1.604	0.894	1	1	1	1	110.7	71.6	72	80.1	128.4	137.3	26.31	3.55	23.84	23.96	17.45	9.31	Shared	Not Found	Not Found	Not Found	Not Found	Not Found	Not Found	Not Found	Not Found	Medium	Not Found	Not Found	Medium
	FALSE	Medium	[K].GFMDGK.[Q]	1xTMT6plex [N-Term]		FALSE	0.390862	0.0459975	2	11	1	P35580; A0A024R1N1	P35580 [739-744]; A0A024R1N1 [732-737]	0	883.455	0	1.671	1.228	2.701	2.275					105.5	134.7	63.1	59.2	159.9	77.5							Shared	Not Found	Not Found	Not Found	Medium	Not Found	Not Found	Not Found	Not Found	Not Found	Not Found	Not Found	Not Found
	FALSE	Medium	[R].NTNPNFVR.[C]			FALSE	0.42015	0.0496049	2	5	2	P35580; A0A024R1N1	P35580 [670-677]; A0A024R1N1 [663-670]	0	961.485	0																					No Quan Labels	Not Found	Not Found	Not Found	Not Found	Not Found	Not Found	Medium	Not Found	Not Found	Not Found	Not Found	Not Found
FALSE	High	Master Protein	A0A1S5UZ07	Talin-1 OS=Homo sapiens OX=9606 GN=TLN1 PE=2 SV=1	0	FALSE	1079.94	59	141	943	117	1	2558	271.3	6.11	7586	1363.57	129	139	cell organization and biogenesis;cellular component movement;regulation of biological process;response to stimulus;transport	cell surface;cytoskeleton;cytosol;extracellular	protein binding;structural molecule activity	Pf00373, Pf01608, Pf02174, Pf08913, Pf09141, Pf09379	7094	TLN1	9	Focal Adhesion; Integrin-mediated Cell Adhesion			38	1.56	1.034	1.904	1.418	1	1	0.117068	1	112.1	112.1	71.9	79.1	150.5	74.3	9.86	14.6	7.53	12.98	8.02
	Checked	Confidence	Annotated Sequence	Modifications	Modifications in Master Proteins	Contaminant	Qvality PEP	Qvality q-value	# Protein Groups	# Proteins	# PSMs	Master Protein Accessions	Positions in Master Proteins	# Missed Cleavages	Theo. MH+ [Da]	# Razor Quan Results	Abundance Ratio: (126) / (128)	Abundance Ratio: (131) / (128)	Abundance Ratio: (130) / (129)	Abundance Ratio: (127) / (129)	Abundance Ratio Adj. P-Value: (126) / (128)	Abundance Ratio Adj. P-Value: (131) / (128)	Abundance Ratio Adj. P-Value: (130) / (129)	Abundance Ratio Adj. P-Value: (127) / (129)	Abundances (Grouped): 126	Abundances (Grouped): 127	Abundances (Grouped): 128	Abundances (Grouped): 129	Abundances (Grouped): 130	Abundances (Grouped): 131	Abundances (Grouped) CV [%]: 126	Abundances (Grouped) CV [%]: 127	Abundances (Grouped) CV [%]: 128	Abundances (Grouped) CV [%]: 129	Abundances (Grouped) CV [%]: 130	Abundances (Grouped) CV [%]: 131	Quan Info	Found in Sample: [S1] F1: 126, Sample	Found in Sample: [S2] F2: 126, Sample	Found in Sample: [S3] F3: 126, Sample	Found in Sample: [S4] F4: 126, Sample	Found in Sample: [S5] F5: 126, Sample	Found in Sample: [S6] F6: 126, Sample	Found in Sample: [S7] F7: 126, Sample	Found in Sample: [S8] F8: 126, Sample	Found in Sample: [S9] F9: 126, Sample	Found in Sample: [S10] F10: 126, Sample	Found in Sample: [S11] F11: 126, Sample	Found in Sample: [S12] F12: 126, Sample
	FALSE	High	[K].QAAASATQTIAAAQHAASTPK.[A]	1xTMT6plex [K21]; 1xTMT6plex [N-Term]		FALSE	1.80693e-05	0	1	2	2	A0A1S5UZ07	A0A1S5UZ07 [940-960]	0	2453.35	0	1.337	0.798	2.865	1.618					107.5	102.7	80.4	63.5	181.8	64.1								Not Found	Not Found	Not Found	Not Found	Not Found	Not Found	Not Found	Not Found	Not Found	Not Found	Not Found	High
	FALSE	High	[K].QAAASATQTIAAAQHAASTPK.[A]			FALSE	6.98684e-05	0	1	2	4	A0A1S5UZ07	A0A1S5UZ07 [940-960]	0	1995.03	0																					No Quan Labels	Not Found	Not Found	Not Found	Not Found	Not Found	Not Found	Not Found	Not Found	High	High	Not Found	Not Found
	FALSE	High	[K].CTQDLGNSTK.[A]	1xCarbamidomethyl [C1]; 1xTMT6plex [K10]; 1xTMT6plex [N-Term]		FALSE	7.10072e-05	0	1	2	2	A0A1S5UZ07	A0A1S5UZ07 [1104-1113]	0	1581.83	0	1.717	1.238	2.084	1.743					113.2	122.5	65.9	70.3	146.4	81.7								Not Found	High	Not Found	Not Found	Not Found	Not Found	Not Found	Not Found	Not Found	Not Found	Not Found	Not Found
	FALSE	High	[K].CTQDLGNSTK.[A]	1xCarbamidomethyl [C1]; 1xTMT6plex [N-Term]; 1xTMT6plex [K10]		FALSE	4.58859e-05	0	1	2	4	A0A1S5UZ07	A0A1S5UZ07 [1104-1113]	0	1352.67	0	0.314	0.413	0.558	0.603					39.5	106.9	125.6	177.3	98.9	51.9								Not Found	Not Found	Not Found	Not Found	Not Found	Not Found	Not Found	High	High	Not Found	Not Found	Not Found
	FALSE	High	[K].LAQAAQSSVATITR.[L]			FALSE	4.33862e-06	0	1	2	6	A0A1S5UZ07	A0A1S5UZ07 [2061-2074]	0	1416.78	0																					No Quan Labels	Not Found	Not Found	Not Found	Not Found	Not Found	Not Found	Not Found	Not Found	Not Found	High	Not Found	High
	FALSE	High	[K].LAQAAQSSVATITR.[L]	1xTMT6plex [N-Term]		FALSE	3.26489e-06	0	1	2	4	A0A1S5UZ07	A0A1S5UZ07 [2061-2074]	0	1645.94	0	1.395	0.86	2.628	1.872	1	1	1	1	108.8	117.8	78	62.9	165.4	67.1	8.84	7.73	16.38	5.92	21.55	29.12		Not Found	Not Found	Not Found	Not Found	Not Found	Not Found	Not Found	Not Found	Not Found	High	High	Not Found
	FALSE	High	[K].EADESLNFEEQILEAAK.[S]	1xTMT6plex [N-Term]		FALSE	1.68897e-07	0	1	2	2	A0A1S5UZ07	A0A1S5UZ07 [2351-2367]	0	2165.08	0	1.39	0.86	1.827	1.336					102.9	115.3	74.1	86.3	157.6	63.7								Not Found	Not Found	Not Found	Not Found	Not Found	Not Found	Not Found	High	Not Found	Not Found	Not Found	Not Found
	FALSE	High	[K].EADESLNFEEQILEAAK.[S]	1xPhospho [S5]	A0A1S5UZ07 1xPhospho [S2355]	FALSE	2.37455e-05	0	1	2	4	A0A1S5UZ07	A0A1S5UZ07 [2351-2367]	0	2015.88	0																					No Quan Labels	Not Found	Not Found	Not Found	Not Found	Not Found	High	Not Found	Not Found	Not Found	Not Found	Not Found	Not Found
	FALSE	High	[K].EADESLNFEEQILEAAK.[S]			FALSE	5.06418e-05	0	1	2	2	A0A1S5UZ07	A0A1S5UZ07 [2351-2367]	0	1935.92	0																					No Quan Labels	Not Found	Not Found	Not Found	Not Found	Not Found	Not Found	Not Found	Not Found	Not Found	Not Found	Not Found	Not Found
	FALSE	High	[R].DDILNGSHPVSFDK.[A]			FALSE	2.18114e-05	0	1	2	2	A0A1S5UZ07	A0A1S5UZ07 [221-234]	0	1543.74	0																					No Quan Labels	Not Found	Not Found	Not Found	Not Found	Not Found	Not Found	Not Found	High	Not Found	Not Found	Not Found	Not Found
	FALSE	High	[R].DDILNGSHPVSFDK.[A]	1xTMT6plex [K14]; 1xTMT6plex [N-Term]		FALSE	4.11066e-06	0	1	2	4	A0A1S5UZ07	A0A1S5UZ07 [221-234]	0	2002.06	0	0.412	0.433	0.49	1.674	1	1	1	1	30.8	244.5	74.7	146	71.6	32.3	24.73	8.76	19.68	11.78	22.74	1.08		Not Found	Not Found	Not Found	High	High	Not Found	Not Found	Not Found	Not Found	Not Found	Not Found	Not Found
	FALSE	High	[R].DDILNGSHPVSFDK.[A]	1xTMT6plex [K14]; 1xTMT6plex [N-Term]		FALSE	4.73166e-05	0	1	2	6	A0A1S5UZ07	A0A1S5UZ07 [221-234]	0	1772.9	0	0.515	0.439	0.702	1.626	1	1	1	1	42.4	214.5	82.4	131.9	92.7	36.1	22.61	2.51	6.44	11.97	7.47	2.01		Not Found	Not Found	Not Found	Not Found	Not Found	Not Found	Not Found	Not Found	Not Found	Not Found	High	High
	FALSE	High	[K].SNTSPEELGPLANQLTSDYGR.[L]	1xTMT6plex [N-Term]		FALSE	1.04207e-06	0	1	2	2	A0A1S5UZ07	A0A1S5UZ07 [1892-1912]	0	2478.23	0	1.122	0.633	2.619	1.688					95.9	115.9	85.5	68.7	179.9	54.1								High	Not Found	Not Found	Not Found	Not Found	Not Found	Not Found	Not Found	Not Found	Not Found	Not Found	Not Found
	FALSE	High	[K].AVAEQIPLLVQGVR.[G]			FALSE	2.05352e-05	0	1	2	5	A0A1S5UZ07	A0A1S5UZ07 [975-988]	0	1492.88	0																					No Quan Labels	Not Found	Not Found	Medium	High	Not Found	Not Found	Not Found	Not Found	Not Found	Not Found	Not Found	Not Found
	FALSE	High	[R].MATNAAAQNAIK.[K]	1xOxidation [M1]; 1xTMT6plex [N-Term]		FALSE	6.78561e-05	0	1	2	1	A0A1S5UZ07	A0A1S5UZ07 [916-927]	0	1448.77	0	1.545	0.921	3.24	1.514					115.5	89.7	74.8	59.2	191.9	68.9								Not Found	High	Not Found	Not Found	Not Found	Not Found	Not Found	Not Found	Not Found	Not Found	Not Found	Not Found
	FALSE	High	[R].MATNAAAQNAIK.[K]	1xTMT6plex [K12]; 1xTMT6plex [N-Term]		FALSE	4.72985e-06	0	1	2	5	A0A1S5UZ07	A0A1S5UZ07 [916-927]	0	1661.94	0	2.586	1.457	2.711	2.461	1	1	1	1	162.3	113	62.8	45.9	124.5	91.5	34.52	18	3.23	11.09	62.07	52.6		Not Found	Not Found	Not Found	Not Found	Not Found	Not Found	Not Found	High	High	Not Found	Not Found	Not Found
	FALSE	High	[R].MATNAAAQNAIK.[K]	1xOxidation [M1]; 1xTMT6plex [K12]; 1xTMT6plex [N-Term]		FALSE	5.48126e-06	0	1	2	2	A0A1S5UZ07	A0A1S5UZ07 [916-927]	0	1677.94	0	1.771	1.438	1.832	1.001					126.4	78.2	71.4	78.1	143.1	102.7								Not Found	Not Found	Not Found	High	Not Found	Not Found	Not Found	Not Found	Not Found	Not Found	Not Found	Not Found
	FALSE	High	[R].MATNAAAQNAIK.[K]	1xOxidation [M1]		FALSE	5.77329e-05	0	1	2	2	A0A1S5UZ07	A0A1S5UZ07 [916-927]	0	1219.61	0																					No Quan Labels	Not Found	Not Found	Not Found	Not Found	Not Found	High	Not Found	Not Found	Not Found	Not Found	Not Found	Not Found
	FALSE	High	[K].VGAIPANALDDGQWSQGLISAAR.[M]			FALSE	2.36105e-06	0	1	2	4	A0A1S5UZ07	A0A1S5UZ07 [2393-2415]	0	2310.18	0																					No Quan Labels	Not Found	Not Found	Not Found	Not Found	Not Found	Not Found	Not Found	Not Found	Not Found	Not Found	Not Found	Not Found
	FALSE	High	[K].VGDDPAVWQLK.[N]	1xTMT6plex [K11]; 1xTMT6plex [N-Term]		FALSE	4.3589e-05	0	1	2	6	A0A1S5UZ07	A0A1S5UZ07 [2122-2132]	0	1685.96	0	1.969	1.083	2.883	1.612	1	1	1	1	130.2	97.5	66.1	60.4	174.3	71.6	2.35	11.45	10.36	20	7	2.1		Not Found	Not Found	Not Found	Not Found	Not Found	Not Found	Not Found	High	High	High	Not Found	Not Found
	FALSE	High	[R].MATNAAAQNAIK.[K]			FALSE	1.54476e-05	0	1	2	2	A0A1S5UZ07	A0A1S5UZ07 [916-927]	0	1203.62	0																					No Quan Labels	Not Found	Not Found	Not Found	Not Found	Not Found	Not Found	High	Not Found	Not Found	Not Found	Not Found	Not Found
	FALSE	High	[R].AVTDSINQLITMCTQQAPGQK.[E]	1xCarbamidomethyl [C13]; 1xOxidation [M12]; 1xTMT6plex [K21]; 1xTMT6plex [N-Term]		FALSE	5.81191e-05	0	1	2	6	A0A1S5UZ07	A0A1S5UZ07 [1358-1378]	0	2778.45	0	1.485	0.584	2.906	1.86	1	1	1	1	101.9	125.6	68.6	67.5	196.3	40.1	0.52	11.37	12.92	8.81	13.43	35.21		Not Found	Not Found	Not Found	Not Found	High	High	Not Found	Not Found	Not Found	Not Found	Not Found	Not Found
	FALSE	High	[R].QEDVIATANLSR.[KR]	1xTMT6plex [N-Term]		FALSE	2.3083e-05	0	2	6	4	Q9Y4G6; A0A1S5UZ07	Q9Y4G6 [2199-2210]; A0A1S5UZ07 [2215-2226]	0	1545.84	0	1.539	1.09	2.205	1.624	1	1	1	1	105.8	117.9	68.8	72.6	160	75	8.63	9.95	3.24	15.79	0.05	14.88	Shared	Not Found	Not Found	Not Found	Not Found	Not Found	Not Found	Not Found	Not Found	Not Found	High	High	Not Found
	FALSE	High	[K].TLSHPQQMALLDQTK.[T]			FALSE	6.25173e-05	0	1	2	3	A0A1S5UZ07	A0A1S5UZ07 [1769-1783]	0	1710.88	0																					No Quan Labels	Not Found	Not Found	Not Found	Not Found	Not Found	Not Found	Not Found	Not Found	Not Found	High	Not Found	Not Found
	FALSE	High	[K].NLGTALAELR.[T]			FALSE	5.23819e-05	0	1	2	2	A0A1S5UZ07	A0A1S5UZ07 [1043-1052]	0	1057.6	0																					No Quan Labels	Not Found	Not Found	Not Found	Not Found	Not Found	Not Found	Not Found	Not Found	Not Found	Not Found	Not Found	Not Found
	FALSE	High	[K].HTSALCNSCR.[L]	2xCarbamidomethyl [C6; C9]; 1xTMT6plex [N-Term]		FALSE	3.39765e-05	0	1	2	5	A0A1S5UZ07	A0A1S5UZ07 [1518-1527]	0	1434.68	0	1.495	1.066	2.741	1.864	1	1	1	1	107.7	114.2	72	61.3	168	76.8	13.55	17.26	41.56	8.47	14.69	14.88		High	High	Not Found	Not Found	Not Found	Not Found	Not Found	Not Found	Not Found	Not Found	Not Found	High
	FALSE	High	[K].TMQFEPSTMVYDACR.[I]	1xCarbamidomethyl [C14]; 2xOxidation [M2; M9]; 1xTMT6plex [N-Term]		FALSE	2.14283e-05	0	1	2	3	A0A1S5UZ07	A0A1S5UZ07 [16-30]	0	2096.93	0	2.297	2.015	1.695	0.586					167.3	38.1	72.8	64.9	110.1	146.8								Not Found	Not Found	Not Found	Not Found	Not Found	Not Found	Not Found	Not Found	Not Found	Not Found	High	Not Found
	FALSE	High	[K].TMLESAGGLIQTAR.[A]	1xTMT6plex [N-Term]		FALSE	1.05739e-05	0	1	2	2	A0A1S5UZ07	A0A1S5UZ07 [1622-1635]	0	1676.92	0	0.565	0.528	1.258	1.045					48.7	132.8	86.1	127.1	159.9	45.4								High	Not Found	Not Found	Not Found	Not Found	Not Found	Not Found	Not Found	Not Found	Not Found	Not Found	Not Found
	FALSE	High	[K].TMLESAGGLIQTAR.[A]	1xOxidation [M2]		FALSE	4.88546e-06	0	1	2	2	A0A1S5UZ07	A0A1S5UZ07 [1622-1635]	0	1463.75	0																					No Quan Labels	Not Found	Not Found	Not Found	Not Found	Not Found	Not Found	Not Found	Not Found	High	Not Found	Not Found	Not Found
	FALSE	High	[K].TMLESAGGLIQTAR.[A]			FALSE	1.06119e-05	0	1	2	2	A0A1S5UZ07	A0A1S5UZ07 [1622-1635]	0	1447.76	0																					No Quan Labels	Not Found	Not Found	Not Found	Not Found	Not Found	Not Found	Not Found	Not Found	Not Found	Not Found	Not Found	Not Found
	FALSE	High	[R].DPVQLNLLYVQAR.[D]			FALSE	1.87902e-05	0	2	3	2	Q9Y4G6; A0A1S5UZ07	Q9Y4G6 [210-222]; A0A1S5UZ07 [208-220]	0	1528.85	0																					No Quan Labels	Not Found	Not Found	Not Found	Not Found	Not Found	Not Found	Not Found	Not Found	Not Found	Not Found	Not Found	Not Found
	FALSE	High	[R].DPPSWSVLAGHSR.[T]	1xTMT6plex [N-Term]		FALSE	9.98453e-06	0	1	2	4	A0A1S5UZ07	A0A1S5UZ07 [1643-1655]	0	1637.86	0	0.888	1.036	1.206	1.06	1	1	1	1	76.8	112.7	86.5	106.3	128.2	89.6	6.29	27.57	19.29	51.69	25.8	6.39		Not Found	Not Found	Not Found	Not Found	Not Found	Not Found	High	High	Not Found	Not Found	Not Found	Not Found
	FALSE	High	[K].NCGQMSEIEAK.[V]	1xCarbamidomethyl [C2]; 1xTMT6plex [K11]; 1xTMT6plex [N-Term]		FALSE	1.30605e-05	0	1	2	2	A0A1S5UZ07	A0A1S5UZ07 [285-295]	0	1724.87	0	1.367	0.87	1.391	2.773					84.2	215.1	61.6	77.6	107.9	53.6								Not Found	Not Found	Not Found	Not Found	Not Found	Not Found	Not Found	Not Found	Not Found	Not Found	High	Not Found
	FALSE	High	[K].NCGQMSEIEAK.[V]	1xCarbamidomethyl [C2]; 1xOxidation [M5]; 1xTMT6plex [K11]; 1xTMT6plex [N-Term]		FALSE	3.89043e-05	0	1	2	6	A0A1S5UZ07	A0A1S5UZ07 [285-295]	0	1740.87	0	1.472	0.885	1.278	1.657	1	1	1	1	104.5	152.3	71	91.9	117.4	62.8	10.78	20.9	8.53	3.89	5.89	16.99		Not Found	Not Found	Not Found	Not Found	Not Found	Not Found	Not Found	Not Found	High	High	High	Not Found
	FALSE	High	[R].DLDQASLAAVSQQLAPR.[E]			FALSE	9.36038e-06	0	1	2	4	A0A1S5UZ07	A0A1S5UZ07 [1691-1707]	0	1782.93	0																					No Quan Labels	Not Found	Not Found	Not Found	Not Found	Not Found	Not Found	Not Found	Not Found	Not Found	Not Found	High	Not Found
	FALSE	High	[R].DLDQASLAAVSQQLAPR.[E]	1xTMT6plex [N-Term]		FALSE	2.25979e-05	0	1	2	4	A0A1S5UZ07	A0A1S5UZ07 [1691-1707]	0	2012.1	0	0.614	0.323	1.115	2.291	1	1	1	1	42.2	242.8	68.7	105.9	118.1	22.2	6.35	1.54	2.02	8.15	10.64	19.09		Not Found	Not Found	Not Found	Not Found	Not Found	High	High	Not Found	Not Found	Not Found	Not Found	Not Found
	FALSE	High	[K].NGNLPEFGDAISTASK.[A]	1xTMT6plex [N-Term]; 1xTMT6plex [K16]		FALSE	3.09324e-06	0	1	2	4	A0A1S5UZ07	A0A1S5UZ07 [1433-1448]	0	1849.95	0	0.976	0.734	1.564	1.234	1	1	1	1	85.7	117.6	87.8	95.3	149.1	64.4	21.84	16.81	4.29	3.59	13.06	28.78		Not Found	Not Found	High	Not Found	Not Found	Not Found	Not Found	Not Found	Not Found	Not Found	Not Found	High
	FALSE	High	[K].DHFGLEGDEESTMLEDSVSPK.[K]	1xOxidation [M13]; 1xTMT6plex [K21]; 1xTMT6plex [N-Term]		FALSE	8.5165e-07	0	1	2	8	A0A1S5UZ07	A0A1S5UZ07 [407-427]	0	2796.33	0	0.478	0.242	0.405	1.718	1	1	1	1	41.4	248.2	86.5	144.5	58.5	20.9	10.61	14.56	10.21	14.74	3.87	23.85		Not Found	Not Found	Not Found	Not Found	Not Found	Not Found	Not Found	High	High	Not Found	Not Found	Not Found
	FALSE	High	[K].DHFGLEGDEESTMLEDSVSPKK.[S]	1xOxidation [M13]; 2xTMT6plex [K21; K22]; 1xTMT6plex [N-Term]		FALSE	3.75802e-05	0	1	2	2	A0A1S5UZ07	A0A1S5UZ07 [407-428]	1	3153.59	0	0.953	0.696	0.259	1.148					72.6	189.9	76.2	165.4	42.9	53								Not Found	Not Found	Not Found	Not Found	Not Found	Not Found	Not Found	Not Found	Not Found	Not Found	High	Not Found
	FALSE	High	[K].DHFGLEGDEESTMLEDSVSPKK.[S]	1xPhospho [S19]; 1xOxidation [M13]; 2xTMT6plex [K21; K22]; 1xTMT6plex [N-Term]	A0A1S5UZ07 1xPhospho [S425]	FALSE	1.229e-05	0	1	2	3	A0A1S5UZ07	A0A1S5UZ07 [407-428]	1	3233.55	0	0.5	0.333	0.147	0.164	1	1	0.0421769	0.0855955	85.5	35.8	171	218.7	32.1	56.9	18.67	47.3	19.31	11.5	25.95	8.21		Not Found	Not Found	Not Found	Not Found	Not Found	Not Found	Not Found	High	High	High	Not Found	Not Found
	FALSE	High	[K].DHFGLEGDEESTMLEDSVSPK.[K]	1xTMT6plex [K21]; 1xTMT6plex [N-Term]		FALSE	5.23819e-05	0	1	2	4	A0A1S5UZ07	A0A1S5UZ07 [407-427]	0	2780.33	0	0.286	0.673	0.469	1.199	1		1	1	26.3	188.6	92	157.3	73.8	61.9	51.35	80.37	15.2	66.9	10.21			Not Found	Not Found	Not Found	Not Found	Not Found	Not Found	Not Found	Not Found	High	High	Not Found	Not Found
	FALSE	High	[K].DHFGLEGDEESTMLEDSVSPK.[K]	1xTMT6plex [N-Term]		FALSE	1.51581e-06	0	1	2	2	A0A1S5UZ07	A0A1S5UZ07 [407-427]	0	2551.17	0	0.397	1.366	0.621	1.03					31.1	149.1	78.2	144.8	89.9	106.9								Not Found	Not Found	Not Found	Not Found	Not Found	Not Found	Not Found	High	Not Found	Not Found	Not Found	Not Found
	FALSE	High	[K].EVIQEWNLTNIK.[R]	1xTMT6plex [K12]; 1xTMT6plex [N-Term]		FALSE	1.11977e-05	0	1	2	6	A0A1S5UZ07	A0A1S5UZ07 [346-357]	0	1715.95	0	1.429	0.612	3.064	1.56	1	1	1	1	119.7	95.8	83.7	61.4	188.1	51.3	19.83	13.51	26.91	22.43	5.79	15.33		Not Found	Not Found	Not Found	Not Found	High	Not Found	High	High	Not Found	Not Found	Not Found	Not Found
	FALSE	High	[K].AGALQCSPSDAYTK.[K]	1xCarbamidomethyl [C6]; 1xTMT6plex [K14]; 1xTMT6plex [N-Term]		FALSE	4.0959e-06	0	1	2	6	A0A1S5UZ07	A0A1S5UZ07 [1951-1964]	0	1697.84	0	1.669	1.026	3.815	1.551	1	1	0.0776833	1	130.7	75.7	78.3	48.8	186.1	80.4	6	3.53	11.38	13.43	0.21	8.87		High	High	Not Found	Not Found	Not Found	Not Found	Not Found	Not Found	Not Found	High	Not Found	Not Found
	FALSE	High	[K].AGALQCSPSDAYTK.[K]	1xCarbamidomethyl [C6]; 1xTMT6plex [K14]; 1xTMT6plex [N-Term]		FALSE	1.90208e-06	0	1	2	2	A0A1S5UZ07	A0A1S5UZ07 [1951-1964]	0	1927	0	1.736	1.099	2.619	1.555					117.7	102.2	67.8	65.7	172.1	74.5								Not Found	Not Found	Not Found	Not Found	Not Found	High	Not Found	Not Found	Not Found	Not Found	Not Found	Not Found
	FALSE	High	[R].ALEATTEHIR.[Q]	1xTMT6plex [N-Term]		FALSE	3.877e-05	0	1	2	4	A0A1S5UZ07	A0A1S5UZ07 [2162-2171]	0	1369.76	0	1.849	1.237	3.022	1.362	1	1	1	1	130.4	78.9	70.5	57.9	175.1	87.2	4.13	27.08	8.22	0.24	1.1	9.73		Not Found	Not Found	Not Found	Not Found	Not Found	Not Found	Not Found	Not Found	Not Found	Not Found	High	High
	FALSE	High	[R].SGASGPENFQVGSMPPAQQQITSGQMHR.[G]	1xOxidation [M]; 1xTMT6plex [N-Term]		FALSE	1.73138e-05	0	1	2	4	A0A1S5UZ07	A0A1S5UZ07 [455-482]	0	3172.51	0	0.475	0.641	0.788	0.553					74.6	63.3	156.9	114.5	90.2	100.6								Not Found	Not Found	Not Found	Not Found	Not Found	Not Found	Not Found	Not Found	Not Found	Not Found	Not Found	High
	FALSE	High	[R].SGASGPENFQVGSMPPAQQQITSGQMHR.[G]	2xOxidation [M14; M26]; 1xTMT6plex [N-Term]		FALSE	4.26126e-06	0	1	2	6	A0A1S5UZ07	A0A1S5UZ07 [455-482]	0	3188.51	0	1.424	1.343	1.014	0.538	1	1	1	1	128.3	55	90.1	102.2	103.6	120.9	1.45	12.68	31.93	9.2	38.71	2.87		High	Not Found	Not Found	Not Found	Not Found	Not Found	Not Found	Not Found	Not Found	Not Found	High	High
	FALSE	High	[K].ALGDLISATK.[A]	1xTMT6plex [K10]; 1xTMT6plex [N-Term]		FALSE	1.64715e-05	0	1	2	3	A0A1S5UZ07	A0A1S5UZ07 [2107-2116]	0	1446.89	0	1.681	0.928	2.728	1.652					120.3	105	71.5	63.5	173.4	66.3								Not Found	Not Found	Not Found	Not Found	High	Not Found	Not Found	Not Found	Not Found	Not Found	Not Found	Not Found
	FALSE	High	[K].EVANSTANLVK.[T]	1xTMT6plex [K11]; 1xTMT6plex [N-Term]		FALSE	1.69477e-05	0	2	6	4	Q9Y4G6; A0A1S5UZ07	Q9Y4G6 [1533-1543]; A0A1S5UZ07 [1548-1558]	0	1603.94	0	1.843	1.231	2.928	1.67	1	1	1	1	122.3	98.4	66.3	58.9	172.4	81.7	0.41	7.48	4.56	17.01	22.92	30.06	Shared	Not Found	Not Found	Not Found	Not Found	High	High	Not Found	Not Found	Not Found	Not Found	Not Found	Not Found
	FALSE	High	[K].EVANSTANLVK.[T]	1xTMT6plex [N-Term]; 1xTMT6plex [K11]		FALSE	6.69772e-05	0	2	6	4	Q9Y4G6; A0A1S5UZ07	Q9Y4G6 [1533-1543]; A0A1S5UZ07 [1548-1558]	0	1374.78	0	2.089	1.462	2.842	1.354	1	1	1	1	131.2	81.9	62.8	60.5	171.9	91.8	9.37	16.85	22.8	13.62	0.78	3.6	Shared	Not Found	Not Found	Not Found	Not Found	Not Found	Not Found	Not Found	Not Found	Not Found	High	Not Found	High
	FALSE	High	[R].ILAQATSDLVNAIK.[A]			FALSE	5.63989e-05	0	1	2	4	A0A1S5UZ07	A0A1S5UZ07 [845-858]	0	1456.84	0																					No Quan Labels	Not Found	Not Found	Not Found	Not Found	Not Found	Not Found	Not Found	Not Found	Not Found	Not Found	Not Found	Not Found
	FALSE	High	[K].LHTDDELNWLDHGR.[T]	1xTMT6plex [N-Term]		FALSE	1.62384e-05	0	1	2	4	A0A1S5UZ07	A0A1S5UZ07 [165-178]	0	1949.97	0	1.567	0.581	1.481	2.39	1	1	1	1	109.9	186.1	70.1	77.9	115.3	40.7	14.09	5.54	17.98	31.8	23.17	14.15		High	High	Not Found	Not Found	Not Found	Not Found	Not Found	Not Found	Not Found	Not Found	Not Found	Not Found
	FALSE	High	[R].LNEAAAGLNQAATELVQASR.[G]			FALSE	6.73818e-07	0	1	2	4	A0A1S5UZ07	A0A1S5UZ07 [1259-1278]	0	2027.05	0																					No Quan Labels	Not Found	Not Found	Not Found	Not Found	Not Found	Not Found	Not Found	Not Found	Not Found	Not Found	Not Found	Not Found
	FALSE	High	[R].AAMEPIVISAK.[T]	1xTMT6plex [K11]; 1xTMT6plex [N-Term]		FALSE	5.87026e-05	0	1	2	2	A0A1S5UZ07	A0A1S5UZ07 [1611-1621]	0	1587.95	0	1.426	0.882	3.453	2.12					87.3	128.2	61.2	60.5	208.8	54								Not Found	Not Found	Not Found	Not Found	Not Found	Not Found	Not Found	Not Found	Not Found	Not Found	High	Not Found
	FALSE	High	[R].LQAAGNAVKR.[A]	1xTMT6plex [N-Term]		FALSE	3.48151e-05	0	2	5	2	Q9Y4G6; A0A1S5UZ07	Q9Y4G6 [2457-2466]; A0A1S5UZ07 [2473-2482]	1	1256.76	0	2.147	1.316	1.955	1.287					147.3	89.2	68.6	69.3	135.5	90.3							Shared	Not Found	Not Found	Not Found	Not Found	High	Not Found	Not Found	Not Found	Not Found	Not Found	Not Found	Not Found
	FALSE	High	[R].IPEAPAGPPSDFGLFLSDDDPKK.[G]			FALSE	4.3589e-05	0	1	2	2	A0A1S5UZ07	A0A1S5UZ07 [36-58]	1	2413.19	0																					No Quan Labels	Not Found	Not Found	Not Found	Not Found	Not Found	Not Found	Not Found	Not Found	Not Found	Not Found	Not Found	Not Found
	FALSE	High	[K].ADAEGESDLENSRK.[L]	1xTMT6plex [N-Term]; 1xTMT6plex [K14]		FALSE	8.43533e-06	0	1	2	10	A0A1S5UZ07	A0A1S5UZ07 [859-872]	1	1749.85	0	0.92	0.878	1.522	1.201	1	1	1	1	86	109.2	93.5	90.9	138.3	82.1	7.8	8.7	9.56	2.9	6.95	5.82		High	High	High	High	High	Not Found	Not Found	Not Found	Not Found	Not Found	Not Found	Not Found
	FALSE	High	[K].GAAAHPDSEEQQQR.[L]	1xTMT6plex [N-Term]		FALSE	6.42043e-06	0	1	2	4	A0A1S5UZ07	A0A1S5UZ07 [893-906]	0	1752.85	0	1.367	0.787	1.987	2.196	1	1	1	1	90	166.3	65.8	75.7	150.4	51.8	7.1	5.02	3.19	10.42	8.48	1.56		Not Found	Not Found	Not Found	Not Found	Not Found	High	High	Not Found	Not Found	Not Found	Not Found	Not Found
	FALSE	High	[K].AQEACGPLEMDSALSVVQNLEK.[D]	1xCarbamidomethyl [C5]; 1xOxidation [M10]; 1xTMT6plex [K22]; 1xTMT6plex [N-Term]		FALSE	5.14251e-07	0	1	2	6	A0A1S5UZ07	A0A1S5UZ07 [1058-1079]	0	2863.46	0	1.848	1.193	1.489	0.95	1	1	1	1	140.7	80.8	76.1	85	126.6	90.8	2.25	0.41	14.35	10.32	18.04	18.93		High	High	Not Found	Not Found	High	Not Found	Not Found	Not Found	Not Found	Not Found	Not Found	Not Found
	FALSE	High	[K].AQEACGPLEMDSALSVVQNLEK.[D]	1xCarbamidomethyl [C5]; 1xOxidation [M10]; 1xTMT6plex [N-Term]		FALSE	2.37455e-05	0	1	2	4	A0A1S5UZ07	A0A1S5UZ07 [1058-1079]	0	2634.3	0	1.627	0.82	2.349	1.383					165.3	73	101.6	52.8	124	83.3								Not Found	Not Found	Not Found	Not Found	Not Found	Not Found	Not Found	Not Found	Not Found	High	Not Found	Not Found
	FALSE	High	[K].APGQLECETAIAALNSCLR.[D]	2xCarbamidomethyl [C7; C17]		FALSE	4.24596e-06	0	1	2	6	A0A1S5UZ07	A0A1S5UZ07 [1672-1690]	0	2074.01	0																					No Quan Labels	Not Found	Not Found	Not Found	Not Found	Not Found	Not Found	Not Found	Not Found	Not Found	Not Found	Not Found	High
	FALSE	High	[K].APGQLECETAIAALNSCLR.[D]	2xCarbamidomethyl [C7; C17]; 1xTMT6plex [N-Term]		FALSE	7.87916e-06	0	1	2	4	A0A1S5UZ07	A0A1S5UZ07 [1672-1690]	0	2303.17	0	1.536	0.58	4.405	2.708	1	1	0.429036	1	94.3	136.4	61.4	50.4	221.9	35.6	2.8	2.72	3.48	27.51	7.43	15.64		Not Found	Not Found	Not Found	Not Found	Not Found	High	High	Not Found	Not Found	Not Found	Not Found	Not Found
	FALSE	High	[K].ASVPTIQDQASAMQLSQCAK.[N]	1xCarbamidomethyl [C18]; 1xOxidation [M13]; 1xTMT6plex [K20]; 1xTMT6plex [N-Term]		FALSE	8.05073e-06	0	1	2	2	A0A1S5UZ07	A0A1S5UZ07 [1023-1042]	0	2608.35	0	2.335	1.506	1.802	1.121					150.6	82.3	64.5	73.4	132.2	97.1								Not Found	Not Found	Not Found	Not Found	High	Not Found	Not Found	Not Found	Not Found	Not Found	Not Found	Not Found
	FALSE	High	[K].ASVPTIQDQASAMQLSQCAK.[N]	1xCarbamidomethyl [C18]; 1xOxidation [M13]; 1xTMT6plex [N-Term]		FALSE	4.66228e-06	0	1	2	4	A0A1S5UZ07	A0A1S5UZ07 [1023-1042]	0	2379.18	0	1.531	1.418	1.762	1.06	1	1	1	1	106.8	90	69.8	84.9	149.5	99	40.04	54.13	1.87	21.01	9.47	10.73		High	Not Found	Not Found	Not Found	High	Not Found	Not Found	Not Found	Not Found	Not Found	Not Found	Not Found
	FALSE	High	[K].VLVQNAAGSQEK.[L]	1xTMT6plex [K12]; 1xTMT6plex [N-Term]		FALSE	7.0095e-05	0	1	2	6	A0A1S5UZ07	A0A1S5UZ07 [2049-2060]	0	1701.99	0	2.019	1.209	2.867	1.648	1	1	1	1	130.3	97.8	64.5	59.3	170.1	78	4.42	15.39	1.07	3	5.02	0.32		Not Found	Not Found	Not Found	Not Found	Not Found	Not Found	Not Found	Not Found	Not Found	High	High	Not Found
	FALSE	High	[K].ASAGPQPLLVQSCK.[A]	1xCarbamidomethyl [C13]; 1xTMT6plex [N-Term]; 1xTMT6plex [K14]		FALSE	2.12768e-05	0	1	2	4	A0A1S5UZ07	A0A1S5UZ07 [961-974]	0	1684.93	0	1.826	1.385	3.032	1.422	1	1	1	1	122.2	83	66.9	58.3	176.9	92.7	1.74	5.05	7.51	1.89	0.83	7.24		Not Found	Not Found	High	High	Not Found	Not Found	Not Found	Not Found	Not Found	Not Found	Not Found	Not Found
	FALSE	High	[K].ASAGPQPLLVQSCK.[A]	1xCarbamidomethyl [C13]; 1xTMT6plex [K14]; 1xTMT6plex [N-Term]		FALSE	9.32686e-06	0	1	2	4	A0A1S5UZ07	A0A1S5UZ07 [961-974]	0	1914.09	0	2.384	1.489	3.155	2.021					136	105.4	57	52.1	164.5	84.9								Not Found	Not Found	Not Found	Not Found	Not Found	Not Found	Not Found	Not Found	Not Found	High	Not Found	Not Found
	FALSE	High	[K].VSQMAQYFEPLTLAAVGAASK.[T]	1xOxidation [M4]		FALSE	4.79839e-06	0	1	2	4	A0A1S5UZ07	A0A1S5UZ07 [1748-1768]	0	2198.12	0																					No Quan Labels	Not Found	Not Found	Not Found	Not Found	Not Found	Not Found	Not Found	Not Found	Not Found	Not Found	Not Found	Not Found
	FALSE	High	[R].IGITNHDEYSLVR.[E]			FALSE	4.49541e-05	0	1	2	4	A0A1S5UZ07	A0A1S5UZ07 [119-131]	0	1516.78	0																					No Quan Labels	Not Found	Not Found	Not Found	Not Found	Not Found	Not Found	Not Found	Not Found	High	Not Found	Not Found	Not Found
	FALSE	High	[K].VSHVLAALQAGNR.[G]	1xTMT6plex [N-Term]		FALSE	1.0275e-05	0	1	2	2	A0A1S5UZ07	A0A1S5UZ07 [1978-1990]	0	1564.91	0	1.478	0.897	3.479	3.473					89.4	172.9	60.5	49.8	173.2	54.3								Not Found	Not Found	Not Found	Not Found	Not Found	Not Found	Not Found	Not Found	Not Found	Not Found	Not Found	High
	FALSE	High	[K].VSHVLAALQAGNR.[G]			FALSE	5.47238e-05	0	1	2	4	A0A1S5UZ07	A0A1S5UZ07 [1978-1990]	0	1335.75	0																					No Quan Labels	Not Found	Not Found	Not Found	Not Found	Not Found	Not Found	Not Found	High	High	Not Found	Not Found	Not Found
	FALSE	High	[K].ALSTDPAAPNLK.[S]	1xTMT6plex [N-Term]		FALSE	3.24697e-05	0	1	2	2	A0A1S5UZ07	A0A1S5UZ07 [1338-1349]	0	1426.81	0	1.681	0.695	2.977	1.27					138.1	78.1	82.1	61.5	183.1	57.1								High	Not Found	Not Found	Not Found	Not Found	Not Found	Not Found	Not Found	Not Found	Not Found	Not Found	Not Found
	FALSE	High	[K].LGAASLGAEDPETQVVLINAVK.[D]			FALSE	1.85471e-06	0	1	2	6	A0A1S5UZ07	A0A1S5UZ07 [2081-2102]	0	2195.19	0																					No Quan Labels	Not Found	Not Found	Not Found	Not Found	Not Found	Not Found	Not Found	Not Found	Not Found	Not Found	Not Found	Not Found
	FALSE	High	[K].LGAASLGAEDPETQVVLINAVK.[D]	1xTMT6plex [K22]; 1xTMT6plex [N-Term]		FALSE	3.74511e-07	0	1	2	6	A0A1S5UZ07	A0A1S5UZ07 [2081-2102]	0	2424.35	0	1.413	0.922	1.716	0.921		1	1	1	105.5	88.8	74.7	96.5	165.6	68.9		13.15	1.86	99.08	34.29	13.82		Not Found	Not Found	Not Found	Not Found	Not Found	High	High	Not Found	Not Found	Not Found	Not Found	Not Found
	FALSE	High	[K].VVAPTISSPVCQEQLVEAGR.[L]	1xCarbamidomethyl [C11]; 1xTMT6plex [N-Term]		FALSE	4.05192e-06	0	1	2	4	A0A1S5UZ07	A0A1S5UZ07 [739-758]	0	2369.27	0	1.57	0.485	5.686	3.188					128	113.3	81.5	35.5	202.1	39.5								Not Found	Not Found	Not Found	Not Found	Not Found	High	Not Found	Not Found	Not Found	Not Found	Not Found	Not Found
	FALSE	High	[K].VVAPTISSPVCQEQLVEAGR.[L]	1xCarbamidomethyl [C11]		FALSE	2.47457e-07	0	1	2	4	A0A1S5UZ07	A0A1S5UZ07 [739-758]	0	2140.11	0																					No Quan Labels	Not Found	Not Found	Not Found	Not Found	Not Found	Not Found	Not Found	Not Found	Not Found	Not Found	Not Found	Not Found
	FALSE	High	[K].RLLSDSLPPSTGTFQEAQSR.[L]	1xPhospho [S]; 1xTMT6plex [N-Term]	A0A1S5UZ07 1xPhospho [S]	FALSE	0.000100186	3.96551e-05	1	2	11	A0A1S5UZ07	A0A1S5UZ07 [1239-1258]	1	2499.24	0	0.442	0.817	0.236	0.39	1	1	1	1	28.1	109.4	63.6	280.7	66.3	51.9	25.8	3.35	7.61	4.58	3.39	13.1		Not Found	High	High	High	Medium	Not Found	Not Found	Not Found	Not Found	Not Found	Not Found	Not Found
	FALSE	High	[K].GLAGAVSELLR.[S]			FALSE	7.7416e-05	3.96551e-05	1	2	2	A0A1S5UZ07	A0A1S5UZ07 [614-624]	0	1085.63	0																					No Quan Labels	Not Found	Not Found	Not Found	Not Found	Not Found	Not Found	Not Found	Not Found	Not Found	Not Found	Not Found	Not Found
	FALSE	High	[K].VMVTNVTSLLK.[T]	1xOxidation [M2]		FALSE	7.7416e-05	3.96551e-05	2	6	4	Q9Y4G6; A0A1S5UZ07	Q9Y4G6 [2121-2131]; A0A1S5UZ07 [2137-2147]	0	1220.69	0																					No Quan Labels	Not Found	High	Not Found	Not Found	Not Found	Not Found	Not Found	Not Found	Not Found	Not Found	Not Found	Not Found
	FALSE	High	[K].VMVTNVTSLLK.[T]	1xOxidation [M2]; 1xTMT6plex [K11]; 1xTMT6plex [N-Term]		FALSE	0.00010909	3.96551e-05	2	6	8	Q9Y4G6; A0A1S5UZ07	Q9Y4G6 [2121-2131]; A0A1S5UZ07 [2137-2147]	0	1679.02	0	2.114	0.837	4.336	2.46	1	1	1	1	118.5	119.4	56.1	48.5	210.5	46.9	43.56	37.8	3.75	20.2	12.75	38.94	Shared	Not Found	High	Not Found	Not Found	Not Found	High	High	Not Found	Not Found	Not Found	Not Found	Not Found
	FALSE	High	[K].ASVPTIQDQASAMQLSQCAK.[N]	1xCarbamidomethyl [C18]		FALSE	8.01529e-05	3.96551e-05	1	2	2	A0A1S5UZ07	A0A1S5UZ07 [1023-1042]	0	2134.03	0																					No Quan Labels	Not Found	Not Found	Not Found	Not Found	Not Found	Not Found	Not Found	Not Found	Not Found	High	Not Found	Not Found
	FALSE	High	[K].DHFGLEGDEESTMLEDSVSPK.[K]	1xOxidation [M13]; 1xTMT6plex [N-Term]; 1xTMT6plex [K21]		FALSE	0.000102889	3.96551e-05	1	2	3	A0A1S5UZ07	A0A1S5UZ07 [407-427]	0	2567.17	0	0.571	0.703	0.84	0.941					59	123.5	103.3	131.2	110.3	72.7								Not Found	Not Found	Not Found	Not Found	Not Found	Not Found	High	Not Found	Not Found	Not Found	Not Found	Not Found
	FALSE	High	[K].DHFGLEGDEESTMLEDSVSPK.[K]	1xOxidation [M13]		FALSE	0.000114906	3.96551e-05	1	2	4	A0A1S5UZ07	A0A1S5UZ07 [407-427]	0	2338	0																					No Quan Labels	Not Found	Not Found	Not Found	Not Found	Not Found	High	High	Not Found	Not Found	Not Found	Not Found	Not Found
	FALSE	High	[K].ALSTDPAAPNLK.[S]			FALSE	9.55096e-05	3.96551e-05	1	2	2	A0A1S5UZ07	A0A1S5UZ07 [1338-1349]	0	1197.65	0																					No Quan Labels	Not Found	Not Found	Not Found	Not Found	Not Found	Not Found	Not Found	Not Found	Not Found	Not Found	Not Found	Not Found
	FALSE	High	[R].VQELGHGCAALVTK.[A]	1xCarbamidomethyl [C8]; 1xTMT6plex [K14]; 1xTMT6plex [N-Term]		FALSE	8.82579e-05	3.96551e-05	1	2	4	A0A1S5UZ07	A0A1S5UZ07 [1937-1950]	0	1711.94	0	1.2	1.029	1.322	0.915	1	1	1	1	112.3	84.2	93.6	92	121.7	96.3	0.59	20.1	13.77	51.5	63.68	40.5		High	Not Found	Not Found	Not Found	High	Not Found	Not Found	Not Found	Not Found	Not Found	Not Found	Not Found
	FALSE	High	[R].VQELGHGCAALVTK.[A]	1xCarbamidomethyl [C8]; 1xTMT6plex [K14]; 1xTMT6plex [N-Term]		FALSE	7.76618e-05	3.96551e-05	1	2	2	A0A1S5UZ07	A0A1S5UZ07 [1937-1950]	0	1941.1	0	1.825	0.952	3.538	2.495					111.5	131	61.1	52.5	185.7	58.2								Not Found	Not Found	Not Found	Not Found	Not Found	Not Found	Not Found	Not Found	Not Found	High	Not Found	Not Found
	FALSE	High	[K].VLGEAMTGISQNAK.[N]	1xOxidation [M6]; 1xTMT6plex [K14]; 1xTMT6plex [N-Term]		FALSE	9.49367e-05	3.96551e-05	1	2	4	A0A1S5UZ07	A0A1S5UZ07 [1419-1432]	0	1893.05	0	1.615	0.913	2.567	1.616	1	1	1	1	116.4	107.8	72.1	66.7	171.2	65.8	24.11	41.38	12.3	12.07	2.32	44.93		Not Found	High	Not Found	Not Found	Not Found	Not Found	Not Found	High	Not Found	Not Found	Not Found	Not Found
	FALSE	High	[K].VLGEAMTGISQNAK.[N]	1xTMT6plex [K14]; 1xTMT6plex [N-Term]		FALSE	9.63738e-05	3.96551e-05	1	2	2	A0A1S5UZ07	A0A1S5UZ07 [1419-1432]	0	1877.06	0	1.587	0.73	2.776	2.286					95	151.4	59.8	66.2	183.9	43.6								Not Found	High	Not Found	Not Found	Not Found	Not Found	Not Found	Not Found	Not Found	Not Found	Not Found	Not Found
	FALSE	High	[K].VLGEAMTGISQNAK.[N]	1xOxidation [M6]		FALSE	9.52228e-05	3.96551e-05	1	2	4	A0A1S5UZ07	A0A1S5UZ07 [1419-1432]	0	1434.73	0																					No Quan Labels	Not Found	Not Found	Not Found	Not Found	Not Found	Not Found	Not Found	Medium	Not Found	Not Found	Not Found	High
	FALSE	High	[K].VGDDPAVWQLK.[N]			FALSE	8.16765e-05	3.96551e-05	1	2	2	A0A1S5UZ07	A0A1S5UZ07 [2122-2132]	0	1227.64	0																					No Quan Labels	Not Found	Not Found	Not Found	Not Found	Not Found	Not Found	Not Found	Not Found	Not Found	Not Found	Not Found	Not Found
	FALSE	High	[K].ACEFAGFQCQIQFGPHNEQK.[H]	2xCarbamidomethyl [C2; C9]		FALSE	0.000110363	3.96551e-05	1	2	2	A0A1S5UZ07	A0A1S5UZ07 [235-254]	0	2396.05	0																					No Quan Labels	Not Found	Not Found	Not Found	Not Found	Not Found	Not Found	Not Found	Not Found	Not Found	Not Found	Not Found	Not Found
	FALSE	High	[R].LLSDSLPPSTGTFQEAQSR.[L]	1xPhospho [S]; 1xTMT6plex [N-Term]	A0A1S5UZ07 1xPhospho [S]	FALSE	9.46512e-05	3.96551e-05	1	2	10	A0A1S5UZ07	A0A1S5UZ07 [1240-1258]	0	2343.14	0	0.31	0.862	0.223	0.355	1	1	0.562489	1	14	112.8	45.2	318.1	70.9	38.9	27.72	8.12	9.3	5.32	4.84	12.71		High	High	High	Not Found	Not Found	Not Found	Not Found	Not Found	Not Found	Not Found	Not Found	High
	FALSE	High	[K].ALDGAFTEENR.[A]	1xTMT6plex [N-Term]		FALSE	8.11662e-05	3.96551e-05	1	2	4	A0A1S5UZ07	A0A1S5UZ07 [1562-1572]	0	1451.73	0	1.129	0.897	1.405	1.306	1	1	1	1	87	129.2	77	98.9	138.9	69.1	15.15	7.77	2.22	3.3	6.46	13.47		Not Found	Not Found	Not Found	Not Found	Not Found	Not Found	Not Found	Not Found	Not Found	Not Found	High	High
	FALSE	High	[K].ADAEGESDLENSRK.[L]	1xTMT6plex [K14]; 1xTMT6plex [N-Term]		FALSE	0.000136808	7.07462e-05	1	2	2	A0A1S5UZ07	A0A1S5UZ07 [859-872]	1	1979.01	0																					No Quan Values	Not Found	Not Found	Not Found	Not Found	Not Found	Not Found	Not Found	Not Found	Not Found	Not Found	Not Found	Not Found
	FALSE	High	[R].ILAQATSDLVNAIK.[A]	1xTMT6plex [K14]		FALSE	0.000125824	7.07462e-05	1	2	4	A0A1S5UZ07	A0A1S5UZ07 [845-858]	0	1686	0	1.617	1.123	0.878	0.361					169.8	33.4	105	92.5	81.3	118								High	Not Found	Not Found	Not Found	Not Found	Not Found	Not Found	Not Found	Not Found	Not Found	Not Found	Not Found
	FALSE	High	[K].VVAPTISSPVCQEQLVEAGR.[L]	1xCarbamidomethyl [C11]; 1xPhospho [S/T]; 1xTMT6plex [N-Term]	A0A1S5UZ07 1xPhospho [S/T]	FALSE	0.000142209	7.07462e-05	1	2	4	A0A1S5UZ07	A0A1S5UZ07 [739-758]	0	2449.24	0	0.474	0.508	0.544	0.468					55.9	85.1	118	182	99	59.9								Not Found	Not Found	Not Found	Not Found	Not Found	Not Found	Not Found	Not Found	Not Found	Not Found	Not Found	High
	FALSE	High	[K].ALGDLISATK.[A]			FALSE	0.000129763	7.07462e-05	1	2	2	A0A1S5UZ07	A0A1S5UZ07 [2107-2116]	0	988.567	0																					No Quan Labels	Not Found	Not Found	Not Found	Not Found	Not Found	Not Found	Not Found	Not Found	Not Found	Not Found	Not Found	Not Found
	FALSE	High	[K].ALDGAFTEENR.[A]			FALSE	0.000122329	7.07462e-05	1	2	4	A0A1S5UZ07	A0A1S5UZ07 [1562-1572]	0	1222.57	0																					No Quan Labels	Not Found	Not Found	Not Found	Not Found	Not Found	Not Found	High	Not Found	Not Found	Not Found	Not Found	Not Found
	FALSE	High	[K].QQLTGHSK.[R]	1xTMT6plex [K8]; 1xTMT6plex [N-Term]		FALSE	0.000125471	7.07462e-05	1	2	4	A0A1S5UZ07	A0A1S5UZ07 [2284-2291]	0	1356.8	0	1.768	0.994	2.776	2.17	1	1	1	1	108.9	134.4	61.6	61.9	172	61.2	3.04	11.01	21.12	12.31	4.11	1.73		Not Found	Not Found	Not Found	Not Found	Not Found	Not Found	High	High	Not Found	Not Found	Not Found	Not Found
	FALSE	High	[R].SAQPASAEPR.[Q]	1xTMT6plex [N-Term]		FALSE	0.00013122	7.07462e-05	1	2	4	A0A1S5UZ07	A0A1S5UZ07 [625-634]	0	1242.66	0	1.676	1.184	2.339	1.53	1	1	1	1	121.8	100.4	72.7	65.6	153.5	86	5.48	12.99	24.58	1.06	16.74	31.94		Not Found	Not Found	Not Found	Not Found	Not Found	Not Found	Not Found	High	High	Not Found	Not Found	Not Found
	FALSE	High	[K].ASAGPQPLLVQSCK.[A]	1xCarbamidomethyl [C13]		FALSE	0.000124067	7.07462e-05	1	2	2	A0A1S5UZ07	A0A1S5UZ07 [961-974]	0	1455.76	0																					No Quan Labels	Not Found	Not Found	Not Found	Not Found	Not Found	Not Found	Not Found	Not Found	Not Found	Not Found	Not Found	Not Found
	FALSE	High	[K].SNTSPEELGPLANQLTSDYGR.[L]			FALSE	0.000141817	7.07462e-05	1	2	2	A0A1S5UZ07	A0A1S5UZ07 [1892-1912]	0	2249.07	0																					No Quan Labels	Not Found	Not Found	Not Found	Not Found	Not Found	Not Found	Not Found	Not Found	Not Found	Not Found	Not Found	Not Found
	FALSE	High	[K].TLSHPQQMALLDQTK.[T]	1xTMT6plex [N-Term]		FALSE	0.000136429	7.07462e-05	1	2	2	A0A1S5UZ07	A0A1S5UZ07 [1769-1783]	0	1940.05	0	1.236	0.571	5.656	3.176					86.3	130.5	69.8	41.1	232.4	39.9								Not Found	Not Found	Not Found	Not Found	Not Found	Not Found	High	Not Found	Not Found	Not Found	Not Found	Not Found
	FALSE	High	[K].STVLQQQYNR.[V]	1xTMT6plex [N-Term]		FALSE	0.000145781	0.000104443	1	2	4	A0A1S5UZ07	A0A1S5UZ07 [429-438]	0	1465.8	0	1.309	0.757	1.466	1.395	1	1	1	1	105.9	127.2	80.9	91.2	133.7	61.2	0.62	5.53	2.93	1.48	4.14	1.84		Not Found	Not Found	Not Found	High	High	Not Found	Not Found	Not Found	Not Found	Not Found	Not Found	Not Found
	FALSE	High	[R].ERIPEAPAGPPSDFGLFLSDDDPKK.[G]	1xTMT6plex [N-Term]		FALSE	0.000172058	0.000118124	1	2	2	A0A1S5UZ07	A0A1S5UZ07 [34-58]	2	2927.5	0	1.028	0.915	1.783	1.643					80.9	136.7	78.7	83.2	148.4	72								Not Found	High	Not Found	Not Found	Not Found	Not Found	Not Found	Not Found	Not Found	Not Found	Not Found	Not Found
	FALSE	High	[K].ADQDSEAMK.[R]	1xTMT6plex [K9]; 1xTMT6plex [N-Term]		FALSE	0.000165019	0.000118124	1	2	2	A0A1S5UZ07	A0A1S5UZ07 [2463-2471]	0	1452.74	0	1.234	0.897	1.322	1.085					118	95.8	95.6	88.3	116.7	85.7								Not Found	Not Found	Not Found	Not Found	Not Found	Not Found	Not Found	High	Not Found	Not Found	Not Found	Not Found
	FALSE	High	[K].ADQDSEAMK.[R]	1xOxidation [M8]; 1xTMT6plex [K9]; 1xTMT6plex [N-Term]		FALSE	0.000165478	0.000118124	1	2	2	A0A1S5UZ07	A0A1S5UZ07 [2463-2471]	0	1468.74	0	1.499	1.116	2	1.088					106.1	91.6	70.8	84.2	168.4	79								Not Found	Not Found	Not Found	Not Found	Not Found	Not Found	High	Not Found	Not Found	Not Found	Not Found	Not Found
	FALSE	High	[R].LQAAGNAVKR.[A]	1xTMT6plex [K9]; 1xTMT6plex [N-Term]		FALSE	0.000160076	0.000118124	2	5	2	Q9Y4G6; A0A1S5UZ07	Q9Y4G6 [2457-2466]; A0A1S5UZ07 [2473-2482]	1	1485.93	0	2.288	1.44	1.87	1.995					143.9	124.1	62.9	62.2	116.4	90.5							Shared	High	Not Found	Not Found	Not Found	Not Found	Not Found	Not Found	Not Found	Not Found	Not Found	Not Found	Not Found
	FALSE	High	[K].ALGDLISATK.[A]	1xTMT6plex [K10]; 1xTMT6plex [N-Term]		FALSE	0.000159196	0.000118124	1	2	4	A0A1S5UZ07	A0A1S5UZ07 [2107-2116]	0	1217.73	1	2.016	1.085	3.819	1.758	1	1	1	1	123.5	93.3	61.2	53	202.5	66.4	11.49	18.48	13.83	4.1	4.21	8.02		Not Found	Not Found	Not Found	Not Found	Not Found	Not Found	High	Not Found	Not Found	Not Found	Not Found	High
	FALSE	High	[K].AHATGAGPAGR.[Y]	1xTMT6plex [N-Term]		FALSE	0.000156156	0.000118124	1	2	2	A0A1S5UZ07	A0A1S5UZ07 [804-814]	0	1194.65	0																					No Quan Values	Not Found	Not Found	Not Found	Not Found	Not Found	Not Found	Not Found	Not Found	Not Found	Not Found	Not Found	Not Found
	FALSE	High	[K].NLGTALAELR.[T]	1xTMT6plex [N-Term]		FALSE	0.000162751	0.000118124	1	2	4	A0A1S5UZ07	A0A1S5UZ07 [1043-1052]	0	1286.76	0	1.507	0.808	2.83	2.211	1	1	1	1	96.1	142.2	63.8	64.3	182	51.6	23.57	10.99	4.56	16.64	6.1	9.11		Not Found	Not Found	Not Found	Not Found	Not Found	Not Found	Not Found	Not Found	High	High	Not Found	Not Found
	FALSE	High	[K].AVAAGNSCR.[Q]	1xCarbamidomethyl [C8]; 1xTMT6plex [N-Term]		FALSE	0.000161854	0.000118124	2	6	5	Q9Y4G6; A0A1S5UZ07	Q9Y4G6 [2190-2198]; A0A1S5UZ07 [2206-2214]	0	1134.59	0	1.666	1.117	4.519	1.051	1	1	1	1	137.1	46.2	82.3	43.9	198.6	91.9	22.71	25.13	10.37	32.81	2.89	8.43	Shared	Not Found	Not Found	Not Found	Not Found	Not Found	Not Found	Not Found	Not Found	Not Found	Not Found	High	High
	FALSE	High	[R].QELAVFCSPEPPAK.[T]	1xCarbamidomethyl [C7]; 1xTMT6plex [N-Term]		FALSE	0.000165019	0.000118124	1	2	2	A0A1S5UZ07	A0A1S5UZ07 [2172-2185]	0	1801.94	0	1.407	0.85	3.358	1.259					111.6	76.6	79.3	60.8	204.3	67.4								Not Found	Not Found	Not Found	High	Not Found	Not Found	Not Found	Not Found	Not Found	Not Found	Not Found	Not Found
	FALSE	High	[R].MATNAAAQNAIK.[K]	1xTMT6plex [N-Term]		FALSE	0.000167326	0.000118124	1	2	2	A0A1S5UZ07	A0A1S5UZ07 [916-927]	0	1432.78	0	1.559	0.915	4.336	1.883					122.3	85.4	78.4	45.4	196.8	71.8								Not Found	High	Not Found	Not Found	Not Found	Not Found	Not Found	Not Found	Not Found	Not Found	Not Found	Not Found
	FALSE	High	[K].DHFGLEGDEESTMLEDSVSPK.[K]			FALSE	0.000152758	0.000118124	1	2	2	A0A1S5UZ07	A0A1S5UZ07 [407-427]	0	2322.01	0																					No Quan Labels	Not Found	Not Found	Not Found	Not Found	Not Found	Not Found	High	Not Found	Not Found	Not Found	Not Found	Not Found
	FALSE	High	[K].VLGEAMTGISQNAK.[N]	1xOxidation [M6]; 1xTMT6plex [N-Term]; 1xTMT6plex [K14]		FALSE	0.000160962	0.000118124	1	2	2	A0A1S5UZ07	A0A1S5UZ07 [1419-1432]	0	1663.89	0	1.402	1.497	1.945	0.668					117.1	50.7	83.5	75.9	147.6	125.1								Not Found	Not Found	Not Found	High	Not Found	Not Found	Not Found	Not Found	Not Found	Not Found	Not Found	Not Found
	FALSE	High	[K].TMQFEPSTMVYDACR.[I]	1xCarbamidomethyl [C14]; 1xOxidation [M]; 1xTMT6plex [N-Term]		FALSE	0.000200431	0.000137039	1	2	5	A0A1S5UZ07	A0A1S5UZ07 [16-30]	0	2080.93	0	1.232	0.773	2.794	1.427	1	1	1	1	111.2	89.9	90.3	63	175.9	69.8	5.34	10.19	3.32	8.49	7.23	10.87		Not Found	High	High	Not Found	Not Found	Not Found	Not Found	Not Found	Not Found	Not Found	Not Found	Not Found
	FALSE	High	[K].NCGQMSEIEAK.[V]	1xCarbamidomethyl [C2]		FALSE	0.000198648	0.000137039	1	2	4	A0A1S5UZ07	A0A1S5UZ07 [285-295]	0	1266.55	0																					No Quan Labels	Not Found	Not Found	Not Found	Not Found	Not Found	Not Found	Not Found	Not Found	Not Found	Not Found	Not Found	Not Found
	FALSE	High	[K].EVIQEWNLTNIK.[R]			FALSE	0.00020593	0.000137039	1	2	2	A0A1S5UZ07	A0A1S5UZ07 [346-357]	0	1486.79	0																					No Quan Labels	Not Found	Not Found	Not Found	Not Found	Not Found	Not Found	Not Found	Not Found	Not Found	Not Found	High	Not Found
	FALSE	High	[RK].RLQAAGNAVK.[R]	1xTMT6plex [K10]; 1xTMT6plex [N-Term]		FALSE	0.000209089	0.000137039	2	5	4	Q9Y4G6; A0A1S5UZ07	Q9Y4G6 [2456-2465]; A0A1S5UZ07 [2472-2481]	1	1485.93	0	2.235	1.318	2.048	1.934	1	1	1	1	144	119	64.4	61.5	126	84.9	6.21	0.72	10.35	0.47	2.63	0.1	Shared	Not Found	Not Found	Not Found	Not Found	Not Found	Not Found	Not Found	Not Found	High	High	Not Found	Not Found
	FALSE	High	[K].DHFGLEGDEESTMLEDSVSPKK.[S]	1xPhospho [S/T]; 1xOxidation [M13]; TMT6plex [K]; 1xTMT6plex [N-Term]	A0A1S5UZ07 1xPhospho [S/T]	FALSE	0.000210374	0.000137039	1	2	13	A0A1S5UZ07	A0A1S5UZ07 [407-428]	1	3004.39	0	0.403	0.363	0.384	0.461	1	1	1	1	63.3	80.5	157.3	174.7	67.1	57.1	15.1	51.13	22.16	5.24	11.48	3.78		Not Found	Not Found	Not Found	Not Found	Not Found	Not Found	High	High	Not Found	Not Found	Not Found	Not Found
	FALSE	High	[K].VLVQNAAGSQEK.[L]	1xPhospho [S9]; 1xTMT6plex [K12]; 1xTMT6plex [N-Term]	A0A1S5UZ07 1xPhospho [S2057]	FALSE	0.000200431	0.000137039	1	2	4	A0A1S5UZ07	A0A1S5UZ07 [2049-2060]	0	1781.96	0	0.509	0.698	0.276	0.216	1	1	1	1	61.7	48.2	121.2	222.8	61.5	84.6	12.2	9.81	12.81	10.54	19.35	8.13		Not Found	Not Found	Not Found	High	High	Not Found	Not Found	Not Found	Not Found	Not Found	Not Found	Not Found
	FALSE	High	[K].SIAAATSALVK.[SA]	1xTMT6plex [N-Term]		FALSE	0.000212984	0.000137039	2	6	2	Q9Y4G6; A0A1S5UZ07	Q9Y4G6 [2352-2362]; A0A1S5UZ07 [2368-2378]	0	1260.77	0	1.3	0.685	1.958	1.64					105.1	127.9	80.9	78	152.7	55.4							Shared	Not Found	Not Found	Not Found	Not Found	Not Found	Not Found	Not Found	Not Found	Not Found	Not Found	Not Found	High
	FALSE	High	[R].IPEAPAGPPSDFGLFLSDDDPKK.[G]	1xTMT6plex [N-Term]		FALSE	0.000447619	0.000146789	1	2	2	A0A1S5UZ07	A0A1S5UZ07 [36-58]	1	2642.36	0	2.113	0.788	4.035	2.211					127	111.5	60.1	50.4	203.6	47.3								Not Found	Not Found	Not Found	Not Found	Not Found	Not Found	High	Not Found	Not Found	Not Found	Not Found	Not Found
	FALSE	High	[K].GIWLEAGK.[A]	1xTMT6plex [K8]; 1xTMT6plex [N-Term]		FALSE	0.000249891	0.000146789	1	2	4	A0A1S5UZ07	A0A1S5UZ07 [59-66]	0	1331.81	0	1.292	1.058	0.856	0.821	1	1	1	1	84.4	116.9	65.4	142.3	121.9	69.2	50.77	9.63	56.51	82.61	35.32	35.59		Not Found	Not Found	High	High	Not Found	Not Found	Not Found	Not Found	Not Found	Not Found	Not Found	Not Found
	FALSE	High	[R].ILAQATSDLVNAIK.[A]	1xTMT6plex [K14]; 1xTMT6plex [N-Term]		FALSE	0.000346225	0.000146789	1	2	2	A0A1S5UZ07	A0A1S5UZ07 [845-858]	0	1915.16	0																					No Quan Values	Not Found	Not Found	Not Found	Not Found	Not Found	Not Found	Not Found	Not Found	Not Found	Not Found	Not Found	Not Found
	FALSE	High	[K].QVAASTAQLLVACK.[V]	1xCarbamidomethyl [C13]; 1xTMT6plex [K14]; 1xTMT6plex [N-Term]		FALSE	0.000360331	0.000146789	2	7	2	Q9Y4G6; A0A1S5UZ07	Q9Y4G6 [2431-2444]; A0A1S5UZ07 [2447-2460]	0	1918.12	0	1.221	0.688	3.148	1.887					86.2	123.4	70.6	65.4	205.8	48.6							Shared	Not Found	Not Found	Not Found	Not Found	Not Found	High	Not Found	Not Found	Not Found	Not Found	Not Found	Not Found
	FALSE	High	[K].NCGQMSEIEAK.[V]	1xCarbamidomethyl [C2]; 1xOxidation [M5]; 1xTMT6plex [N-Term]		FALSE	0.000361958	0.000146789	1	2	2	A0A1S5UZ07	A0A1S5UZ07 [285-295]	0	1511.7	0	1.286	0.857	1.505	1.057					114.8	94.8	89.3	89.7	134.9	76.5								Not Found	Not Found	Not Found	Not Found	Not Found	Not Found	High	Not Found	Not Found	Not Found	Not Found	Not Found
	FALSE	High	[R].QELAVFCSPEPPAK.[T]	1xCarbamidomethyl [C7]; 1xPhospho [S8]; 1xTMT6plex [K14]; 1xTMT6plex [N-Term]	A0A1S5UZ07 1xPhospho [S2179]	FALSE	0.00033303	0.000146789	1	2	2	A0A1S5UZ07	A0A1S5UZ07 [2172-2185]	0	2111.06	0	0.381	0.458	0.416	0.279					62.7	48.9	164.7	175.4	73	75.4								High	Not Found	Not Found	Not Found	Not Found	Not Found	Not Found	Not Found	Not Found	Not Found	Not Found	Not Found
	FALSE	High	[K].TIMVDDSK.[T]	1xTMT6plex [K8]; 1xTMT6plex [N-Term]		FALSE	0.000386093	0.000146789	1	2	4	A0A1S5UZ07	A0A1S5UZ07 [99-106]	0	1366.77	0	1.8	1.106	1.721	1.884	1	1	1	1	109.6	148.2	60.9	78.7	135.3	67.3	13.62	14.02	15.43	30.78	16.39	1.63		Not Found	Not Found	Not Found	High	High	Not Found	Not Found	Not Found	Not Found	Not Found	Not Found	Not Found
	FALSE	High	[K].DHFGLEGDEESTMLEDSVSPKK.[S]	1xPhospho [S]; 1xOxidation [M13]	A0A1S5UZ07 1xPhospho [S]	FALSE	0.000324701	0.000146789	1	2	3	A0A1S5UZ07	A0A1S5UZ07 [407-428]	1	2546.06	0																					No Quan Labels	Not Found	Not Found	Not Found	Not Found	High	Not Found	Not Found	Not Found	Not Found	Not Found	Not Found	Not Found
	FALSE	High	[K].TLSHPQQMALLDQTK.[T]	1xOxidation [M8]; 1xTMT6plex [N-Term]		FALSE	0.000461794	0.000146789	1	2	2	A0A1S5UZ07	A0A1S5UZ07 [1769-1783]	0	1956.04	0	1.954	1.407	1.838	0.724					149.7	54.1	76.6	74.7	137.2	107.8								Not Found	Not Found	High	Not Found	Not Found	Not Found	Not Found	Not Found	Not Found	Not Found	Not Found	Not Found
	FALSE	High	[K].TLSHPQQMALLDQTK.[T]	1xOxidation [M8]; 1xTMT6plex [K15]; 1xTMT6plex [N-Term]		FALSE	0.000239096	0.000146789	1	2	4	A0A1S5UZ07	A0A1S5UZ07 [1769-1783]	0	2185.21	0	1.345	1.23	1.329	1.173	1	1	1	1	103.3	109	76.8	92.9	123.5	94.4	38.37	20.91	37.06	35.65	32.05	5.25		Not Found	Not Found	Not Found	Not Found	Not Found	Not Found	High	Not Found	Not Found	High	Not Found	Not Found
	FALSE	High	[K].SQLAAAAR.[A]	1xTMT6plex [N-Term]		FALSE	0.000347746	0.000146789	1	2	2	A0A1S5UZ07	A0A1S5UZ07 [1350-1357]	0	1016.61	0	2.034	1.283	2.22	1.469					132.2	100.1	65	68.1	151.3	83.3								Not Found	High	Not Found	Not Found	Not Found	Not Found	Not Found	Not Found	Not Found	Not Found	Not Found	Not Found
	FALSE	High	[R].EGTETFADHR.[E]	1xTMT6plex [N-Term]		FALSE	0.000278308	0.000146789	1	2	4	A0A1S5UZ07	A0A1S5UZ07 [2024-2033]	0	1391.68	0	1.86	1.021	2.75	1.939	1	1	1	1	114.8	122.9	61.7	63.4	174.3	63	6.27	6.09	3.81	5.95	1.64	7.24		Not Found	Not Found	Not Found	Not Found	Not Found	Not Found	High	High	Not Found	Not Found	Not Found	Not Found
	FALSE	High	[R].EGTETFADHREGILK.[T]	1xTMT6plex [K15]; 1xTMT6plex [N-Term]		FALSE	0.000246481	0.000146789	1	2	2	A0A1S5UZ07	A0A1S5UZ07 [2024-2038]	1	2161.17	0	1.416	1.205	1.786	1.972					100.8	141.9	71.2	72	128.5	85.7								Not Found	Not Found	Not Found	Not Found	Not Found	Not Found	Not Found	Not Found	Not Found	Not Found	Not Found	High
	FALSE	High	[K].STVLQQQYNR.[V]			FALSE	0.000393482	0.000146789	1	2	2	A0A1S5UZ07	A0A1S5UZ07 [429-438]	0	1236.63	0																					No Quan Labels	Not Found	Not Found	Not Found	Not Found	Not Found	Not Found	Not Found	Not Found	Not Found	Not Found	Not Found	Not Found
	FALSE	High	[R].AAMEPIVISAK.[T]	1xOxidation [M3]; 1xTMT6plex [N-Term]		FALSE	0.000343217	0.000146789	1	2	4	A0A1S5UZ07	A0A1S5UZ07 [1611-1621]	0	1374.79	0	2.036	1.464	1.829	0.752	1	1	1	1	153.5	54.7	75.4	72.8	133.2	110.4	12.4	19.28	3.59	24.35	12.43	3.94		Not Found	Not Found	Not Found	Not Found	Not Found	Not Found	Not Found	Not Found	Not Found	Not Found	High	High
	FALSE	High	[R].AAMEPIVISAK.[T]	1xOxidation [M3]; 1xTMT6plex [K11]; 1xTMT6plex [N-Term]		FALSE	0.000397263	0.000146789	1	2	6	A0A1S5UZ07	A0A1S5UZ07 [1611-1621]	0	1603.95	0	2.092	1.284	1.91	1.096	1	1	1	1	151.5	77.5	72.4	70.7	134.9	93	11.48	27.33	3.43	6.76	13.47	7.37		Not Found	Not Found	Not Found	Not Found	Medium	High	Not Found	Not Found	Not Found	Not Found	Not Found	Not Found
	FALSE	High	[K].VLVQNAAGSQEK.[L]			FALSE	0.000277271	0.000146789	1	2	3	A0A1S5UZ07	A0A1S5UZ07 [2049-2060]	0	1243.66	0																					No Quan Labels	Not Found	Not Found	Not Found	Not Found	Not Found	Not Found	Medium	High	Not Found	Not Found	Not Found	Not Found
	FALSE	High	[K].VMVTNVTSLLK.[T]			FALSE	0.00025696	0.000146789	2	6	2	Q9Y4G6; A0A1S5UZ07	Q9Y4G6 [2121-2131]; A0A1S5UZ07 [2137-2147]	0	1204.7	0																					No Quan Labels	Not Found	Not Found	Not Found	Not Found	Not Found	Not Found	Not Found	Not Found	Not Found	Not Found	Not Found	Not Found
	FALSE	High	[K].VMVTNVTSLLK.[T]	1xOxidation [M2]; 1xTMT6plex [N-Term]		FALSE	0.000425465	0.000146789	2	6	2	Q9Y4G6; A0A1S5UZ07	Q9Y4G6 [2121-2131]; A0A1S5UZ07 [2137-2147]	0	1449.85	0	1.994	1.307	3.13	1.247					122.5	77.9	61.4	62.4	195.4	80.3							Shared	High	Not Found	Not Found	Not Found	Not Found	Not Found	Not Found	Not Found	Not Found	Not Found	Not Found	Not Found
	FALSE	High	[R].AQVVSNLK.[G]	1xTMT6plex [K8]; 1xTMT6plex [N-Term]		FALSE	0.000261556	0.000146789	1	2	4	A0A1S5UZ07	A0A1S5UZ07 [1316-1323]	0	1316.83	0	2.222	1.323	2.481	1.5	1	1	1	1	140.9	93.9	63.4	62.6	155.3	83.9	16.63	3.91	9.45	25.1	7.98	26.2		High	Not Found	Not Found	Not Found	Not Found	Not Found	Not Found	Not Found	Not Found	Not Found	Not Found	High
	FALSE	High	[K].AVEDEATK.[G]	1xTMT6plex [K8]; 1xTMT6plex [N-Term]		FALSE	0.000274201	0.000146789	1	2	2	A0A1S5UZ07	A0A1S5UZ07 [2151-2158]	0	1320.74	0	1.77	1.25	2.998	1.835					116.2	105.7	65.7	57.6	172.7	82.1								Not Found	Not Found	Not Found	Not Found	Not Found	Not Found	Not Found	High	Not Found	Not Found	Not Found	Not Found
	FALSE	High	[K].VGDDPAVWQLK.[N]	1xTMT6plex [K11]; 1xTMT6plex [N-Term]		FALSE	0.000283594	0.000146789	1	2	6	A0A1S5UZ07	A0A1S5UZ07 [2122-2132]	0	1456.8	0	1.556	1.124	2.869	1.303	1	1	1	1	118.9	80.3	76.4	61.6	176.9	85.9	16.02	7.98	10.51	42.83	13.42	12.4		Not Found	High	High	High	Not Found	Not Found	Not Found	Not Found	Not Found	Not Found	Not Found	Not Found
	FALSE	High	[K].VLGEAMTGISQNAK.[N]	1xTMT6plex [N-Term]		FALSE	0.000283594	0.000146789	1	2	2	A0A1S5UZ07	A0A1S5UZ07 [1419-1432]	0	1647.89	0	1.665	0.666	3.25	1.767					101.2	116.8	60.8	66.1	214.7	40.5								Not Found	Not Found	Not Found	Not Found	Not Found	Not Found	Not Found	Not Found	Not Found	Not Found	High	Not Found
	FALSE	High	[R].SGASGPENFQVGSMPPAQQQITSGQMHR.[G]	1xOxidation [M14]		FALSE	0.000322004	0.000146789	1	2	2	A0A1S5UZ07	A0A1S5UZ07 [455-482]	0	2943.35	0																					No Quan Labels	Not Found	Not Found	Not Found	Not Found	Not Found	Not Found	Not Found	Not Found	Not Found	Not Found	Not Found	Not Found
	FALSE	High	[R].SGASGPENFQVGSMPPAQQQITSGQMHR.[G]	2xOxidation [M14; M26]		FALSE	0.000292425	0.000146789	1	2	2	A0A1S5UZ07	A0A1S5UZ07 [455-482]	0	2959.34	0																					No Quan Labels	Not Found	Not Found	Not Found	Not Found	Not Found	Not Found	Not Found	High	Not Found	Not Found	Not Found	Not Found
	FALSE	High	[K].ISIGNVVK.[T]	1xTMT6plex [K8]; 1xTMT6plex [N-Term]		FALSE	0.000719323	0.000151834	1	2	2	A0A1S5UZ07	A0A1S5UZ07 [8-15]	0	1287.84	0	1.732	0.982	2.705	1.67					118.4	107.6	68.4	64.4	174.2	67.1								Not Found	Not Found	Not Found	Not Found	High	Not Found	Not Found	Not Found	Not Found	Not Found	Not Found	Not Found
	FALSE	High	[K].AVASAAAALVLK.[A]			FALSE	0.000544188	0.000151834	1	2	2	A0A1S5UZ07	A0A1S5UZ07 [691-702]	0	1084.67	0																					No Quan Labels	Not Found	Not Found	Not Found	Not Found	Not Found	Not Found	Not Found	Not Found	Not Found	Not Found	Not Found	Not Found
	FALSE	High	[R].AVTDSINQLITMCTQQAPGQK.[E]	1xCarbamidomethyl [C13]; 1xOxidation [M12]; 1xTMT6plex [N-Term]		FALSE	0.000597397	0.000151834	1	2	2	A0A1S5UZ07	A0A1S5UZ07 [1358-1378]	0	2549.29	0	1.139	0.713	1.913	0.935					77.7	98.5	68.2	105.4	201.6	48.7								Not Found	Not Found	Not Found	High	Not Found	Not Found	Not Found	Not Found	Not Found	Not Found	Not Found	Not Found
	FALSE	High	[K].ADQDSEAMK.[R]	1xOxidation [M8]; 1xTMT6plex [N-Term]		FALSE	0.000738145	0.000151834	1	2	7	A0A1S5UZ07	A0A1S5UZ07 [2463-2471]	0	1239.57	0	1.176	1.007	1.903	0.949	1	1	1	1	109.1	75.1	92.8	79.1	150.5	93.4	21.63	20.76	14.37	16.65	28.35	25.26		Medium	High	High	High	Not Found	Not Found	Not Found	Not Found	Not Found	Not Found	Not Found	Not Found
	FALSE	High	[K].AAGHPGDPESQQR.[L]	1xTMT6plex [N-Term]		FALSE	0.000492315	0.000151834	1	2	4	A0A1S5UZ07	A0A1S5UZ07 [1189-1201]	0	1578.78	0	1.578	1.047	2.735	2.344	1	1	1	1	101.8	141.1	64.5	60.2	164.7	67.6	12.81	7.7	10.57	2.56	3.3	1.08		Not Found	Not Found	Not Found	Not Found	Not Found	Not Found	High	High	Not Found	Not Found	Not Found	Not Found
	FALSE	High	[K].GITMATAK.[A]	1xTMT6plex [K8]; 1xTMT6plex [N-Term]		FALSE	0.000538031	0.000151834	2	6	4	Q9Y4G6; A0A1S5UZ07	Q9Y4G6 [2182-2189]; A0A1S5UZ07 [2198-2205]	0	1250.75	0	1.776	1.218	2.841	1.969	1	1	0.469142	1	123	109.6	69.3	55.7	158.1	84.3	1.28	15	4.16	29.91	19.73	34.16	Shared	High	Not Found	Not Found	Not Found	Not Found	Not Found	Not Found	Not Found	Not Found	Not Found	Not Found	High
	FALSE	High	[K].EAAYHPEVAPDVR.[L]			FALSE	0.000547306	0.000151834	1	2	2	A0A1S5UZ07	A0A1S5UZ07 [2238-2250]	0	1453.71	0																					No Quan Labels	Not Found	Not Found	Not Found	Not Found	Not Found	High	Not Found	Not Found	Not Found	Not Found	Not Found	Not Found
	FALSE	High	[K].AIAVTVQEMVTK.[S]	1xTMT6plex [N-Term]		FALSE	0.000505951	0.000151834	1	2	2	A0A1S5UZ07	A0A1S5UZ07 [1880-1891]	0	1518.88	0			2.605	1.646						188.1		114.3	297.7									Not Found	Not Found	Not Found	Not Found	Not Found	Not Found	Not Found	Not Found	Not Found	Not Found	Not Found	Not Found
	FALSE	High	[K].ILADATAK.[M]	1xTMT6plex [K8]; 1xTMT6plex [N-Term]		FALSE	0.000526022	0.000151834	1	2	4	A0A1S5UZ07	A0A1S5UZ07 [879-886]	0	1260.79	0	2.193	1.347	2.875	1.631	1	1	1	1	138.3	92.9	63.1	57	163.8	84.9	12.19	21.69	0.37	16.98	8.64	0.86		Not Found	Not Found	Not Found	Not Found	Not Found	Not Found	Not Found	Not Found	Not Found	Not Found	High	High
	FALSE	High	[K].GISMSSSK.[L]	1xTMT6plex [N-Term]		FALSE	0.000934919	0.000163068	1	2	4	A0A1S5UZ07	A0A1S5UZ07 [1324-1331]	0	1025.55	0	1.906	1.115	2.965	1.567	1	1	1	1	128.3	93.3	67.3	59.5	176.5	75	8.1	2.24	0.63	5.38	0.34	11		Not Found	Not Found	High	High	Not Found	Not Found	Not Found	Not Found	Not Found	Not Found	Not Found	Not Found
	FALSE	High	[K].GISMSSSK.[L]	1xTMT6plex [K8]; 1xTMT6plex [N-Term]		FALSE	0.000826042	0.000163068	1	2	2	A0A1S5UZ07	A0A1S5UZ07 [1324-1331]	0	1254.71	0	1.177	1.166	1.554	1.082					98.1	95.6	83.4	88.4	137.3	97.2								Not Found	Not Found	Not Found	Not Found	Not Found	Not Found	Not Found	Not Found	Not Found	Not Found	High	Not Found
	FALSE	High	[K].RLLSDSLPPSTGTFQEAQSR.[L]	1xTMT6plex [N-Term]		FALSE	0.000809547	0.000163068	1	2	2	A0A1S5UZ07	A0A1S5UZ07 [1239-1258]	1	2419.28	0	1.381	0.256	2.545	2.043					103.2	147.3	74.7	72.1	183.5	19.1								Not Found	Not Found	Not Found	Not Found	Not Found	Not Found	Not Found	Not Found	Not Found	High	Not Found	Not Found
	FALSE	High	[K].ASSLIEEAKK.[A]	1xTMT6plex [N-Term]		FALSE	0.000809547	0.000163068	1	2	2	A0A1S5UZ07	A0A1S5UZ07 [1179-1188]	1	1304.76	0	3.303	2.42	2.017	1.596					169.8	88	51.4	55.1	111.2	124.4								High	Not Found	Not Found	Not Found	Not Found	Not Found	Not Found	Not Found	Not Found	Not Found	Not Found	Not Found
	FALSE	High	[R].EGTETFADHR.[E]			FALSE	0.000814996	0.000163068	1	2	2	A0A1S5UZ07	A0A1S5UZ07 [2024-2033]	0	1162.51	0																					No Quan Labels	High	Not Found	Not Found	Not Found	Not Found	Not Found	Not Found	Not Found	Not Found	Not Found	Not Found	Not Found
	FALSE	High	[K].ADQDSEAMK.[R]	1xTMT6plex [N-Term]; 1xTMT6plex [K9]		FALSE	0.00078823	0.000163068	1	2	8	A0A1S5UZ07	A0A1S5UZ07 [2463-2471]	0	1223.58	0	1.254	0.935	2.056	1.225	1	1	1	1	104.5	95.6	83.3	78.1	160.5	78	4.52	5.28	2.99	1.72	0.73	4.71		Not Found	High	Not Found	High	High	Not Found	Not Found	Not Found	Not Found	Not Found	Not Found	Not Found
	FALSE	High	[K].QQLTGHSK.[R]	1xTMT6plex [N-Term]		FALSE	0.000896648	0.000163068	1	2	2	A0A1S5UZ07	A0A1S5UZ07 [2284-2291]	0	1127.64	0	1.571	1.34	2.087	1.317					99.1	105.7	63.1	80.2	167.4	84.5								Not Found	Not Found	Not Found	Not Found	Not Found	Not Found	Not Found	Not Found	Not Found	Not Found	Not Found	High
	FALSE	High	[R].CVSCLPGQR.[D]	2xCarbamidomethyl [C1; C4]; 1xTMT6plex [N-Term]		FALSE	0.000921931	0.000163068	1	2	4	A0A1S5UZ07	A0A1S5UZ07 [1216-1224]	0	1305.66	0	1.628	1.15	2.896	1.612	1	1	1	1	118.9	94.9	73	58.8	170.4	84	4.49	1.24	4.12	5.65	0.04	15.3		Not Found	Not Found	High	High	Not Found	Not Found	Not Found	Not Found	Not Found	Not Found	Not Found	Not Found
	FALSE	High	[R].LQAAGNAVK.[R]	1xTMT6plex [K9]; 1xTMT6plex [N-Term]		FALSE	0.000934919	0.000163068	2	5	2	Q9Y4G6; A0A1S5UZ07	Q9Y4G6 [2457-2465]; A0A1S5UZ07 [2473-2481]	0	1329.83	0	1.711	1.242	3.181	1.657					90.9	110.7	53.1	66.8	212.5	66							Shared	Not Found	Not Found	Not Found	Not Found	Not Found	Not Found	Not Found	Not Found	Not Found	Not Found	High	Not Found
	FALSE	High	[K].VLGEAMTGISQNAK.[N]			FALSE	0.00113543	0.000173014	1	2	1	A0A1S5UZ07	A0A1S5UZ07 [1419-1432]	0	1418.73	0																					No Quan Labels	Not Found	Not Found	Not Found	Not Found	Not Found	Not Found	Not Found	Not Found	Not Found	Not Found	Not Found	High
	FALSE	High	[R].AAMEPIVISAK.[T]	1xOxidation [M3]		FALSE	0.00108653	0.000173014	1	2	2	A0A1S5UZ07	A0A1S5UZ07 [1611-1621]	0	1145.62	0																					No Quan Labels	Not Found	Not Found	Not Found	Not Found	Not Found	Not Found	Not Found	Not Found	Not Found	Not Found	Not Found	Not Found
	FALSE	High	[R].AAMEPIVISAK.[T]	1xTMT6plex [K11]		FALSE	0.00115232	0.000173014	1	2	2	A0A1S5UZ07	A0A1S5UZ07 [1611-1621]	0	1358.79	0	1.186	1.027	3.72	2.148					82	118.2	69.1	55	204.7	71								Not Found	High	Not Found	Not Found	Not Found	Not Found	Not Found	Not Found	Not Found	Not Found	Not Found	Not Found
	FALSE	High	[K].EVIQEWNLTNIK.[R]	1xTMT6plex [K12]; 1xTMT6plex [N-Term]		FALSE	0.000968439	0.000173014	1	2	4	A0A1S5UZ07	A0A1S5UZ07 [346-357]	0	1945.12	0	1.272	0.642	2.362	1.905					101.5	132.9	79.8	69.8	164.8	51.2								Not Found	Not Found	Not Found	Not Found	Not Found	Not Found	Not Found	Not Found	Not Found	Not Found	High	Not Found
	FALSE	High	[K].NGNLPEFGDAISTASK.[A]	1xTMT6plex [K16]; 1xTMT6plex [N-Term]		FALSE	0.00120489	0.000173014	1	2	2	A0A1S5UZ07	A0A1S5UZ07 [1433-1448]	0	2079.11	0	1.305	0.774	3.167	2.964					77.7	173.2	59.5	58.4	185	46.1								Not Found	Not Found	Not Found	Not Found	Not Found	Not Found	High	Not Found	Not Found	Not Found	Not Found	Not Found
	FALSE	High	[R].QELAVFCSPEPPAK.[T]	1xCarbamidomethyl [C7]; 1xTMT6plex [K14]; 1xTMT6plex [N-Term]		FALSE	0.00103275	0.000173014	1	2	2	A0A1S5UZ07	A0A1S5UZ07 [2172-2185]	0	2031.1	0	1.993	1.092	3.817	2.287					114.8	117.4	57.6	51.3	195.9	62.9								Not Found	Not Found	Not Found	Not Found	Not Found	Not Found	High	Not Found	Not Found	Not Found	Not Found	Not Found
	FALSE	High	[K].SIAAATSALVK.[SA]			FALSE	0.00112709	0.000173014	2	6	2	Q9Y4G6; A0A1S5UZ07	Q9Y4G6 [2352-2362]; A0A1S5UZ07 [2368-2378]	0	1031.61	0																					No Quan Labels	Not Found	Not Found	Not Found	Not Found	Not Found	Not Found	Not Found	Not Found	Not Found	Not Found	Not Found	Not Found
	FALSE	High	[K].ILADATAK.[M]	1xTMT6plex [K8]; 1xTMT6plex [N-Term]		FALSE	0.0010945	0.000173014	1	2	4	A0A1S5UZ07	A0A1S5UZ07 [879-886]	0	1031.63	0	2.133	1.286	3.064	1.433	1	1	1	1	133.1	84.6	62.4	59	180.7	80.2	0.98	0.86	5.16	11.15	12.4	21.07		High	Not Found	Not Found	Not Found	Not Found	High	Not Found	Not Found	Not Found	Not Found	Not Found	Not Found
	FALSE	High	[K].EVANSTANLVK.[T]			FALSE	0.00111065	0.000173014	2	6	2	Q9Y4G6; A0A1S5UZ07	Q9Y4G6 [1533-1543]; A0A1S5UZ07 [1548-1558]	0	1145.62	0																					No Quan Labels	Not Found	Not Found	Not Found	Not Found	Not Found	Not Found	High	Not Found	Not Found	Not Found	Not Found	Not Found
	FALSE	High	[K].AVAEQIPLLVQGVR.[G]	1xTMT6plex [N-Term]		FALSE	0.00135979	0.000184814	1	2	2	A0A1S5UZ07	A0A1S5UZ07 [975-988]	0	1722.05	0	1.765	1.588	4.393	3.32					70.3	162.5	39.9	48.9	215	63.3								Not Found	High	Not Found	Not Found	Not Found	Not Found	Not Found	Not Found	Not Found	Not Found	Not Found	Not Found
	FALSE	High	[K].ASVPTIQDQASAMQLSQCAK.[N]	1xCarbamidomethyl [C18]; 1xOxidation [M13]		FALSE	0.00133919	0.000184814	1	2	2	A0A1S5UZ07	A0A1S5UZ07 [1023-1042]	0	2150.02	0																					No Quan Labels	Not Found	Not Found	Not Found	Not Found	Not Found	Not Found	Not Found	High	Not Found	Not Found	Not Found	Not Found
	FALSE	High	[K].VMVTNVTSLLK.[T]	1xPhospho [T/S]; 1xOxidation [M2]	Q9Y4G6 1xPhospho [S/T]; A0A1S5UZ07 1xPhospho [S/T]	FALSE	0.00150311	0.000198786	2	6	3	Q9Y4G6; A0A1S5UZ07	Q9Y4G6 [2121-2131]; A0A1S5UZ07 [2137-2147]	0	1300.66	0																					No Quan Labels	Not Found	Not Found	Not Found	Not Found	Not Found	Not Found	Not Found	Not Found	Not Found	Not Found	Not Found	High
	FALSE	High	[K].AGALQCSPSDAYTK.[K]	1xCarbamidomethyl [C6]		FALSE	0.00143489	0.000198786	1	2	2	A0A1S5UZ07	A0A1S5UZ07 [1951-1964]	0	1468.67	0																					No Quan Labels	Not Found	Not Found	Not Found	Not Found	Not Found	Not Found	High	Not Found	Not Found	Not Found	Not Found	Not Found
	FALSE	High	[K].GISMSSSK.[L]	1xOxidation [M4]; 1xTMT6plex [N-Term]		FALSE	0.00165101	0.00022864	1	2	3	A0A1S5UZ07	A0A1S5UZ07 [1324-1331]	0	1041.54	0	1.69	1.406	2.422	0.787	1	1	1	1	130.2	53.2	77.1	67.6	163.6	108.3	11.87	15.43	11.58	13.14	9.9	20.23		Not Found	Not Found	Not Found	Not Found	Not Found	Not Found	Not Found	Not Found	Not Found	Not Found	High	Medium
	FALSE	High	[K].EAAYHPEVAPDVR.[L]	1xTMT6plex [N-Term]		FALSE	0.00173107	0.000242745	1	2	4	A0A1S5UZ07	A0A1S5UZ07 [2238-2250]	0	1682.87	0	2.017	1.273	3.086	1.814					122.1	104.7	60.5	57.7	178	77								Not Found	Not Found	Not Found	Not Found	Not Found	Not Found	Not Found	High	High	Not Found	Not Found	Not Found
	FALSE	High	[K].ALSTDPAAPNLK.[S]	1xTMT6plex [K12]; 1xTMT6plex [N-Term]		FALSE	0.00169051	0.000242745	1	2	6	A0A1S5UZ07	A0A1S5UZ07 [1338-1349]	0	1655.97	0	2.341	1.28	3.384	1.894	1	1	1	1	138.2	98.7	59.1	52.1	176.3	75.6	9.01	7.56	3.78	25.31	8.8	6.5		Not Found	Not Found	Not Found	Not Found	Not Found	Not Found	High	High	Not Found	Not Found	Not Found	Not Found
	FALSE	High	[K].ALDYYMLR.[N]			FALSE	0.00177272	0.000242745	1	2	2	A0A1S5UZ07	A0A1S5UZ07 [67-74]	0	1044.52	0																					No Quan Labels	Not Found	Not Found	Not Found	Not Found	Not Found	Not Found	Not Found	Not Found	Not Found	Not Found	Not Found	Not Found
	FALSE	High	[K].EEITGTLRK.[D]	1xTMT6plex [N-Term]		FALSE	0.00182999	0.00028858	1	2	2	A0A1S5UZ07	A0A1S5UZ07 [139-147]	1	1275.75	0	1.453	1.006	3.038	1.398					120.4	80.6	82.8	57.7	175.2	83.3								Not Found	Not Found	Not Found	Not Found	Not Found	Not Found	Not Found	Not Found	Not Found	Not Found	Not Found	High
	FALSE	High	[K].SIAAATSALVK.[SA]	1xTMT6plex [K11]; 1xTMT6plex [N-Term]		FALSE	0.00203058	0.000298236	2	6	2	Q9Y4G6; A0A1S5UZ07	Q9Y4G6 [2352-2362]; A0A1S5UZ07 [2368-2378]	0	1489.94	0	1.996	1.149	2.99	1.784					103.3	119.1	51.8	66.8	199.6	59.5							Shared	Not Found	Not Found	Not Found	Not Found	Not Found	High	Not Found	Not Found	Not Found	Not Found	Not Found	Not Found
	FALSE	High	[R].LQAAGNAVK.[R]	1xTMT6plex [N-Term]; 1xTMT6plex [K9]		FALSE	0.00195073	0.000298236	2	5	3	Q9Y4G6; A0A1S5UZ07	Q9Y4G6 [2457-2465]; A0A1S5UZ07 [2473-2481]	0	1100.66	0	1.809	1.933	1.572	0.525	1	1	1	1	153	33.7	84.6	64.3	101	163.5	46.36	114.65	41.53	32.94	111.01	79.43	Shared	Not Found	Not Found	Not Found	High	Not Found	Not Found	Not Found	Not Found	Not Found	Not Found	Medium	Not Found
	FALSE	High	[R].AQVVSNLK.[G]	1xTMT6plex [N-Term]		FALSE	0.00190446	0.000298236	1	2	4	A0A1S5UZ07	A0A1S5UZ07 [1316-1323]	0	1087.67	0	1.958	1.313	3.119	1.257	1	1	1	1	129.4	74.3	66.1	59.1	184.3	86.8	2.68	6.83	7.35	12.26	2.92	1.56		Not Found	Not Found	Not Found	High	High	Not Found	Not Found	Not Found	Not Found	Not Found	Not Found	Not Found
	FALSE	High	[K].DHFGLEGDEESTMLEDSVSPK.[K]	1xPhospho [S19]; 1xOxidation [M13]	A0A1S5UZ07 1xPhospho [S425]	FALSE	0.00201433	0.000298236	1	2	2	A0A1S5UZ07	A0A1S5UZ07 [407-427]	0	2417.97	0																					No Quan Labels	Not Found	Not Found	Not Found	Not Found	High	Not Found	Not Found	Not Found	Not Found	Not Found	Not Found	Not Found
	FALSE	High	[R].MVAAATNNLCEAANAAVQGHASQEK.[L]	1xCarbamidomethyl [C10]		FALSE	0.00221892	0.000308191	1	2	2	A0A1S5UZ07	A0A1S5UZ07 [2416-2440]	0	2556.19	0																					No Quan Labels	Not Found	Not Found	Not Found	Not Found	Not Found	Not Found	Not Found	Not Found	Not Found	Not Found	Not Found	Not Found
	FALSE	High	[K].ASSLIEEAK.[K]	1xPhospho [S]; 1xTMT6plex [K9]; 1xTMT6plex [N-Term]	A0A1S5UZ07 1xPhospho [S]	FALSE	0.00260993	0.00031951	1	2	3	A0A1S5UZ07	A0A1S5UZ07 [1179-1187]	0	1485.8	0	0.525	0.657	0.409	0.469					55.6	92	106	196.4	80.3	69.7								Not Found	Not Found	Not Found	Not Found	Not Found	Not Found	Not Found	Not Found	High	Not Found	Not Found	Not Found
	FALSE	High	[R].LLSDSLPPSTGTFQEAQSR.[L]	1xPhospho [S3]	A0A1S5UZ07 1xPhospho [S1242]	FALSE	0.00278542	0.000332126	1	2	2	A0A1S5UZ07	A0A1S5UZ07 [1240-1258]	0	2113.98	0																					No Quan Labels	Not Found	Not Found	Not Found	Not Found	Not Found	Not Found	Not Found	Not Found	Not Found	Not Found	Not Found	Not Found
	FALSE	High	[K].TIMVDDSK.[T]	1xTMT6plex [N-Term]		FALSE	0.00276285	0.000332126	1	2	2	A0A1S5UZ07	A0A1S5UZ07 [99-106]	0	1137.6	0	1.602	0.882	3.242	1.77					123.6	97.5	77.1	55.1	178.6	68								High	Not Found	Not Found	Not Found	Not Found	Not Found	Not Found	Not Found	Not Found	Not Found	Not Found	Not Found
	FALSE	High	[K].KEEITGTLR.[K]	1xTMT6plex [K1]; 1xTMT6plex [N-Term]		FALSE	0.00309585	0.000369931	1	2	2	A0A1S5UZ07	A0A1S5UZ07 [138-146]	1	1504.91	0	1.943	1.298	2.49	2.094	1	1	1	1	112.3	133.1	57.8	63.6	158.3	75	5.55	18.51	19.62	5.81	0.11	14.19		Not Found	Not Found	Not Found	Not Found	Not Found	Not Found	Not Found	High	Medium	Not Found	Not Found	Not Found
	FALSE	High	[K].AVTQALNR.[C]	1xTMT6plex [N-Term]		FALSE	0.00343953	0.000451581	1	2	4	A0A1S5UZ07	A0A1S5UZ07 [1208-1215]	0	1101.66	0	1.454	1.071	1.663	1.16	1	1	1	1	116.5	96.4	80.1	83.1	138.2	85.8	11.02	16.42	26.28	17.87	15.04	15.42		Not Found	Not Found	Not Found	High	High	Not Found	Not Found	Not Found	Not Found	Not Found	Not Found	Not Found
	FALSE	High	[K].LKPLPGETMEK.[C]	1xOxidation [M9]; 1xTMT6plex [K2]; 1xTMT6plex [N-Term]		FALSE	0.003698	0.000461636	1	2	3	A0A1S5UZ07	A0A1S5UZ07 [1093-1103]	0	1487.83	0	1.773	1.455	2.433	1.172					136.5	69.9	77	59.6	145	112								Not Found	Not Found	Not Found	High	Not Found	Not Found	Not Found	Not Found	Not Found	Not Found	Not Found	Not Found
	FALSE	High	[K].VEHGSVALPAIMR.[S]			FALSE	0.00372778	0.000461636	1	2	2	A0A1S5UZ07	A0A1S5UZ07 [442-454]	0	1379.75	0																					No Quan Labels	Not Found	Not Found	Not Found	Not Found	Not Found	Not Found	Not Found	Not Found	Not Found	Not Found	Not Found	High
	FALSE	High	[RK].RLQAAGNAVK.[R]	1xTMT6plex [N-Term]		FALSE	0.0039424	0.000472911	2	5	2	Q9Y4G6; A0A1S5UZ07	Q9Y4G6 [2456-2465]; A0A1S5UZ07 [2472-2481]	1	1256.76	0	1.898	1.102	2.865	1.714					156.5	83	82.4	48.4	138.8	90.9							Shared	High	Not Found	Not Found	Not Found	Not Found	Not Found	Not Found	Not Found	Not Found	Not Found	Not Found	Not Found
	FALSE	High	[K].AVEDEATK.[G]	1xTMT6plex [N-Term]		FALSE	0.00433564	0.000579757	1	2	14	A0A1S5UZ07	A0A1S5UZ07 [2151-2158]	0	1091.58	0	1.622	1.279	2.784	1.229	1	1	1	1	119.8	76.4	73.9	62.2	173.2	94.5	5.16	5.21	9.23	7.27	3.28	7.23		High	High	High	High	High	High	Not Found	Not Found	Not Found	Not Found	Not Found	Not Found
	FALSE	High	[R].ELVAQGK.[V]	1xTMT6plex [K7]; 1xTMT6plex [N-Term]		FALSE	0.00510313	0.000742452	2	6	4	Q9Y4G6; A0A1S5UZ07	Q9Y4G6 [2370-2376]; A0A1S5UZ07 [2386-2392]	0	1202.75	0	1.514	1.451	1.38	1.229	1	1	1	1	95.4	119.2	63	97	133.9	91.4	26.07	17.82	8.45	35.98	39.44	30.06	Shared	Not Found	Not Found	Not Found	Not Found	High	High	Not Found	Not Found	Not Found	Not Found	Not Found	Not Found
	FALSE	High	[K].GITMATAK.[A]	1xOxidation [M4]; 1xTMT6plex [N-Term]		FALSE	0.00518168	0.000742452	2	6	4	Q9Y4G6; A0A1S5UZ07	Q9Y4G6 [2182-2189]; A0A1S5UZ07 [2198-2205]	0	1037.59	0	1.645	1.301	2.5	0.847	1	1	1	1	130.9	55.7	79.6	65.8	164.4	103.6	9.14	1.1	11.97	10.37	2.37	1.09	Shared	High	Not Found	Not Found	Not Found	High	Not Found	Not Found	Not Found	Not Found	Not Found	Not Found	Not Found
	FALSE	High	[K].QVAASTAQLLVACK.[V]	1xCarbamidomethyl [C13]; 1xTMT6plex [N-Term]		FALSE	0.00546435	0.00077844	2	7	2	Q9Y4G6; A0A1S5UZ07	Q9Y4G6 [2431-2444]; A0A1S5UZ07 [2447-2460]	0	1688.96	0	0.982	0.862	2.184	0.969					82	84.6	83.5	87.3	190.6	72							Shared	High	Not Found	Not Found	Not Found	Not Found	Not Found	Not Found	Not Found	Not Found	Not Found	Not Found	Not Found
	FALSE	High	[K].TMLESAGGLIQTAR.[A]	1xOxidation [M2]; 1xTMT6plex [N-Term]		FALSE	0.00546435	0.00077844	1	2	6	A0A1S5UZ07	A0A1S5UZ07 [1622-1635]	0	1692.92	0	1.238	0.737	2.793	1.542	1	1	1	1	96.5	106.4	77.9	69	192.7	57.4	56.88	57.45	17.41	29.4	28.79	47.94		High	Not Found	Not Found	Not Found	High	Not Found	Not Found	Not Found	Not Found	Not Found	Not Found	Not Found
	FALSE	High	[K].ALDYYMLR.[N]	1xTMT6plex [N-Term]		FALSE	0.00558924	0.000788564	1	2	2	A0A1S5UZ07	A0A1S5UZ07 [67-74]	0	1273.68	0	1.285	0.413	5.862	4.132					77.2	164.6	60.1	39.8	233.5	24.8								Not Found	Not Found	Not Found	Not Found	Not Found	Not Found	Not Found	Not Found	Not Found	Not Found	High	Not Found
	FALSE	High	[K].AVTQALNR.[C]			FALSE	0.00558924	0.000788564	1	2	2	A0A1S5UZ07	A0A1S5UZ07 [1208-1215]	0	872.495	0																					No Quan Labels	Not Found	Not Found	Not Found	Not Found	Not Found	Not Found	Not Found	High	Not Found	Not Found	Not Found	Not Found
	FALSE	High	[R].LNEAAAGLNQAATELVQASRGTPQDLAR.[A]	1xPhospho [S/T]	A0A1S5UZ07 1xPhospho [S/T]	FALSE	0.00593352	0.000807689	1	2	2	A0A1S5UZ07	A0A1S5UZ07 [1259-1286]	1	2945.45	0																					No Quan Labels	Not Found	Not Found	Not Found	Not Found	Not Found	Not Found	Not Found	Not Found	Not Found	Not Found	Not Found	Not Found
	FALSE	High	[K].LKPLPGETMEK.[C]	1xOxidation [M9]		FALSE	0.00571642	0.000807689	1	2	2	A0A1S5UZ07	A0A1S5UZ07 [1093-1103]	0	1258.67	0																					No Quan Labels	Not Found	Not Found	Not Found	Not Found	Not Found	Not Found	High	Not Found	Not Found	Not Found	Not Found	Not Found
	FALSE	High	[K].VLVEDTK.[V]	1xTMT6plex [K7]; 1xTMT6plex [N-Term]		FALSE	0.00602219	0.000807689	1	2	4	A0A1S5UZ07	A0A1S5UZ07 [2042-2048]	0	1032.61	0	1.314	0.981	1.482	0.741	1	1	1	1	127.3	64.6	96.8	87.2	129.2	95	15.17	27.23	33.95	65.75	46.57	2.58		Not Found	Not Found	Not Found	Not Found	Not Found	Not Found	Not Found	Not Found	High	Not Found	Not Found	High
	FALSE	High	[K].VLVQNAAGSQEK.[L]	1xPhospho [S9]; 1xTMT6plex [N-Term]	A0A1S5UZ07 1xPhospho [S2057]	FALSE	0.00662441	0.000941673	1	2	4	A0A1S5UZ07	A0A1S5UZ07 [2049-2060]	0	1552.79	0	0.422	0.604	0.38	0.191	0.858825	1	0.356692	0.0577849	63.6	35.9	150.6	187.7	71.3	90.9	3.76	6.46	5	1.96	1.32	13.38		Not Found	High	High	Not Found	Not Found	Not Found	Not Found	Not Found	Not Found	Not Found	Not Found	Not Found
	FALSE	High	[R].DVDNALR.[A]	1xTMT6plex [N-Term]		FALSE	0.00662441	0.000941673	1	2	4	A0A1S5UZ07	A0A1S5UZ07 [1225-1231]	0	1031.57	0	1.133	0.922	1.079	1.858	1	1	1	1	74.5	188.3	65.7	101.4	109.4	60.6	0.11	4.17	10.56	1.13	10.4	15.49		Not Found	Not Found	Not Found	Not Found	Not Found	Not Found	Not Found	High	High	Not Found	Not Found	Not Found
	FALSE	High	[K].TSTPEDFIR.[M]	1xTMT6plex [N-Term]		FALSE	0.00657647	0.000941673	1	2	2	A0A1S5UZ07	A0A1S5UZ07 [2186-2194]	0	1294.68	0	1.966	1.515	2.274	1.587					120.8	106	61.4	66.8	151.9	93.1								Not Found	Not Found	Not Found	Not Found	Not Found	Not Found	Not Found	Not Found	Not Found	Not Found	High	Not Found
	FALSE	High	[R].MLDGTVK.[T]	1xTMT6plex [K7]; 1xTMT6plex [N-Term]		FALSE	0.00727338	0.0010717	1	2	4	A0A1S5UZ07	A0A1S5UZ07 [92-98]	0	1221.73	0	2.186	1.255	2.548	2.229	1	1	1	1	126.9	132	58	59.2	151	72.8	11.69	5.63	1.58	25.84	14.73	20.6		Not Found	Not Found	Not Found	Not Found	Not Found	Not Found	Not Found	Not Found	High	High	Not Found	Not Found
	FALSE	High	[R].IGITNHDEYSLVR.[E]	1xTMT6plex [N-Term]		FALSE	0.00748297	0.0011177	1	2	4	A0A1S5UZ07	A0A1S5UZ07 [119-131]	0	1745.94	0	1.435	0.776	2.799	2.096	1	1	1	1	104.4	130.2	72.8	62.1	173.9	56.5	12.26	11.56	7.71	2.97	23.61	30.21		Not Found	Not Found	Not Found	Not Found	Not Found	High	High	Not Found	Not Found	Not Found	Not Found	Not Found
	FALSE	High	[K].AASAAQR.[E]	1xTMT6plex [N-Term]		FALSE	0.00758958	0.00114202	1	2	2	A0A1S5UZ07	A0A1S5UZ07 [2379-2385]	0	903.521	0	1.778	1.634	2.854	0.526					155.4	25.7	87.4	48.9	139.7	142.8								Not Found	Not Found	Not Found	Not Found	Not Found	Not Found	Not Found	Not Found	High	Not Found	Not Found	Not Found
	FALSE	High	[R].ELVAQGK.[V]	1xTMT6plex [N-Term]		FALSE	0.00758958	0.00114202	2	6	2	Q9Y4G6; A0A1S5UZ07	Q9Y4G6 [2370-2376]; A0A1S5UZ07 [2386-2392]	0	973.588	0	2.012	1.264	2.894	1.366					138.2	79.5	68.7	58.2	168.5	86.8							Shared	Not Found	Not Found	Not Found	Not Found	Not Found	Not Found	Not Found	Not Found	Not Found	Not Found	Not Found	High
	FALSE	High	[K].AAAFEEQENETVVVK.[E]	1xTMT6plex [K15]; 1xTMT6plex [N-Term]		FALSE	0.00764334	0.00116283	1	2	2	A0A1S5UZ07	A0A1S5UZ07 [2494-2508]	0	2122.14	0	1.288	1.174	1.436	1.049					96.5	102.5	74.9	97.8	140.3	88								Not Found	Not Found	Not Found	Not Found	Not Found	Not Found	Not Found	Not Found	Not Found	Not Found	High	Not Found
	FALSE	High	[K].LKPLPGETMEK.[C]	1xTMT6plex [K2]; 1xTMT6plex [N-Term]		FALSE	0.0080284	0.00119604	1	2	2	A0A1S5UZ07	A0A1S5UZ07 [1093-1103]	0	1701	0	1.114	0.942	3.208	2.04					92.1	113.4	82.7	55.6	178.3	77.9								Not Found	High	Not Found	Not Found	Not Found	Not Found	Not Found	Not Found	Not Found	Not Found	Not Found	Not Found
	FALSE	High	[K].NGNLPEFGDAISTASK.[A]			FALSE	0.00808467	0.00122069	1	2	2	A0A1S5UZ07	A0A1S5UZ07 [1433-1448]	0	1620.79	0																					No Quan Labels	Not Found	Not Found	Not Found	Not Found	Not Found	Not Found	Not Found	Not Found	High	Not Found	Not Found	Not Found
	FALSE	High	[R].AVTDSINQLITMCTQQAPGQK.[E]	1xCarbamidomethyl [C13]; 1xTMT6plex [K21]; 1xTMT6plex [N-Term]		FALSE	0.00890729	0.00132809	1	2	2	A0A1S5UZ07	A0A1S5UZ07 [1358-1378]	0	2762.46	0	0.291	0.646	4.931	5.722					12.2	254.6	42	44.5	219.4	27.2								Not Found	Not Found	Not Found	Not Found	Not Found	Not Found	Not Found	High	Not Found	Not Found	Not Found	Not Found
	FALSE	High	[R].AEASQLGHK.[V]	1xTMT6plex [K9]; 1xTMT6plex [N-Term]		FALSE	0.00940805	0.00144007	1	3	3	A0A1S5UZ07	A0A1S5UZ07 [1739-1747]	0	1398.81	0	1.715	0.843	2.879	1.398					137.1	83.6	80	59.8	172.1	67.4								Not Found	Not Found	Not Found	High	Not Found	Not Found	Not Found	Not Found	Not Found	Not Found	Not Found	Not Found
	FALSE	High	[K].TLSHPQQMALLDQTK.[T]	1xTMT6plex [K15]; 1xTMT6plex [N-Term]		FALSE	0.00966739	0.00148146	1	2	4	A0A1S5UZ07	A0A1S5UZ07 [1769-1783]	0	2169.21	0	1.02	0.661	1.634	1.302	1	1	1	1	81.7	127.5	80.1	97.9	160	52.9	0.61	3.6	9.85	17.58	11.46	9.18		Not Found	Not Found	Not Found	Not Found	Not Found	Not Found	Not Found	Not Found	Not Found	High	High	Not Found
	FALSE	High	[K].MVGGIAQIIAAQEEMLRK.[E]	2xOxidation [M1; M15]		FALSE	0.00966739	0.00148146	1	2	1	A0A1S5UZ07	A0A1S5UZ07 [2511-2528]	1	1990.05	0																					No Quan Labels	Not Found	Not Found	Not Found	Not Found	Not Found	Not Found	Not Found	Not Found	Not Found	Not Found	Not Found	Not Found
	FALSE	High	[RK].ELIECAR.[AR]	1xCarbamidomethyl [C5]; 1xTMT6plex [N-Term]		FALSE	0.0100682	0.00151696	2	6	2	Q9Y4G6; A0A1S5UZ07	Q9Y4G6 [1950-1956]; A0A1S5UZ07 [1966-1972]	0	1119.6	0	2.274	1.504	3.785	2.003					148.4	85	65.3	42.5	160.7	98.2							Shared	Not Found	Not Found	Not Found	Not Found	Not Found	Not Found	Not Found	Not Found	Not Found	Not Found	High	Not Found
	FALSE	High	[K].RASDNLVK.[A]	1xTMT6plex [K8]; 1xTMT6plex [N-Term]		FALSE	0.0108423	0.0016254	1	2	4	A0A1S5UZ07	A0A1S5UZ07 [2482-2489]	1	1360.83	0	2.051	1.579	1.829	2.009	1	1	1	1	131.8	125.6	64.3	62.5	114.3	101.5	4.83	7.95	8.51	4.15	7.57	7.79		Not Found	Not Found	Not Found	High	High	Not Found	Not Found	Not Found	Not Found	Not Found	Not Found	Not Found
	FALSE	High	[K].ASSLIEEAK.[K]			FALSE	0.0108423	0.0016254	1	2	4	A0A1S5UZ07	A0A1S5UZ07 [1179-1187]	0	947.504	0																					No Quan Labels	Not Found	Not Found	Not Found	Not Found	Not Found	High	Not Found	Not Found	Not Found	Not Found	Not Found	Not Found
	FALSE	High	[R].SLAQAAR.[G]	1xTMT6plex [N-Term]		FALSE	0.0109154	0.00167052	1	2	2	A0A1S5UZ07	A0A1S5UZ07 [1147-1153]	0	945.568	0	1.97	1.315	2.291	1.609					134.1	101.2	68.1	62.9	144.1	89.5								Not Found	High	Not Found	Not Found	Not Found	Not Found	Not Found	Not Found	Not Found	Not Found	Not Found	Not Found
	FALSE	High	[K].TIMVDDSK.[T]			FALSE	0.0112122	0.00170083	1	2	2	A0A1S5UZ07	A0A1S5UZ07 [99-106]	0	908.439	0																					No Quan Labels	Not Found	Not Found	Not Found	Not Found	Not Found	Not Found	Not Found	Not Found	Not Found	Not Found	Not Found	Not Found
	FALSE	High	[K].ASSLIEEAK.[K]	1xTMT6plex [K9]; 1xTMT6plex [N-Term]		FALSE	0.0112875	0.00173487	1	2	2	A0A1S5UZ07	A0A1S5UZ07 [1179-1187]	0	1405.83	0	1.684	0.949	1.996	1.583					118.3	119.2	70.2	75.3	150.3	66.6								Not Found	Not Found	High	Not Found	Not Found	Not Found	Not Found	Not Found	Not Found	Not Found	Not Found	Not Found
	FALSE	High	[R].TVSDSIK.[K]	1xTMT6plex [K7]; 1xTMT6plex [N-Term]		FALSE	0.0114398	0.00177698	1	2	4	A0A1S5UZ07	A0A1S5UZ07 [1656-1662]	0	1207.73	0	1.578	1.168	2.261	1.361	1	1	1	1	116.3	95.4	73.7	70.1	158.5	86	6.92	10.22	15.7	20.85	10.56	13.79		Not Found	Not Found	Not Found	High	High	Not Found	Not Found	Not Found	Not Found	Not Found	Not Found	Not Found
	FALSE	High	[R].AIADMLR.[A]	1xTMT6plex [N-Term]		FALSE	0.0130783	0.0019729	1	2	2	A0A1S5UZ07	A0A1S5UZ07 [2228-2234]	0	1018.59	0	1.27	0.705	5.205	3.044					83.2	133.3	65.5	43.8	227.9	46.2								Not Found	Not Found	Not Found	Not Found	Not Found	Not Found	Not Found	Not Found	Not Found	Not Found	Not Found	High
	FALSE	High	[K].VLVEDTK.[V]	1xTMT6plex [K7]; 1xTMT6plex [N-Term]		FALSE	0.0141762	0.00208495	1	2	4	A0A1S5UZ07	A0A1S5UZ07 [2042-2048]	0	1261.78	0	1.772	1.018	2.422	1.58	1	1	1	1	133.2	99.6	75.1	63	152.6	76.5	2.88	9.99	8.58	16.94	12.41	11.19		Not Found	Not Found	Not Found	High	High	Not Found	Not Found	Not Found	Not Found	Not Found	Not Found	Not Found
	FALSE	High	[R].GTPQDLAR.[A]			FALSE	0.014564	0.00213612	1	2	4	A0A1S5UZ07	A0A1S5UZ07 [1279-1286]	0	857.448	0																					No Quan Labels	Not Found	Not Found	Not Found	Not Found	High	High	Not Found	Not Found	Not Found	Not Found	Not Found	Not Found
	FALSE	High	[R].EQGVEEHETLLLR.[R]	1xTMT6plex [N-Term]		FALSE	0.0146627	0.00214023	1	2	2	A0A1S5UZ07	A0A1S5UZ07 [182-194]	0	1781.96	0	1.139	0.797	2.516	2.392					90.2	148.8	79.2	62.2	156.5	63.1								Not Found	Not Found	Not Found	Not Found	Not Found	Not Found	Not Found	High	Not Found	Not Found	Not Found	Not Found
	FALSE	High	[K].AQEACGPLEMDSALSVVQNLEK.[D]	1xCarbamidomethyl [C5]; 1xOxidation [M10]		FALSE	0.0171501	0.00244475	1	2	2	A0A1S5UZ07	A0A1S5UZ07 [1058-1079]	0	2405.13	0																					No Quan Labels	Not Found	Not Found	Not Found	Not Found	Not Found	Not Found	Not Found	Not Found	Not Found	Not Found	Not Found	Not Found
	FALSE	High	[K].AGFLDLK.[D]	1xTMT6plex [K7]; 1xTMT6plex [N-Term]		FALSE	0.0176278	0.00250134	1	2	2	A0A1S5UZ07	A0A1S5UZ07 [257-263]	0	1221.76	0																					No Quan Values	Not Found	Not Found	Not Found	High	Not Found	Not Found	Not Found	Not Found	Not Found	Not Found	Not Found	Not Found
	FALSE	High	[R].EAAEGLR.[VM]	1xTMT6plex [N-Term]		FALSE	0.0176278	0.00250134	2	3	4	Q9Y4G6; A0A1S5UZ07	Q9Y4G6 [895-901]; A0A1S5UZ07 [909-915]	0	974.547	0	2.27	1.347	2.539	1.775	1	1	1	1	120.8	118.3	53.2	66.7	169.3	71.7	2.31	0.07	20.42	20.42	3.46	0.28	Shared	Not Found	Not Found	Not Found	Not Found	Not Found	Not Found	High	High	Not Found	Not Found	Not Found	Not Found
	FALSE	High	[RK].ELIECAR.[AR]	1xCarbamidomethyl [C5]		FALSE	0.0178719	0.00252956	2	6	2	Q9Y4G6; A0A1S5UZ07	Q9Y4G6 [1950-1956]; A0A1S5UZ07 [1966-1972]	0	890.44	0																					No Quan Labels	Not Found	Not Found	Not Found	Not Found	Not Found	Not Found	Not Found	Not Found	Not Found	Not Found	Not Found	Not Found
	FALSE	High	[R].DVAGGLR.[S]	1xTMT6plex [N-Term]		FALSE	0.0178719	0.00252956	1	2	4	A0A1S5UZ07	A0A1S5UZ07 [1140-1146]	0	916.541	0	1.242	0.842	1.373	1.654	1	1	1	1	103.3	141	83.2	85.3	117.1	70	10.23	10.84	13.39	8.09	13.27	2.91		Not Found	Medium	Medium	Not Found	Not Found	Not Found	Not Found	Not Found	Not Found	Not Found	Not Found	High
	FALSE	High	[R].QFVQSAK.[E]	1xTMT6plex [N-Term]		FALSE	0.0181197	0.00254588	1	2	2	A0A1S5UZ07	A0A1S5UZ07 [1541-1547]	0	1036.6	0	1.482	2.618	18.11	2.035					37.2	45.4	25.1	22.3	404.2	65.8								Not Found	Not Found	Not Found	Not Found	High	Not Found	Not Found	Not Found	Not Found	Not Found	Not Found	Not Found
	FALSE	High	[K].ECDNALRELETVR.[E]	1xCarbamidomethyl [C2]; 1xTMT6plex [N-Term]		FALSE	0.0200986	0.00285675	1	2	2	A0A1S5UZ07	A0A1S5UZ07 [1379-1391]	1	1833.93	0	1.7	1.137	2.312	2.069					111	134.4	65.3	65	150.2	74.2								Not Found	Not Found	Not Found	Not Found	Not Found	Not Found	Not Found	High	Not Found	Not Found	Not Found	Not Found
	FALSE	High	[K].DHFGLEGDEESTMLEDSVSPKK.[S]	1xPhospho [S19]; TMT6plex [K]; 1xTMT6plex [N-Term]	A0A1S5UZ07 1xPhospho [S425]	FALSE	0.0224753	0.00328738	1	2	2	A0A1S5UZ07	A0A1S5UZ07 [407-428]	1	2988.39	0	0.325	0.389	1.069	0.393					66.6	39.6	205.1	100.9	107.9	79.8								Not Found	Not Found	Not Found	Not Found	Not Found	Not Found	Not Found	High	Not Found	Not Found	Not Found	Not Found
	FALSE	High	[K].TIMVDDSK.[T]	1xOxidation [M3]; 1xTMT6plex [N-Term]		FALSE	0.0224753	0.00328738	1	2	3	A0A1S5UZ07	A0A1S5UZ07 [99-106]	0	1153.6	0	1.246	1.242	1.458	0.87	1	1	1	1	113	74.1	90.7	85.2	124.2	112.7	8.85	0.81	13.98	6.75	23.94	19.59		Medium	Not Found	Not Found	Not Found	Not Found	Not Found	Not Found	Not Found	Not Found	High	Not Found	Not Found
	FALSE	High	[R].GTPQDLAR.[A]	1xTMT6plex [N-Term]		FALSE	0.0246531	0.003534	1	2	4	A0A1S5UZ07	A0A1S5UZ07 [1279-1286]	0	1086.61	0	2.133	1.342	2.735	1.665	1	1	1	1	132.6	99.2	62.2	59.6	163	83.4	4.37	8.16	11.2	3.09	1.28	3.58		Not Found	Not Found	Not Found	Not Found	Not Found	Not Found	Not Found	Not Found	Not Found	High	High	Not Found
	FALSE	High	[R].TTNPTAK.[R]	1xTMT6plex [K7]; 1xTMT6plex [N-Term]		FALSE	0.0250108	0.00359135	1	2	4	A0A1S5UZ07	A0A1S5UZ07 [1533-1539]	0	1190.71	0	1.759	1.275	2.866	0.691	1	1	0.851423	1	147.1	39.8	83.6	57.6	165.2	106.6	10.26	31.37	1.22	15.27	10.11	8.6		Not Found	Not Found	Not Found	High	High	Not Found	Not Found	Not Found	Not Found	Not Found	Not Found	Not Found
	FALSE	High	[K].LLAALLEDEGGSGRPLLQAAK.[G]			FALSE	0.0251921	0.00361634	1	2	2	A0A1S5UZ07	A0A1S5UZ07 [593-613]	0	2122.19	0																					No Quan Labels	Not Found	Not Found	Not Found	Not Found	Not Found	Not Found	Not Found	Not Found	Not Found	Not Found	Not Found	Not Found
	FALSE	High	[K].ALDYYMLR.[N]	1xOxidation [M6]		FALSE	0.0255596	0.0036236	1	2	2	A0A1S5UZ07	A0A1S5UZ07 [67-74]	0	1060.51	0																					No Quan Labels	Not Found	Not Found	Not Found	Not Found	Not Found	Not Found	Not Found	Not Found	Not Found	Not Found	Not Found	Not Found
	FALSE	High	[R].TTNPTAK.[R]	1xTMT6plex [N-Term]		FALSE	0.0272989	0.00371645	1	2	4	A0A1S5UZ07	A0A1S5UZ07 [1533-1539]	0	961.552	0	1.817	1.137	4.419	0.558	1	1	1	1	149.1	25.7	82.1	46.1	203.7	93.3	5.22	31.85	1	35.68	12.45	9.28		Not Found	Not Found	Not Found	Not Found	Not Found	Not Found	Not Found	Not Found	High	High	Not Found	Not Found
	FALSE	High	[R].AVGDASK.[R]	1xTMT6plex [K7]; 1xTMT6plex [N-Term]		FALSE	0.0307686	0.00402911	1	2	2	A0A1S5UZ07	A0A1S5UZ07 [1232-1238]	0	1105.66	0	1.159	1.182	2.235	0.369					131.3	22.7	113.3	61.5	137.4	133.9								Not Found	High	Not Found	Not Found	Not Found	Not Found	Not Found	Not Found	Not Found	Not Found	Not Found	Not Found
	FALSE	High	[R].MLDGTVK.[T]	1xTMT6plex [N-Term]		FALSE	0.031003	0.00405504	1	2	2	A0A1S5UZ07	A0A1S5UZ07 [92-98]	0	992.565	0	1.897	1.345	3.756	1.711					120.5	87.5	63.5	51.1	192.1	85.4								Not Found	Not Found	Not Found	High	Not Found	Not Found	Not Found	Not Found	Not Found	Not Found	Not Found	Not Found
	FALSE	High	[K].GITMATAK.[A]	1xTMT6plex [N-Term]		FALSE	0.0322083	0.00423757	2	6	2	Q9Y4G6; A0A1S5UZ07	Q9Y4G6 [2182-2189]; A0A1S5UZ07 [2198-2205]	0	1021.59	0	1.768	1.296	4.048	2.033					108	101	61.1	49.7	201.1	79.1							Shared	Not Found	Not Found	Not Found	Not Found	High	Not Found	Not Found	Not Found	Not Found	Not Found	Not Found	Not Found
	FALSE	High	[R].ASDNLVK.[A]	1xTMT6plex [K7]; 1xTMT6plex [N-Term]		FALSE	0.0332141	0.00427681	1	2	2	A0A1S5UZ07	A0A1S5UZ07 [2483-2489]	0	1204.73	0	1.175	1.085	2.419	1.525					77.3	118.9	65.8	78	188.6	71.4								Not Found	Not Found	High	Not Found	Not Found	Not Found	Not Found	Not Found	Not Found	Not Found	Not Found	Not Found
	FALSE	High	[K].IFQAHK.[N]	1xTMT6plex [K6]; 1xTMT6plex [N-Term]		FALSE	0.0356186	0.00454632	1	2	1	A0A1S5UZ07	A0A1S5UZ07 [279-284]	0	1201.75	0	2.27	1.14	3.2	2.362					125.3	128.3	55.2	54.3	173.9	63								Not Found	Not Found	Not Found	Not Found	Not Found	Not Found	High	Not Found	Not Found	Not Found	Not Found	Not Found
	FALSE	High	[K].FLPSELRDEH.[-]	1xTMT6plex [N-Term]		FALSE	0.037631	0.0047782	1	2	4	A0A1S5UZ07	A0A1S5UZ07 [2549-2558]	1	1471.77	0	1.326	0.682	1.556	1.697	1	1	1	1	100.3	148.6	75.7	87.6	136.2	51.6	0.1	1.85	4.7	15.11	16.38	5.71		Not Found	Not Found	Not Found	Not Found	High	High	Not Found	Not Found	Not Found	Not Found	Not Found	Not Found
	FALSE	High	[K].VLVEDTK.[V]			FALSE	0.0420545	0.00504084	1	2	4	A0A1S5UZ07	A0A1S5UZ07 [2042-2048]	0	803.451	0																					No Quan Labels	Not Found	Not Found	Not Found	Not Found	Not Found	Not Found	Not Found	Not Found	Not Found	Not Found	Not Found	Not Found
	FALSE	High	[K].RWAASPK.[S]	1xTMT6plex [K7]; 1xTMT6plex [N-Term]		FALSE	0.0437704	0.00519905	2	3	2	Q9Y4G6; A0A1S5UZ07	Q9Y4G6 [361-367]; A0A1S5UZ07 [358-364]	1	1273.78	0	1.857	1.072	1.495	1.737					139.8	124.8	75.3	71.9	107.4	80.7							Shared	Not Found	High	Not Found	Not Found	Not Found	Not Found	Not Found	Not Found	Not Found	Not Found	Not Found	Not Found
	FALSE	High	[K].EEITGTLRK.[D]	1xTMT6plex [K9]; 1xTMT6plex [N-Term]		FALSE	0.0441225	0.00525479	1	2	4	A0A1S5UZ07	A0A1S5UZ07 [139-147]	1	1504.91	0	1.895	1.215	3.067	2.261	1	1	1	1	117.1	123.6	61.8	54.7	167.7	75.1	6.3	3.83	6.42	11.71	11.78	26.2		Not Found	Not Found	Not Found	Not Found	Not Found	High	Medium	Not Found	Not Found	Not Found	Not Found	Not Found
	FALSE	High	[K].ISIGNVVK.[T]	1xTMT6plex [N-Term]		FALSE	0.0478123	0.00565945	1	2	2	A0A1S5UZ07	A0A1S5UZ07 [8-15]	0	1058.68	0	1.77	0.992	3.879	1.641					121.1	86.2	68.4	52.5	203.8	67.9								Not Found	Not Found	Not Found	Not Found	Not Found	Not Found	Not Found	Not Found	Not Found	Not Found	High	Not Found
	FALSE	High	[R].AQVVSNLK.[G]			FALSE	0.0485877	0.00572883	1	2	2	A0A1S5UZ07	A0A1S5UZ07 [1316-1323]	0	858.504	0																					No Quan Labels	Not Found	Not Found	Not Found	Not Found	Not Found	Not Found	Not Found	Not Found	Not Found	Not Found	Not Found	Not Found
	FALSE	High	[K].DHFGLEGDEESTMLEDSVSPKK.[S]	1xPhospho [S]	A0A1S5UZ07 1xPhospho [S]	FALSE	0.050177	0.00590426	1	2	3	A0A1S5UZ07	A0A1S5UZ07 [407-428]	1	2530.07	0																					No Quan Labels	Not Found	Not Found	Not Found	Not Found	Not Found	Not Found	Not Found	Not Found	Not Found	Not Found	Not Found	Not Found
	FALSE	High	[K].GIWLEAGK.[A]			FALSE	0.0518179	0.00610891	1	2	2	A0A1S5UZ07	A0A1S5UZ07 [59-66]	0	873.483	0																					No Quan Labels	Not Found	Not Found	Not Found	Not Found	Not Found	Not Found	Not Found	Not Found	Not Found	High	Not Found	Not Found
	FALSE	High	[R].RAIADMLR.[A]	1xOxidation [M6]		FALSE	0.0522363	0.00614144	1	2	2	A0A1S5UZ07	A0A1S5UZ07 [2227-2234]	1	961.525	0																					No Quan Labels	Not Found	Not Found	Not Found	Not Found	Not Found	Not Found	High	Not Found	Not Found	Not Found	Not Found	Not Found
	FALSE	High	[K].TIMVDDSK.[T]	1xOxidation [M3]; 1xTMT6plex [K8]; 1xTMT6plex [N-Term]		FALSE	0.0593841	0.00693631	1	2	5	A0A1S5UZ07	A0A1S5UZ07 [99-106]	0	1382.76	0	1.772	1.238	1.572	1.005	1	1	1	1	124.7	89.3	70.4	88.8	139.6	87.2	7.32	26.74	10.01	11.84	10.59	18.45		Not Found	High	High	Not Found	High	Not Found	Not Found	Not Found	Not Found	Not Found	Not Found	Not Found
	FALSE	High	[K].RLLSDSLPPSTGTFQEAQSR.[L]	1xPhospho [S/T]	A0A1S5UZ07 1xPhospho [S]	FALSE	0.0632839	0.00728489	1	2	4	A0A1S5UZ07	A0A1S5UZ07 [1239-1258]	1	2270.08	0																					No Quan Labels	Not Found	Not Found	Not Found	Not Found	Not Found	Not Found	Not Found	High	High	Not Found	Not Found	Not Found
	FALSE	High	[K].KEEITGTLRK.[D]	1xTMT6plex [K1]; 1xTMT6plex [N-Term]		FALSE	0.0701082	0.00790471	1	2	4	A0A1S5UZ07	A0A1S5UZ07 [138-147]	2	1403.84	0	0.722	1.122	0.946	1.971					62.6	177.8	86.7	90.2	85.4	97.3								Not Found	Not Found	Not Found	Not Found	Not Found	Not Found	Not Found	Not Found	Not Found	Not Found	High	Not Found
	FALSE	High	[K].GIWLEAGK.[A]	1xTMT6plex [N-Term]		FALSE	0.0717727	0.00807446	1	2	2	A0A1S5UZ07	A0A1S5UZ07 [59-66]	0	1102.65	0	1.008	0.652	1.677	0.868					105.1	79	104.2	91.1	152.7	67.9								Not Found	Not Found	Not Found	Not Found	Not Found	Not Found	Not Found	Not Found	Not Found	Not Found	High	Not Found
	FALSE	High	[K].ERELEEAR.[K]	1xTMT6plex [N-Term]		FALSE	0.0793946	0.00872622	2	7	2	Q9Y4G6; A0A1S5UZ07	Q9Y4G6 [2512-2519]; A0A1S5UZ07 [2529-2536]	1	1260.67	0	1.461	0.936	1.534	1.793					97.9	154.3	67	86	132	62.7							Shared	Not Found	Not Found	Not Found	Not Found	Not Found	High	Not Found	Not Found	Not Found	Not Found	Not Found	Not Found
	FALSE	High	[K].TSTPEDFIR.[M]			FALSE	0.0812513	0.00889178	1	2	2	A0A1S5UZ07	A0A1S5UZ07 [2186-2194]	0	1065.52	0																					No Quan Labels	Not Found	Not Found	Not Found	Not Found	Not Found	Not Found	High	Not Found	Not Found	Not Found	Not Found	Not Found
	FALSE	High	[KR].ILSAAK.[IDA]	1xPhospho [S3]; 1xTMT6plex [K6]; 1xTMT6plex [N-Term]	Q16512 1xPhospho [S240]; A0A1S5UZ07 1xPhospho [S875]	FALSE	0.0837858	0.00915509	2	6	4	Q16512; A0A1S5UZ07	Q16512 [238-243]; A0A1S5UZ07 [873-878]	0	1140.68	1	0.439	0.563	0.414	0.51	0.847137	1	0.395874	0.816653	40.9	109.8	93	215.1	89	52.3	8.14	1.96	11.64	14.02	23.31	5.27	Shared	Not Found	Not Found	Not Found	Not Found	Not Found	High	Medium	Not Found	Not Found	Not Found	Not Found	Not Found
	FALSE	High	[K].LKPLPGETMEK.[C]	1xOxidation [M9]; 1xTMT6plex [K2]; 1xTMT6plex [N-Term]		FALSE	0.0850782	0.00922376	1	2	2	A0A1S5UZ07	A0A1S5UZ07 [1093-1103]	0	1717	0	1.844	1.459	2.318	1.188					138.3	73.1	75	61.5	142.7	109.4								Not Found	High	Not Found	Not Found	Not Found	Not Found	Not Found	Not Found	Not Found	Not Found	Not Found	Not Found
	FALSE	High	[R].LLSDSLPPSTGTFQEAQSR.[L]	1xTMT6plex [N-Term]		FALSE	0.0883824	0.00950908	1	2	1	A0A1S5UZ07	A0A1S5UZ07 [1240-1258]	0	2263.18	0	1.048	0.554	2.061	1.118					89.6	101	85.5	90.4	186.2	47.3								Not Found	Not Found	Not Found	Not Found	Not Found	Not Found	Not Found	High	Not Found	Not Found	Not Found	Not Found
	FALSE	Medium	[R].AIADMLR.[A]	1xOxidation [M5]; 1xTMT6plex [N-Term]		FALSE	0.0981707	0.010397	1	2	4	A0A1S5UZ07	A0A1S5UZ07 [2228-2234]	0	1034.59	0	2.002	1.467	1.947	0.818	1	1	1	1	144.7	60.2	72.3	73.6	143.2	106	0.87	4.02	2.34	10.59	10.93	4.75		Not Found	Not Found	Medium	High	Not Found	Not Found	Not Found	Not Found	Not Found	Not Found	Not Found	Not Found
	FALSE	Medium	[K].ISIGNVVK.[T]			FALSE	0.109464	0.0116231	1	2	2	A0A1S5UZ07	A0A1S5UZ07 [8-15]	0	829.514	0																					No Quan Labels	Not Found	Not Found	Not Found	Not Found	Not Found	Not Found	Not Found	Not Found	Not Found	High	Not Found	Not Found
	FALSE	Medium	[R].ELMEEK.[K]	1xOxidation [M3]; 1xTMT6plex [K6]; 1xTMT6plex [N-Term]		FALSE	0.116597	0.0124832	1	2	4	A0A1S5UZ07	A0A1S5UZ07 [132-137]	0	1252.69	0	1.648	1.169	1.882	1.268	1	1	0.888349	1	116.2	101.1	70.5	79.8	150.1	82.4	4.78	19.81	2.67	10.88	2.05	10.09		Not Found	Not Found	Not Found	Not Found	Not Found	Not Found	Not Found	High	High	Not Found	High	Not Found
	FALSE	Medium	[K].RQFVQSAK.[E]	1xTMT6plex [K8]; 1xTMT6plex [N-Term]		FALSE	0.120678	0.0129057	1	2	1	A0A1S5UZ07	A0A1S5UZ07 [1540-1547]	1	1421.86	0	1.967	1.977	2.985	4.729					103.6	184.3	52.7	39	116.3	104.1								Not Found	Not Found	Not Found	Not Found	Not Found	Not Found	Not Found	Not Found	Not Found	Not Found	Not Found	High
	FALSE	Medium	[K].ALDYYMLR.[N]	1xOxidation [M6]; 1xTMT6plex [N-Term]		FALSE	0.121504	0.0130378	1	2	2	A0A1S5UZ07	A0A1S5UZ07 [67-74]	0	1289.68	0	0.898	0.45	3.243	2.311					74.6	142.8	83	61.8	200.5	37.4								Not Found	Not Found	Not Found	Not Found	Not Found	Not Found	Not Found	Not Found	Not Found	Not Found	High	Not Found
	FALSE	Medium	[K].AGFLDLK.[D]	1xTMT6plex [K7]; 1xTMT6plex [N-Term]		FALSE	0.121504	0.0130378	1	2	4	A0A1S5UZ07	A0A1S5UZ07 [257-263]	0	992.598	0	2.165	1.297	3.47	1.493	1	1	1	1	131.3	82.5	60.7	55.2	191.7	78.6	2.24	17.63	20.66	4.83	1.5	1.47		Not Found	Not Found	Not Found	Not Found	Not Found	Not Found	Not Found	Medium	Not Found	Not Found	Not Found	High
	FALSE	Medium	[R].ELMEEK.[K]	1xTMT6plex [K6]; 1xTMT6plex [N-Term]		FALSE	0.125695	0.0135573	1	2	1	A0A1S5UZ07	A0A1S5UZ07 [132-137]	0	1236.69	0	1.605	0.883	2.029	1.746					112.5	130	70.1	74.5	151.1	61.9								Not Found	Not Found	Not Found	Not Found	Not Found	Not Found	Not Found	Not Found	Not Found	Not Found	High	Not Found
	FALSE	Medium	[K].EAGGNPK.[Q]	1xTMT6plex [K7]; 1xTMT6plex [N-Term]		FALSE	0.125695	0.0135573	1	3	2	A0A1S5UZ07	A0A1S5UZ07 [1798-1804]	0	1130.66	0	1.6	1.801	1.277	0.449					139.3	35.7	87.1	79.5	101.5	156.9								Not Found	Not Found	Not Found	Not Found	Not Found	Not Found	Not Found	Not Found	Not Found	Not Found	High	Not Found
	FALSE	Medium	[R].ELLENPVQPINDMSYFGCLDSVMENSK.[V]	1xCarbamidomethyl [C18]; 2xOxidation [M13; M23]		FALSE	0.134371	0.0144449	1	2	2	A0A1S5UZ07	A0A1S5UZ07 [1392-1418]	0	3161.41	0																					No Quan Labels	Not Found	Not Found	Not Found	Not Found	Not Found	Not Found	Not Found	Not Found	Not Found	Not Found	Not Found	Not Found
	FALSE	Medium	[R].QELAVFCSPEPPAK.[T]	1xCarbamidomethyl [C7]		FALSE	0.135262	0.0145292	1	2	2	A0A1S5UZ07	A0A1S5UZ07 [2172-2185]	0	1572.77	0																					No Quan Labels	Not Found	Not Found	Not Found	Not Found	Not Found	Not Found	Not Found	Not Found	High	Not Found	Not Found	Not Found
	FALSE	Medium	[K].ASSLIEEAK.[K]	1xTMT6plex [N-Term]		FALSE	0.137961	0.0148323	1	2	2	A0A1S5UZ07	A0A1S5UZ07 [1179-1187]	0	1176.67	0	1.741	1.046	3.197	1.335					127.1	78.1	73	58.5	187	76.4								Not Found	Not Found	Not Found	Not Found	Not Found	Not Found	Not Found	Not Found	Not Found	Not Found	Not Found	High
	FALSE	Medium	[R].ELEEAR.[KEAS]	1xTMT6plex [N-Term]		FALSE	0.142554	0.015348	4	12	1	Q9Y4G6; P35580; A0A1S5UZ07; Q96A19	Q9Y4G6 [2514-2519]; P35580 [1660-1665]; A0A1S5UZ07 [2531-2536]; Q96A19 [79-84]	0	975.531	0	1.718	1.621	0.717	0.833					114.8	101.3	66.8	121.6	87.2	108.3							Shared	Not Found	Not Found	Not Found	Not Found	Not Found	High	Not Found	Not Found	Not Found	Not Found	Not Found	Not Found
	FALSE	Medium	[K].STVLQQQYNR.[V]	1xPhospho [Y8]; 1xTMT6plex [N-Term]	A0A1S5UZ07 1xPhospho [Y436]	FALSE	0.155106	0.0168305	1	2	1	A0A1S5UZ07	A0A1S5UZ07 [429-438]	0	1545.76	0																					No Quan Values	Not Found	Not Found	Not Found	Not Found	Not Found	Not Found	Not Found	Not Found	Not Found	Not Found	High	Not Found
	FALSE	Medium	[R].GTPQDLAR.[A]	1xPhospho [T2]; 1xTMT6plex [N-Term]	A0A1S5UZ07 1xPhospho [T1280]	FALSE	0.165461	0.0179864	1	2	2	A0A1S5UZ07	A0A1S5UZ07 [1279-1286]	0	1166.58	0	0.625	0.758	0.487	0.418					68.1	74.7	108.9	178.8	87.1	82.5								Not Found	Not Found	Not Found	Not Found	Not Found	High	Not Found	Not Found	Not Found	Not Found	Not Found	Not Found
	FALSE	Medium	[K].EADESLNFEEQILEAAK.[S]	1xPhospho [S5]; 1xTMT6plex [N-Term]	A0A1S5UZ07 1xPhospho [S2355]	FALSE	0.172015	0.0188873	1	2	2	A0A1S5UZ07	A0A1S5UZ07 [2351-2367]	0	2245.05	0	0.217	0.841	0.599	0.605					24.7	100.4	113.8	166	99.5	95.7								Not Found	Not Found	Not Found	Not Found	Not Found	Not Found	High	Not Found	Not Found	Not Found	Not Found	Not Found
	FALSE	Medium	[K].RQFVQSAK.[E]	1xTMT6plex [N-Term]		FALSE	0.173134	0.0190256	1	2	4	A0A1S5UZ07	A0A1S5UZ07 [1540-1547]	1	1192.7	0	1.021	0.901	1.014	0.662	1	1	1	1	116.8	65.8	114.4	99.4	100.7	103	25.58	35.81	37.14	13.9	7.55	4.29		Not Found	Not Found	Medium	High	Not Found	Not Found	Not Found	Not Found	Not Found	Not Found	Not Found	Not Found
	FALSE	Medium	[RK].MVEAAK.[G]	1xTMT6plex [K6]; 1xTMT6plex [N-Term]		FALSE	0.175396	0.0193385	2	3	1	Q9Y4G6; A0A1S5UZ07	Q9Y4G6 [873-878]; A0A1S5UZ07 [887-892]	0	877.501	0	2.319	1.111	3.607	1.586					149.8	80.3	64.6	50.7	182.7	71.8							Shared	Not Found	Not Found	Not Found	Not Found	Not Found	Not Found	Not Found	Not Found	Not Found	Not Found	Not Found	High
	FALSE	Medium	[K].FLPSELRDEH.[-]			FALSE	0.181192	0.0200707	1	2	2	A0A1S5UZ07	A0A1S5UZ07 [2549-2558]	1	1242.61	0																					No Quan Labels	Not Found	Not Found	Not Found	Not Found	Not Found	Not Found	Not Found	Not Found	Not Found	Not Found	Not Found	Not Found
	FALSE	Medium	[RK].MVEAAK.[G]	1xTMT6plex [K6]; 1xTMT6plex [N-Term]		FALSE	0.18598	0.0206731	2	3	1	Q9Y4G6; A0A1S5UZ07	Q9Y4G6 [873-878]; A0A1S5UZ07 [887-892]	0	1106.66	0	2.029	1.321	2.778	1.879					118.4	115	58.3	61.2	170	77.1							Shared	Not Found	Not Found	Not Found	Not Found	Not Found	Medium	Not Found	Not Found	Not Found	Not Found	Not Found	Not Found
	FALSE	Medium	[R].ELETVR.[QE]	1xTMT6plex [N-Term]		FALSE	0.206597	0.0232213	2	6	2	Q9UPV0; A0A1S5UZ07	Q9UPV0 [898-903]; A0A1S5UZ07 [1386-1391]	0	975.567	0	2.128	1.25	2.864	1.781	1	1	0.544541	1	126.9	106.9	59.7	60	171.9	74.6	4.23	13.56	0.97	2.78	0.05	15.37	Shared	Not Found	Not Found	Not Found	Not Found	Not Found	Not Found	Not Found	Medium	Medium	Not Found	Not Found	Not Found
	FALSE	Medium	[K].DLQEVK.[SA]	1xTMT6plex [K6]; 1xTMT6plex [N-Term]		FALSE	0.229871	0.0260799	2	6	1	Q86Y13; A0A1S5UZ07	Q86Y13 [651-656]; A0A1S5UZ07 [1080-1085]	0	1189.72	0	0.973	0.669	0.987	1.73					74.3	185.4	76.3	107.2	105.7	51.1							Shared	Medium	Not Found	Not Found	Not Found	Not Found	Not Found	Not Found	Not Found	Not Found	Not Found	Not Found	Not Found
	FALSE	Medium	[K].MVAAAK.[YA]	1xTMT6plex [N-Term]		FALSE	0.242646	0.0275679	2	7	2	P36542; A0A1S5UZ07	P36542 [50-55]; A0A1S5UZ07 [1017-1022]	0	819.496	0	1.891	1.622	3.012	1.701	1	1	1	1	122.6	91.6	64.8	53.8	162.1	105.1	6.44	8.86	1.81	7.43	8.85	8.53	Shared	Not Found	Not Found	Medium	Medium	Not Found	Not Found	Not Found	Not Found	Not Found	Not Found	Not Found	Not Found
	FALSE	Medium	[KR].ILSAAK.[IDA]	1xTMT6plex [K6]; 1xTMT6plex [N-Term]		FALSE	0.245964	0.0279359	2	6	2	Q16512; A0A1S5UZ07	Q16512 [238-243]; A0A1S5UZ07 [873-878]	0	1060.71	0	1.78	0.939	3.97	2.91					123.3	126.5	69.3	43.5	172.5	65							Shared	Not Found	Not Found	Not Found	Not Found	Not Found	Not Found	Medium	Not Found	Not Found	Not Found	Not Found	Not Found
	FALSE	Medium	[K].ASSLIEEAKK.[A]	2xTMT6plex [K9; K10]; 1xTMT6plex [N-Term]		FALSE	0.24764	0.0281386	1	2	2	A0A1S5UZ07	A0A1S5UZ07 [1179-1188]	1	1763.09	0	3.818	2.342	1.545	1.721					169.9	113.5	44.5	66	101.9	104.2								Not Found	Not Found	Not Found	Not Found	Not Found	Not Found	Not Found	Not Found	Medium	Not Found	Not Found	Not Found
	FALSE	Medium	[K].LKPLPGETMEK.[C]	1xOxidation [M9]; 2xTMT6plex [K2; K11]; 1xTMT6plex [N-Term]		FALSE	0.249329	0.0283392	1	2	2	A0A1S5UZ07	A0A1S5UZ07 [1093-1103]	0	1946.16	0	1.876	1.439	1.461	1.049					135.7	86	72.3	82	119.9	104.1								Not Found	Not Found	Medium	Not Found	Not Found	Not Found	Not Found	Not Found	Not Found	Not Found	Not Found	Not Found
	FALSE	Medium	[KR].ILSAAK.[IDA]	1xTMT6plex [N-Term]		FALSE	0.263267	0.0301774	2	6	2	Q16512; A0A1S5UZ07	Q16512 [238-243]; A0A1S5UZ07 [873-878]	0	831.55	0	2.355	1.335	4.062	1.87					138.1	87.7	58.6	46.9	190.4	78.3							Shared	Not Found	Not Found	Not Found	Not Found	Not Found	Not Found	Not Found	Not Found	Not Found	Medium	Not Found	Not Found
	FALSE	Medium	[K].ASSLIEEAKK.[A]	1xPhospho [S3]; 2xTMT6plex [K9; K10]; 1xTMT6plex [N-Term]		FALSE	0.274197	0.0315489	1	2	1	A0A1S5UZ07	A0A1S5UZ07 [1179-1188]	1	1843.05	0	0.865	1.294	0.262	0.392					76.2	76.3	88	194.6	51	113.9								Not Found	Medium	Not Found	Not Found	Not Found	Not Found	Not Found	Not Found	Not Found	Not Found	Not Found	Not Found
	FALSE	Medium	[R].DVDNALR.[A]			FALSE	0.287438	0.0330559	1	2	2	A0A1S5UZ07	A0A1S5UZ07 [1225-1231]	0	802.405	0																					No Quan Labels	Medium	Not Found	Not Found	Not Found	Not Found	Not Found	Not Found	Not Found	Not Found	Not Found	Not Found	Not Found
	FALSE	Medium	[K].LISSAK.[QN]	1xTMT6plex [K6]; 1xTMT6plex [N-Term]		FALSE	0.295232	0.0341056	3	9	4	Q9Y4G6; B2R9F5; A0A1S5UZ07	Q9Y4G6 [2425-2430]; B2R9F5 [119-124]; A0A1S5UZ07 [2441-2446]	0	1076.71	0	1.609	1.332	1.799	1.215	1	1	1	1	120.5	92.2	74.9	75.9	136.6	99.8	21.44	8.49	10.1	41.37	21.55	7.64	Shared	Not Found	Not Found	Medium	Medium	Not Found	Not Found	Not Found	Not Found	Not Found	Not Found	Not Found	Not Found
	FALSE	Medium	[K].MVAAAK.[YA]	1xTMT6plex [K6]; 1xTMT6plex [N-Term]		FALSE	0.307218	0.0356507	2	7	2	P36542; A0A1S5UZ07	P36542 [50-55]; A0A1S5UZ07 [1017-1022]	0	1048.66	0	2.254	1.593	2.374	1.875	0.386619	1	0.168486	0.433454	134.8	110.8	59.8	59.1	140.2	95.3	5.09	8.73	7.26	19.6	13.91	9.87	Shared	Medium	Not Found	Not Found	Not Found	Not Found	Not Found	Not Found	Not Found	Not Found	Not Found	Not Found	Medium
	FALSE	Medium	[K].ECDNALR.[E]	1xCarbamidomethyl [C2]; 1xTMT6plex [N-Term]		FALSE	0.345159	0.0404599	2	6	2	Q9Y4G6; A0A1S5UZ07	Q9Y4G6 [1364-1370]; A0A1S5UZ07 [1379-1385]	0	1106.55	0	1.448	1.068	1.896	1.502					109.2	114.4	75.4	76.1	144.4	80.5							Shared	Not Found	Not Found	Not Found	Not Found	Not Found	Not Found	Medium	Not Found	Not Found	Not Found	Not Found	Not Found
	FALSE	Medium	[R].LEHAAK.[Q]	1xTMT6plex [N-Term]		FALSE	0.360719	0.0424076	1	2	1	A0A1S5UZ07	A0A1S5UZ07 [934-939]	0	897.536	0	2.09	1.227	4.701	0.673					153.8	29.8	73.6	44.3	208.1	90.3								Not Found	Not Found	Not Found	Not Found	Not Found	Not Found	Not Found	Not Found	Not Found	Not Found	Not Found	Medium
	FALSE	Medium	[R].LADVVK.[L]	1xTMT6plex [K6]; 1xTMT6plex [N-Term]		FALSE	0.38376	0.045234	1	2	2	A0A1S5UZ07	A0A1S5UZ07 [2075-2080]	0	1102.72	0	2.33	1.379	2.56	1.886	1	1	1	1	136.5	112.2	58.6	59.5	152.3	80.8	9.68	13.31	2.79	13.08	12.2	13.19		Not Found	Not Found	Not Found	Not Found	Not Found	Not Found	Not Found	Not Found	Medium	Medium	Not Found	Not Found
	FALSE	Medium	[R].ALHYGR.[E]	1xTMT6plex [N-Term]		FALSE	0.38376	0.045234	1	2	1	A0A1S5UZ07	A0A1S5UZ07 [2253-2258]	0	945.547	0	1.33	0.96	1.885	1.499					108.9	113	81.9	75.4	142.2	78.6								Not Found	Not Found	Not Found	Not Found	Medium	Not Found	Not Found	Not Found	Not Found	Not Found	Not Found	Not Found
	FALSE	Medium	[K].LISSAK.[QN]	1xTMT6plex [N-Term]		FALSE	0.402893	0.0476432	3	9	2	Q9Y4G6; B2R9F5; A0A1S5UZ07	Q9Y4G6 [2425-2430]; B2R9F5 [119-124]; A0A1S5UZ07 [2441-2446]	0	847.545	0	2.309	1.225	5.386	1.848					137.5	74.1	59.5	40.1	215.9	72.9							Shared	Not Found	Not Found	Not Found	Not Found	Not Found	Not Found	Not Found	Medium	Not Found	Not Found	Not Found	Not Found
FALSE	High	Master Protein	A0A140VK53	Testicular secretory protein Li 53 OS=Homo sapiens OX=9606 PE=2 SV=1	0	FALSE	941.674	46	133	1515	133	1	2752	299.4	12.06	4172	1454.85	125	126	metabolic process	nucleus;spliceosomal complex	nucleotide binding;protein binding;RNA binding		23524	SRRM2	16		ENSG00000167978.16		0	0.643	0.707	0.525	0.438	1	1	1	1	94.7	56.7	147.1	129.4	68	104.1	24.32	34.04	7.28	16.74	9.04
	Checked	Confidence	Annotated Sequence	Modifications	Modifications in Master Proteins	Contaminant	Qvality PEP	Qvality q-value	# Protein Groups	# Proteins	# PSMs	Master Protein Accessions	Positions in Master Proteins	# Missed Cleavages	Theo. MH+ [Da]	# Razor Quan Results	Abundance Ratio: (126) / (128)	Abundance Ratio: (131) / (128)	Abundance Ratio: (130) / (129)	Abundance Ratio: (127) / (129)	Abundance Ratio Adj. P-Value: (126) / (128)	Abundance Ratio Adj. P-Value: (131) / (128)	Abundance Ratio Adj. P-Value: (130) / (129)	Abundance Ratio Adj. P-Value: (127) / (129)	Abundances (Grouped): 126	Abundances (Grouped): 127	Abundances (Grouped): 128	Abundances (Grouped): 129	Abundances (Grouped): 130	Abundances (Grouped): 131	Abundances (Grouped) CV [%]: 126	Abundances (Grouped) CV [%]: 127	Abundances (Grouped) CV [%]: 128	Abundances (Grouped) CV [%]: 129	Abundances (Grouped) CV [%]: 130	Abundances (Grouped) CV [%]: 131	Quan Info	Found in Sample: [S1] F1: 126, Sample	Found in Sample: [S2] F2: 126, Sample	Found in Sample: [S3] F3: 126, Sample	Found in Sample: [S4] F4: 126, Sample	Found in Sample: [S5] F5: 126, Sample	Found in Sample: [S6] F6: 126, Sample	Found in Sample: [S7] F7: 126, Sample	Found in Sample: [S8] F8: 126, Sample	Found in Sample: [S9] F9: 126, Sample	Found in Sample: [S10] F10: 126, Sample	Found in Sample: [S11] F11: 126, Sample	Found in Sample: [S12] F12: 126, Sample
	FALSE	High	[R].SSGHSSSELSPDAVEK.[A]	1xPhospho [S10]; 1xTMT6plex [K16]; 1xTMT6plex [N-Term]	A0A140VK53 1xPhospho [S1387]	FALSE	1.36817e-05	0	1	2	10	A0A140VK53	A0A140VK53 [1378-1393]	0	1925.87	0	0.513	0.675	0.406	0.326	1	1	1	1	76.7	51.4	149.4	157.7	64	100.8	17.17	3.09	3.84	13.77	19.83	8.36		Not Found	Not Found	Not Found	Not Found	Medium	High	Not Found	Not Found	Not Found	Not Found	Not Found	Not Found
	FALSE	High	[R].MGQAPSQSLLPPAQDQPRSPVPSAFSDQSR.[C]	1xPhospho [S]; 1xOxidation [M1]	A0A140VK53 1xPhospho [S]	FALSE	3.59222e-05	0	1	3	9	A0A140VK53	A0A140VK53 [2431-2460]	1	3275.52	0																					No Quan Labels	Not Found	Not Found	Not Found	Not Found	Not Found	Not Found	Not Found	Not Found	Not Found	Not Found	Not Found	Not Found
	FALSE	High	[K].SSTPPGESYFGVSSLQLK.[G]	1xPhospho [S/T]; 1xTMT6plex [K18]; 1xTMT6plex [N-Term]	A0A140VK53 1xPhospho [S/T]	FALSE	4.54178e-05	0	1	2	8	A0A140VK53	A0A140VK53 [1041-1058]	0	2422.23	0	0.3	0.335	0.55	0.669	1	1	1	1	46.9	103.8	156.4	155.2	85.4	52.3	22.65	11.43	3.62	3.32	2.82	3.4		Not Found	Not Found	Not Found	Not Found	Not Found	Not Found	High	High	Not Found	Not Found	Not Found	Not Found
	FALSE	High	[K].SSTPPGESYFGVSSLQLK.[G]	1xPhospho [S/T/Y]; 1xTMT6plex [K18]; 1xTMT6plex [N-Term]	A0A140VK53 1xPhospho [T/S/Y]	FALSE	5.76419e-06	0	1	2	16	A0A140VK53	A0A140VK53 [1041-1058]	0	2193.07	0	0.212	0.363	0.464	0.46	1	1	1	1	38.7	74.5	182.9	162.1	75.3	66.5	29.67	59.46	31.9	14.84	7.35	24.67		Not Found	High	High	Not Found	High	Medium	Not Found	Not Found	Not Found	Not Found	Not Found	Not Found
	FALSE	High	[K].SSTPPGESYFGVSSLQLK.[G]	1xPhospho [T/S]	A0A140VK53 1xPhospho [T/S]	FALSE	3.48151e-05	0	1	2	12	A0A140VK53	A0A140VK53 [1041-1058]	0	1963.9	0																					No Quan Labels	Not Found	Not Found	Not Found	Not Found	Not Found	Not Found	Not Found	Not Found	Not Found	Not Found	Not Found	Not Found
	FALSE	High	[R].MAPALSGANLTSPR.[V]	1xTMT6plex [N-Term]		FALSE	6.33469e-05	0	1	2	2	A0A140VK53	A0A140VK53 [2371-2384]	0	1614.88	0	1.238	0.648	2.679	2.301					106	135.8	85.6	59	158.1	55.5								Not Found	Not Found	Not Found	Not Found	Not Found	Not Found	Not Found	Not Found	Not Found	High	Not Found	Not Found
	FALSE	High	[K].MALPPQEDATASPPR.[Q]	1xPhospho [S12]; 1xOxidation [M1]	A0A140VK53 1xPhospho [S1179]	FALSE	2.10517e-05	0	1	2	8	A0A140VK53	A0A140VK53 [1168-1182]	0	1676.73	0																					No Quan Labels	High	High	Not Found	Not Found	High	Not Found	Not Found	Not Found	Not Found	Not Found	Not Found	Not Found
	FALSE	High	[K].MALPPQEDATASPPR.[Q]	1xPhospho [S/T]; 1xTMT6plex [N-Term]	A0A140VK53 1xPhospho [S/T]	FALSE	3.05952e-05	0	1	2	9	A0A140VK53	A0A140VK53 [1168-1182]	0	1889.9	0	0.419	0.472	0.552	0.651	1	1	1	1	61.8	95	147.3	145.9	80.5	69.6	7.75	2.91	6.63	3.82	9.25	5.04		High	High	Not Found	Not Found	Not Found	Not Found	Not Found	Not Found	Not Found	Not Found	Not Found	High
	FALSE	High	[K].MALPPQEDATASPPR.[Q]	1xPhospho [S12]; 1xOxidation [M1]; 1xTMT6plex [N-Term]	A0A140VK53 1xPhospho [S1179]	FALSE	6.37652e-05	0	1	2	6	A0A140VK53	A0A140VK53 [1168-1182]	0	1905.9	0	0.387	0.496	0.505	0.507	1	1	1	1	59	78.8	152.5	155.5	78.6	75.6	6.56	21.15	3.86	6.48	3.77	9.34		High	Not Found	Not Found	Not Found	Not Found	Not Found	Not Found	High	High	Not Found	Not Found	High
	FALSE	High	[R].HSLSGSSPGMK.[D]	1xPhospho [S]; 1xOxidation [M10]; 1xTMT6plex [N-Term]; 1xTMT6plex [K11]	A0A140VK53 1xPhospho [S]	FALSE	2.12015e-05	0	1	2	13	A0A140VK53	A0A140VK53 [1457-1467]	0	1412.64	0	0.554	0.685	0.754	0.381	1	1	1	1	85	45.8	153.4	120.2	90.6	105	1.38	8.52	7.39	5.25	8.51	15.14		Not Found	Not Found	Not Found	Not Found	Not Found	Not Found	High	High	High	High	Not Found	Not Found
	FALSE	High	[R].HGGSPQPLATTPLSQEPVNPPSEASPTR.[D]	2xPhospho [T/S]; 1xTMT6plex [N-Term]	A0A140VK53 2xPhospho [T/S]	FALSE	4.99203e-06	0	1	4	3	A0A140VK53	A0A140VK53 [374-401]	0	3241.51	0	1.259	1.089	0.445	0.364					133.8	49.1	106.3	135	60	115.7								Not Found	Not Found	Not Found	Not Found	Not Found	Not Found	Not Found	High	Not Found	Not Found	Not Found	Not Found
	FALSE	High	[K].THTTALAGRSPSPASGR.[R]	2xPhospho [S10; S12]	A0A140VK53 2xPhospho [S295; S297]	FALSE	2.65845e-05	0	1	6	16	A0A140VK53	A0A140VK53 [286-302]	1	1826.79	0																					No Quan Labels	Not Found	Not Found	Not Found	High	High	High	High	Not Found	Not Found	Medium	High	Medium
	FALSE	High	[R].TPAAAAAMNLASPR.[T]	1xPhospho [S12]; 1xOxidation [M8]; 1xTMT6plex [N-Term]	A0A140VK53 1xPhospho [S2272]	FALSE	3.04882e-05	0	1	3	9	A0A140VK53	A0A140VK53 [2261-2274]	0	1666.82	0	0.401	0.768	0.36	0.502	1	1	1	1	49.2	90.1	122.7	179.3	64.6	94.2	18.54	29.06	7.5	17.33	10.3	13.61		Not Found	High	High	Not Found	Not Found	Not Found	Not Found	Not Found	Not Found	Medium	High	Not Found
	FALSE	High	[R].TPAAAAAMNLASPR.[T]	1xPhospho [S12]; 1xOxidation [M8]	A0A140VK53 1xPhospho [S2272]	FALSE	2.55734e-05	0	1	3	4	A0A140VK53	A0A140VK53 [2261-2274]	0	1437.66	0																					No Quan Labels	Not Found	Not Found	Not Found	Not Found	Not Found	High	High	Not Found	Not Found	Not Found	Not Found	Not Found
	FALSE	High	[R].TPAALAALSLTGSGTPPTAANYPSSSR.[T]	1xPhospho [T15]; 1xTMT6plex [N-Term]	A0A140VK53 1xPhospho [T2316]	FALSE	6.1697e-05	0	1	2	4	A0A140VK53	A0A140VK53 [2302-2328]	0	2868.43	0	0.182	0.163	0.57	0.436	0.300228	0.295761	1	1	38.2	69	210	158.3	90.3	34.2	36	2.46	10.42	7.48	2	22.05		High	High	Not Found	Not Found	Not Found	Not Found	Not Found	Not Found	Not Found	Not Found	Not Found	Not Found
	FALSE	High	[K].AGMSSNQSISSPVLDAVPRTPSRER.[S]	2xPhospho [S/T]; 1xOxidation [M3]; 1xTMT6plex [N-Term]	A0A140VK53 2xPhospho [S/T]	FALSE	7.26267e-05	0	1	2	4	A0A140VK53	A0A140VK53 [1394-1418]	2	3047.42	0	1.085	1.203	0.333	0.39	1	1	1	1	124.2	50.6	114.5	129.7	43.2	137.8	15.65	30.25	0.68	1.63	1.44	5.38		Not Found	Not Found	Not Found	Not Found	Not Found	Not Found	Not Found	High	Not Found	High	Not Found	Not Found
	FALSE	High	[K].AGMSSNQSISSPVLDAVPRTPSR.[E]	2xPhospho [S11; T/S]; 1xOxidation [M3]	A0A140VK53 2xPhospho [S1404; S/T]	FALSE	7.47521e-05	0	1	2	4	A0A140VK53	A0A140VK53 [1394-1416]	1	2533.12	0																					No Quan Labels	Not Found	Not Found	Not Found	Not Found	Not Found	High	High	Not Found	Not Found	Not Found	Not Found	Not Found
	FALSE	High	[K].AGMSSNQSISSPVLDAVPR.[T]	1xPhospho [S]; 1xOxidation [M3]; 1xTMT6plex [N-Term]	A0A140VK53 1xPhospho [S]	FALSE	2.55734e-05	0	1	2	19	A0A140VK53	A0A140VK53 [1394-1412]	0	2241.08	0	0.427	0.466	0.648	0.549	1	1	1	1	65.9	77	154.2	140.3	90.9	71.8	21.74	36.55	5.99	10.69	15.02	46.11		Not Found	Not Found	Not Found	Not Found	Not Found	Not Found	Not Found	Not Found	High	High	High	High
	FALSE	High	[K].AGMSSNQSISSPVLDAVPR.[T]	1xPhospho [S]; 1xOxidation [M3]	A0A140VK53 1xPhospho [S]	FALSE	7.02379e-06	0	1	2	7	A0A140VK53	A0A140VK53 [1394-1412]	0	2011.92	0																					No Quan Labels	Not Found	Not Found	Not Found	Not Found	Not Found	Not Found	Not Found	High	Not Found	Not Found	Not Found	Not Found
	FALSE	High	[K].AGMSSNQSISSPVLDAVPR.[T]	1xPhospho [S]	A0A140VK53 1xPhospho [S]	FALSE	1.80693e-05	0	1	2	3	A0A140VK53	A0A140VK53 [1394-1412]	0	1995.92	0																					No Quan Labels	Not Found	Not Found	Not Found	Not Found	Not Found	Not Found	Not Found	Not Found	Not Found	Not Found	Not Found	Not Found
	FALSE	High	[K].AGMSSNQSISSPVLDAVPR.[T]	1xPhospho [S]; 1xTMT6plex [N-Term]	A0A140VK53 1xPhospho [S]	FALSE	3.30034e-06	0	1	2	7	A0A140VK53	A0A140VK53 [1394-1412]	0	2225.08	0	0.348	0.27	0.718	0.818	1	1	1	1	54.1	112.4	155.3	137.5	98.8	42	0.02	4.6	14.11	19.62	4.03	15.19		Not Found	Not Found	Not Found	Not Found	Not Found	Not Found	Not Found	Not Found	Not Found	Not Found	High	High
	FALSE	High	[K].SATRPSPSPERSSTGPEPPAPTPLLAER.[H]	2xPhospho [S6; S8]	A0A140VK53 2xPhospho [S351; S353]	FALSE	6.82481e-06	0	1	5	2	A0A140VK53	A0A140VK53 [346-373]	1	3045.41	0																					No Quan Labels	Not Found	Not Found	Not Found	Not Found	Not Found	Not Found	Not Found	Not Found	Not Found	Not Found	Not Found	Not Found
	FALSE	High	[R].SCFESSPDPELK.[S]	1xCarbamidomethyl [C2]; 1xPhospho [S]; 1xTMT6plex [K12]; 1xTMT6plex [N-Term]	A0A140VK53 1xPhospho [S]	FALSE	6.69772e-05	0	1	4	9	A0A140VK53	A0A140VK53 [871-882]	0	1704.74	0	0.623	0.813	0.605	0.416	1	1	1	1	83.2	56.4	133.7	135.8	82.2	108.7	2.54	10.58	8.04	3.42	9.73	11.58		Not Found	Not Found	Not Found	Not Found	Not Found	High	High	High	Not Found	Not Found	Not Found	Not Found
	FALSE	High	[R].RGEGDAPFSEPGTTSTQRPSSPETATK.[Q]	1xPhospho [T/S]; 1xTMT6plex [K27]; 1xTMT6plex [N-Term]	A0A140VK53 1xPhospho [S/T]	FALSE	6.37652e-05	0	1	6	17	A0A140VK53	A0A140VK53 [303-329]	1	3329.61	0	0.57	0.776	0.457	0.489	1	1	1	1	81.7	66.2	143.5	135.3	61.9	111.4	11.5	7.62	3.7	3.59	4.09	6.04		Not Found	Not Found	Not Found	Not Found	Not Found	Not Found	Not Found	High	High	High	Not Found	Not Found
	FALSE	High	[R].YSHSGSSSPDTK.[V]	1xPhospho [S/Y]; 1xTMT6plex [N-Term]; 1xTMT6plex [K12]	A0A140VK53 1xPhospho [Y/S]	FALSE	4.09725e-05	0	1	4	17	A0A140VK53	A0A140VK53 [967-978]	0	1561.67	0	0.599	0.63	0.619	0.18	1	1	1	1	100	22.9	166.8	126.8	78.4	105.1	11.27	29.13	15.3	26.27	35.19	7.24		Not Found	Not Found	Not Found	Not Found	Not Found	Medium	High	High	High	Not Found	Not Found	Not Found
	FALSE	High	[R].RGEGDAPFSEPGTTSTQRPSSPETATK.[Q]	1xPhospho [S/T]	A0A140VK53 1xPhospho [S/T]	FALSE	1.30605e-05	0	1	6	13	A0A140VK53	A0A140VK53 [303-329]	1	2871.28	0																					No Quan Labels	Not Found	Not Found	Not Found	Not Found	High	Not Found	Not Found	Not Found	Not Found	Not Found	Not Found	Not Found
	FALSE	High	[R].FQSDSSSYPTVDSNSLLGQSR.[L]	1xPhospho [S]	A0A140VK53 1xPhospho [S]	FALSE	6.72743e-06	0	1	2	3	A0A140VK53	A0A140VK53 [1138-1158]	0	2355.01	0																					No Quan Labels	Not Found	Not Found	Not Found	Not Found	Not Found	Not Found	Not Found	High	Not Found	Not Found	Not Found	Not Found
	FALSE	High	[K].LPQSSSSESSPPSPQPTK.[V]	1xPhospho [S13]; 1xTMT6plex [N-Term]	A0A140VK53 1xPhospho [S424]	FALSE	2.91296e-05	0	1	4	4	A0A140VK53	A0A140VK53 [412-429]	0	2150.02	0	0.494	0.618	0.53	0.354	1	1	1	1	72.8	54.2	147.6	153.1	81.1	91.2	11.94	20.78	16.72	16.69	29.53	22.65		Not Found	Not Found	Not Found	Not Found	Not Found	Not Found	Not Found	Not Found	Not Found	Not Found	High	High
	FALSE	High	[K].LPQSSSSESSPPSPQPTK.[V]	1xPhospho [S13]; 1xTMT6plex [K18]; 1xTMT6plex [N-Term]	A0A140VK53 1xPhospho [S424]	FALSE	5.65878e-05	0	1	4	4	A0A140VK53	A0A140VK53 [412-429]	0	2379.18	0	0.376	0.611	0.449	0.442	1	1	1	1	58.2	68.4	154.7	154.6	69.4	94.6	13.39	4.38	14.33	6.72	2	16.1		High	High	Not Found	Not Found	Not Found	Not Found	Not Found	Not Found	Not Found	Not Found	Not Found	Not Found
	FALSE	High	[K].LPQSSSSESSPPSPQPTK.[V]	1xPhospho [S13]	A0A140VK53 1xPhospho [S424]	FALSE	7.03593e-07	0	1	4	6	A0A140VK53	A0A140VK53 [412-429]	0	1920.86	0																					No Quan Labels	Not Found	Not Found	Not Found	Not Found	High	Not Found	Not Found	Not Found	Not Found	Not Found	Not Found	Not Found
	FALSE	High	[R].SAHATAPVNIAGSR.[T]	1xTMT6plex [N-Term]		FALSE	4.27001e-05	0	1	2	2	A0A140VK53	A0A140VK53 [2343-2356]	0	1580.87	0	0.01	0.954	2.162	2.279						171.7	97.2	75.4	162.9	92.8								Not Found	Not Found	Not Found	Not Found	Not Found	Not Found	Not Found	Not Found	Not Found	Not Found	Not Found	Not Found
	FALSE	High	[K].AQTPPGPSLSGSK.[S]	1xPhospho [T3]; 1xTMT6plex [N-Term]; 1xTMT6plex [K13]	A0A140VK53 1xPhospho [T1003]	FALSE	4.57294e-05	0	1	3	8	A0A140VK53	A0A140VK53 [1001-1013]	0	1535.77	0	0.423	0.614	0.536	0.458	1	1	1	1	62	69.3	146.6	151.2	81	89.9	5.88	5.82	5.34	5.46	7.01	2.98		Not Found	Not Found	Not Found	Not Found	Not Found	Not Found	Not Found	High	High	High	Not Found	Not Found
	FALSE	High	[K].AQTPPGPSLSGSK.[S]	1xPhospho [T3]; 1xTMT6plex [K13]; 1xTMT6plex [N-Term]	A0A140VK53 1xPhospho [T1003]	FALSE	4.32908e-05	0	1	3	8	A0A140VK53	A0A140VK53 [1001-1013]	0	1764.93	0	0.396	0.563	0.462	0.445	1	1	1	1	59.2	71.7	149.4	161.1	74.4	84.2	11.86	10.93	7.43	11.34	16.14	10.4		High	Not Found	Not Found	Not Found	Not Found	Not Found	Not Found	Not Found	High	Not Found	Not Found	High
	FALSE	High	[K].AQTPPGPSLSGSKSPCPQEK.[S]	1xCarbamidomethyl [C16]; 1xPhospho [S]	A0A140VK53 1xPhospho [S]	FALSE	6.91923e-05	0	1	2	3	A0A140VK53	A0A140VK53 [1001-1020]	1	2132.97	0																					No Quan Labels	Not Found	Not Found	Not Found	Not Found	Not Found	Not Found	Not Found	Not Found	Not Found	Not Found	Not Found	Not Found
	FALSE	High	[K].EQNSALPTSSQDEELMEVVEK.[S]	1xPhospho [S/T]	A0A140VK53 1xPhospho [S/T]	FALSE	2.57545e-05	0	1	2	5	A0A140VK53	A0A140VK53 [1224-1244]	0	2443.06	0																					No Quan Labels	Not Found	Not Found	Not Found	Not Found	Not Found	Not Found	Not Found	Not Found	Not Found	Not Found	Not Found	Not Found
	FALSE	High	[R].SGSSQELDVKPSASPQER.[S]	1xPhospho [S]	A0A140VK53 1xPhospho [S]	FALSE	2.2518e-05	0	1	2	24	A0A140VK53	A0A140VK53 [1539-1556]	0	1981.89	0																					No Quan Labels	High	High	High	Not Found	High	Not Found	Not Found	Not Found	Not Found	Not Found	Not Found	Not Found
	FALSE	High	[K].EQNSALPTSSQDEELMEVVEK.[S]	1xPhospho [S]; 1xOxidation [M16]; 1xTMT6plex [N-Term]; 1xTMT6plex [K21]	A0A140VK53 1xPhospho [S]	FALSE	3.24146e-06	0	1	2	8	A0A140VK53	A0A140VK53 [1224-1244]	0	2688.22	0	0.75	1.538	0.439	0.419					75.2	61	100.2	145.6	63.9	154.1								Not Found	Not Found	Not Found	Not Found	Not Found	High	Not Found	Not Found	Not Found	Not Found	Not Found	Not Found
	FALSE	High	[R].GEGDAPFSEPGTTSTQRPSSPETATK.[Q]	1xPhospho [S]; 1xTMT6plex [K26]; 1xTMT6plex [N-Term]	A0A140VK53 1xPhospho [S]	FALSE	8.77175e-05	3.96551e-05	1	6	4	A0A140VK53	A0A140VK53 [304-329]	0	3173.5	0	0.613	0.806	0.491	0.572					82.5	76.1	134.5	133.1	65.4	108.4								Not Found	Not Found	Not Found	Not Found	Not Found	Not Found	Not Found	High	Not Found	Not Found	Not Found	Not Found
	FALSE	High	[R].FQSDSSSYPTVDSNSLLGQSR.[L]	1xPhospho [S]; 1xTMT6plex [N-Term]	A0A140VK53 1xPhospho [S]	FALSE	9.09971e-05	3.96551e-05	1	2	10	A0A140VK53	A0A140VK53 [1138-1158]	0	2584.18	0	0.615	1.341	0.429	0.646	1	1	1	1	39.2	128.1	63.8	198.3	85.2	85.5	14.16	4.87	60.48	10.6	11.59	35.42		High	Not Found	High	Not Found	Not Found	Not Found	Not Found	Not Found	Not Found	Not Found	Not Found	Not Found
	FALSE	High	[K].EQNSALPTSSQDEELMEVVEK.[S]	1xPhospho [S]; 1xTMT6plex [N-Term]	A0A140VK53 1xPhospho [S]	FALSE	0.000108143	3.96551e-05	1	2	4	A0A140VK53	A0A140VK53 [1224-1244]	0	2672.22	0	0.404	0.609	0.657	0.858					50.4	118.9	124.9	138.6	91.1	76								Not Found	Not Found	Not Found	Not Found	Not Found	High	Not Found	Not Found	Not Found	Not Found	Not Found	Not Found
	FALSE	High	[R].TAVAPSAVNLADPRTPTAPAVNLAGAR.[T]	1xPhospho [T]; 1xTMT6plex [N-Term]	A0A140VK53 1xPhospho [T]	FALSE	0.000112293	3.96551e-05	1	3	5	A0A140VK53	A0A140VK53 [2275-2301]	1	2910.54	0	0.097	0.14	0.253	0.567	1	1	1	1	13	135.4	133.6	238.9	60.4	18.7	27.56	1.87	7.3	0.52	16.43	39.42		Not Found	Not Found	High	High	Not Found	Not Found	Not Found	Not Found	Not Found	Not Found	Not Found	Not Found
	FALSE	High	[R].TPQAPASANLVGPR.[S]	1xTMT6plex [N-Term]		FALSE	0.00010138	3.96551e-05	1	2	4	A0A140VK53	A0A140VK53 [2329-2342]	0	1607.91	0	0.802	1.245	1.479	1.142	1	1	1	1	78.8	94.9	98.2	83.1	122.9	122.2	8.64	0.52	18.97	34.08	12.33	2.03		Not Found	High	High	Not Found	Not Found	Not Found	Not Found	Not Found	Not Found	Not Found	Not Found	Not Found
	FALSE	High	[R].TPAIPTAVNLADSR.[T]	1xTMT6plex [N-Term]		FALSE	8.66439e-05	3.96551e-05	1	3	4	A0A140VK53	A0A140VK53 [2247-2260]	0	1654.93	0	1.618	0.946	3.483	2.248					118.5	113.2	73.3	50.4	175.4	69.3								Not Found	Not Found	Not Found	Not Found	Not Found	Not Found	High	Not Found	Not Found	Not Found	Not Found	Not Found
	FALSE	High	[R].TPAALAALSLTGSGTPPTAANYPSSSR.[T]	1xPhospho [T/S]	A0A140VK53 1xPhospho [S/T]	FALSE	0.000107515	3.96551e-05	1	2	3	A0A140VK53	A0A140VK53 [2302-2328]	0	2639.27	0																					No Quan Labels	Not Found	Not Found	Not Found	Not Found	Not Found	Not Found	Not Found	Not Found	Not Found	Not Found	Not Found	Not Found
	FALSE	High	[R].TPAAAAAMNLASPR.[T]	1xPhospho [S12]; 1xTMT6plex [N-Term]	A0A140VK53 1xPhospho [S2272]	FALSE	9.35155e-05	3.96551e-05	1	3	4	A0A140VK53	A0A140VK53 [2261-2274]	0	1650.82	0	0.324	0.52	0.332	0.549	0.885712	1	0.536893	1	43.3	103.2	133.6	187.9	62.5	69.4	18.99	7.01	10.84	1.52	0.55	3.13		Not Found	Medium	High	Not Found	Not Found	Not Found	Not Found	Not Found	Not Found	Not Found	Not Found	Not Found
	FALSE	High	[R].HSLSGSSPGMK.[D]	1xPhospho [S7]; 1xOxidation [M10]; 1xTMT6plex [K11]; 1xTMT6plex [N-Term]	A0A140VK53 1xPhospho [S1463]	FALSE	8.40024e-05	3.96551e-05	1	2	4	A0A140VK53	A0A140VK53 [1457-1467]	0	1641.81	0	0.566	0.598	0.651	0.489	1	1	1	1	88.3	59.9	156.1	122.5	79.7	93.4	7.68	44.89	11.79	16.83	5.71	0.51		High	Medium	Not Found	Not Found	Not Found	Not Found	Not Found	Not Found	Not Found	Not Found	Not Found	Not Found
	FALSE	High	[K].GQSQTSPDHR.[S]	1xPhospho [S/T]; 1xTMT6plex [N-Term]	A0A140VK53 1xPhospho [S/T]	FALSE	0.000135298	7.07462e-05	1	2	16	A0A140VK53	A0A140VK53 [1059-1068]	0	1421.64	0	0.412	0.568	1.255	0.117	1	1	1	0.0709622	95.5	6.9	232	59.4	74.6	131.6	6.51	16.38	3.39	6.77	7.95	4.76		High	High	High	High	High	High	Not Found	Not Found	Not Found	Not Found	Not Found	Not Found
	FALSE	High	[R].SLSGSSPCPK.[Q]	1xCarbamidomethyl [C8]; 1xPhospho [S]; 1xTMT6plex [K10]; 1xTMT6plex [N-Term]	A0A140VK53 1xPhospho [S]	FALSE	0.000135675	7.07462e-05	1	4	10	A0A140VK53	A0A140VK53 [778-787]	0	1557.77	0	1.242	1.711	0.521	0.469	1	1	1	1	122.9	49.2	99	104.9	54.7	169.3	19.16	33.04	37.13	22.07	18.46	28.49		High	High	Not Found	Not Found	Not Found	Not Found	Not Found	High	Not Found	Not Found	Not Found	High
	FALSE	High	[R].TPAALAALSLTGSGTPPTAANYPSSSR.[T]	1xTMT6plex [N-Term]		FALSE	0.000125471	7.07462e-05	1	2	2	A0A140VK53	A0A140VK53 [2302-2328]	0	2788.47	0	100		2.484	2.229					140.6	179.2		80.4	199.7									Not Found	Not Found	Not Found	Not Found	Not Found	High	Not Found	Not Found	Not Found	Not Found	Not Found	Not Found
	FALSE	High	[R].HASSSPESPKPAPAPGSHR.[E]	1xPhospho [S]	A0A140VK53 1xPhospho [S]	FALSE	0.000118572	7.07462e-05	1	4	8	A0A140VK53	A0A140VK53 [433-451]	0	1976.9	0																					No Quan Labels	Not Found	Not Found	Not Found	Not Found	Not Found	Not Found	Not Found	Not Found	Not Found	Not Found	Not Found	Not Found
	FALSE	High	[R].HGGSPQPLATTPLSQEPVNPPSEASPTR.[D]	2xPhospho [T/S]	A0A140VK53 2xPhospho [T/S]	FALSE	0.000123717	7.07462e-05	1	4	2	A0A140VK53	A0A140VK53 [374-401]	0	3012.35	0																					No Quan Labels	Not Found	Not Found	Not Found	Not Found	Not Found	Not Found	High	Not Found	Not Found	Not Found	Not Found	Not Found
	FALSE	High	[K].EQNSALPTSSQDEELMEVVEK.[S]	1xPhospho [S/T]; 1xTMT6plex [K21]; 1xTMT6plex [N-Term]	A0A140VK53 1xPhospho [T/S]	FALSE	0.000160076	0.000118124	1	2	20	A0A140VK53	A0A140VK53 [1224-1244]	0	2901.38	0	0.568	0.552	0.652	1.176	1	1	1	1	59.1	157.7	104.1	134.1	87.5	57.5	5.6	6.73	1.55	2.64	6.45	6.07		Not Found	Not Found	Not Found	Not Found	Not Found	Not Found	High	High	Not Found	Not Found	Not Found	Not Found
	FALSE	High	[K].AQTPPGPSLSGSKSPCPQEK.[S]	1xCarbamidomethyl [C16]; 2xPhospho [T3; S14]; 2xTMT6plex [K13; K20]; 1xTMT6plex [N-Term]	A0A140VK53 2xPhospho [T1003; S1014]	FALSE	0.0001536	0.000118124	1	2	1	A0A140VK53	A0A140VK53 [1001-1020]	1	2900.42	0	2.576	2.407	0.331	0.364					200.3	28.9	77.8	79.5	26.3	187.2								Not Found	Not Found	Not Found	Not Found	Not Found	Not Found	Not Found	Not Found	Not Found	Not Found	High	Not Found
	FALSE	High	[R].HSCSGSSPPR.[V]	1xCarbamidomethyl [C3]; 1xPhospho [S7]; 1xTMT6plex [N-Term]	A0A140VK53 1xPhospho [S895]	FALSE	0.000194012	0.000118124	1	4	6	A0A140VK53	A0A140VK53 [889-898]	0	1380.59	0	0.653	0.898	0.66	0.38	1	1	1	1	83.8	50.7	128.4	133.6	88.2	115.3	25.49	28.37	14.42	27.76	22.52	18.95		Not Found	High	Not Found	Not Found	Not Found	Not Found	High	High	Not Found	Not Found	Not Found	Not Found
	FALSE	High	[R].FQSDSSSYPTVDSNSLLGQSR.[L]	1xTMT6plex [N-Term]		FALSE	0.000154023	0.000118124	1	2	2	A0A140VK53	A0A140VK53 [1138-1158]	0	2504.21	0	1.316	0.858	2.6	2.021					110.6	119.8	84.1	59.3	154.1	72.1								Not Found	Not Found	Not Found	Not Found	Not Found	High	Not Found	Not Found	Not Found	Not Found	Not Found	Not Found
	FALSE	High	[R].RGEGDAPFSEPGTTSTQRPSSPETATK.[Q]	1xPhospho [S/T]; 1xTMT6plex [N-Term]; 1xTMT6plex [K27]	A0A140VK53 1xPhospho [S/T]	FALSE	0.000149025	0.000118124	1	6	17	A0A140VK53	A0A140VK53 [303-329]	1	3100.44	0	0.663	0.968	0.655	0.562	1	1	1	1	88	63.6	132.7	113.2	74.1	128.4	8.06	0.55	13.72	8.23	6.4	19.22		Not Found	Not Found	Not Found	Not Found	Not Found	Not Found	High	High	Not Found	Not Found	Not Found	Not Found
	FALSE	High	[K].SEEPAGQILSHLSSELK.[E]	1xPhospho [S13]; 1xTMT6plex [K17]; 1xTMT6plex [N-Term]	A0A140VK53 1xPhospho [S1257]	FALSE	0.000160518	0.000118124	1	2	2	A0A140VK53	A0A140VK53 [1245-1261]	0	2363.23	0	0.356	0.461	0.464	0.544					56.4	84.6	158.5	155.4	72.1	73.1								Not Found	Not Found	Not Found	Not Found	Not Found	Not Found	Not Found	Not Found	Not Found	Not Found	High	Not Found
	FALSE	High	[R].TAVAPSAVNLADPR.[T]	1xTMT6plex [N-Term]		FALSE	0.000182057	0.000118124	1	3	4	A0A140VK53	A0A140VK53 [2275-2288]	0	1610.91	0	1.473	1.065	1.63	1.2					126.5	92.8	85.9	77.3	126	91.4								Not Found	Not Found	High	Not Found	Not Found	Not Found	Not Found	Not Found	Not Found	Not Found	Not Found	Not Found
	FALSE	High	[R].SCFESSPDPELK.[S]	1xCarbamidomethyl [C2]; 1xPhospho [S]; 1xTMT6plex [K12]; 1xTMT6plex [N-Term]	A0A140VK53 1xPhospho [S]	FALSE	0.000187897	0.000118124	1	4	17	A0A140VK53	A0A140VK53 [871-882]	0	1933.9	0	0.674	0.846	0.493	0.472	1	1	1	1	88.6	64.5	131.4	136.8	67.4	111.3	12.68	6.81	11.5	3.96	9.34	13.66		Not Found	Not Found	Not Found	Not Found	Not Found	Not Found	High	High	High	High	Not Found	Not Found
	FALSE	High	[R].HASSSPESPKPAPAPGSHR.[E]	2xPhospho [S]; 1xTMT6plex [N-Term]	A0A140VK53 2xPhospho [S]	FALSE	0.000176465	0.000118124	1	4	4	A0A140VK53	A0A140VK53 [433-451]	0	2286.03	0	0.873	0.621	0.838	0.361					138.5	33.6	158.6	93	77.9	98.5								Not Found	Not Found	Not Found	Not Found	Not Found	High	Not Found	Not Found	Not Found	Not Found	Not Found	Not Found
	FALSE	High	[K].AGMSSNQSISSPVLDAVPRTPSR.[E]	2xPhospho [S11; S/T]; 1xTMT6plex [N-Term]	A0A140VK53 2xPhospho [S1404; S/T]	FALSE	0.00015192	0.000118124	1	2	2	A0A140VK53	A0A140VK53 [1394-1416]	1	2746.28	0	0.566	0.404	0.53	0.661					81.8	95	144.7	143.9	76.2	58.5								Not Found	Not Found	Not Found	Not Found	Not Found	Not Found	Not Found	Not Found	Not Found	High	Not Found	Not Found
	FALSE	High	[R].SPVPSAFSDQSR.[C]	1xTMT6plex [N-Term]		FALSE	0.000187355	0.000118124	1	3	2	A0A140VK53	A0A140VK53 [2449-2460]	0	1506.77	0	1.429	1.192	1.291	1.141					142.6	79.4	99.8	69.5	89.8	119								Not Found	Not Found	Not Found	High	Not Found	Not Found	Not Found	Not Found	Not Found	Not Found	Not Found	Not Found
	FALSE	High	[R].SSTGPEPPAPTPLLAER.[H]	1xTMT6plex [N-Term]		FALSE	0.000160962	0.000118124	1	5	2	A0A140VK53	A0A140VK53 [357-373]	0	1949.05	0	0.412	0.488	1.485	1.743					61.3	130.9	148.7	75.1	111.5	72.6								Not Found	Not Found	Not Found	Not Found	Not Found	Not Found	Not Found	Not Found	Not Found	Not Found	High	Not Found
	FALSE	High	[R].GEGDAPFSEPGTTSTQRPSSPETATK.[Q]	2xPhospho [S19; S20]; 1xTMT6plex [N-Term]	A0A140VK53 2xPhospho [S322; S323]	FALSE	0.000221137	0.000137039	1	6	3	A0A140VK53	A0A140VK53 [304-329]	0	3024.31	0	1.128	1.212	0.625	0.35	1	1	1	1	125.1	40.7	110.9	116.2	72.6	134.5	15.71	10.35	1.76	6.91	18.19	3.42		Not Found	Not Found	Not Found	Not Found	Not Found	High	High	Not Found	Not Found	Not Found	Not Found	Not Found
	FALSE	High	[K].MALPPQEDATASPPRQK.[D]	1xPhospho [S12]; 1xTMT6plex [N-Term]	A0A140VK53 1xPhospho [S1179]	FALSE	0.000212327	0.000137039	1	2	6	A0A140VK53	A0A140VK53 [1168-1184]	1	2146.06	0	0.494	0.635	0.566	0.562	1	1	1	1	74.2	74	150.2	131.7	74.5	95.4	13.28	13.93	29.4	8.94	29.73	10.86		High	High	Not Found	Not Found	Not Found	Not Found	Not Found	Not Found	Not Found	Not Found	Not Found	High
	FALSE	High	[R].RGEGDAPFSEPGTTSTQRPSSPETATK.[Q]	2xPhospho [S20; S21]	A0A140VK53 2xPhospho [S322; S323]	FALSE	0.00019689	0.000137039	1	6	4	A0A140VK53	A0A140VK53 [303-329]	1	2951.25	0																					No Quan Labels	Not Found	Not Found	Not Found	Not Found	Not Found	Not Found	Not Found	Not Found	Not Found	Not Found	Not Found	Not Found
	FALSE	High	[R].HSCSGSSPPRVK.[S]	1xCarbamidomethyl [C3]; 1xPhospho [S7]	A0A140VK53 1xPhospho [S895]	FALSE	0.000419156	0.000146789	1	4	7	A0A140VK53	A0A140VK53 [889-900]	1	1378.59	0																					No Quan Labels	Not Found	Not Found	Not Found	Not Found	High	Not Found	Not Found	Not Found	Not Found	Not Found	Not Found	Not Found
	FALSE	High	[R].GRSECDSSPEPK.[A]	1xCarbamidomethyl [C5]; 1xPhospho [S]; 1xTMT6plex [K12]; 1xTMT6plex [N-Term]	A0A140VK53 1xPhospho [S]	FALSE	0.000476679	0.000146789	1	2	4	A0A140VK53	A0A140VK53 [1476-1487]	1	1886.87	0	0.923	0.969	0.587	0.483	1	1	1	1	112.1	58	121.4	120.2	70.6	117.6	5.28	15.14	1.33	0.94	4.94	0.9		Not Found	Not Found	Not Found	Not Found	Not Found	Not Found	High	Medium	Not Found	Not Found	Not Found	Not Found
	FALSE	High	[R].MSCFSRPSMSPTPLDR.[C]	1xCarbamidomethyl [C3]; 2xPhospho [S8; S10]; 1xOxidation [M]	A0A140VK53 2xPhospho [S2121; S2123]	FALSE	0.00036525	0.000146789	1	3	8	A0A140VK53	A0A140VK53 [2114-2129]	0	2044.77	0																					No Quan Labels	Not Found	Not Found	Not Found	Not Found	Not Found	High	High	Not Found	Not Found	Not Found	Not Found	Not Found
	FALSE	High	[R].MSCFSRPSMSPTPLDR.[C]	1xCarbamidomethyl [C3]; 2xPhospho [S8; S]; 2xOxidation [M1; M9]	A0A140VK53 2xPhospho [S2121; S]	FALSE	0.000479232	0.000146789	1	3	6	A0A140VK53	A0A140VK53 [2114-2129]	0	2060.77	0																					No Quan Labels	Not Found	Not Found	Not Found	Not Found	Not Found	Not Found	High	Not Found	Not Found	Not Found	Not Found	Not Found
	FALSE	High	[R].RGEGDAPFSEPGTTSTQRPSSPETATK.[Q]	2xPhospho [S20; S21]; 1xTMT6plex [N-Term]	A0A140VK53 2xPhospho [S322; S323]	FALSE	0.000361958	0.000146789	1	6	2	A0A140VK53	A0A140VK53 [303-329]	1	3180.41	0	1.315	1.148	0.536	0.422					149	44.7	113.4	105.9	56.8	130.2								Not Found	Not Found	Not Found	Not Found	Not Found	Not Found	High	Not Found	Not Found	Not Found	Not Found	Not Found
	FALSE	High	[K].MALPPQEDATASPPRQK.[D]	1xPhospho [T/S]; 1xOxidation [M1]; 1xTMT6plex [K17]; 1xTMT6plex [N-Term]	A0A140VK53 1xPhospho [S/T]	FALSE	0.000324701	0.000146789	1	2	7	A0A140VK53	A0A140VK53 [1168-1184]	1	2391.21	0	0.387	0.622	0.382	0.391	1	1	1	1	59.7	64	154.3	163.5	62.5	96	11.29	26.29	7.15	4.76	5.2	11.16		Not Found	Not Found	Medium	Not Found	Not Found	Not Found	Not Found	Not Found	Not Found	High	Medium	High
	FALSE	High	[R].MGQAPSQSLLPPAQDQPRSPVPSAFSDQSR.[C]	1xPhospho [S]	A0A140VK53 1xPhospho [S]	FALSE	0.000272187	0.000146789	1	3	6	A0A140VK53	A0A140VK53 [2431-2460]	1	3259.52	0																					No Quan Labels	Not Found	Not Found	Not Found	Not Found	Not Found	Not Found	Not Found	Not Found	Not Found	High	Not Found	Not Found
	FALSE	High	[R].MGQAPSQSLLPPAQDQPRSPVPSAFSDQSR.[C]	1xPhospho [S19]; 1xTMT6plex [N-Term]	A0A140VK53 1xPhospho [S2449]	FALSE	0.000301745	0.000146789	1	3	5	A0A140VK53	A0A140VK53 [2431-2460]	1	3488.68	0	0.258	0.16	0.708	0.871					45.4	118.3	175.9	135.9	96.2	28.2								Not Found	Not Found	Not Found	Not Found	High	Not Found	Not Found	Not Found	Not Found	Not Found	Not Found	Not Found
	FALSE	High	[R].MGQAPSQSLLPPAQDQPRSPVPSAFSDQSR.[C]	1xPhospho [S]; 1xOxidation [M1]; 1xTMT6plex [N-Term]	A0A140VK53 1xPhospho [S]	FALSE	0.000297021	0.000146789	1	3	4	A0A140VK53	A0A140VK53 [2431-2460]	1	3504.68	0	0.235	0.268	0.449	0.234					55.8	33.8	237.5	144.4	64.9	63.7			85.79					Not Found	Not Found	Not Found	Not Found	Not Found	Not Found	Not Found	Not Found	Not Found	Not Found	Not Found	High
	FALSE	High	[R].GEGDAPFSEPGTTSTQRPSSPETATK.[Q]	2xPhospho [S20; S/T]; 1xTMT6plex [K26]; 1xTMT6plex [N-Term]	A0A140VK53 2xPhospho [S323; S/T]	FALSE	0.000487017	0.000146789	1	6	3	A0A140VK53	A0A140VK53 [304-329]	0	3253.47	0	1.27	1.217	0.472	0.422	1	1	1	1	138.7	48.8	109.3	115.7	54.6	133	11.1	7.27	3.08	9.2	2.85	0.43		Not Found	Not Found	Not Found	Not Found	Not Found	Not Found	High	High	Not Found	Not Found	Not Found	Not Found
	FALSE	High	[R].GEGDAPFSEPGTTSTQRPSSPETATK.[Q]	2xPhospho [S19; S20]	A0A140VK53 2xPhospho [S322; S323]	FALSE	0.000228334	0.000146789	1	6	2	A0A140VK53	A0A140VK53 [304-329]	0	2795.14	0																					No Quan Labels	Not Found	Not Found	Not Found	Not Found	Not Found	Not Found	Not Found	Not Found	Not Found	Not Found	Not Found	Not Found
	FALSE	High	[R].GEGDAPFSEPGTTSTQRPSSPETATK.[Q]	1xPhospho [T/S]	A0A140VK53 1xPhospho [T/S]	FALSE	0.000309078	0.000146789	1	6	12	A0A140VK53	A0A140VK53 [304-329]	0	2715.18	0																					No Quan Labels	Not Found	Not Found	Not Found	Not Found	Not Found	Not Found	Not Found	Not Found	Not Found	Not Found	Not Found	Not Found
	FALSE	High	[R].GEFSASPMLK.[S]	1xPhospho [S]; 1xTMT6plex [K10]; 1xTMT6plex [N-Term]	A0A140VK53 1xPhospho [S]	FALSE	0.000395365	0.000146789	1	2	6	A0A140VK53	A0A140VK53 [1119-1128]	0	1604.82	0	0.304	0.298	0.452	0.541	1	1	1	1	54.4	85.1	179	157.2	71	53.3	0.92	15.91	7.77	2.38	6.49	3.15		Not Found	High	High	Not Found	Not Found	Not Found	Not Found	Not Found	Not Found	Not Found	Not Found	Not Found
	FALSE	High	[R].QSHSESPSLQSK.[S]	1xPhospho [S6]; 1xTMT6plex [K12]; 1xTMT6plex [N-Term]	A0A140VK53 1xPhospho [S1083]	FALSE	0.000244807	0.000146789	1	2	10	A0A140VK53	A0A140VK53 [1078-1089]	0	1852.92	0	0.635	1.019	0.61	0.56	1	1	1	1	75.1	73.8	118.4	131.7	80.3	120.7	12.58	14.11	4.62	18.64	11.75	22.7		Not Found	Not Found	Medium	Not Found	Not Found	Not Found	Not Found	High	High	High	Not Found	Not Found
	FALSE	High	[R].QSHSSSSPHPK.[V]	1xPhospho [S]; 1xTMT6plex [K11]; 1xTMT6plex [N-Term]	A0A140VK53 1xPhospho [S]	FALSE	0.000403048	0.000146789	1	4	5	A0A140VK53	A0A140VK53 [833-843]	0	1716.85	0	0.516	0.633	1.151	0.225	1	1	1	1	108.5	14	210.4	62.2	71.6	133.2	17	35.64	5.94	30.07	51.22	42.54		Not Found	Not Found	Not Found	Not Found	Not Found	Not Found	Not Found	Not Found	High	Not Found	Medium	Not Found
	FALSE	High	[R].TAVAPSAVNLADPR.[T]			FALSE	0.000252502	0.000146789	1	3	2	A0A140VK53	A0A140VK53 [2275-2288]	0	1381.74	0																					No Quan Labels	Not Found	Not Found	Not Found	Not Found	Not Found	Not Found	Not Found	Not Found	Not Found	Not Found	Not Found	Not Found
	FALSE	High	[R].SSSASSPEMK.[D]	1xPhospho [S]; 1xOxidation [M9]; 1xTMT6plex [K10]; 1xTMT6plex [N-Term]	A0A140VK53 1xPhospho [S]	FALSE	0.000405006	0.000146789	1	2	8	A0A140VK53	A0A140VK53 [1419-1428]	0	1564.73	0	0.859	1.323	0.453	0.283	1	1	1	1	94.9	40.4	110.6	143	64.8	146.3	4.98	17.41	25.48	8.72	2.92	8.12		Not Found	Not Found	Not Found	Not Found	Not Found	Not Found	High	High	Not Found	Not Found	Not Found	Not Found
	FALSE	High	[R].SSGHSSSELSPDAVEK.[A]	1xPhospho [S10]; 1xTMT6plex [K16]; 1xTMT6plex [N-Term]	A0A140VK53 1xPhospho [S1387]	FALSE	0.000350822	0.000146789	1	2	2	A0A140VK53	A0A140VK53 [1378-1393]	0	2155.03	0	0.58	0.678	0.602	0.382					88.4	49.3	152.4	129.1	77.7	103.3								Not Found	Not Found	Not Found	Not Found	Not Found	Not Found	High	Not Found	Not Found	Not Found	Not Found	Not Found
	FALSE	High	[R].YSHSGSSSPDTK.[V]	2xPhospho [S]; 1xTMT6plex [K12]; 1xTMT6plex [N-Term]	A0A140VK53 2xPhospho [S]	FALSE	0.000386093	0.000146789	1	4	11	A0A140VK53	A0A140VK53 [967-978]	0	1641.64	0	1.035	0.997	1.031	0.16	1	1	1	1	167.4	8	161.7	50	51.6	161.3	9.84	34.41	10.75	34.62	55.44	18.96		Not Found	Medium	Not Found	High	Not Found	Medium	High	Not Found	Not Found	Not Found	Not Found	Not Found
	FALSE	High	[K].AGMSSNQSISSPVLDAVPRTPSR.[E]	1xPhospho [T/S]; 1xOxidation [M3]; 1xTMT6plex [N-Term]	A0A140VK53 1xPhospho [T/S]	FALSE	0.000262492	0.000146789	1	2	3	A0A140VK53	A0A140VK53 [1394-1416]	1	2682.31	0	0.211	0.284	0.29	0.342					33	76.6	156.6	224.3	65	44.5								Not Found	Not Found	Not Found	Not Found	Not Found	Not Found	Not Found	Not Found	Not Found	Not Found	Not Found	High
	FALSE	High	[K].AGMSSNQSISSPVLDAVPRTPSRER.[S]	1xPhospho [T/S]; 1xOxidation [M3]; 1xTMT6plex [N-Term]	A0A140VK53 1xPhospho [S/T]	FALSE	0.000331616	0.000146789	1	2	4	A0A140VK53	A0A140VK53 [1394-1418]	2	2967.46	0	0.115	0.275	0.373	0.554					21.6	97.4	188.1	175.7	65.5	51.7								Not Found	Not Found	Not Found	Not Found	Not Found	Not Found	Not Found	Not Found	Not Found	Not Found	Not Found	High
	FALSE	High	[K].AQTPPGPSLSGSKSPCPQEK.[S]	1xCarbamidomethyl [C16]; 1xPhospho [S14]; 1xTMT6plex [K]; 1xTMT6plex [N-Term]	A0A140VK53 1xPhospho [S1014]	FALSE	0.000275218	0.000146789	1	2	7	A0A140VK53	A0A140VK53 [1001-1020]	1	2591.29	0	0.958	1.388	0.46	0.329	1	1	1	1	122	32	127.4	97.2	44.7	176.7	2.58	6.55	2.96	8.51	14.6	1.56		Not Found	High	Not Found	Not Found	Not Found	Not Found	Not Found	Not Found	Not Found	Not Found	High	High
	FALSE	High	[R].SGAGSSPETK.[E]	1xPhospho [S]; 1xTMT6plex [K10]; 1xTMT6plex [N-Term]	A0A140VK53 1xPhospho [S]	FALSE	0.000397263	0.000146789	1	2	3	A0A140VK53	A0A140VK53 [1214-1223]	0	1458.72	0	0.563	0.696	1.065	0.177					122.9	8.4	218.4	47.6	50.7	151.9								Not Found	Not Found	Not Found	Not Found	Not Found	Not Found	Not Found	High	Not Found	Not Found	Not Found	Not Found
	FALSE	High	[K].ELSNSPLRENSFGSPLEFR.[N]	2xPhospho [S]	A0A140VK53 2xPhospho [S]	FALSE	0.000322004	0.000146789	1	2	10	A0A140VK53	A0A140VK53 [1316-1334]	1	2339.01	0																					No Quan Labels	Not Found	Not Found	Not Found	Not Found	Not Found	Not Found	High	High	High	Not Found	Not Found	Not Found
	FALSE	High	[R].EISSSPTSK.[N]	1xPhospho [S]; 1xTMT6plex [K9]; 1xTMT6plex [N-Term]	A0A140VK53 1xPhospho [S]	FALSE	0.000403048	0.000146789	1	4	3	A0A140VK53	A0A140VK53 [452-460]	0	1473.76	0	0.737	0.839	0.439	0.349					98.8	49.7	134	142.5	62.5	112.5								Not Found	Not Found	Not Found	Not Found	Not Found	Not Found	Not Found	Not Found	High	Not Found	Not Found	Not Found
	FALSE	High	[K].EQNSALPTSSQDEELMEVVEK.[S]	1xTMT6plex [K21]; 1xTMT6plex [N-Term]		FALSE	0.000403048	0.000146789	1	2	2	A0A140VK53	A0A140VK53 [1224-1244]	0	2821.42	0	0.874	0.522	2.123	2.635					69.4	187.5	79.4	71.2	151.1	41.4								Not Found	Not Found	Not Found	Not Found	Not Found	Not Found	Not Found	High	Not Found	Not Found	Not Found	Not Found
	FALSE	High	[K].EQNSALPTSSQDEELMEVVEK.[S]	1xPhospho [S/T]; 1xOxidation [M16]; 1xTMT6plex [K21]; 1xTMT6plex [N-Term]	A0A140VK53 1xPhospho [S/T]	FALSE	0.000343217	0.000146789	1	2	9	A0A140VK53	A0A140VK53 [1224-1244]	0	2917.38	0	0.821	1.717	0.428	0.553					71.5	81.4	87.1	147.3	63	149.6								Not Found	Not Found	Not Found	Not Found	Not Found	Not Found	High	Not Found	Not Found	Not Found	Not Found	Not Found
	FALSE	High	[K].SGTPPRQGSITSPQANEQSVTPQR.[R]	2xPhospho [T3; S/T]; 1xTMT6plex [N-Term]	A0A140VK53 2xPhospho [T848; T/S]	FALSE	0.000324701	0.000146789	1	4	4	A0A140VK53	A0A140VK53 [846-869]	1	2912.35	0	1.725	1.726	0.514	0.584					148.9	60	86.3	102.8	52.9	149								Not Found	Not Found	Not Found	Not Found	Not Found	Not Found	High	Not Found	Not Found	Not Found	Not Found	Not Found
	FALSE	High	[R].TAAALAPASLTSAR.[M]	1xTMT6plex [N-Term]		FALSE	0.000642378	0.000151834	1	2	2	A0A140VK53	A0A140VK53 [2357-2370]	0	1529.88	0	1.397	1.046	5.154	4.383					111.3	135.4	79.7	30.9	159.2	83.4								Not Found	Not Found	Not Found	Not Found	Not Found	Not Found	Not Found	High	Not Found	Not Found	Not Found	Not Found
	FALSE	High	[R].RRPSPQPSPR.[D]	1xPhospho [S4]	A0A140VK53 1xPhospho [S2702]	FALSE	0.000626862	0.000151834	1	3	8	A0A140VK53	A0A140VK53 [2699-2708]	1	1257.62	0																					No Quan Labels	High	Not Found	Not Found	Not Found	Not Found	Not Found	Not Found	Not Found	Not Found	Not Found	Not Found	Not Found
	FALSE	High	[R].GEFSASPMLK.[S]	1xPhospho [S6]; 1xTMT6plex [K10]; 1xTMT6plex [N-Term]	A0A140VK53 1xPhospho [S1124]	FALSE	0.000593854	0.000151834	1	2	4	A0A140VK53	A0A140VK53 [1119-1128]	0	1375.65	0	0.506	0.405	0.735	0.594	1	1	1	1	76.7	79.1	151.6	133.3	97.9	61.4	20.55	11.8	18.42	4.78	6.14	5.23		Not Found	Not Found	Not Found	Not Found	Not Found	Not Found	Not Found	Not Found	High	Not Found	Not Found	High
	FALSE	High	[K].AQTPPGPSLSGSKSPCPQEK.[S]	1xCarbamidomethyl [C16]; 1xPhospho [S14]; 1xTMT6plex [N-Term]	A0A140VK53 1xPhospho [S1014]	FALSE	0.000608209	0.000151834	1	2	4	A0A140VK53	A0A140VK53 [1001-1020]	1	2362.13	0	1.251	1.585	0.605	0.369	1	1	1	1	135	34.8	107.9	94.2	57	171	0.85	2.35	1.25	0.54	4.33	0.55		Not Found	Not Found	Not Found	Not Found	Not Found	Not Found	Not Found	Not Found	High	High	Not Found	Not Found
	FALSE	High	[K].AQTPPGPSLSGSK.[S]	1xPhospho [T3]	A0A140VK53 1xPhospho [T1003]	FALSE	0.000728651	0.000151834	1	3	2	A0A140VK53	A0A140VK53 [1001-1013]	0	1306.6	0																					No Quan Labels	Not Found	Not Found	Not Found	Not Found	Not Found	High	Not Found	Not Found	Not Found	Not Found	Not Found	Not Found
	FALSE	High	[R].TSPPLLDR.[A]	1xPhospho [S2]; 1xTMT6plex [N-Term]	A0A140VK53 1xPhospho [S2398]	FALSE	0.000733377	0.000151834	1	2	6	A0A140VK53	A0A140VK53 [2397-2404]	0	1207.63	0	0.606	0.701	0.461	0.437	1	1	1	1	82.4	65.9	136	150.9	69.5	95.4	5.07	6.26	5.59	2.32	3.73	3.31		Not Found	Not Found	Not Found	Not Found	Not Found	Not Found	Not Found	High	High	High	Not Found	Not Found
	FALSE	High	[R].YSHSGSSSPDTK.[V]	1xPhospho [S8]; 1xTMT6plex [K12]; 1xTMT6plex [N-Term]	A0A140VK53 1xPhospho [S974]	FALSE	0.00067933	0.000151834	1	4	2	A0A140VK53	A0A140VK53 [967-978]	0	1790.84	0	0.512	0.543	0.774	0.178					91.5	21.2	178.9	119.1	92.1	97.1								Not Found	Not Found	Not Found	Not Found	Not Found	Not Found	Not Found	Not Found	Not Found	High	Not Found	Not Found
	FALSE	High	[K].TVARTPLGQR.[S]	1xPhospho [T5]	A0A140VK53 1xPhospho [T1531]	FALSE	0.000915524	0.000163068	1	2	4	A0A140VK53	A0A140VK53 [1527-1536]	1	1178.6	0																					No Quan Labels	Not Found	Not Found	Not Found	Not Found	High	Not Found	Not Found	Not Found	Not Found	Not Found	Not Found	Not Found
	FALSE	High	[R].SSSASSPEMK.[D]	1xPhospho [S]; 1xTMT6plex [K10]; 1xTMT6plex [N-Term]	A0A140VK53 1xPhospho [S]	FALSE	0.000928395	0.000163068	1	2	8	A0A140VK53	A0A140VK53 [1419-1428]	0	1548.74	0	1.029	1.206	0.521	0.608	1	1	1	1	97.5	83.7	94.8	137.8	71.9	114.3	4.85	2.55	7.7	0.61	0.56	3.04		Not Found	Not Found	Not Found	Not Found	Not Found	Not Found	Not Found	High	High	Not Found	Not Found	Not Found
	FALSE	High	[R].ENSFGSPLEFR.[N]	1xPhospho [S6]; 1xTMT6plex [N-Term]	A0A140VK53 1xPhospho [S1329]	FALSE	0.000814996	0.000163068	1	2	4	A0A140VK53	A0A140VK53 [1324-1334]	0	1591.74	0	0.479	0.522	0.426	0.355	1	1	1	1	76.1	56.3	158.7	158.6	67.5	82.9	1.78	5.05	3.2	4.15	2.33	1.7		Not Found	Not Found	Not Found	Not Found	Not Found	Not Found	Not Found	Not Found	High	High	Not Found	Not Found
	FALSE	High	[K].MALPPQEDATASPPRQK.[D]	1xPhospho [T/S]; 1xOxidation [M1]; 1xTMT6plex [N-Term]; 1xTMT6plex [K17]	A0A140VK53 1xPhospho [S/T]	FALSE	0.000848737	0.000163068	1	2	4	A0A140VK53	A0A140VK53 [1168-1184]	1	2162.05	0	0.399	0.561	0.555	0.955	0.433082	1	1	1	54.7	126	137.2	132	73.2	76.9	13.06	26.13	19.95	10.95	12.53	4.61		High	Not Found	Not Found	Not Found	Not Found	Not Found	Not Found	High	High	Not Found	Not Found	Not Found
	FALSE	High	[R].MSCFSRPSMSPTPLDR.[C]	1xCarbamidomethyl [C3]; 1xPhospho [S10]; 2xOxidation [M1; M9]	A0A140VK53 1xPhospho [S2123]	FALSE	0.00107864	0.000173014	1	3	2	A0A140VK53	A0A140VK53 [2114-2129]	0	1980.8	0																					No Quan Labels	Not Found	Not Found	Not Found	Not Found	Not Found	Not Found	High	Not Found	Not Found	Not Found	Not Found	Not Found
	FALSE	High	[R].QGSITSPQANEQSVTPQRR.[S]	2xPhospho [T15; T/S]; 1xTMT6plex [N-Term]	A0A140VK53 2xPhospho [T866; T/S]	FALSE	0.00107082	0.000173014	1	4	2	A0A140VK53	A0A140VK53 [852-870]	1	2473.14	0	1.316	1.151	0.444	0.444					134.6	57.7	102.3	130	57.7	117.7								Not Found	Not Found	Not Found	Not Found	Not Found	Not Found	High	Not Found	Not Found	Not Found	Not Found	Not Found
	FALSE	High	[K].SATRPSPSPERSSTGPEPPAPTPLLAER.[H]	3xPhospho [S/T]	A0A140VK53 3xPhospho [S/T]	FALSE	0.00111883	0.000173014	1	5	7	A0A140VK53	A0A140VK53 [346-373]	1	3125.37	0																					No Quan Labels	Not Found	Not Found	Not Found	Not Found	Not Found	Not Found	High	Not Found	Not Found	Not Found	Not Found	Not Found
	FALSE	High	[R].SGAGSSPETK.[E]	1xTMT6plex [K10]; 1xTMT6plex [N-Term]		FALSE	0.00118705	0.000173014	1	2	2	A0A140VK53	A0A140VK53 [1214-1223]	0	1378.76	0	1.119	1.458	1.511	0.738					120.9	48.5	108.1	65.7	99.3	157.5								Not Found	Not Found	Not Found	Not Found	Not Found	Not Found	Not Found	Not Found	Not Found	Not Found	High	Not Found
[truncated: 108,096 more rows]
[truncated: 74 more columns]
